# Supplementary material for: Histone H3.3 Mutations Drive Pediatric Glioblastoma through Upregulation of MYCN
Source: Oxford University Press journal article supplement (doi:10.1158/2159-8290.cd-12-0426), 2013-03-29
Supplement: 21598290cd120426-sup-tab1.xlsx [file 21598290cd120426-sup-tab1.xlsx]

## Sheet: Supplementary Table S1
Supplementary Table S1

## Sheet: Clinical
Sample	Study	Diagnosis	H3F3A	Age (years)	Survival (years)	Censor
GBM_2	Schwartzentruber 2012	Glioblastoma	K27	5	0.5	Died of disease
GBM_4	Schwartzentruber 2012	Glioblastoma	K27	10	0.5	Died of disease
GBM_6	Schwartzentruber 2012	Glioblastoma	K27	11	0.4	Died of disease
GBM_8	Schwartzentruber 2012	Glioblastoma	K27	6	1	Died of disease
GBM_9	Schwartzentruber 2012	Glioblastoma	K27	8	0.6	Died of disease
GBM_11	Schwartzentruber 2012	Glioblastoma	G34	13	1.5	Died of disease
GBM_14	Schwartzentruber 2012	Glioblastoma	G34	15	1.5	Alive
GBM_15	Schwartzentruber 2012	Glioblastoma	G34	13	1.2	Died of disease
GBM_16	Schwartzentruber 2012	Glioblastoma	G34	20	NA	NA
GBM_17	Schwartzentruber 2012	Glioblastoma	wild-type	NA	NA	NA
GBM_22	Schwartzentruber 2012	Glioblastoma	wild-type	NA	NA	NA
GBM_24	Schwartzentruber 2012	Glioblastoma	wild-type	14	1.2	Died of disease
GBM_26	Schwartzentruber 2012	Glioblastoma	wild-type	14	0.4	Died of disease
GBM_27	Schwartzentruber 2012	Glioblastoma	wild-type	9	0.8	Died of disease
GBM_29	Schwartzentruber 2012	Glioblastoma	wild-type	NA	NA	NA
GBM_30	Schwartzentruber 2012	Glioblastoma	wild-type	6	NA	NA
GBM_35	Schwartzentruber 2012	Glioblastoma	wild-type	7	NA	NA
GBM_37	Schwartzentruber 2012	Glioblastoma	wild-type	7	NA	NA
GBM_39	Schwartzentruber 2012	Glioblastoma	wild-type	12	2	Alive
GBM_40	Schwartzentruber 2012	Glioblastoma	wild-type	14	1.3	Alive
GBM_41	Schwartzentruber 2012	Glioblastoma	wild-type	7	0.8	Died of disease
GBM_42	Schwartzentruber 2012	Glioblastoma	wild-type	2	0.7	Died of disease
GBM_43	Schwartzentruber 2012	Glioblastoma	wild-type	16	1	Died of disease
GBM_45	Schwartzentruber 2012	Glioblastoma	wild-type	9	1	Died of disease
GBM_46	Schwartzentruber 2012	Glioblastoma	wild-type	14	4.6	Alive
GBM_47	Schwartzentruber 2012	Glioblastoma	wild-type	14	1.2	Died of disease
GBM_49	Schwartzentruber 2012	Glioblastoma	wild-type	5	NA	NA
HGG001	Paugh 2010	Glioblastoma	wild-type	6	2	Died of disease
HGG005	Paugh 2010	Glioblastoma	wild-type	17	0.8	Died of disease
HGG006	Paugh 2010	Glioblastoma	K27	6	0.4	Died of disease
HGG008	Paugh 2010	Glioblastoma	wild-type	17	4.9	Alive
HGG010	Paugh 2010	Glioblastoma	K27	18	0.8	Died of disease
HGG014	Paugh 2010	Glioblastoma	G34	7	1.6	Died of disease
HGG020	Paugh 2010	Glioblastoma	wild-type	14	3	Alive
HGG023	Paugh 2010	Glioblastoma	wild-type	10	1.2	Died of disease
HGG026	Paugh 2010	Glioblastoma	wild-type	20	7.6	Alive
HGG027	Paugh 2010	Glioblastoma	wild-type	10	2	Died of disease
HGG028	Paugh 2010	Glioblastoma	wild-type	20	0.9	Died of disease
HGG031	Paugh 2010	Glioblastoma	K27	1	2.5	Died of disease
HGG084	Paugh 2010	Glioblastoma	wild-type	1	NA	NA
HGG085	Paugh 2010	Glioblastoma	wild-type	10	NA	NA
HGG145	Paugh 2010	Glioblastoma	G34	14	1.4	Died of disease
HGG151	Paugh 2010	Glioblastoma	wild-type	9	2.3	Died of disease
HGG153	Paugh 2010	Glioblastoma	wild-type	13	2.6	Died of disease
HGG154	Paugh 2010	Glioblastoma	wild-type	4	0.3	Died of disease
HGG157	Paugh 2010	Glioblastoma	G34	15	1.1	Died of disease
HGG158	Paugh 2010	Glioblastoma	K27	11	0.4	Died of disease
HGG159	Paugh 2010	Glioblastoma	wild-type	13	0.7	Died of disease
HGG160	Paugh 2010	Glioblastoma	G34	14	2.3	Alive
HGG162	Paugh 2010	Glioblastoma	K27	14	0.1	Died of disease

## Sheet: Expression
Gene ID	GBM_2	GBM_4	GBM_6	GBM_8	GBM_9	GBM_11	GBM_14	GBM_15	GBM_16	GBM_17	GBM_22	GBM_24	GBM_26	GBM_27	GBM_29	GBM_30	GBM_35	GBM_37	GBM_39	GBM_40	GBM_41	GBM_42	GBM_43	GBM_45	GBM_46	GBM_47	GBM_49	HGG001	HGG005	HGG006	HGG008	HGG010	HGG014	HGG020	HGG023	HGG026	HGG027	HGG028	HGG031	HGG084	HGG085	HGG145	HGG151	HGG153	HGG154	HGG157	HGG158	HGG159	HGG160
1/2-SBSRNA4	5.34526	6.29641	5.2817	5.127	4.85148	5.20509	4.70811	5.24511	5.57757	5.15453	5.50409	5.37232	5.48547	5.56057	5.37719	5.19884	5.5774	5.5788	5.13284	4.70557	4.87991	6.00983	4.73403	5.55996	6.10794	4.79834	4.60994	4.62216	4.87151	4.64073	4.9384	4.40899	4.98195	4.55153	4.51912	4.48067	4.64121	4.32854	4.60442	4.54363	4.58329	4.58097	4.583	5.01571	5.13776	4.14947	4.93827	4.92185	4.6462
A1BG	6.1711	6.65772	5.69777	6.36576	6.89285	5.80067	6.20215	5.97595	6.13095	5.98779	6.91313	6.51381	6.69324	6.84597	6.37501	6.867	6.47351	6.10784	5.47473	6.15747	5.78008	6.57037	7.01186	6.06424	6.47951	6.67534	6.344	6.80278	5.95759	5.66871	6.27855	5.69051	6.1769	6.31507	5.36546	6.68587	6.07401	7.13167	5.9373	5.58019	6.37121	5.6861	6.53473	5.84223	5.84625	5.75592	6.40255	6.88256	5.71062
A1BG-AS1	5.38791	5.17164	5.33011	5.09055	5.01652	5.04076	5.66779	4.86481	4.6349	4.77713	5.41443	5.24104	5.56053	4.93238	5.20017	5.27756	4.85581	4.75855	4.5624	4.97796	4.81559	5.31317	5.45781	4.82257	5.08489	5.60927	5.14035	5.85111	5.03538	4.74087	4.98122	4.64348	4.91169	4.74108	4.34922	5.1801	5.00527	4.99366	4.69663	4.51375	4.64362	4.40307	5.0931	5.30338	4.65952	4.61328	5.20494	5.33438	5.04202
A1CF	4.12472	4.4864	4.66087	4.70201	4.41985	4.2985	4.56047	4.33076	4.24923	4.42402	4.19462	4.56645	4.32993	4.54857	4.69109	4.7201	4.65342	4.59217	4.47622	4.40291	4.42833	4.24661	4.51048	4.58892	4.45751	4.57348	4.55107	4.49589	4.85354	4.36758	4.38309	4.65118	4.55321	4.30861	4.00112	4.52635	4.57718	4.64424	4.02095	4.27011	4.33661	4.44087	4.36633	3.85438	4.53113	4.11137	4.49132	4.34737	4.59049
A2LD1	4.37292	4.20655	4.25196	6.05745	4.66113	5.27545	4.78326	5.19317	3.9014	4.78814	4.89263	6.11464	3.83769	4.82359	4.33883	4.43416	4.41241	5.58324	4.46428	3.82447	4.17797	5.19645	3.9073	5.56587	4.74219	5.14358	4.68618	3.97162	3.75901	5.77013	4.41783	4.73529	4.27868	5.12366	4.16374	3.98677	3.99863	4.58195	4.68763	4.44999	4.06744	3.92813	4.15134	4.26453	3.86694	4.14528	5.75434	3.89522	4.30937
A2M	11.5673	10.2117	11.3534	12.3745	11.0403	11.1676	10.8768	9.32196	10.9981	11.4531	9.35971	11.5414	10.3248	9.7378	11.5418	10.8934	12.1239	11.2486	11.5607	11.9819	11.4323	8.84244	12.0108	9.70844	11.3104	10.9085	12.1566	10.3696	9.55426	10.1145	11.6543	13.0131	9.88993	11.1066	11.3807	11.5522	11.1807	11.1593	11.0333	11.3702	11.6394	9.48641	12.059	8.40066	10.703	11.217	8.2559	10.1407	9.7251
A2ML1	4.04962	3.73523	3.81354	4.16321	3.70462	3.78397	3.63619	4.02642	4.94345	3.66689	3.62716	3.98184	3.79611	3.84802	3.84284	4.13879	3.9287	4.7942	3.86574	3.67313	3.70414	3.86286	4.00006	3.93786	3.58918	3.95958	3.82093	3.91588	4.11297	3.61871	4.05134	3.75992	4.09973	3.68095	4.15525	3.97198	3.94978	4.05664	3.90476	3.68925	4.14387	3.87311	3.90524	3.70122	3.88784	4.37143	3.89594	3.78753	4.69633
A4GALT	5.44335	5.54312	5.42141	5.3075	5.35387	5.61135	5.81249	5.50607	5.26936	5.60932	5.25202	5.40473	5.38425	5.91873	5.60659	5.63578	5.31669	5.70994	5.49733	5.55042	5.36719	5.37302	5.37986	5.78304	5.57409	5.6903	5.9423	5.74526	5.92718	5.10359	5.47051	5.59454	5.371	5.72679	5.38445	5.39672	5.69358	5.44122	5.30923	5.02434	5.4953	5.27392	5.58825	5.92104	5.11272	5.40245	5.8385	5.49343	5.78962
A4GNT	3.89081	3.76441	3.81888	4.10751	3.78732	3.84165	3.95148	3.8255	4.21887	3.87425	3.69844	3.76264	3.81578	3.71496	3.92063	4.26908	3.90069	3.86321	3.81417	3.89863	4.11183	3.92718	4.0074	3.77662	3.94143	3.9634	4.12255	3.78032	4.11124	3.89187	3.9491	4.17405	4.02593	3.95578	3.75551	3.83588	3.80237	3.79836	4.02124	3.59377	3.98546	3.84781	3.89123	3.90885	3.95527	4.09757	3.96446	4.06324	4.0112
AA06	3.67698	3.73726	4.28751	3.74066	3.85744	3.94072	3.83791	3.70778	3.85108	3.79951	3.80694	4.03987	3.60915	3.89707	3.68499	4.44474	3.64147	3.76677	3.68596	3.78518	3.64863	3.91049	3.86541	3.92167	3.84508	3.9715	4.09703	3.94694	4.01947	3.65367	4.41652	4.08078	3.73467	3.57145	3.55458	3.54352	3.77613	3.82139	3.78607	3.50974	3.91738	4.13154	3.49633	3.65229	3.99244	3.61455	3.94371	3.89693	4.0553
AAA1	3.23241	3.66036	3.30107	4.13178	3.37968	3.21052	3.51042	3.47063	3.31063	3.21643	3.53442	3.58165	3.25566	3.15298	3.41143	3.95945	3.44302	3.28949	3.05219	3.21614	3.6209	3.46687	3.41212	3.24887	3.17555	3.452	3.47688	3.82802	3.21052	3.3863	3.33089	3.98218	2.98946	3.33051	3.04935	3.05494	2.95847	3.18965	3.43816	3.15314	3.14249	3.63859	3.44471	3.35702	3.07329	3.31598	3.44795	3.03799	3.31402
AAAS	5.59333	6.06593	5.93739	5.67423	5.62131	5.89744	5.99303	5.97957	5.93259	5.74322	5.82967	5.77922	5.96642	5.90502	5.5649	6.41887	5.95612	5.93367	5.34986	5.90514	5.8893	5.80197	6.24665	5.67937	5.63341	5.41051	6.05246	6.82803	6.7474	6.81257	7.01077	6.85626	7.19641	7.22101	7.15137	7.16552	7.00514	7.15979	6.70892	6.68823	6.97087	7.04374	7.09175	6.85504	7.51118	6.95121	7.44735	6.91208	6.73167
AACS	6.63802	7.10547	6.70778	6.82417	7.15961	7.30943	8.60108	6.55701	7.57627	7.66416	8.41446	6.85275	7.2925	7.0756	6.74697	6.72903	7.43923	6.92101	7.44589	6.81452	7.20614	7.93736	7.72208	6.67842	5.85124	6.29681	6.57265	8.38161	7.20219	7.46711	7.10382	6.53706	7.32926	7.01479	7.17185	7.39299	8.18637	7.69837	7.26672	6.65525	6.79931	7.37819	6.83211	7.41148	7.5127	7.16008	7.4736	7.26435	8.18652
AACSP1	2.62117	3.00299	2.6702	2.8654	2.76881	2.85864	2.99167	2.66408	3.01787	2.80662	2.67225	2.81036	2.72488	2.73656	2.96255	2.9428	2.98618	2.62509	2.75374	2.76693	2.94465	2.62167	2.82987	2.97267	2.69431	2.60844	3.10176	3.05955	2.90744	2.58117	2.86715	3.05024	3.75894	2.90348	2.55825	2.96974	2.66747	3.1786	2.92447	2.55817	2.59752	2.98404	2.78316	2.77756	2.91746	2.90111	2.84979	2.95419	3.07172
AADAC	3.30979	3.49855	3.82546	3.60544	3.34266	3.48787	3.87451	3.59218	3.67023	3.37994	3.59414	3.61497	3.37779	3.52202	3.49513	3.60983	3.38753	3.54502	3.39668	3.50996	3.54226	3.65463	3.45893	3.42631	3.61423	3.59823	3.55055	3.6552	3.91886	3.48585	3.93996	3.81036	3.83588	3.76768	3.40236	3.98687	3.41013	3.73993	3.50975	3.54577	3.58577	3.84884	3.6541	3.41249	3.63948	3.54183	4.91143	3.71916	3.81959
AADACL2	2.89215	2.77249	2.79528	2.67278	2.72524	2.73092	2.73214	2.85001	2.82069	2.91859	2.75518	2.73593	2.72583	2.73037	2.74656	2.98506	2.79372	2.73121	2.83068	2.6252	2.74746	2.83447	2.71329	2.78316	2.96404	2.64692	2.67127	3.13069	3.38479	2.84503	2.77884	2.89578	2.78242	2.86305	2.68305	2.94524	2.72743	2.95309	2.52094	2.86364	2.71689	2.87281	2.80464	3.16093	2.93829	2.90818	3.17824	2.72184	2.81205
AADAT	6.96219	6.75736	5.65996	6.11171	7.24319	7.35362	4.79799	5.30433	6.22865	6.37685	6.93607	5.96836	6.19824	6.3392	6.14007	6.9365	5.80696	6.3791	6.128	5.47873	6.92336	6.85552	6.2364	6.68744	6.52414	6.17437	6.07362	6.25038	7.24704	6.76739	5.52702	6.45761	7.09618	6.98004	6.82288	7.3582	6.84568	6.47442	6.38813	6.76464	6.10471	5.73111	6.12303	6.84746	6.89004	5.97859	6.32429	7.20923	6.232
AAGAB	4.07018	3.50907	3.43404	3.58113	3.61394	3.9455	3.86472	3.93621	4.02766	3.15305	3.75166	3.91563	3.23497	3.59281	3.38632	3.73628	3.44105	3.89706	3.38342	3.05787	4.22311	3.54989	3.54037	3.2545	3.69101	3.32806	3.49982	4.07897	3.51997	3.90315	3.71936	3.83175	4.42959	3.90855	3.48779	3.36656	3.38698	3.58051	3.41431	4.74125	3.42236	4.53265	3.93138	4.66475	3.88119	5.62373	4.31181	3.68968	3.85943
AAK1	3.38808	6.0894	3.52257	3.15623	3.12667	3.02357	3.09218	3.45118	3.09719	3.61208	3.37252	3.34434	3.7933	3.41124	3.57944	3.52295	5.47195	2.9609	3.0307	2.92404	3.04235	3.4941	3.02718	3.06709	2.89899	2.89145	3.01326	2.87223	3.53362	4.50935	3.54261	3.60457	3.33174	4.92776	4.01588	4.2344	7.6817	3.49222	3.27983	4.68641	4.40216	3.17049	3.65611	5.21386	3.4954	3.42035	2.94876	5.80182	7.76344
AAMP	7.77399	7.99904	7.58343	8.05296	7.94982	7.71178	7.90318	7.88855	8.09445	7.98311	8.13935	8.737	8.21499	8.54963	7.88498	8.52828	7.95091	8.05722	8.08701	7.98945	7.76033	7.91586	8.16666	8.05619	8.29592	8.25456	7.81468	8.18247	6.75165	7.75147	8.41156	7.29408	7.84976	8.23927	8.19482	8.24737	7.93125	7.91911	8.06494	7.63731	8.1193	7.71259	7.96163	8.30439	8.34898	8.11421	8.14377	7.91957	7.80791
AANAT	3.58566	3.29823	3.60269	3.1719	3.22952	3.32255	3.04165	3.36833	3.49665	3.70167	3.37036	3.50582	3.45525	3.36666	3.44428	2.99776	3.38279	3.39201	3.61574	3.16696	3.2707	3.31671	3.54145	3.55149	3.56789	3.79927	3.52263	3.18889	3.46337	2.92218	3.44312	3.73656	3.34134	3.07615	3.24618	3.22565	3.44331	3.63101	3.16653	3.05649	3.23125	3.13183	3.17104	3.1316	3.23434	3.27365	3.43967	3.11774	3.10126
AARS	9.62699	9.68765	8.31244	9.1991	8.2366	8.93541	8.71314	9.47196	9.24383	9.21961	9.54401	8.59156	8.90159	9.15793	9.01078	9.36389	8.68245	8.73471	8.76475	8.79617	9.03024	9.20456	9.43522	8.97173	8.70955	8.91635	8.70506	8.07114	8.56263	9.58816	9.16721	9.90673	8.81621	8.70096	10.1482	9.18994	9.71131	8.81021	9.3346	8.58306	9.30716	9.27724	9.14255	8.86095	8.96269	10.007	8.7064	8.85081	8.90598
AARS2	6.5045	7.16285	6.98319	6.59102	6.93956	7.431	6.81154	6.91844	7.47997	7.05039	6.6954	6.49884	6.50157	6.33728	6.95635	6.99963	6.69258	7.10329	6.45655	6.89482	7.0998	7.00686	6.9148	6.33716	6.93429	7.13946	6.44939	7.09048	8.28448	7.41327	7.25611	7.70401	8.76161	7.37167	7.50915	7.64617	7.26075	7.93327	7.31089	7.23091	6.9291	7.47409	7.17282	7.2525	6.84762	7.62987	7.13361	7.69479	6.87006
AARSD1	6.62351	7.88904	6.84084	6.4942	6.86778	7.40186	7.90432	6.8172	7.01198	7.28275	7.09884	6.44988	6.72343	7.06305	6.47914	6.29196	6.18206	6.87171	6.86423	6.68498	6.79458	7.30104	7.46113	7.69473	7.03337	6.81492	7.02658	6.98813	7.29495	6.76345	7.03133	6.56774	6.93565	6.72376	7.28237	7.01416	7.29518	7.37838	6.95378	6.90797	6.68485	6.80164	6.91359	6.41103	7.47051	7.36346	7.14414	7.04278	6.97762
AASDH	8.18034	5.9091	5.82362	7.14312	6.91829	7.31283	7.14087	7.65242	7.5626	7.10719	6.94644	6.86624	6.45466	6.89213	7.05745	6.1132	7.23786	7.96341	7.28105	7.25424	7.33208	7.44951	7.90279	7.4371	7.09884	7.07819	6.74436	5.4284	5.13119	6.16827	6.76681	6.81381	6.695	6.37587	7.1013	6.28389	7.75167	6.17483	6.93624	6.45426	6.86105	7.03744	6.87533	5.50402	6.51034	8.1039	5.99142	6.31998	6.85066
AASDHPPT	10.6141	10.8356	10.6508	10.2212	11.0083	10.0909	8.90608	10.5001	9.76024	10.6084	9.56337	10.9302	10.6285	10.7327	10.7644	9.88118	10.4306	10.5964	11.0015	10.1781	10.075	10.7204	10.7595	10.6505	11.2564	10.4684	9.48537	7.65387	9.96637	10.9967	9.62523	9.47803	8.57231	10.5222	10.0133	10.5441	10.3037	10.0864	10.0273	10.1458	9.98574	9.45327	9.47408	9.98626	10.5212	9.63113	8.96476	9.43673	10.104
AASS	7.14112	6.70454	8.42619	6.93071	7.37343	8.26722	7.1778	7.62463	8.57169	7.37635	6.84228	7.80915	7.32289	6.42847	7.62191	6.72718	7.1379	7.43812	7.56506	7.51982	7.76259	7.45197	6.23658	7.25034	6.76334	6.45651	7.01393	6.55118	6.12981	6.09664	6.20016	6.6824	7.45917	5.53191	6.5861	5.45686	4.7248	4.72503	6.1903	6.57214	6.00629	7.35364	5.25399	5.72173	5.50249	6.85946	5.70949	5.09024	6.51446
AATF	7.90638	8.62218	7.50775	7.58322	8.0687	8.21079	7.92904	8.21419	8.44267	8.23101	8.38767	7.96061	8.20352	8.12725	7.76055	7.2246	6.97171	7.63378	7.71051	8.14804	7.7025	7.52133	8.6292	8.25138	8.31283	8.11188	8.33453	8.37943	7.0489	7.83296	7.9484	8.24906	7.94075	8.54035	8.51984	8.73631	8.18964	8.69727	7.98299	7.03617	8.09744	7.76035	8.25095	7.72349	8.40246	7.86185	8.93198	7.85264	7.43678
AATK	6.53426	7.04552	7.57323	6.86673	7.58522	6.89035	7.29158	6.87578	7.30571	7.93041	6.89337	7.27269	6.96584	6.93323	6.81318	7.78593	7.93496	6.76994	7.43428	7.10304	7.44342	6.75672	7.78231	6.90418	6.89637	7.20414	8.99458	7.06743	8.02214	7.47727	7.5805	7.36141	6.803	7.84645	7.1496	7.5288	8.25957	8.04266	7.79105	6.86491	8.93482	6.82913	7.80406	6.81182	7.40407	6.6626	6.95494	7.38586	8.45714
ABAT	12.1606	9.85121	10.8465	10.1976	11.4754	9.43466	5.40994	10.765	11.0896	10.6748	9.50986	10.0042	11.803	10.3302	11.5071	7.98389	9.186	9.3343	12.3051	10.8353	11.0519	10.6863	11.0415	10.2214	10.0401	5.40222	8.96887	10.009	11.017	11.0654	10.158	10.345	9.74382	10.5054	10.0699	10.901	11.2851	10.9991	11.2676	9.34182	11.7608	10.9873	10.7404	10.0221	10.7824	10.351	2.62782	10.4601	11.6645
ABCA1	10.3935	6.39885	9.76485	9.42831	7.91767	8.84061	9.10865	10.554	9.18129	9.47516	9.61728	8.9706	9.67997	8.66152	9.25462	7.17107	9.03045	8.49962	8.81347	9.57032	8.34879	9.61129	8.57171	9.65809	7.79422	10.8143	7.82097	5.07513	6.91665	7.6309	10.1464	10.1607	6.93672	8.10966	9.28551	7.34808	7.24437	7.4083	9.36574	8.86674	8.43749	8.06909	9.24226	7.64804	7.58311	9.06371	9.34877	6.90334	7.54126
ABCA11P	6.69517	6.68275	5.38003	5.85822	6.30193	6.05161	5.7375	6.03447	5.88245	5.87309	5.85541	5.94315	5.85994	7.07869	5.42692	5.90243	5.60081	6.63663	6.94087	5.80828	6.20918	6.60581	5.56545	6.92486	6.68361	5.8381	5.83511	4.98862	6.26667	6.82219	6.55461	4.44823	6.14625	7.06453	5.2484	6.24731	5.38051	5.3306	6.26263	6.18206	5.6552	5.14394	6.04823	5.94806	5.86351	5.43622	4.30021	5.73135	5.95291
ABCA12	2.90348	2.6833	2.74602	2.7741	2.46331	2.60364	2.74356	2.7227	2.52361	2.72595	2.71737	2.74532	3.17847	2.98147	2.57818	2.64767	2.65573	2.7062	2.8304	2.62403	2.56104	2.62841	2.64197	2.77848	2.74666	2.60841	2.83068	2.60897	2.95377	3.00077	2.87916	2.71989	2.5709	2.57609	2.71308	2.63264	2.639	2.65258	2.79028	2.68361	2.60063	2.71631	2.66193	2.80053	2.59045	2.69902	2.85519	2.89211	2.66122
ABCA13	2.59651	2.62348	3.20466	5.50267	2.39255	2.48454	6.61495	2.54372	4.14742	4.94936	4.63707	3.72906	2.49783	2.77183	3.18292	2.48349	3.32383	2.54454	2.79952	2.76669	2.57936	2.52904	2.49943	2.56231	5.63076	3.03865	2.99375	2.60695	2.58921	2.62254	2.44456	2.91579	2.5638	2.78957	2.65758	2.31621	2.59195	2.6736	2.64035	2.56649	2.51556	2.72296	2.62888	2.69991	2.48473	2.57469	3.8599	2.75657	2.45131
ABCA17P	5.30124	4.9836	4.83192	6.51048	6.23336	4.46221	4.24968	4.70734	4.84054	6.00463	4.70211	5.99374	5.18393	4.59265	4.72491	4.67198	5.02848	6.06754	5.09489	6.2639	5.55921	4.92499	5.76845	4.7725	4.30175	4.97288	4.6748	4.86422	5.5071	5.80524	5.10676	6.45836	5.14733	5.29955	4.35474	4.61698	5.043	5.00006	5.00007	4.32051	5.39278	3.99629	4.69689	4.48884	4.75329	4.25572	4.66247	4.61919	5.37204
ABCA2	5.23209	4.57486	5.93152	5.32036	5.13939	5.30028	4.82614	4.79016	5.3289	5.5846	4.62181	5.67917	5.02712	5.11225	5.46931	5.06454	5.07501	4.71908	6.13747	5.65548	5.37889	4.53383	5.91813	5.3918	4.84831	5.69265	6.51731	5.25102	7.43251	6.28647	6.91565	6.26658	5.99407	7.10881	6.68713	7.02112	6.89093	8.43591	7.31489	6.25923	9.72311	6.11736	7.53835	6.15827	7.1116	5.42023	4.57217	7.16087	7.27055
ABCA3	7.40051	7.99041	8.02422	7.27055	7.99395	8.25593	6.55078	7.20208	7.93561	8.12623	7.76362	7.80866	7.51038	7.03754	7.29672	8.02908	6.99044	6.85562	7.60064	7.61372	8.48673	7.41575	8.10364	7.11733	6.96356	6.7744	7.57351	7.84946	8.98714	8.13884	7.31125	8.83236	8.75047	7.98836	8.03991	8.48623	8.06258	8.27531	8.2078	7.00388	7.98218	8.20591	7.74424	7.77485	8.39068	7.05777	6.09367	7.99893	8.05142
ABCA4	4.28214	4.40933	4.4532	4.33171	4.70784	4.35196	5.78708	4.29008	4.34564	4.63258	4.28174	4.44202	4.37068	4.09243	4.46489	4.96761	4.68353	4.45711	4.13437	4.53619	4.3177	4.66467	4.38435	4.68758	4.44446	4.78467	5.14303	4.82095	4.44116	4.46937	4.35074	4.82063	4.80645	4.01521	4.13815	4.27022	4.60068	4.7319	4.08984	4.1778	4.42873	4.36594	4.66003	4.42839	4.56914	4.81115	4.52373	4.09318	4.60371
ABCA5	8.83919	8.26387	5.87245	7.97567	7.32731	5.36086	9.35113	6.77998	6.87258	4.85426	4.94858	7.3449	7.63405	7.31794	5.11833	5.37208	6.34873	8.62808	7.69417	7.8972	7.73474	7.8408	7.65764	8.70904	8.18778	6.90077	7.88752	7.84084	7.96412	8.00423	9.33374	7.55824	4.73806	6.25512	6.30876	7.17743	7.15272	6.19564	7.55563	7.66116	6.51831	4.18535	7.1988	8.17434	6.40241	4.63167	6.91003	6.4034	7.16663
ABCA6	3.16806	3.25705	2.92645	2.96999	3.12151	2.78092	6.47795	2.70571	3.0344	2.94908	2.66909	2.95194	2.92928	2.59632	2.99067	3.09826	3.41913	2.8807	3.29005	4.99801	2.99274	2.81558	2.74642	2.97888	4.62863	3.07806	5.18849	3.60918	2.93501	2.88386	4.39112	2.76238	3.13037	2.68744	2.70323	2.98583	3.78888	3.73145	3.05955	4.15824	4.78804	2.85825	4.39224	2.65335	2.8826	2.80796	3.22719	3.27018	3.69174
ABCA7	5.41524	5.58014	6.03566	5.74741	5.35936	5.70642	7.57572	5.53387	5.43583	5.82111	5.29514	5.58055	5.27577	5.35351	6.00798	5.32503	5.69144	5.80594	5.82344	6.02025	5.86199	5.66044	6.7077	5.39665	5.92838	5.65622	6.35907	5.94565	6.15901	5.11391	5.5814	5.63573	5.3681	5.30803	4.97603	5.46026	5.55873	5.67558	5.33933	5.01811	5.52204	5.09241	5.38611	5.72077	5.24311	5.02299	6.34829	5.78899	5.54899
ABCA8	7.08787	4.69207	4.078	8.74486	6.69589	9.04211	9.14497	8.32517	5.20001	7.10049	3.71539	7.8499	4.86707	2.98435	9.69675	3.49994	9.68103	9.07928	7.55962	8.88043	5.51016	3.41334	7.73282	8.47302	9.70614	8.80142	9.5182	9.11632	4.44321	4.91785	9.6579	5.74012	4.41844	6.62958	5.85066	6.49929	6.89718	8.15869	5.70267	7.76629	9.85679	5.58298	8.1464	6.11969	3.71908	3.93094	3.63932	5.83832	8.2584
ABCA9	2.81984	3.09753	3.66314	2.85878	2.77651	2.7734	5.12462	3.60565	3.19163	2.91351	2.69187	3.05229	2.82681	2.75016	2.94542	2.77096	3.21463	3.10182	3.44957	3.58524	3.17784	2.87884	2.95818	3.08716	4.40445	2.70662	4.64332	3.79525	4.33054	2.907	4.098	2.62838	2.99929	3.11438	2.9466	2.98583	3.82152	3.51737	2.8621	4.70532	3.6056	3.02005	4.83392	2.98666	2.95165	2.85105	3.02005	3.15171	3.74627
ABCB1	7.46214	5.30375	4.3122	6.12981	7.15563	6.55118	4.7253	5.58863	6.13009	5.80543	4.87257	6.08642	6.39206	6.02515	7.80969	5.05451	7.21621	3.5064	6.73799	5.15999	7.30867	5.44096	5.10491	3.67025	7.41943	6.01741	5.58861	4.20452	6.17234	7.14658	6.10105	3.46839	5.26381	5.66189	5.79234	6.936	6.84809	5.15368	6.40915	5.77585	6.8836	5.0087	7.18255	3.43635	4.07253	4.69132	4.61485	5.31199	6.60714
ABCB10	7.07637	8.41734	5.97963	7.34612	7.69034	7.50043	6.33813	8.40085	7.0127	7.21116	7.56304	8.24388	7.76856	8.32519	7.49276	6.83205	7.3841	7.75871	7.39985	6.97247	6.76071	8.18032	6.84471	8.14624	7.31068	6.33744	6.96549	6.95384	5.20275	7.56454	6.77381	6.42	7.22896	7.8142	7.31251	7.30605	6.861	7.00277	6.88737	7.03023	6.42311	8.04327	6.51049	9.014	6.90525	6.70653	6.99695	7.67922	7.038
ABCB11	4.65234	4.46879	4.33566	4.5513	4.43503	4.38878	4.51575	4.27854	4.78981	4.28257	4.57034	4.52666	4.67896	4.37569	4.36487	4.90612	4.83305	4.65288	4.3715	4.48482	4.48668	4.34329	4.2903	4.65712	4.33033	4.45083	4.69476	4.85859	5.15166	4.26667	4.43459	4.36613	4.27208	4.37277	4.20183	4.20562	4.68735	4.44645	4.17834	4.27004	4.41638	4.56199	4.11722	4.17211	4.19867	4.48579	4.29198	4.37449	4.47305
ABCB4	6.53855	6.42139	4.67902	5.22266	7.42529	7.33849	3.91996	7.09546	4.80976	4.52914	5.12132	5.19341	4.85833	4.97381	6.10758	4.09197	6.14303	3.79855	4.45636	3.93266	4.89962	4.3881	5.48001	3.85711	4.77839	6.2389	5.27873	6.96785	4.59401	7.15688	4.55201	6.02238	4.55218	4.39766	7.50139	6.81478	6.32963	6.57623	5.98375	6.26685	4.24931	5.33146	5.98395	3.408	4.54579	5.87765	5.69682	6.80461	3.63861
ABCB5	4.59775	4.58978	5.04232	4.72955	4.6694	4.55554	4.95789	4.917	4.8018	4.49653	4.69546	4.7702	4.45289	4.52605	4.82198	5.7039	4.7159	4.46465	4.282	4.45891	4.82936	4.54664	4.66718	4.94318	4.60318	4.71193	4.73853	5.18339	5.18224	4.73474	4.83801	5.10526	4.85895	4.77053	4.65335	4.6817	4.42528	4.7329	4.28238	4.6269	4.61866	4.42323	4.43083	4.27126	4.63339	4.51392	4.67619	5.11997	4.90309
ABCB6	6.98182	7.19526	6.81131	6.8673	6.86176	7.73594	7.91274	6.91844	7.59877	7.77679	7.40331	7.21681	6.51209	6.86123	6.46622	8.37391	8.1716	7.50491	6.29396	6.6501	7.13219	7.04736	7.86633	7.09881	7.49192	7.08426	6.66756	8.44017	7.04956	6.70738	7.37118	5.92373	7.7254	6.90281	7.48735	7.96598	6.8383	7.35147	6.72601	6.47764	6.69978	7.22929	6.57972	7.56953	8.45162	7.20884	6.69993	7.31586	6.73219
ABCB7	8.66325	8.60046	8.90976	8.6069	8.60139	9.53168	9.03641	9.06539	8.73489	9.23309	9.27474	9.3248	9.9973	9.80831	8.65364	8.79817	8.38266	9.46531	8.70867	8.51579	8.49839	8.86314	8.57603	9.60994	8.72003	8.68592	8.77679	8.46931	7.15184	8.13237	7.96278	7.87418	8.50239	7.59148	8.41684	7.78151	7.82947	8.00578	7.76458	8.01012	7.63885	8.48771	8.13636	8.63394	8.53664	9.03624	8.62094	8.14237	7.61212
ABCB8	4.43132	4.36594	4.56947	4.46045	4.38779	4.67518	4.73964	4.60324	4.67386	4.59017	4.7705	4.52304	4.57182	4.62794	4.12594	4.65255	4.50127	4.52986	4.56681	4.55019	4.58245	4.58462	4.7633	4.88457	4.6107	4.61133	4.42713	6.39077	5.21833	4.73988	4.98918	5.38761	6.06222	5.22611	5.27462	5.24241	5.2039	5.42191	5.01161	5.19488	5.50279	4.91862	5.2143	5.98618	5.1193	4.78191	5.84345	5.73897	5.26173
ABCB9	5.26586	4.6455	5.20509	4.91802	4.26363	5.86585	6.10624	5.53941	4.67425	5.3514	5.10148	4.14656	4.59428	4.76151	4.83513	4.98199	5.4346	5.31178	4.66291	4.63275	4.43154	5.18646	4.87432	4.18924	4.0818	4.6852	4.85372	6.84528	5.2566	4.92588	6.53762	5.22467	5.74177	5.47011	5.416	5.52274	6.10398	6.25687	5.18511	6.724	6.31991	5.0467	5.60077	6.65738	6.56885	5.46037	6.76886	5.37799	6.59873
ABCC1	7.27238	7.62233	7.07041	7.53166	7.40493	7.70869	8.05336	7.74598	7.98808	8.4745	8.41979	8.05867	7.36894	8.39374	7.5198	8.51317	6.11062	8.29724	6.70967	7.50324	6.50634	8.11167	7.80349	7.83931	8.07107	7.79776	7.8078	8.15603	6.88107	6.59605	7.5514	8.32362	7.90362	7.43724	7.232	8.19733	6.50672	7.05457	7.1117	6.5176	6.53514	6.96459	7.13012	7.7183	6.73219	7.18292	8.28637	6.49431	6.04561
ABCC10	7.31229	7.43819	7.76625	7.0696	7.09	7.66415	7.56469	7.03353	7.78125	7.63282	7.45977	6.95667	6.5687	6.96431	7.22661	7.10467	7.09887	6.82418	7.22226	6.84753	7.99133	7.02523	6.97051	7.17908	7.44094	6.84025	7.54125	7.92486	8.09079	7.23852	7.39787	7.22196	7.47805	7.33379	7.10142	7.18442	6.4004	6.53519	7.09141	7.54537	6.35326	7.49525	7.0965	6.25416	6.27606	6.89022	7.69569	6.52402	6.42511
ABCC11	3.01249	2.71653	2.87893	3.01112	2.84387	2.9021	3.00876	2.91256	2.92049	2.8871	2.8051	3.02257	2.95104	2.9622	3.18556	2.86836	2.6497	2.92035	3.02765	2.90126	2.91167	2.96319	2.87776	2.91916	2.89605	2.8989	2.99991	3.31979	3.29522	2.85869	2.95311	3.42809	2.98089	3.03952	2.76295	3.21596	2.83871	3.44431	2.86011	2.70099	3.25827	3.35867	3.00949	2.9134	3.03058	3.34605	2.99752	3.00684	2.94615
ABCC12	3.67271	4.12519	3.35374	3.35518	3.18594	3.84832	3.87752	5.21488	4.19084	3.17233	5.42791	3.15578	3.03571	3.36732	3.02911	4.45704	3.44116	3.16704	3.19187	2.9904	3.38388	3.57442	3.13748	3.20095	3.18366	3.15484	2.98439	5.94266	4.03541	3.29108	4.29209	3.56963	3.71851	3.32149	5.68646	4.37496	4.00702	3.7303	3.38891	3.00497	3.03517	7.53456	3.21412	2.9693	3.68671	6.18875	3.53399	5.51961	4.33315
ABCC13	3.20574	2.91753	3.12162	3.87552	2.72042	2.92261	2.95747	2.79267	2.85411	2.71252	2.86436	2.94146	2.9274	2.75736	2.9483	2.96104	2.9483	3.14435	2.78902	3.1031	2.9096	2.96038	2.97428	2.96112	2.86372	2.89971	2.8554	3.42739	3.34167	3.22412	3.21899	3.40589	3.23811	2.84418	3.11209	3.18359	2.93345	3.81997	2.9626	2.7821	2.98996	3.2294	3.00082	2.98472	2.93704	3.40287	3.0152	2.82859	2.94578
ABCC2	3.58781	3.70759	3.65732	3.70437	3.50069	3.57664	3.73681	3.85151	3.94183	3.40023	3.64463	3.67974	3.52299	3.55286	3.65208	3.8075	3.66695	3.63759	3.43345	3.51434	3.71039	3.68056	3.53677	3.56522	3.49692	3.75262	3.47125	3.68971	3.63174	3.40467	3.7752	3.93401	4.09996	3.4607	3.71075	3.38117	3.36751	3.94041	3.40423	3.47739	3.7261	3.4475	3.63123	3.62455	4.10626	3.90058	3.7531	3.89487	3.45743
ABCC3	5.98898	4.51901	8.44678	6.77929	5.35054	6.00051	9.04699	5.03088	4.85112	8.0285	5.34543	6.46912	6.4309	6.08658	7.48132	6.09571	7.15702	6.55158	8.19295	8.31439	9.19528	5.20947	9.16715	5.66821	4.89835	7.70765	6.82829	5.43835	5.39904	4.46555	8.62192	6.27087	6.68815	7.34843	5.95292	4.47952	5.00155	4.43409	8.53807	7.60402	4.9628	4.58595	5.72372	4.62143	5.95051	4.75588	4.92029	5.00441	5.31317
ABCC4	6.42111	7.32877	5.1015	7.78297	7.33571	6.43957	6.08966	6.25858	4.81146	7.63884	6.437	8.52519	6.91345	8.83926	6.7801	5.47848	6.3514	6.46262	7.06869	6.41517	6.17437	7.1705	6.94597	8.29115	6.37211	6.89538	6.02363	4.74029	5.86363	6.37816	5.91888	6.31219	3.50098	6.88177	5.82867	7.19281	6.11412	6.21377	6.76851	6.0883	6.41684	3.38939	5.83524	5.81817	6.7392	4.71409	6.98894	5.47972	4.66391
ABCC5	7.26849	8.37877	7.74186	7.02326	7.6914	7.90178	7.07322	6.80611	8.37128	7.69063	7.45564	7.8288	8.29679	7.35229	7.67442	7.64295	7.83864	7.21285	7.92758	6.83512	9.22275	7.07444	7.44034	7.76198	6.90465	6.70636	8.49745	6.56139	7.6375	8.07986	7.63344	7.64255	7.51599	8.50645	7.99042	8.12259	7.72055	8.60536	8.236	7.92869	7.44764	7.35286	8.26512	7.02302	8.02951	7.44391	5.91217	7.91593	7.67292
ABCC6	7.38307	5.03023	5.65997	6.44462	7.1637	6.32841	5.79589	4.35074	4.85089	5.43799	7.79738	5.19292	5.22611	5.04681	7.3948	5.2059	6.69937	7.11537	6.443	5.61208	5.94456	6.87888	5.73434	5.89811	7.16383	6.28515	5.24906	6.56538	6.713	5.89625	5.58261	5.78856	4.73549	5.30478	5.57048	6.31989	5.5786	4.84694	6.12413	4.67034	5.87054	4.42347	5.39646	4.83939	4.59441	4.2376	4.31116	5.40385	5.19891
ABCC6P1	3.18451	2.88696	3.36282	2.97679	3.57919	2.99822	3.10907	2.64575	2.90175	3.24257	3.12166	2.85915	3.20425	2.95566	3.17068	2.99974	3.11871	3.16544	3.85173	3.59036	3.90913	2.7674	2.86561	2.93824	2.89351	3.01249	2.86466	3.02916	3.35062	3.36159	2.72143	3.19291	3.04496	2.90731	3.33422	2.84389	3.18989	2.80059	3.22229	2.89438	2.8919	2.98295	3.06628	2.74693	2.88297	3.03849	2.82321	2.92091	2.95915
ABCC8	5.04502	5.70049	6.14035	5.98108	6.07616	4.77549	4.97902	5.53435	6.21525	6.08445	5.23517	5.57784	6.03148	5.19979	6.54911	5.31188	5.74678	6.23451	7.11299	6.09792	7.37319	5.20825	6.90708	5.09856	4.77868	5.06654	5.18053	5.67922	6.12502	6.87292	5.20924	5.32473	5.52268	7.74132	6.0955	6.09704	7.47985	6.43333	8.07617	5.91203	6.47857	5.30562	6.15171	4.55109	6.85871	4.44335	5.37445	6.96817	7.33064
ABCC9	3.49955	2.57128	2.65907	5.13398	4.36411	2.88814	3.13273	2.78156	2.89822	3.19706	2.88567	3.57003	2.91909	3.85523	4.40051	3.51256	2.92915	4.59842	2.7309	4.34038	2.97998	3.18408	3.29293	2.90843	3.13952	2.86581	3.76203	2.5818	3.36253	3.10348	2.96442	3.36192	3.08743	2.62845	2.89508	3.83588	3.34554	2.88232	5.04837	2.91684	4.45357	3.09503	4.12798	3.26865	2.90206	4.6042	3.81385	2.6833	5.55452
ABCD1	5.03212	5.45676	5.85697	5.25724	5.23831	5.32069	6.16521	5.55295	5.35361	5.54398	4.91782	5.71932	5.28102	5.52907	5.36673	5.78987	5.14861	4.79949	5.19873	5.37008	5.22076	5.37933	5.53739	5.50412	5.57543	5.46929	5.82682	6.4962	6.20639	5.18218	6.4332	6.64035	5.97186	6.04221	6.04714	6.02818	5.75571	6.31026	5.62498	5.2664	5.77103	5.90649	5.85276	6.02394	5.60557	5.15424	6.28011	5.31986	5.95221
ABCD2	4.93153	2.56316	3.4547	3.13341	2.72042	3.54027	2.6482	3.71485	2.85704	2.70346	2.51813	2.53198	3.40893	2.61207	3.10367	2.53017	3.15251	2.47298	3.44719	2.4217	2.58592	5.88404	2.45859	2.79877	2.50013	2.38082	2.50991	2.56423	2.366	2.5258	3.77231	2.52725	2.71138	2.54787	2.69316	2.47842	3.50724	2.41804	2.94098	2.54759	2.85292	4.08949	2.43447	2.38654	2.40829	4.61973	2.27292	2.56698	3.94685
ABCD3	5.18834	3.87674	3.34433	4.23209	5.10822	4.82729	4.93284	4.9068	4.19411	4.39374	5.04264	4.66644	5.65341	5.81186	4.95436	4.0604	4.77271	4.56157	4.65136	3.5923	4.05926	5.74132	4.6065	4.94196	4.23236	4.09451	3.94838	4.33556	3.80835	6.59015	4.32305	4.15114	4.7489	5.62837	4.57871	4.40896	4.65894	3.99125	5.41364	7.44294	5.91287	5.81264	4.80257	6.87663	6.79276	6.98884	5.47926	4.43989	4.96132
ABCD4	6.89419	6.87844	7.49931	6.81021	6.60583	8.2981	7.89929	7.65453	8.73944	7.76446	7.87079	7.31703	7.96074	7.3275	7.17841	7.51929	7.42863	7.08435	7.80617	7.53035	8.52153	7.58033	7.6175	7.5084	7.1203	7.62897	7.68127	7.92007	8.25562	7.9352	7.72727	7.81403	8.14426	8.04576	7.33445	7.34394	6.93872	7.84052	8.13235	8.40931	7.66036	7.84401	8.02412	7.31857	7.72862	7.48236	7.35997	7.05665	7.11416
ABCE1	9.19237	9.35936	7.91353	8.96015	8.97169	9.26572	8.77266	8.34461	7.83622	9.20376	9.2869	9.26567	8.84686	9.46076	8.31159	10.4065	9.10604	9.25919	8.2734	8.63425	8.30541	9.44854	8.59787	9.61082	8.53818	9.64708	8.36672	7.90672	8.06297	8.1482	8.01328	7.44114	7.97916	8.83281	9.12189	9.04035	8.23696	8.50608	8.45139	8.2413	8.14109	7.77496	8.71624	8.46315	9.76863	8.40937	9.32223	8.94921	7.80362
ABCF1	8.29279	9.10546	7.51354	8.07047	8.52082	9.32533	8.79167	8.53261	8.66886	8.92702	9.2416	8.14539	8.00096	8.27788	7.86293	8.94643	7.53873	7.93498	7.82715	8.26743	8.49709	8.09901	8.76364	8.24456	8.52589	8.13348	8.2563	8.67745	7.1319	8.42746	8.07842	8.80886	9.01719	9.11049	8.94195	9.07448	8.04266	8.66819	8.54464	7.78095	8.31569	9.08901	8.75491	8.53642	8.99716	8.70012	9.16436	8.32267	7.85645
ABCF2	6.08231	6.39119	4.88422	6.06112	6.26917	6.67636	6.09996	6.46741	6.05931	6.18776	6.61127	6.82713	6.80886	7.46027	6.31498	6.85927	5.61388	5.87547	6.22637	6.69473	5.22183	6.56556	6.12467	6.74953	5.81601	7.2011	4.97046	7.25333	5.45044	7.45219	7.33142	7.90202	6.70034	8.01742	7.52626	8.13858	7.20179	7.33042	7.74269	7.34882	7.37207	7.52739	6.93834	8.35748	8.50887	7.68072	8.682	7.37158	6.45739
ABCF3	6.70585	7.33337	7.01009	6.50258	6.63474	7.46725	7.39496	6.33042	6.98417	7.07208	7.30684	6.83107	6.87205	6.32943	6.4815	7.30947	6.9865	6.5597	6.93402	6.89309	6.97123	6.28333	6.62756	6.82114	7.0431	7.36943	6.97458	7.83403	7.15213	6.71181	6.82926	7.7302	7.69355	6.97575	7.39949	6.9001	7.14303	7.08096	7.13358	6.8061	7.29086	6.68481	7.06967	6.57192	7.36691	7.42623	6.90676	6.75826	6.64507
ABCG1	8.04158	6.58062	7.56657	7.35904	7.21905	6.6148	7.4407	5.88824	6.86511	7.85866	6.98071	7.51246	7.82682	7.16499	7.39264	5.11657	5.80621	6.14275	8.30607	7.92893	6.91651	5.28807	7.02183	7.96009	7.56455	7.64959	7.87451	6.33999	5.97514	8.7129	8.15639	6.28285	4.94329	6.73954	7.59694	7.4736	6.35908	7.36878	7.08183	6.32487	7.70644	5.87398	7.38915	4.65715	7.68559	4.72659	4.95393	5.7199	5.17967
ABCG2	7.59917	7.5725	6.55126	8.10027	9.35099	7.55273	6.67475	7.44552	8.25577	7.45729	6.29483	7.88627	8.66044	7.62483	9.852	7.36224	8.27065	6.81387	9.08674	6.73642	9.32902	7.51693	7.09244	5.9493	10.1603	5.75292	8.73989	6.20497	6.92473	7.1535	7.58255	6.2196	6.24542	7.31305	7.7279	8.85214	8.47451	7.46575	8.52118	7.9505	8.74498	7.13079	9.27018	5.04692	7.47844	7.16723	5.58147	7.03072	7.77022
ABCG4	5.35792	5.39549	5.64669	5.262	5.14589	5.19692	5.67876	5.10376	5.37332	5.31274	5.20411	5.13217	5.42491	5.0554	5.049	5.25755	5.20872	5.01247	5.2302	5.23188	5.44806	5.33692	5.45286	5.24279	5.2848	5.22595	5.39403	5.8683	5.76086	5.85345	5.31251	5.99855	5.38579	5.42193	5.38361	5.71067	6.58453	5.48287	5.4587	5.23741	5.60142	5.25207	5.44061	5.39851	5.41753	5.20543	5.5214	5.94856	6.46198
ABCG5	3.38962	3.26198	3.19331	3.33561	3.32968	3.18033	3.38677	2.93679	3.15058	3.31776	3.32437	3.58454	3.30886	3.27961	3.43421	3.93457	3.27227	3.42266	3.45755	3.31237	3.32107	3.28571	3.1606	3.32931	3.21915	3.28489	3.18079	3.69685	3.67268	3.13554	3.59097	3.31349	3.26513	3.23946	3.27177	4.01998	3.63147	3.57776	3.07965	3.00953	3.12503	3.57695	3.2339	3.26927	3.56126	3.13123	3.3311	3.24267	3.28329
ABCG8	3.60142	3.76584	3.71138	3.43421	3.77305	3.62562	3.78283	3.84276	3.90712	3.64888	3.84323	3.68863	3.57945	3.78139	3.71778	3.75449	3.42603	3.74698	3.68265	3.72934	3.41292	3.71873	3.94315	3.58465	3.38616	3.79602	3.45497	3.98208	3.85316	3.0805	3.62824	3.82503	3.99645	3.91028	3.72975	3.83745	3.87648	3.63723	3.42768	3.82387	3.51438	3.98149	3.40226	3.80895	3.66021	3.96509	3.70794	3.5265	4.01972
ABHD1	3.54006	3.51638	3.86316	3.53317	3.56649	3.49094	3.45634	3.33371	3.82211	3.51612	3.6529	3.81393	3.71598	3.4931	3.693	3.87247	3.71691	3.62438	3.90868	3.69931	3.62919	3.53317	3.44353	3.62794	3.26813	3.50397	3.76294	3.68047	4.06503	3.65899	3.96424	3.95822	3.94555	3.62296	3.49591	3.62038	3.94307	3.99869	3.72148	3.43072	4.00602	3.66177	3.39383	3.56649	3.53331	3.55048	3.91173	3.61124	3.95398
ABHD10	7.80734	7.45186	5.18214	7.23441	6.99523	6.37341	5.31577	6.53745	5.70931	7.51141	6.61831	7.0921	7.79073	7.64861	7.17886	6.30516	6.11692	8.12831	7.02213	6.39464	5.69443	7.64084	7.19561	7.97937	7.67666	7.06763	5.50756	3.83179	5.48479	7.03799	5.32835	5.14508	4.80483	6.97925	6.74831	6.24175	6.49795	6.12947	6.7949	6.88359	7.14747	5.50245	6.41195	7.54613	7.73297	6.86612	7.08568	6.21661	6.2149
ABHD11	7.10334	6.68011	7.62588	6.97866	6.93646	7.19069	8.14853	6.60169	6.73312	7.65946	7.12005	7.35924	7.22775	6.95602	7.35187	7.18158	7.22507	7.56268	7.1502	7.24674	7.18407	7.09794	7.23933	7.04113	7.01834	8.2885	7.23814	8.11939	7.4632	6.76755	7.31995	6.92263	7.77791	6.48035	7.06497	7.09138	7.64479	7.18773	7.01274	7.24004	7.27754	6.44715	6.77505	7.16745	7.06802	6.63746	8.21883	7.11081	6.94743
ABHD12	7.37509	7.08307	8.14847	6.43992	7.67152	7.08722	8.04561	7.10042	6.07952	7.80348	7.85019	7.21579	7.93889	7.20031	7.4788	5.60075	7.51225	5.90634	8.6581	7.75612	8.82078	7.58055	8.28062	6.81737	8.69315	7.30995	6.83913	7.12554	8.25879	8.70093	6.24607	8.16251	6.92391	5.74393	6.78558	8.05466	6.79304	8.51728	7.76218	6.89374	8.1345	6.65377	6.8152	7.86946	6.47452	7.14788	6.44412	8.57724	7.18877
ABHD12B	2.82053	2.70594	3.01703	2.74734	2.86666	2.60713	2.81066	2.65747	2.59755	2.70778	3.44488	2.73986	2.68637	2.70193	2.67078	2.83852	3.05232	2.76852	3.30326	4.70227	5.1016	2.45946	2.77528	2.72781	2.75869	2.76153	3.40197	2.74815	3.12996	3.3237	2.93261	3.33738	3.33742	3.02159	2.91212	3.24065	3.54964	2.84312	3.03833	3.18978	2.87769	2.72615	2.92661	2.71469	2.88774	2.95959	2.88808	2.81158	3.99982
ABHD13	5.52549	4.42603	4.75995	6.74493	6.53263	5.55293	5.14755	8.34354	4.46482	6.00113	5.2022	6.27965	6.25957	8.15098	6.15981	3.03734	5.29976	5.84332	6.9194	6.03194	5.54243	6.33878	5.23916	5.86588	5.4938	5.98025	4.93195	5.32628	5.43516	5.70189	5.50895	5.37968	4.92915	5.45657	5.4986	5.30105	5.94849	5.30969	5.61061	6.99758	5.96164	6.37317	6.20229	5.22804	5.64085	5.18844	5.55971	5.55618	5.46958
ABHD14A	6.76845	8.19501	7.92662	6.6584	7.60427	6.671	6.19319	4.69173	6.80112	6.74229	7.00241	6.65906	6.84141	6.35163	7.08671	6.74536	7.06092	7.58271	7.9983	7.30335	7.25164	6.41613	7.54698	7.98802	7.30472	6.47942	6.79648	7.21437	7.54515	7.91376	7.31206	7.22156	4.68919	8.28746	6.75934	8.48635	8.52737	8.28873	7.62165	6.75096	7.81841	6.24494	7.40232	5.86506	7.99909	4.11585	8.04176	7.96259	8.06302
ABHD14B	5.68071	5.62422	6.57272	6.12485	5.7103	5.7422	6.86241	5.40716	5.79452	5.56532	5.96828	5.85679	5.44346	5.65194	6.01827	5.97364	6.50931	5.72712	6.96343	7.14194	6.27908	5.74523	6.88789	6.55134	6.79203	7.26482	7.00124	6.76911	6.96521	5.48504	7.07199	5.93086	6.356	7.48096	6.78961	7.12747	6.7753	7.15546	6.57292	6.52078	7.07138	5.1011	6.84027	5.3199	6.15182	5.42177	9.31693	6.59431	6.19267
ABHD15	5.25921	4.33471	4.89372	5.4695	5.25548	6.04922	5.79536	5.1918	4.82112	5.61849	6.13316	5.6875	4.94625	5.26763	5.34188	5.08201	4.6905	5.19257	5.86512	5.22364	4.86719	5.66924	5.19651	5.26428	7.38096	5.73407	5.01581	5.4279	4.52462	4.97738	6.18126	5.38353	5.67994	5.35194	5.29414	5.05228	5.49491	4.85763	5.68571	5.36484	5.32529	4.92279	5.13989	5.27499	4.57463	4.84818	5.63905	4.42598	4.90423
ABHD16A	7.7099	7.51891	6.68661	7.92271	7.60065	8.00467	6.36922	7.86854	7.68316	7.86263	7.7745	7.60749	7.40085	6.95251	7.1041	7.13553	7.49119	7.62225	7.99902	7.58238	7.46319	7.79475	8.14773	7.79267	8.17182	7.99957	7.24164	7.34189	6.84831	7.66439	7.35523	7.87078	7.17836	7.39424	7.86358	7.324	7.3072	7.34589	7.56624	7.74515	7.43319	7.76429	7.69578	6.91421	7.49157	6.9212	7.46812	6.85139	7.21512
ABHD16B	4.04014	4.37409	4.41833	4.16335	4.30471	4.22362	4.91683	4.28307	3.96763	4.43514	4.15867	4.0734	4.23794	4.20741	4.1082	4.54786	4.0008	4.49446	3.81337	4.20686	4.01939	4.64532	4.28943	4.40683	4.20601	4.36744	4.17853	4.44907	4.50996	3.80718	4.13541	4.25946	4.4614	4.25566	4.38126	4.29191	4.47376	4.40624	4.0155	3.6818	3.99357	3.89726	4.10516	3.74513	4.09164	3.89257	4.2353	4.25207	3.89862
ABHD2	4.10979	3.43742	3.94461	3.73938	4.88243	4.40803	3.49634	4.07843	3.55669	4.33361	5.1381	4.57877	4.49201	4.09792	3.82163	4.05923	4.82701	4.03743	6.45169	5.19119	5.42521	4.27413	4.82124	4.31015	3.8693	4.85925	3.75074	3.99923	4.91632	6.88248	5.46721	5.65511	4.1998	7.92541	7.00914	7.27865	6.31137	4.85077	7.13543	7.36957	8.16597	5.51943	7.48561	6.04033	8.36967	6.39714	7.24234	6.49826	6.45676
ABHD3	7.49209	7.02466	6.76922	7.84319	7.31442	8.27061	7.7584	7.62945	7.61991	7.52464	7.3856	7.78095	7.5319	7.63607	8.20363	7.32338	7.4397	6.43409	8.04888	7.66949	7.16736	8.5514	7.55245	7.33795	8.3184	7.63154	7.49323	7.72263	6.14108	7.7792	7.41914	7.3427	6.84419	6.15406	7.09868	7.13362	7.20056	6.80946	7.00221	6.62512	6.9858	8.21041	7.34402	7.44871	6.27137	9.14596	5.87525	6.75527	6.81304
ABHD4	7.50535	6.94262	8.09424	7.66211	7.1172	7.51421	8.19091	7.22413	8.03231	7.46964	7.52836	8.12195	8.08946	7.46292	7.69244	7.7647	7.57363	7.38097	7.81557	7.62006	7.6435	6.79706	7.37936	7.47933	7.24928	7.6923	7.77314	7.55229	8.0843	7.87926	8.23279	8.02543	7.63155	7.87823	8.82587	7.40671	7.40629	7.59618	8.60611	7.62396	8.0082	6.9586	7.89932	7.02945	7.9158	8.72007	6.75206	6.7691	7.32486
ABHD5	7.32258	6.74022	6.06384	7.13217	7.35949	6.28359	4.9435	6.95253	6.46654	7.06589	7.93458	6.13196	7.13403	6.40015	7.26049	4.13707	6.06439	7.10552	7.22689	7.09411	6.29468	6.91364	6.95956	6.82038	7.29487	7.09307	6.07955	5.09198	5.26228	7.16239	5.12431	5.2796	5.54332	6.63835	5.94509	6.46667	5.88539	5.87843	6.48549	6.95612	6.79113	6.7767	6.06349	6.36936	6.7288	6.64201	4.9831	6.31754	6.26528
ABHD6	5.54636	5.29398	4.02774	5.184	6.0992	5.02232	3.60066	4.27779	4.4556	5.9509	6.59514	5.46948	5.7833	4.57873	5.75301	3.75047	4.50072	5.19093	6.52602	5.2482	4.95894	4.59994	5.6625	4.81825	4.37427	4.77771	4.4501	4.49868	4.299	5.76427	4.44509	5.22295	3.95125	5.86476	5.89015	5.98159	5.89378	5.11484	5.88875	5.6121	7.13756	5.17889	5.44224	4.07289	6.64607	5.13867	5.17461	4.68257	5.22779
ABHD8	4.87385	4.41065	5.48254	4.67161	4.95487	5.54042	4.98703	5.14788	5.33285	4.57902	4.56825	5.18345	4.89911	4.58041	5.14496	4.87505	4.92667	3.98674	5.12448	5.05373	4.78329	4.97763	4.61188	4.55278	5.25095	4.8088	4.6836	6.08545	6.28742	4.56446	6.20126	6.70881	6.85699	5.81979	5.68631	5.56935	6.99529	5.96202	5.88709	5.37772	5.95506	6.2886	5.43243	5.46443	5.14536	6.10699	5.99295	5.37299	6.86055
ABI1	9.09358	8.33072	7.15805	9.35913	8.82599	8.556	7.74676	8.84324	8.42412	8.91809	9.80266	9.13423	8.79143	8.34582	9.54521	8.77167	8.3023	8.73672	9.45268	8.92174	8.18288	7.94835	9.27633	8.6691	8.99356	8.50708	8.11174	7.06977	5.49239	8.23341	7.16655	8.32945	6.35562	8.22057	8.78906	7.42901	8.17581	7.239	8.21216	8.48523	8.61918	8.8487	8.02199	7.23376	8.48214	9.46218	8.35999	7.46678	8.79266
ABI2	3.71123	4.55229	5.66456	3.64541	3.87801	4.2833	4.16414	3.9486	4.849	3.88877	4.20041	3.97078	3.63743	3.57415	4.27667	4.87574	4.28119	3.33481	3.83717	3.70965	5.16081	3.8648	4.39483	3.54472	3.73706	3.81688	4.26845	4.72611	7.28025	7.47738	7.93754	3.86595	7.4779	6.11776	6.63582	6.55576	6.25757	6.39558	6.41571	6.29913	5.28447	7.35373	6.18967	7.85249	5.7479	7.15209	5.46884	7.18854	6.42637
ABI3	6.50465	6.19904	6.79083	6.4942	6.29592	6.4107	7.11473	5.77196	6.30448	6.38406	5.91995	6.83601	6.00016	6.09549	6.40475	6.48039	6.08591	6.13601	6.45955	6.50248	6.37974	5.89669	6.38476	6.27921	6.34215	6.4738	6.71185	6.91931	6.61166	5.89583	7.01603	6.79581	6.60779	6.44269	6.76707	7.08611	6.52978	6.86331	7.33503	6.59276	6.73707	6.38699	7.22171	6.17803	6.50477	6.19661	6.4613	6.6215	6.90353
ABI3BP	10.0796	5.35306	5.41084	9.03537	7.92361	6.17595	5.75212	5.36556	3.72754	7.2585	3.17668	8.11681	3.59192	3.50186	8.50767	2.89932	6.59507	8.42889	8.49023	9.03917	6.47841	3.12009	4.71598	7.5111	5.63491	5.64275	6.89206	2.9853	3.51219	5.24345	6.0564	8.11358	3.49683	3.94396	5.18194	3.94727	5.2716	4.70853	8.96313	4.69135	7.41296	3.4595	4.59783	2.82083	3.19827	2.82855	4.112	4.38141	6.67508
ABL1	7.73922	7.99748	9.3163	8.45093	8.90937	9.15985	8.35942	9.67916	8.98535	8.81916	7.95287	8.79102	9.44234	8.64776	8.21235	8.99804	8.74142	8.64901	8.0664	9.00556	8.61711	9.11959	9.44859	8.97572	8.52917	9.06528	8.83762	7.79083	8.71238	8.2293	8.37005	8.94606	8.57154	8.4878	8.67632	8.69762	8.01053	9.23878	8.65825	8.57012	8.64702	8.84007	9.43922	9.13706	8.41292	8.60072	8.96811	8.64549	7.99944
ABL2	7.09557	8.14737	6.42532	7.21291	7.32801	7.05986	6.30344	7.51526	7.20055	7.21912	7.51888	7.41719	7.45206	7.08943	7.07057	7.09961	6.86666	7.43781	7.07848	7.53379	6.62103	7.0743	7.01591	7.10205	7.31068	7.76778	6.45273	6.90794	6.41744	8.04825	6.92806	7.89964	7.01651	8.11959	7.88674	7.95162	7.43948	7.39045	7.55668	7.62861	7.08157	8.13643	7.89591	7.50993	7.36822	7.54057	8.6652	7.60214	7.44922
ABLIM1	10.3959	8.24707	9.16984	10.0535	10.137	8.87855	7.64262	7.88573	10.1766	9.2764	7.01117	9.91582	9.17042	8.99461	10.8088	9.51221	9.52547	9.50432	10.8006	10.3654	11.022	9.58819	8.52735	9.84278	10.7591	6.97142	9.9006	8.51906	8.60302	9.26462	8.78954	10.3645	8.51619	8.98692	8.81545	9.84664	10.2016	9.01613	10.7723	9.48508	10.2701	8.97635	9.73922	8.43869	9.32789	9.71327	8.97996	10.1978	10.1686
ABLIM2	5.50072	5.78577	4.94089	5.53071	6.00808	4.90532	5.0985	5.54723	5.29102	5.47294	5.26911	5.6177	5.34184	5.44652	5.13682	5.73477	5.50066	5.00552	5.13906	5.3867	5.26893	5.27172	5.48506	5.13826	4.98663	5.13752	5.48379	5.30513	4.9693	5.79279	5.18966	5.82485	5.69329	5.38216	4.81618	5.46793	7.12983	5.20481	5.06504	4.85471	6.53362	5.42735	5.31783	5.04532	4.73199	4.85558	4.9363	5.12499	7.28228
ABLIM3	6.74503	6.91891	7.4578	6.77712	5.69041	4.83618	5.60866	4.55181	5.89465	7.05082	4.61399	5.84383	5.10882	4.27555	7.41899	5.42218	6.25939	6.01125	7.69498	7.31799	7.9588	4.64149	6.50993	4.71095	7.00096	6.69788	7.05245	4.96844	5.27654	5.32987	6.83721	5.91938	4.52755	5.07508	5.08262	6.6654	6.56668	6.16747	7.00083	6.18206	7.63918	4.97557	7.11069	4.75185	5.16542	4.20544	7.5671	6.58851	6.45244
ABO	4.03456	4.02356	4.26925	4.49001	3.96307	4.2434	4.3309	4.09276	4.21947	4.27122	3.87731	3.48056	4.09971	4.1364	4.12359	3.81571	3.81966	4.15331	4.02412	4.08156	3.93509	4.23887	4.02256	4.41247	4.16491	4.39513	4.34617	4.59693	4.94807	4.45289	4.19253	4.60757	4.39426	4.51931	4.00577	4.33836	4.55574	4.05028	4.0461	3.88601	4.45657	4.77726	4.58421	4.13823	4.17304	4.09427	5.18695	5.09659	5.44704
ABP1	3.24939	3.2962	3.16999	3.33121	3.2108	3.23204	3.54851	3.13984	3.06964	3.519	3.18157	3.12098	3.25274	3.44105	3.05575	3.56479	2.99895	3.17163	3.33627	2.96782	3.50493	3.26195	3.31464	3.3825	3.28065	3.30413	3.34859	3.61165	3.19151	2.99562	3.08719	2.86868	3.22108	2.96172	3.13856	3.10715	2.99368	3.17311	2.93914	3.10486	3.58119	3.14654	3.17812	3.01981	3.2575	3.20985	3.19161	3.27035	3.08612
ABR	6.54557	6.48563	5.38953	5.8532	6.11623	5.60826	5.64836	5.46275	6.23121	6.61036	6.38326	6.21475	5.69034	5.75174	6.01231	6.13317	5.69775	6.45635	6.53871	6.11149	6.03921	5.51782	6.04615	6.17622	6.12181	6.43107	5.66523	5.20564	6.23385	6.29077	6.4944	6.93026	5.74444	7.02572	6.86737	6.90397	8.04753	6.44428	7.54123	7.13327	7.905	5.9837	6.41323	6.02365	6.88594	6.38833	7.83524	6.17209	7.55732
ABRA	2.96696	2.85367	3.04203	3.15179	2.91941	2.87004	3.05705	2.94771	3.01421	2.9722	2.92405	2.92232	2.85786	2.82719	3.00908	3.21285	2.81919	2.81199	3.13672	3.01338	2.98544	2.94856	3.01559	2.88331	2.96431	3.19638	2.96407	3.06661	3.43045	2.82016	3.41307	3.31469	3.30209	3.22514	3.19236	3.06129	3.02024	3.22108	3.28947	3.00379	2.97357	3.06157	3.04557	3.24265	3.499	3.08316	3.03119	3.05982	3.1701
ABT1	6.64431	7.19309	6.2823	6.97522	6.65683	7.04908	6.52272	7.3338	6.64532	6.96322	7.39579	6.80133	7.05177	7.2778	6.68596	7.37344	6.33573	7.42565	6.71867	6.73917	6.25784	7.37573	7.24985	7.32812	7.12498	7.0985	6.42083	5.63024	5.62552	5.81464	6.29851	6.33079	6.33921	6.609	6.87311	6.63305	6.38497	6.26321	6.22769	6.71489	6.44146	6.70036	6.89401	6.55073	7.14464	6.50698	7.26766	6.3334	5.91644
ABTB1	5.6617	5.77365	6.68466	5.95595	6.2433	5.8152	6.43614	5.69772	6.14858	5.65485	5.39842	6.22543	5.69478	5.8523	5.93951	6.43293	6.44666	5.89669	6.30195	6.41713	6.28797	6.10144	6.0859	6.28719	6.23933	6.36552	6.33747	6.39605	6.74204	6.63628	7.52198	6.75459	7.05148	6.94149	7.23849	7.40315	8.13429	7.03433	6.84648	7.01445	7.36733	6.23848	7.51003	6.4695	6.64205	7.17462	7.09415	7.40225	7.9703
ABTB2	6.17029	6.79364	6.49069	6.57348	7.67762	6.60316	6.18122	5.74282	5.79508	6.2034	7.20561	6.09834	6.23453	6.50422	5.51238	6.00501	6.32713	8.00394	7.08683	7.34518	6.43261	9.94235	6.94927	6.0602	8.48493	7.30309	6.26602	5.82471	7.0617	7.83536	6.27958	6.43271	5.49329	6.75847	6.17254	6.77223	6.62131	6.96374	7.30202	6.14818	7.11539	6.97105	6.52993	6.33628	7.09009	6.70603	6.85366	6.47973	6.96166
ACAA1	9.07573	8.4488	9.47394	9.18296	8.81088	9.32662	9.64618	8.30293	9.67326	9.58449	8.95102	9.22132	9.20045	8.66484	8.9853	8.65549	8.8663	8.80296	9.3753	9.12555	9.21673	7.9344	9.11312	9.10729	8.76436	8.55975	9.30599	9.19217	9.39582	9.26863	9.08285	9.43438	8.9691	8.84523	9.31157	8.47779	9.03283	8.96267	9.67051	8.97947	9.65183	9.02557	9.24799	8.27046	9.54532	9.31121	8.59244	8.68518	9.35856
ACAA2	8.89729	8.41366	5.24906	8.22407	7.38661	6.57844	7.34713	7.35255	6.19417	8.1595	8.5144	9.12831	8.45133	8.66636	7.73188	8.12643	8.04769	8.91713	8.40829	8.40211	7.70549	9.27739	7.07765	9.39291	9.12613	8.63136	8.53051	8.64898	6.26363	6.79921	7.7362	8.00578	5.98832	8.21763	8.85979	8.63345	8.43	7.81606	8.59528	8.35776	8.26916	9.1837	7.94651	8.77119	8.14138	5.98946	7.26404	7.47986	7.25079
ACACA	8.60212	9.67431	7.55402	7.39329	8.58527	8.99757	8.74618	8.74146	9.00234	8.69035	9.17947	8.70455	8.30084	8.61689	8.21459	8.4191	7.99643	7.05249	8.37401	7.64907	8.80665	8.80659	8.39141	8.52265	8.55768	7.62711	8.38816	8.66002	8.99925	8.97346	8.00191	8.29906	9.14332	8.73514	8.69095	9.01971	9.01012	8.93242	8.6757	8.11821	8.85837	9.3267	8.36977	8.92511	9.05717	9.12904	8.32246	8.44937	9.08363
ACACB	6.53014	4.53217	5.57998	5.63675	4.76391	6.13014	9.08747	6.03968	7.64513	4.19257	5.46466	5.92039	5.7942	5.52824	6.29136	4.966	5.69711	5.9572	5.74699	5.8147	5.30333	7.84674	5.68913	5.97797	5.92026	5.11956	6.19025	8.33348	5.10091	5.98083	7.86306	6.34767	7.9005	5.10719	6.54274	5.78485	6.94247	5.89202	5.32629	5.2339	7.10277	4.72071	5.6199	6.02886	4.50309	7.03469	4.13926	5.17837	7.50216
ACAD10	4.86494	5.35172	5.23314	4.52347	4.65387	4.96889	5.18287	4.85897	5.04195	4.391	3.93743	4.07427	4.75089	4.68041	5.17799	4.39878	4.35531	4.2895	4.93755	4.43488	4.76603	4.91726	5.03238	4.60467	4.57892	4.4398	4.64156	4.44883	5.75051	6.29271	5.60918	5.65775	5.77675	6.05253	5.85287	6.26778	5.38388	5.89554	5.95155	5.55825	5.12028	6.06576	5.20628	4.86325	5.49714	6.44701	5.20991	5.66937	5.20334
ACAD8	8.47443	6.68712	6.43097	7.68577	8.27013	8.38048	7.37888	7.77208	8.42842	7.90648	7.26228	8.1589	7.71382	8.00306	8.04942	6.60185	7.42957	7.40507	7.88758	7.02095	8.19389	7.83607	7.68662	8.25213	7.89309	7.39832	7.15707	6.00294	5.30345	6.85427	6.4944	6.92247	6.65403	7.18405	7.8334	7.11486	6.8792	6.65575	7.53891	7.38099	7.27211	6.80164	6.76819	7.69818	7.47014	7.47363	5.75558	6.12747	6.92549
ACAD9	7.45464	6.61259	7.24741	7.33044	7.33554	8.25317	7.45666	6.98186	7.20935	6.66687	7.18557	7.52802	7.17999	6.48634	7.31742	7.35682	7.35949	7.37129	7.46146	7.54302	7.70232	7.35697	7.44658	7.88018	7.60004	7.8913	7.56077	8.18856	7.47966	7.3025	7.38044	6.31478	7.16785	7.20507	7.37622	7.49246	7.60501	8.15873	6.71957	7.34923	7.43951	6.71342	7.37362	6.55472	7.35806	6.89537	7.44381	7.16829	6.86813
ACADL	6.87994	5.5194	4.24183	5.73154	5.22131	5.02525	2.96327	3.33921	2.98717	4.38096	3.27033	3.27248	3.52735	4.40682	5.46876	3.33018	3.63364	5.69059	4.40134	3.98159	4.97977	6.19634	4.41503	4.32782	3.06153	3.10671	3.30468	2.92993	4.16864	6.82333	3.92523	5.13106	3.62557	3.3545	4.04332	3.60812	4.44762	3.9315	6.87247	3.07643	4.56335	3.3754	5.19823	4.38156	3.89862	3.95226	3.51896	3.52567	3.8139
ACADM	9.99428	9.74982	7.74754	9.71317	9.46765	9.2079	8.72449	10.0074	8.96418	9.79039	9.66332	10.1945	10.4773	10.5897	10.0621	8.84628	8.85078	9.83966	9.91396	9.32314	9.29789	9.61877	8.8786	10.0105	9.99623	8.53758	8.66226	9.33957	8.54347	9.47311	9.42002	8.71826	9.38337	8.86344	9.55283	8.40517	9.07802	8.61096	9.38894	9.23155	9.39771	8.92801	8.82045	10.0652	8.85139	9.43023	8.24556	8.42173	9.27734
ACADS	5.9037	5.87461	6.13239	5.67033	5.69175	5.87909	7.11395	5.57126	6.20234	6.05581	5.93347	5.81086	5.63824	5.55731	6.018	6.10354	5.54011	5.88528	6.06714	6.17936	5.84527	5.69397	6.08765	5.5724	5.65158	6.1804	6.31418	6.4119	6.16959	5.44073	5.75744	6.03554	6.24349	5.96745	6.01028	5.82374	5.98399	6.21309	5.94279	5.33883	6.23734	5.51391	5.82023	5.65349	5.93487	6.05318	6.24423	6.08749	6.15136
ACADSB	7.65191	5.80316	5.46679	6.72815	6.63291	5.23955	6.03342	6.73043	6.8642	6.08567	6.65171	7.45911	6.36856	5.63051	6.1846	4.93831	6.21428	7.1789	7.12363	6.6729	6.19018	7.35258	5.81053	7.39263	7.90505	6.28862	6.63872	5.45934	4.67094	5.96062	5.83917	7.26458	6.10098	6.11163	5.70452	6.46339	6.68195	6.47212	6.35369	6.13053	7.15785	6.20125	5.88333	5.48128	6.13675	5.40162	4.48823	6.33567	7.02089
ACADVL	8.9413	8.79888	9.67231	7.84302	7.6945	8.62834	10.9214	7.33175	10.1129	9.43088	9.46299	8.09937	8.00249	7.39715	8.70232	8.56863	8.34255	9.10702	8.65464	8.8178	9.95916	8.2391	8.39603	9.15239	8.97774	8.95574	9.61585	9.08102	9.68367	7.88564	9.85132	9.04902	10.2968	9.47012	9.78183	9.46877	9.07156	9.07086	9.33151	9.39111	9.39947	8.03195	8.97856	8.39186	9.47458	9.00426	10.0105	8.70491	8.7573
ACAN	6.15666	5.18502	6.34938	5.78442	7.3849	4.97919	5.18652	4.95383	4.8703	5.62346	6.60319	5.16109	5.23234	4.93902	4.97171	6.16897	5.22965	4.98841	7.72871	7.74353	5.89429	5.08882	8.44933	5.09428	5.19115	5.22614	6.36589	5.94565	5.99657	5.85193	5.54029	6.77096	5.45124	8.0881	6.24502	6.73047	5.58777	6.55034	9.45272	5.16106	6.23283	4.96801	7.75142	5.25899	5.72609	4.85007	5.43675	6.19249	4.90765
ACAP1	4.95879	3.9795	4.28166	4.5324	4.31271	4.20466	5.4589	4.1082	4.06642	4.61246	4.31968	4.27177	4.15301	4.44196	4.31074	4.74375	4.61246	4.46933	4.27482	4.70555	4.27398	4.33504	4.41679	4.32956	5.07369	4.42316	4.61641	4.61101	4.61559	3.83408	4.63867	4.14935	4.38799	4.05996	4.02085	4.54195	4.32361	4.52655	3.9796	3.775	4.2147	4.31418	4.38188	4.08177	4.21625	4.38712	4.78574	4.3242	4.37942
ACAP2	5.39145	4.63464	4.77016	5.40176	4.91261	5.17508	4.60339	4.67366	4.4579	4.86244	5.89908	5.20269	5.45018	4.97303	5.36692	5.56658	4.9489	5.71649	5.21213	5.20509	4.27241	5.40928	4.1254	5.16011	4.91482	5.35337	5.0171	5.25844	3.98806	5.07273	4.63546	3.92804	5.07621	4.62534	4.49539	4.70292	4.41143	4.40427	4.4276	5.55523	4.97834	5.28306	4.82203	5.55355	5.73977	6.14835	5.16345	4.7588	4.52417
ACAP3	5.45314	6.60091	6.43875	5.38103	5.95972	6.99512	6.64489	5.67893	6.2545	6.01291	5.7681	5.81626	6.14601	5.50969	5.05324	6.34933	6.252	5.0318	6.43233	5.44663	6.81842	5.08036	6.96704	5.20266	4.29134	5.29901	6.14006	6.51944	9.05555	7.60503	7.44349	8.4533	8.93269	8.5542	8.29267	7.64082	7.93881	7.99189	7.62021	7.16999	8.26113	6.99256	7.62871	7.20667	8.81518	6.14029	6.68731	8.08484	7.36116
ACAT1	10.007	8.96745	7.93012	9.6397	9.33464	8.97046	9.84385	9.06958	9.41225	9.60145	9.32619	10.6988	9.37895	9.66132	9.8513	9.28956	8.45561	9.89049	9.0728	9.29502	9.12821	9.73114	9.4312	9.61545	9.80422	9.56319	9.28325	8.67511	7.31965	9.05609	8.5301	9.38902	8.18114	9.01457	9.31617	9.67205	9.26768	9.02693	9.05369	8.03849	9.36242	8.30393	8.91433	9.83092	9.57219	9.19053	9.08615	8.39479	9.04875
ACAT2	7.13121	9.50348	6.57307	8.07569	8.25663	8.19235	6.8185	7.95334	7.57048	8.00824	9.15238	7.69767	7.51493	8.34017	7.64013	7.61944	7.51246	6.52323	8.16848	6.88523	7.26237	8.58489	7.73962	7.75887	8.0347	7.17381	7.02021	7.70044	7.47685	9.38924	6.37874	6.6824	8.06499	7.46271	7.46021	7.68961	7.55411	7.65083	8.2805	7.36849	7.93199	8.59475	7.24423	8.87475	8.01644	8.39611	6.56956	8.54306	7.16095
ACBD3	8.51	8.75387	9.3415	9.266	8.676	7.79088	9.37976	9.17299	8.60316	8.44012	8.42319	8.69326	8.2889	8.44662	9.0687	9.45362	8.02097	8.30908	8.56125	8.97343	9.03767	8.21037	9.03705	8.57192	8.68667	7.94658	8.77601	8.85281	8.04643	7.61535	8.04377	6.22444	8.89574	7.94866	8.46996	8.49609	7.22898	7.64931	7.69153	9.06738	8.02559	8.34597	7.26325	8.12254	8.35008	8.84033	9.05399	9.02026	8.10517
ACBD4	4.95743	4.84085	5.39271	5.22487	4.6682	5.21903	5.86926	4.70768	5.39177	5.4276	4.83421	5.21224	4.93338	4.81499	5.17117	5.0598	5.18396	4.91493	5.23219	5.24524	5.18906	4.95618	5.42699	5.33989	5.39448	5.37025	5.28474	5.74604	6.13006	4.87019	6.0647	5.53716	5.85186	5.32328	5.38252	5.45388	5.78213	5.172	5.24213	5.24973	5.68104	5.44169	5.17621	5.15248	5.16002	5.08581	5.76519	5.43497	5.8743
ACBD5	8.1073	7.20721	8.41519	7.26053	7.59447	7.59324	6.46776	7.26187	8.13099	7.06495	8.42025	6.56473	6.8525	6.78171	8.02196	7.24855	6.52352	7.09403	8.89386	7.58204	8.1627	7.3072	7.3796	7.4275	7.75539	6.22321	7.52411	6.62198	6.08561	5.04703	4.65683	5.70843	6.00383	5.57634	5.92867	5.78369	4.59889	4.67141	5.79574	5.74758	6.18682	6.14199	5.37922	5.20691	6.46097	6.74347	5.58387	4.63433	6.12224
ACBD6	7.02993	9.25403	7.47522	7.50596	8.09746	7.74588	7.53577	7.57531	7.31806	7.66692	8.63926	8.01259	8.03402	8.31137	7.89762	8.1001	7.32584	8.37695	7.77106	7.32913	7.26045	8.42266	7.93857	8.77677	7.85833	7.27121	7.72552	8.68996	7.64378	8.44462	7.47494	7.39817	7.86358	8.81574	8.14711	8.94823	8.35566	8.78767	7.72226	7.63162	7.45822	8.42868	7.84469	8.20684	8.42211	7.45704	7.82717	8.45234	7.19417
ACCS	5.75737	5.80414	6.98594	6.10474	5.37303	6.61686	8.34756	6.04387	6.60467	5.88243	6.16388	7.08667	5.99457	6.27073	5.59804	6.6817	6.89408	6.51129	6.34454	6.55544	6.82465	6.17985	6.35762	6.97459	5.74581	6.40893	6.88241	8.40585	7.22068	5.93739	7.21581	6.70737	7.15761	6.76451	6.53169	6.28358	6.42636	6.84215	6.34162	6.44716	5.8272	6.09886	6.16483	6.71964	5.96436	6.09891	7.38881	6.17186	5.98561
ACD	7.21856	7.99309	6.44146	7.14663	6.59754	6.69703	7.10605	7.29129	7.42695	7.36187	7.38057	6.66413	7.22513	7.21833	6.90409	7.43662	6.76791	7.00754	6.9304	6.69701	7.37919	7.1842	7.38198	7.27702	7.3089	7.12432	7.01457	7.50881	7.40705	8.25129	7.57392	7.8602	7.94807	7.87513	8.56931	8.55967	7.83064	8.05204	7.86241	7.73322	7.33178	8.0504	7.95032	8.21001	7.74784	7.79815	8.39999	8.27985	7.08041
ACE	4.0303	4.58927	5.38809	5.87949	5.70896	4.66332	4.90053	4.59753	5.93968	4.78872	4.57453	5.23031	5.25602	4.76726	5.25862	5.13338	4.37193	4.94845	4.52337	6.62332	6.11727	4.72183	6.01935	4.27161	5.7172	4.7826	6.84369	6.16479	5.85078	4.87251	5.84161	5.87123	4.80696	4.78346	5.82902	6.08802	4.49305	5.91108	5.45091	4.97506	4.49967	4.957	7.31118	4.7802	5.95519	4.92977	5.40685	4.90441	4.8028
ACE2	3.44191	3.3272	3.47263	3.3767	3.82215	3.2394	3.43412	3.32382	3.65272	3.32372	3.54068	3.56463	3.43596	3.79671	3.78435	4.04743	3.81446	3.28718	3.43141	3.43512	3.65839	3.33195	3.52824	3.62218	3.63716	3.17679	3.30249	3.43541	3.42573	3.38213	3.47785	3.65127	3.83211	3.2655	3.64382	3.19082	3.48371	3.68857	4.04524	3.29485	3.34624	3.75404	3.21916	3.30053	3.36026	3.82375	3.52144	3.38204	3.70626
ACER1	4.1484	4.16997	4.52998	4.32858	4.29486	4.1582	4.24557	4.21992	4.05543	4.19914	4.25476	4.36723	3.95651	4.15181	4.38949	4.66393	4.17339	4.25589	4.54479	4.19898	4.5066	4.40339	3.99158	4.27233	3.97518	4.16453	4.26456	4.57062	4.30068	3.83775	4.36498	4.47955	4.54412	4.20967	4.33441	4.37734	4.18938	4.49374	3.93606	4.20899	4.16997	4.29817	4.534	4.1257	4.28163	4.11706	4.26697	4.08405	4.32577
ACER3	9.1073	7.55318	8.81816	8.86516	9.02688	8.9053	8.33524	8.33793	8.91889	8.93995	8.44729	9.21364	8.98041	8.53058	8.45924	7.14315	8.42038	8.65777	9.49306	8.89134	8.67077	8.39888	8.43545	8.58773	9.53671	10.0123	8.5656	8.31302	8.81694	9.23321	8.15188	9.33685	7.64684	8.05429	8.47855	8.21756	8.32602	8.46572	8.57442	7.66116	8.98722	7.89273	8.2322	9.09822	6.79201	8.7923	7.17775	9.16857	8.2892
ACHE	3.80816	4.02026	4.39227	3.87132	4.1165	4.11314	3.75974	3.61595	3.72646	4.17637	3.7327	3.7317	3.81639	3.85341	4.01368	3.7887	3.7182	3.71101	5.0213	4.25005	4.7905	3.5939	3.74762	3.89277	3.9318	3.95296	3.80535	4.30513	7.78088	5.51841	4.50248	5.1581	4.33198	4.83259	4.56441	3.96691	4.8759	4.09435	5.31897	5.72762	5.13081	3.98697	5.72964	4.30314	6.02719	4.1293	3.79816	5.72782	4.18558
ACIN1	5.97826	7.04314	6.49951	5.79635	6.12945	7.1993	7.22257	6.6529	7.0127	6.64899	6.74654	6.59077	7.07823	6.49337	6.31014	7.16942	6.50051	6.41946	6.25251	6.14679	7.07928	6.67438	6.66718	7.10169	6.00928	6.46761	6.81746	7.00061	7.10251	5.98739	6.74439	6.87712	7.35484	7.03722	7.38272	6.75251	6.42784	7.23471	6.91862	6.833	6.89554	7.26778	6.82635	7.07342	7.46859	7.40259	7.10409	6.52448	6.4138
ACLY	8.23425	9.11515	6.48882	7.69222	8.61687	8.75226	7.66851	8.67993	7.54368	8.57437	9.22481	7.42095	8.04982	7.96679	7.80826	7.92307	7.21384	8.85206	7.25366	7.9424	7.82814	7.90937	8.41397	8.37732	8.23221	7.95663	7.07816	5.87585	6.64836	7.07454	6.93828	6.69192	6.7292	8.105	8.65289	8.07538	7.653	7.55581	8.40384	8.4032	7.36058	7.27613	7.49105	8.05668	8.74868	8.26659	7.85734	7.49307	6.51061
ACMSD	3.57906	2.9583	3.2235	4.2511	3.12462	3.00114	3.19691	3.06495	3.37091	3.1738	3.27278	4.01649	3.05517	3.65312	3.19253	3.25263	3.32957	4.66953	3.1313	3.06026	3.33112	3.0829	3.2305	3.29125	3.06992	3.305	3.49982	3.60633	3.4613	3.57362	3.22757	3.41346	3.48184	2.9574	3.03344	3.14296	3.12694	3.34888	3.13554	2.77441	2.93494	3.44465	3.06601	3.13223	2.82216	2.95984	2.9776	3.12501	3.30004
ACN9	7.53878	7.54057	5.76059	7.77244	7.1121	6.96644	6.26197	6.50793	7.32343	7.49171	6.18365	7.99066	7.58281	8.45951	7.59053	5.10276	7.15451	7.57155	6.62326	6.82329	5.53827	8.25793	7.47203	7.26026	7.04595	6.36826	5.99337	4.51363	5.52909	6.71718	6.14154	6.599	5.83581	6.57896	6.15068	6.67315	5.56932	6.01588	6.16724	6.18938	6.04365	6.60781	6.3158	7.14685	5.8479	7.21232	7.62765	6.65152	5.49761
ACO1	7.44899	7.51582	8.52794	8.35252	8.5716	8.28011	7.53817	7.38387	8.34537	8.46442	8.20131	8.08412	8.87943	8.19434	8.0998	8.32592	7.92719	8.14055	8.47366	8.59327	8.2731	8.12511	7.69317	8.13948	7.34561	9.1957	7.97669	6.72244	7.60667	8.29028	7.4306	6.84318	7.45045	7.84035	5.74304	7.69563	7.29171	7.65083	7.65205	7.64398	7.95488	6.50098	7.55067	8.15808	7.63983	8.11544	7.73426	8.65604	7.3076
ACO2	10.4459	8.82867	8.3183	9.4292	8.96749	9.66878	8.62235	8.8999	9.33522	10.0359	9.17876	9.06074	8.93797	8.9873	8.99301	8.92209	9.0544	9.11226	9.03431	8.38656	8.96146	9.57692	9.09828	8.85841	8.80528	8.76783	9.09218	8.66615	7.7383	9.81746	10.405	9.9463	8.46427	9.81477	10.2546	10.0114	10.7218	10.1463	10.3409	9.36799	10.943	9.45439	9.85201	9.14331	10.0637	10.1145	9.02364	9.41254	10.4924
ACOT11	4.90874	4.36318	6.30539	4.66515	4.57644	4.30527	5.90265	4.78267	4.85587	4.77132	4.51976	5.44277	4.44387	4.70725	5.29462	4.40846	4.63922	5.92369	5.48484	4.64551	5.65703	4.34805	4.33301	4.87215	4.65317	4.6618	5.01289	4.83396	4.84481	4.63858	6.40858	4.50308	5.13981	4.2155	5.22642	4.37496	4.961	4.13838	4.7387	4.86799	4.91093	4.15176	4.39639	3.94326	3.8368	4.81844	4.05719	4.73606	6.05582
ACOT12	2.83993	2.70855	2.80783	2.84363	2.66705	2.56357	2.59943	2.91836	2.74824	2.6727	2.93429	2.70571	2.66433	2.53989	2.55332	3.07072	3.92232	2.54254	2.89806	2.9293	3.53743	2.86493	2.76976	3.44485	2.61153	2.85663	2.64654	3.07138	2.71004	2.85359	3.75978	2.98847	2.91286	2.62008	2.89008	2.56696	2.62704	2.85367	2.85086	4.27957	2.73142	2.77976	2.79396	2.75407	2.87562	3.27806	2.6796	2.79263	2.68223
ACOT13	7.82921	7.29879	7.05259	8.0136	7.11278	7.2127	7.09349	7.29523	6.55625	8.05485	7.87064	6.8469	7.26835	7.47876	7.45801	6.39481	6.75532	7.64992	6.10513	7.27546	5.67066	7.75172	7.46219	7.75562	8.06518	7.77814	7.12871	6.42476	6.62606	6.42459	6.76811	6.70996	6.14705	6.37652	7.55033	7.09624	7.28561	6.79618	7.15214	6.22582	7.3059	6.88473	6.95987	6.8159	7.22264	7.4059	7.40681	5.52729	6.67226
ACOT4	5.11053	4.44569	3.94769	4.83061	5.10118	4.43616	4.73863	4.77212	3.898	4.51016	5.08714	4.98588	5.40155	4.4174	4.31432	4.50755	4.95624	6.20322	5.20481	4.92901	5.0083	4.49539	5.02186	4.52572	5.24748	5.10502	4.69679	5.09617	4.91642	4.77538	4.27964	4.3137	4.30004	5.83381	3.63072	4.6058	5.75592	4.29218	4.52375	4.56606	4.88405	4.44118	5.35564	4.3984	4.89049	3.88699	4.02324	4.93675	4.96023
ACOT6	2.78198	2.97632	3.02502	3.09784	2.93559	3.1729	3.0117	3.03147	3.02604	2.86065	3.10333	3.21021	3.16251	3.06806	3.02604	3.13933	3.15311	3.14704	2.99603	3.19331	3.30646	3.08507	3.17839	3.17808	3.10427	3.45314	3.35555	3.20978	3.41947	3.20226	3.557	3.14055	3.34758	3.26126	2.91212	3.36107	3.23424	3.12675	3.09626	3.10841	3.07482	3.23864	2.95014	2.95539	3.04747	2.99442	3.35373	3.17808	3.38581
ACOT7	6.80288	9.63933	7.13122	8.11115	8.46946	8.14513	8.68711	7.37712	7.08296	8.22247	8.38768	8.03626	8.22378	9.12624	6.12537	8.98369	8.66803	6.96574	7.60355	7.66214	7.47237	8.30968	8.78932	8.2021	8.17553	8.58783	8.07863	8.4628	7.90619	8.48603	8.42914	7.73929	7.96684	8.50386	8.54081	8.46054	9.57942	8.87254	6.90171	8.65982	7.69391	8.24155	7.9012	10.2914	9.71715	6.9672	9.745	8.05358	9.20195
ACOT8	4.03933	4.06418	3.82942	4.11189	3.37504	3.83636	4.99229	4.19126	3.73027	3.84261	5.24887	4.78872	4.10093	5.85782	3.52958	4.17368	3.41589	3.52367	3.90697	3.631	3.51369	3.93035	3.78789	3.44036	4.77844	4.50622	3.63567	4.4329	3.1786	4.53967	3.85241	3.66807	4.03338	4.12311	4.10892	4.23771	4.51808	3.83301	3.87538	4.4404	4.05636	3.63859	3.72956	5.5757	3.98375	4.118	5.04465	4.33487	4.22059
ACOT9	8.02034	7.56776	8.01149	8.33433	7.63404	5.8116	8.72225	7.75183	6.2673	8.18943	8.67268	8.91751	8.91011	8.8984	7.7196	8.51721	8.17034	7.79588	7.90613	8.01809	7.85989	8.04866	8.49884	8.07294	8.19388	8.28421	8.05334	8.57943	7.846	7.72699	7.98289	7.59374	5.79115	7.50873	7.95459	7.71854	7.55965	7.40897	7.69092	8.06168	7.09705	8.53317	7.85457	8.22893	7.97608	7.96919	7.97871	7.6229	6.17434
ACOX1	7.73196	6.71292	6.48556	7.57759	7.25794	7.45508	7.36037	7.76882	7.2171	7.11424	7.80212	7.26053	7.12642	6.46884	7.52799	6.83192	8.19992	7.00021	7.71228	7.27082	6.85458	7.94749	7.24552	7.33214	8.04505	6.72002	6.2716	6.83019	5.59739	6.9629	6.46715	6.48304	5.91017	6.34761	6.88017	6.38058	5.91971	5.76495	6.73676	6.9873	6.97926	7.3513	6.93345	6.4381	7.82573	7.98166	6.89133	6.10108	6.89522
ACOX2	5.06307	4.82195	5.96908	6.4265	4.88119	5.08646	6.00651	5.84164	5.7926	5.51856	6.46734	7.09912	6.16836	5.70226	6.41616	4.53655	9.33578	6.8834	5.74152	4.837	4.29231	5.25965	5.05813	7.11992	5.99637	7.43936	5.46276	6.07376	5.46038	4.12401	7.32762	5.60702	5.07575	5.45528	5.67314	5.19232	5.98264	5.15539	5.94099	5.94822	6.02267	4.75541	5.08469	4.69122	4.86179	4.47602	8.52604	4.44059	6.10948
ACOX3	5.73314	6.48584	6.15553	5.90215	6.6047	7.22701	6.44697	6.19392	6.5243	7.25166	6.21723	5.82005	5.97855	5.84375	5.80264	6.01066	6.21546	6.02365	6.00476	6.04642	5.31096	6.54727	5.88466	6.87816	6.23684	6.11053	6.08002	6.60516	6.53968	6.66234	5.88682	5.9174	6.80559	5.87484	6.22702	7.4912	5.38361	6.50163	6.06426	6.02958	6.26482	6.99132	5.48243	5.33888	6.52473	6.20322	6.14857	5.8404	5.98411
ACOXL	3.96161	4.08641	4.07937	4.04907	4.028	3.97176	4.42227	3.94787	4.07178	4.29426	3.99608	3.95378	4.10668	4.02227	3.91482	4.34106	3.94311	3.92493	3.78237	4.07583	4.07923	4.04464	4.10483	3.95576	4.50717	3.99604	4.16198	4.86287	4.54723	3.93584	4.23984	4.22317	4.07178	4.16424	4.14619	4.11283	4.19865	4.67585	4.07234	4.05737	3.97804	4.25602	4.21516	4.33737	3.9874	3.85758	4.59034	4.69049	4.04833
ACP1	7.43833	8.64949	5.81085	7.83057	7.84247	7.2055	6.76306	8.02879	6.31658	7.79202	6.49577	8.79401	8.38762	8.92602	7.31461	7.78001	7.69397	8.07166	6.6994	6.46979	6.25986	8.83035	7.55596	8.31326	7.7474	7.67665	6.95816	6.54349	6.0387	7.46862	7.228	7.22949	5.46264	7.29816	7.14544	7.25952	7.12245	6.69625	6.81645	7.22347	7.18993	7.49638	6.96666	9.32385	7.77725	7.8013	7.43923	7.04559	6.57566
ACP2	7.4439	7.04993	8.00275	7.67442	7.61697	8.20994	8.53122	7.0459	7.34595	7.89594	8.44168	7.59195	7.13826	6.95056	7.13374	7.41009	7.17033	7.29791	7.89227	7.98887	8.16343	7.47514	7.21202	7.86116	7.80769	8.1853	7.96191	8.93459	7.34146	7.49344	8.40629	7.59988	6.70054	8.12147	8.27328	7.90227	7.93513	7.92359	8.18928	8.75363	7.7415	7.19361	8.19651	7.76823	8.29806	7.22989	8.585	7.25138	7.6604
ACP5	4.3703	4.44931	4.78692	5.68684	4.61771	4.71464	5.91915	5.20259	5.00057	4.63701	5.42239	5.45917	4.63872	5.0143	4.49128	5.13492	4.24624	5.56476	4.20613	5.27377	4.64148	4.44507	6.31921	6.94486	4.9478	5.92047	6.81508	5.22342	4.30595	4.14638	9.46885	4.78297	4.20238	4.23358	4.94811	5.14425	4.64416	6.84406	5.21904	4.29542	4.33108	6.385	5.5141	4.92897	4.42601	5.33529	7.32117	4.49428	4.77811
ACP6	6.66754	6.8976	7.58889	6.69162	6.74355	7.78396	9.8474	6.49358	7.43124	7.77833	7.6645	7.23081	8.19085	8.13759	7.2728	6.4524	7.39211	8.00891	7.52414	7.22552	6.62136	7.99075	6.69742	8.45762	7.49179	8.35162	7.49329	7.58961	6.42558	7.29878	8.57159	6.43271	6.89629	7.73682	7.62004	6.69942	7.01858	7.22813	6.40102	8.67148	7.4042	6.8451	7.00448	6.11969	7.59917	7.25153	8.22342	6.04685	5.80149
ACPL2	11.4506	9.09823	10.5661	9.79869	10.0371	9.55791	8.09783	10.1732	9.27975	11.721	9.16987	10.2421	10.0363	9.38063	9.79158	8.9952	9.94152	10.143	9.89324	9.95613	9.50013	9.44505	9.26554	10.2275	11.3067	9.67898	8.93719	8.1351	10.2114	9.87723	8.97307	8.74504	6.86211	9.30097	9.83681	9.6045	9.3876	9.85927	10.156	9.27702	9.43292	9.19296	9.18703	8.45455	8.70967	9.1786	5.28046	9.59118	7.69867
ACPP	3.71404	3.00973	3.17747	3.48982	3.15933	3.16002	3.12005	2.96664	3.11914	3.71404	2.82539	3.40306	3.19566	3.30946	3.3754	3.12639	3.369	3.23158	3.37865	3.57488	3.15977	3.05977	3.21293	3.22978	4.41199	7.3867	3.12631	3.51245	3.13546	3.19211	3.12005	3.05156	3.0942	2.8612	3.32245	3.08309	3.1316	3.12795	2.87787	3.10486	3.08341	3.11875	3.46973	3.0492	2.93633	3.03794	5.08111	2.92373	2.95974
ACPT	5.35497	5.46511	5.53736	5.39449	5.67132	5.36125	5.92909	5.42366	5.88637	5.93571	5.66147	5.29865	5.69346	5.38426	5.66934	6.42911	5.76181	5.76167	5.32722	5.477	5.82865	5.53087	5.48111	5.53831	5.69151	6.15445	5.55751	6.05689	6.13554	5.45784	5.82816	5.62444	5.65254	5.74008	5.40231	5.46804	5.27685	5.80851	5.44857	5.36517	5.4052	5.61116	5.69947	5.5905	5.5342	5.66376	5.69571	6.14268	5.48061
ACR	3.77789	4.16923	4.15225	3.95228	3.98109	3.82622	3.97617	3.95041	3.95356	4.01846	4.0189	4.22005	3.95281	4.05618	3.8321	4.32041	4.0273	3.97611	3.86078	3.97151	3.99941	3.97028	4.02917	3.99312	4.10427	4.08273	4.14732	4.20642	4.71239	3.76503	3.69685	4.32108	4.51443	3.95099	4.02633	3.87976	4.30216	4.16031	3.78258	3.58172	4.43322	4.23704	4.07809	4.18577	4.14377	4.3283	4.08598	4.11607	4.49077
ACRBP	4.70345	5.04271	4.96186	5.01221	4.77537	4.83001	5.83115	5.11963	4.85866	4.88909	4.63416	5.06456	4.83211	4.96743	5.04729	5.27618	4.73468	4.75249	5.48245	5.13907	5.11843	4.75698	4.86914	5.17904	4.83092	5.12918	5.53385	5.45831	5.32043	4.69708	5.65435	4.86553	5.52268	5.03399	4.96896	5.01936	5.38361	5.09219	4.94041	5.32609	4.9558	4.82689	5.04648	5.14031	5.08136	4.4123	4.83137	4.98378	5.27004
ACRC	5.7261	9.59462	5.25251	5.28959	5.58291	6.82025	5.24284	6.29373	7.04994	5.47501	6.86131	6.4829	7.38354	6.29796	5.06561	5.57946	5.82769	5.41742	5.28381	5.43228	6.84627	5.17272	5.28655	5.82587	5.14121	4.68848	5.28407	7.1421	4.48712	5.5907	5.30706	5.43031	5.237	5.89977	5.76065	5.75714	5.04742	5.44157	5.84481	6.043	5.11444	5.06182	5.83463	6.18742	6.1684	6.34936	5.72616	5.60187	5.84829
ACRV1	4.17147	4.57232	4.09795	4.04327	4.6338	4.7549	4.19601	4.10384	5.03501	3.81376	4.76242	4.02844	3.86782	3.77475	4.36716	4.33608	4.32787	3.79731	4.12929	4.37689	4.15432	4.01409	4.33254	4.23001	3.8136	3.38239	4.04816	4.24578	6.03088	4.83567	4.21872	4.46904	4.28906	4.95582	5.0395	4.26676	4.87446	4.6628	3.97623	3.69116	4.38624	4.32172	4.28403	3.92995	4.85188	4.52635	4.42654	4.32681	4.43681
ACSBG1	6.71475	5.11306	6.66988	7.55391	3.48414	7.47782	4.44953	5.92241	7.75783	6.93206	7.87286	7.68383	7.31802	8.27851	7.67894	8.45235	9.08809	3.28818	8.73154	6.60087	6.57074	8.63544	5.71667	6.29047	3.64896	3.24234	7.39405	7.72809	5.27143	5.68573	6.92278	6.39683	8.14543	6.69674	8.50593	5.71076	8.22971	7.08191	7.13822	4.92823	8.94073	5.36484	6.17834	5.21786	6.46002	8.99471	3.7105	5.18087	9.03241
ACSBG2	3.8289	3.78905	3.86412	4.11189	3.659	3.6916	3.96177	3.64441	3.57529	3.86581	3.72878	3.82773	3.68633	3.58106	3.67415	3.85026	3.95963	3.4935	3.67845	3.6792	3.65564	4.23106	3.66154	3.91796	3.7542	3.55936	3.57655	3.73164	4.35156	3.42425	3.94596	3.9208	3.91285	3.59347	3.95535	3.71563	3.86013	3.93965	3.54439	3.73613	3.76042	4.21337	3.96202	3.85161	3.97448	3.93156	4.35591	4.31292	4.00864
ACSF2	6.0451	7.37772	6.41896	6.35411	6.03427	6.27155	8.07214	5.26068	5.94552	6.16901	5.17878	6.52269	5.50846	5.43745	6.20675	5.81696	7.23662	6.04669	7.81443	6.81723	6.32325	5.60216	5.54732	5.68954	6.58204	6.11857	6.44241	6.38025	6.35652	7.11521	7.16073	6.59339	7.11439	6.18023	6.13992	8.31033	8.47242	7.07047	6.50095	5.89845	7.01134	4.75891	6.28867	5.55704	5.07409	5.88449	6.3288	6.35417	6.5318
ACSF3	5.45513	5.47437	5.72796	5.43992	5.55191	5.72001	5.90101	5.71796	5.69251	5.53028	5.60944	5.80415	5.65133	5.70684	5.65438	5.87369	5.5378	5.77992	5.71573	5.66756	5.6272	5.79258	5.79023	5.82704	5.72093	5.84759	5.78188	6.05332	6.05571	5.96308	6.03138	5.26069	5.58171	6.21516	6.04291	5.79308	5.61061	5.87539	5.87947	5.23401	5.70754	5.87058	5.85158	5.56213	5.87097	6.21736	5.88953	6.07928	5.78871
ACSL1	8.70776	8.30645	7.01492	8.47437	8.2581	8.07785	9.25993	5.32724	6.64593	8.93863	8.22441	8.7541	8.02168	8.38691	8.33036	7.51844	7.17494	8.26746	7.77056	9.6664	6.53038	7.86408	8.04623	7.96114	7.6982	9.69401	9.03509	7.60953	5.88904	8.05203	8.78359	7.68434	7.40712	7.07101	7.36853	8.34946	7.65297	8.5361	7.77552	8.73937	8.85099	6.81961	8.31216	7.69494	8.66463	5.07748	5.97466	7.25989	7.13941
ACSL3	8.8128	8.97531	9.29051	9.43392	9.3002	10.6208	8.66694	8.40231	8.66972	8.6181	9.65366	8.68055	9.38525	9.32459	8.57808	9.50042	10.4766	8.34814	9.33313	9.08736	8.52454	8.85428	9.21654	9.50477	8.77864	8.504	8.01559	8.4389	8.86975	9.64659	9.48466	5.89766	7.42517	8.27838	8.73656	8.40192	8.88751	7.84668	8.44629	8.68184	8.87507	9.71934	8.0704	7.92895	8.33936	9.82221	7.94114	8.69915	9.08676
ACSL4	7.10348	7.0407	5.24689	7.54496	6.59679	5.45204	5.98845	5.88877	4.96802	6.91955	6.78033	7.04412	7.45595	6.66666	6.33095	4.77684	6.03759	7.66623	6.74431	7.37752	5.81438	5.56183	6.96941	5.96687	6.74031	8.11208	6.24747	4.32889	4.36844	4.92623	4.75393	4.98999	4.31229	4.98703	4.85446	5.22362	5.41261	4.42356	5.58619	5.77264	5.31946	5.49414	5.49605	5.31732	5.185	4.52582	7.89224	5.02354	5.51069
ACSL5	5.82138	4.43304	5.24517	6.79684	5.24319	4.89622	6.1477	4.32319	5.13847	5.69525	4.66225	6.30051	4.94825	5.1358	6.21442	4.60704	5.18706	7.26829	5.62322	5.76309	5.1962	4.41343	5.30969	4.96542	6.92838	4.87891	6.15596	6.01848	4.98851	4.81321	6.04866	4.43578	4.28302	5.06719	4.62301	5.3279	5.63305	5.32634	5.18692	5.42808	5.77782	4.69483	5.60901	4.12332	4.86436	4.33526	6.11915	4.7792	6.00913
ACSL6	7.10951	6.45367	3.61372	5.8338	7.41749	3.65095	3.05942	3.36833	6.28163	5.89649	3.80079	6.8597	5.11421	5.4943	8.24714	3.24687	6.38459	6.00062	8.73033	6.3165	5.58965	6.39489	5.88989	2.82166	7.38172	2.81198	3.82125	5.46585	5.81078	7.15223	5.75107	4.61925	3.26635	5.90189	4.49325	5.18355	8.52691	6.86617	5.80353	4.02643	7.71151	2.69765	5.59212	4.13099	5.00031	3.34142	2.78953	7.07041	8.65348
ACSM1	3.12116	3.20466	3.79995	3.31103	3.29557	3.42163	3.95296	3.4035	3.36152	3.47003	3.03677	3.45959	3.38573	3.37912	3.51002	3.58788	3.38637	3.45238	3.4986	3.26522	3.54409	3.35981	3.34729	3.26031	3.26705	3.45959	3.43092	3.78777	3.52983	3.37475	3.49516	3.70615	3.96292	3.19688	3.30247	3.1468	3.28143	3.47096	3.11623	3.13232	3.10889	3.28988	3.35614	3.59109	3.01182	3.24596	3.76098	3.39717	3.81594
ACSM2A	2.29063	2.89106	2.51421	2.57819	2.56797	2.48239	2.46005	2.56375	2.56527	2.45428	2.57673	2.45948	2.54798	2.44122	2.55098	2.67072	2.61987	2.54239	2.4931	2.40602	2.46887	2.57779	2.44586	2.6346	2.50492	2.48044	2.6138	2.88513	2.60147	2.67539	2.7428	2.81619	2.62242	2.62148	2.46254	2.43591	2.50855	2.75842	2.57887	2.51683	2.49852	2.49663	2.63762	2.75579	2.58969	2.83859	2.51421	2.65226	2.54914
ACSM3	3.28089	3.06769	3.31811	3.20413	3.13706	3.11496	3.23234	3.36833	3.14164	3.1786	3.20558	3.33742	3.32426	3.58928	3.07069	3.43229	3.18587	3.30576	3.13694	3.23897	3.4689	3.35843	3.03363	3.48855	3.1375	3.7212	3.30249	3.9662	3.49313	3.34357	3.56011	3.42766	3.37689	3.33195	3.21675	2.92747	3.08951	3.377	3.16777	3.3856	3.25683	3.2251	2.99737	3.05668	3.11243	3.03833	3.03766	3.08634	2.95375
ACSM5	6.74738	5.00426	6.46868	5.79317	5.98856	5.89671	4.63205	5.83829	6.18753	5.84515	4.54609	6.68638	5.79008	5.74513	7.20412	4.89464	5.32542	4.41467	7.6855	6.69169	5.89536	4.43589	6.56726	5.21883	5.58377	4.80963	6.64973	5.30256	5.25759	5.75789	6.42986	6.02311	5.672	5.43422	6.01165	5.55534	5.90526	5.98718	7.1367	5.78059	7.42092	4.38342	6.13614	4.31644	4.91164	4.23346	4.23151	5.23392	7.09023
ACSS1	5.52368	5.79993	5.66033	5.64521	5.60675	5.86999	5.26549	5.03593	7.18763	5.74848	5.53774	5.92071	5.36285	5.42454	6.12886	6.72847	5.70916	6.15648	5.81782	5.542	5.58548	5.11987	5.35924	5.1208	6.07001	5.04502	5.96501	6.08683	5.95837	6.25959	6.63386	6.98598	5.8378	6.10001	6.40844	6.49322	6.79583	6.6519	6.00837	6.1811	6.78883	6.00904	5.54223	6.45226	6.06159	7.05925	5.48267	6.42172	6.68949
ACSS2	6.3808	6.87638	6.78997	6.29762	6.28994	5.95765	7.34839	5.69268	6.68466	6.37734	6.80597	6.49792	6.2213	6.42683	6.25943	6.40132	7.38612	6.01744	6.25844	6.44709	6.51481	6.58236	6.02237	7.14498	6.45535	7.10118	6.87307	7.05617	6.8404	6.57215	6.80732	6.35331	7.07315	5.82305	6.59058	5.86311	6.66281	6.49612	6.56779	6.76765	6.77857	5.65261	6.13432	6.86372	5.92346	6.25367	6.32635	6.60548	6.26704
ACSS3	8.59761	4.82195	8.68053	7.84125	6.97827	8.78388	7.72782	7.0498	7.78518	5.80406	3.09738	6.62863	6.24408	7.30697	6.16654	7.16104	9.42751	7.7801	7.89162	8.31931	7.94425	6.6646	5.53452	8.97029	9.04807	8.75332	7.58267	3.75503	9.27317	5.63727	9.04388	6.9809	8.04992	6.32351	6.37411	3.74293	6.57719	4.51535	7.66642	9.30411	6.93134	4.40702	5.67143	6.80579	3.08258	7.52891	7.04341	5.31077	5.88303
ACTA1	3.41707	3.91971	3.50862	3.37414	3.66581	3.44749	3.30114	3.63944	3.33892	3.84653	3.54104	3.45812	4.10565	3.38292	3.46292	3.52099	3.36215	3.33324	3.59955	3.63527	3.28992	3.43167	3.5187	3.5135	3.36224	3.21476	3.70272	3.26902	4.23822	3.35971	3.87286	3.68872	3.67861	3.76261	3.74092	3.6615	3.60594	3.95304	3.41587	3.47623	3.47477	4.01098	3.94961	4.42178	3.89862	3.99501	4.34305	4.16465	3.90853
ACTA2	7.1646	7.30471	8.85882	10.1095	8.3741	11.9204	9.51778	11.7138	8.68584	11.7432	7.50561	9.16388	9.50725	8.97486	9.3015	11.0302	7.93077	11.3805	8.20657	10.4445	7.8859	11.4417	9.60345	10.1185	9.68351	10.0742	11.6965	8.84053	8.96939	7.88728	9.66737	8.89779	8.95627	7.43577	8.95411	9.25289	9.18927	8.20974	7.86782	9.88761	8.50173	8.37261	8.43029	9.80017	9.68	8.69475	9.78653	10.2442	8.8276
ACTB	12.837	13.1992	13.3504	13.2005	12.8905	13.1995	13.2924	13.0338	13.2075	13.3985	13.0072	13.0595	12.9329	12.7465	13.1173	13.33	12.7314	12.4512	13.2295	13.2616	13.02	12.3323	12.6883	12.2744	12.5606	13.0493	13.2588	13.0182	13.2271	13.4374	13.1956	13.4618	13.3858	13.1002	13.4237	13.4521	13.1967	13.2514	13.4003	13.2418	13.2196	13.2512	13.3804	13.4629	13.3856	13.3134	13.3185	13.3847	12.8135
ACTC1	8.86266	6.24724	5.00783	5.80309	6.34229	5.65425	5.12431	6.56752	5.18738	10.6002	5.46561	5.87448	5.46451	5.17841	6.44793	5.8007	4.80638	6.2248	6.65249	5.98142	5.08348	5.15453	5.49654	5.38566	5.28026	5.27405	5.61783	5.03076	4.76695	6.1595	4.98751	6.09754	5.01877	5.95662	5.96678	5.68165	5.25013	5.7349	5.55144	5.29324	5.72861	4.93005	5.84124	5.65667	6.32559	5.19937	5.74647	5.76401	5.29393
ACTG1	12.3997	12.975	12.2109	12.6524	12.7618	12.7073	12.5495	12.8558	12.6159	12.7536	12.6141	12.3019	12.2366	11.749	12.2135	12.628	12.9449	12.899	12.6666	12.4256	12.3159	12.5251	12.5619	12.5965	13.0675	12.3087	12.401	11.3457	11.8202	12.7591	12.4509	12.4702	12.2367	12.5256	12.8078	12.6044	12.4861	12.4538	12.6902	12.4616	12.0451	12.2283	12.3954	12.4375	12.5135	12.6021	12.3897	12.4834	11.5455
ACTG2	4.19812	4.81321	4.85091	5.86262	5.24188	9.93842	6.65146	5.36967	4.83311	8.43286	5.054	5.10327	6.14358	4.73763	4.58045	6.49943	4.12527	4.8369	4.46058	7.35349	4.15429	5.45918	5.63145	6.83171	5.45557	6.40189	8.30269	4.62727	4.32963	4.75207	5.94364	4.70795	5.31159	4.67023	5.60292	4.85999	5.44793	5.1311	4.44915	4.88237	4.83384	5.0991	5.22466	7.23466	5.91366	5.82784	5.20477	5.1048	5.16748
ACTL10	5.24648	5.67252	5.67918	5.37885	5.38062	5.0749	5.51049	5.1988	5.39154	5.40645	5.72738	5.59033	5.35697	5.70651	4.97919	5.68488	5.25903	5.16604	5.68817	5.32722	5.44057	5.52475	5.19962	5.67027	5.41668	5.81035	5.56163	5.22993	5.74677	5.33069	5.14006	5.65619	5.38556	5.61402	5.34241	5.772	5.4313	5.81461	5.15164	5.34399	5.45512	5.31515	5.23707	5.46687	5.45653	5.11814	6.13029	5.69807	5.13295
ACTL6A	8.25855	9.46395	8.62806	8.94353	8.47322	9.16618	8.17857	9.4318	7.78587	9.44282	9.17951	9.02848	9.23151	9.35644	8.67604	7.83594	8.77578	9.17778	8.14032	8.45767	7.43278	9.82983	8.80123	9.33385	8.66599	9.30242	8.19206	7.69018	8.34189	7.77184	7.33862	8.4026	8.67099	7.79854	7.92619	8.48782	7.62275	8.43659	7.35806	7.57844	7.27538	8.46648	7.73112	8.57595	7.93814	8.27588	8.98812	8.34795	6.60011
ACTL6B	3.20134	6.48477	3.86726	3.68805	4.62026	3.39707	3.03932	3.93266	3.1836	4.23021	3.06907	3.59925	5.22611	3.30489	3.40301	3.39504	3.9312	3.34218	3.546	3.2121	3.15466	3.75275	3.19121	3.30859	3.72638	3.5532	3.10932	3.46132	4.42491	6.60098	3.77231	4.87776	3.50411	4.66133	3.75083	4.47557	6.105	4.88599	3.94599	5.6842	5.33319	3.29719	4.91127	8.38141	7.88447	3.28603	3.56156	4.58094	6.11759
ACTL7A	4.37112	4.53106	4.70411	4.58169	4.51965	4.54115	4.74413	4.45922	4.50522	4.64973	4.43775	4.81612	4.68639	4.47096	4.38551	4.92143	4.80991	4.49056	4.48798	4.42455	4.43796	4.68928	4.557	4.86937	4.70163	4.73011	4.6598	4.6376	5.25762	4.23031	4.7714	5.03537	4.55854	4.82453	4.50849	4.8793	4.15102	4.73902	4.62779	4.52594	4.41074	4.80573	4.80125	4.55854	4.99932	4.51395	4.91143	4.16755	4.54483
ACTL7B	3.78554	4.21279	4.03112	4.05966	3.965	3.88506	3.99298	3.57784	3.85042	3.96205	4.01236	3.88173	4.00502	4.00852	4.10997	4.16422	4.00806	3.9208	3.98635	4.07022	3.95393	3.99191	3.94484	4.38738	3.97156	4.24845	4.08303	4.3517	4.23475	3.75143	4.03687	4.05591	4.02113	4.08311	3.84044	4.03481	3.94225	3.97186	3.7507	3.6249	3.99122	3.78928	4.17019	3.9438	4.13618	4.12199	4.45444	4.09719	3.9847
ACTL8	4.98577	5.57016	5.33921	5.20434	4.91141	5.13013	5.50073	5.2355	5.26417	5.01401	5.05558	5.18452	5.20757	5.14529	5.22784	5.58351	5.08579	5.01434	5.11741	4.92829	5.38858	5.38728	5.15049	4.95673	5.01108	5.14926	5.51784	5.55141	5.87106	4.92701	5.24689	5.33783	5.60457	5.21898	4.94433	5.13199	5.40035	5.13972	5.12063	4.79071	5.37019	5.30706	5.17617	5.09353	5.00062	5.17607	5.31353	5.38513	5.34597
ACTL9	3.05233	3.11555	3.46039	3.31175	3.1669	3.04258	3.11479	2.98582	3.26291	3.20875	3.08729	3.22915	3.23516	3.24181	2.98061	3.44129	3.35314	3.00422	3.29617	3.0273	2.9473	3.29662	3.07392	3.29195	3.11266	3.12518	3.40049	2.96762	3.50311	2.87976	3.5603	3.11125	3.2441	3.14341	2.8155	3.07607	3.03999	3.2766	3.21423	2.74656	2.53183	2.86691	3.17004	3.24179	3.9014	3.16244	3.44576	3.16891	3.01286
ACTN1	10.639	8.45728	10.5082	10.7073	9.61066	11.2054	10.8934	10.8332	11.1964	11.6193	11.1437	10.6611	10.0807	10.1273	9.72718	10.7927	10.4563	10.4313	9.74308	11.1007	10.3673	10.981	10.5903	10.0962	10.4887	11.0736	11.2091	10.1338	9.699	8.86775	9.79782	11.6026	11.0847	9.93299	9.19772	9.31964	9.23279	9.15684	11.0367	10.4372	9.32475	9.80529	10.6167	8.90385	9.63105	9.97882	11.1958	8.75804	9.12631
ACTN2	5.38058	6.48705	8.1429	6.29029	5.31657	7.70155	4.53145	5.63843	8.06221	7.3092	8.74537	6.90925	6.91822	6.0691	7.49294	9.12695	7.27704	5.78814	4.8791	6.22444	7.15792	7.42118	5.78915	4.62121	5.97935	4.6244	7.77705	7.24996	8.10865	7.18433	7.62527	7.33521	8.04231	7.08618	8.21218	7.32715	7.24413	6.78396	6.23375	5.06549	7.53339	7.95735	5.58771	4.98241	6.37127	9.27866	5.88996	6.38983	8.24532
ACTN3	4.08186	4.17967	4.05102	4.20725	4.29603	4.08766	4.84402	4.35676	4.18161	4.1514	4.23131	4.24196	4.13985	4.13869	4.1316	4.76625	4.19561	4.17795	4.11593	4.12366	4.1041	4.24022	4.19975	4.18025	4.16455	4.25334	4.0819	4.22108	4.27779	3.98024	4.76241	4.46404	4.19437	4.054	4.13065	4.30473	4.19694	4.68463	4.31114	3.98153	4.04143	4.14624	3.98323	4.27084	4.2268	4.22887	4.39044	4.22897	4.32229
ACTN4	7.09477	7.5082	8.32145	7.58838	7.68294	7.88932	8.11174	7.30187	7.93607	7.78562	7.86779	7.28634	7.47139	7.37744	7.23847	7.90697	8.72532	7.09874	7.5129	8.22147	8.20549	6.68233	7.58163	7.2142	7.3317	8.24651	8.10404	9.26657	9.58176	8.48498	9.87086	9.49959	9.11567	8.8369	8.50841	9.13254	8.59094	9.32126	8.70948	9.01806	8.8037	8.69198	9.24058	8.60596	8.35884	8.58663	9.82527	8.91654	7.79072
ACTR10	10.2473	9.77892	9.31114	9.94007	9.71998	9.79759	10.1204	10.5364	9.93369	10.6036	10.6973	10.1918	10.6879	10.152	10.3685	9.74785	9.87728	10.5609	10.1133	10.3856	10.0455	10.4073	10.0769	10.4933	10.0592	10.3269	9.92143	9.45772	9.10149	10.3596	9.62363	9.80084	9.35165	9.82856	9.77472	9.07392	10.1382	9.60702	10.0236	10.5587	9.95871	9.82898	10.1137	9.95953	10.2989	9.28499	9.79788	9.23276	10.1923
ACTR1A	7.60903	6.93206	5.15817	7.70713	7.8096	6.93855	6.90404	7.74687	7.08426	7.65961	8.55431	7.46583	7.64713	7.30716	7.65619	7.69558	6.83072	6.84211	7.49031	7.39346	7.14836	7.86039	7.57924	7.46509	7.81288	7.06916	7.48503	7.6188	6.57041	7.87142	6.90829	7.73573	7.28048	7.88764	7.92636	8.04766	7.98275	7.96628	8.22755	8.33086	8.20657	8.79663	7.85607	8.67681	9.44414	7.83571	8.11517	7.95508	7.28107
ACTR1B	7.50008	8.09682	7.51541	7.49777	7.71188	7.70574	7.75277	7.60692	7.69276	7.91013	7.47589	7.75784	7.87094	7.92523	7.60755	8.24744	8.23042	7.57346	7.79369	7.62658	7.64354	7.72822	8.11278	7.87923	7.78862	8.13412	7.84427	7.80324	7.30168	7.68363	8.05087	7.30884	7.55721	7.70831	7.9407	8.04326	8.35654	7.95613	7.84083	7.84324	8.12756	7.99492	7.89699	8.0817	8.1072	7.72835	8.05306	7.7138	8.34323
ACTR2	6.5213	5.7549	5.79823	7.38549	7.35506	5.48782	5.65672	7.07114	4.75185	6.6017	6.40107	7.6867	6.35621	6.82639	7.32511	6.16795	6.21765	7.13512	7.28523	6.1328	5.32579	6.12896	5.26653	6.1989	5.77983	5.68127	5.65227	4.32502	4.52337	5.59199	5.4792	4.46938	4.02056	6.31675	5.54457	5.38878	5.42647	4.22575	5.7156	7.53702	6.28626	5.97418	5.83755	8.10557	7.6598	6.82925	6.25235	4.90326	5.83042
ACTR3	9.04394	6.81011	7.67537	7.93058	7.72961	7.0561	7.49807	8.61543	8.15578	7.99992	7.92732	8.52339	7.87682	8.89562	8.10559	7.27233	7.4314	8.05166	8.015	7.94939	7.67948	8.47941	7.939	7.44468	7.81364	6.43735	7.80368	6.38599	7.63492	7.31242	7.55175	7.89311	7.50189	6.28389	6.78746	6.52207	6.94567	6.67791	7.4787	7.72861	7.54597	7.91922	8.07825	7.68863	7.14231	8.89536	7.05966	7.47921	7.09864
ACTR3B	6.50279	7.92374	6.21981	6.51356	6.92542	7.81287	5.80038	10.0855	9.18036	8.15757	6.61096	7.2281	7.47458	8.12764	6.28824	7.43813	7.3171	7.18557	6.26312	6.73371	6.43668	10.462	6.50177	7.5384	6.90897	6.92083	6.40913	6.37387	6.54652	7.07181	6.37276	7.84898	7.8446	7.52018	6.71613	7.11764	8.09303	7.13373	6.40732	7.23494	7.48823	8.12883	5.94557	7.82244	7.43435	7.96094	6.41507	7.10699	8.69699
ACTR3BP2	3.18626	3.35266	3.57486	3.91994	3.35523	3.3849	3.42956	3.65912	3.53056	3.6156	3.27234	3.41334	3.48672	3.45429	3.42957	4.34106	3.42447	3.37518	3.47098	3.23943	3.61988	3.4815	3.47584	3.40339	3.57012	3.52258	3.38825	4.42512	3.32498	3.07531	3.77231	3.16014	3.29984	3.295	3.47367	3.68745	3.08721	3.47468	3.11731	3.37451	3.35023	3.46389	3.38667	3.54259	3.38382	3.18846	3.20102	3.3517	3.6725
ACTR3C	3.89039	3.47844	3.51304	3.58357	4.52613	3.74076	3.61679	3.48064	3.65681	3.57661	4.58038	4.06441	3.87902	3.86292	3.69019	3.659	3.64439	3.73963	4.05214	4.8979	4.22693	3.79571	3.85	3.53417	4.08256	3.76577	3.56184	4.44075	4.02653	4.03441	3.32073	3.42413	3.79278	3.52032	3.67245	3.49585	4.16226	3.03195	3.30694	3.4071	3.73256	3.20687	3.49692	3.41146	2.98308	3.03849	3.28855	3.64439	3.78392
ACTR5	5.62447	5.57278	4.79933	4.90962	5.30558	5.77935	5.19327	5.75779	5.57161	5.72092	5.33613	5.57122	6.20651	6.01698	5.33586	5.67867	4.99717	5.58771	4.92915	4.76812	4.97571	5.65051	5.00962	5.56789	5.62762	5.23115	5.17341	4.24793	4.07821	5.09846	5.35235	5.04031	5.74501	5.40994	5.46552	5.43585	5.38596	4.88599	5.05882	5.70896	5.32569	6.02674	4.98499	6.78611	5.56464	5.88041	5.36588	5.40399	4.88248
ACTR6	9.37452	8.82939	7.96409	8.67453	8.8547	8.74713	7.73502	9.05564	8.36287	8.79774	9.08977	8.3824	9.42284	9.00663	8.5359	8.41045	7.95337	8.89458	8.52442	8.51513	7.99745	9.23186	8.28653	9.14763	9.14292	8.46498	7.81871	7.72093	8.77755	9.35266	8.03698	7.42727	7.79054	9.47494	8.81787	9.20728	8.33926	8.32097	8.62496	7.92879	8.41019	8.73319	8.35368	7.613	8.79624	8.92017	8.29258	8.12405	8.26725
ACTR8	6.42428	6.74214	5.12262	6.39989	6.53936	6.3476	6.5016	6.4858	6.27663	6.29701	6.63436	6.2394	6.79177	6.49069	6.68946	5.28222	5.71306	5.96635	6.97668	6.29663	5.81996	6.13234	6.93933	6.965	6.51916	6.33318	5.64197	5.17514	6.1294	7.29956	6.2013	5.91231	6.15359	6.92933	7.03677	6.91699	6.95563	6.93379	7.17338	6.97219	6.7918	6.93141	6.79794	5.64039	7.35806	6.78058	5.81067	6.32405	6.75749
ACTRT2	3.68766	3.7139	4.09916	3.78081	3.74938	3.80959	4.14783	3.78689	4.05419	3.78428	4.00113	4.18065	3.91872	3.81709	3.58936	4.20508	4.00363	3.99772	3.73676	3.83358	3.69342	4.03647	4.07808	3.7212	3.77262	4.10032	3.69997	4.44792	4.6817	3.52769	3.88888	4.37658	4.10691	3.83236	3.64477	4.09345	4.02717	4.08863	3.67543	3.51615	3.54861	3.8041	3.83114	3.67503	4.18528	3.87802	4.06323	3.47992	4.01984
ACVR1	8.13632	8.10212	7.97494	9.11744	9.80118	7.66008	7.8261	8.72167	7.421	8.50608	8.52111	9.72714	8.4547	8.68909	9.31435	8.09187	8.7205	8.42492	9.4127	8.98371	8.23267	8.23198	9.28396	9.2748	9.21867	9.70432	8.25197	6.27195	7.29807	8.10291	8.41485	7.88283	8.10062	8.51332	7.84504	9.15411	8.00598	6.87473	8.43642	9.17052	8.02155	9.02068	8.78279	7.74646	7.48825	8.33186	9.00739	7.09365	7.93099
ACVR1B	6.53462	7.92532	8.21392	6.5321	7.28501	6.1032	6.81421	7.45734	7.10243	5.82861	6.67477	6.67257	6.67512	6.27683	6.92219	6.71282	6.21998	6.92905	7.40379	7.3701	6.23657	6.66269	6.58057	6.10138	6.94696	8.03677	6.37566	7.00512	7.99254	7.29395	6.97684	6.88662	7.03917	7.25335	7.3902	6.4746	7.02519	7.76992	7.25647	7.06374	6.16164	7.42666	7.4065	7.41643	6.84762	7.39021	6.57057	6.99609	7.32085
ACVR1C	5.09049	4.02684	4.14969	4.22568	4.61808	4.25285	4.11493	4.11931	4.30553	4.0724	4.38907	4.25927	4.01919	4.00489	4.3004	4.41629	5.21952	4.6549	5.04785	5.577	3.90809	4.54669	4.49238	4.10895	4.01721	4.03729	4.96907	3.97832	4.05258	6.04727	4.38231	4.12242	4.60075	4.39545	4.50318	7.01048	7.17517	4.9062	3.9412	3.45765	7.43005	4.17414	4.02229	6.50559	4.21118	4.17316	5.04007	4.40363	7.3626
ACVR2A	7.0369	8.35136	6.1265	6.7576	7.47752	5.82725	5.28945	7.68549	6.3799	6.60859	6.59453	6.12616	6.81769	7.26087	6.79916	4.02605	6.52384	6.94065	7.33939	6.39255	6.74483	6.97187	7.24782	7.27069	5.73611	5.99472	6.15454	6.66986	7.2291	7.65039	7.24741	6.75046	5.41535	8.02203	7.08673	7.65204	7.07423	7.29285	7.25766	6.75449	6.59352	6.65091	6.83208	7.11381	7.0416	6.69759	5.70913	6.88068	7.47701
ACVR2B	5.35302	6.53427	6.09197	5.99041	6.00512	5.81785	5.86699	6.65763	6.96883	5.42967	5.82201	5.89788	5.60097	5.76948	5.62118	6.78716	5.62863	5.41225	5.46186	5.6227	5.9067	6.26408	6.05634	6.17312	5.84986	5.95689	5.95876	6.84981	7.14427	6.94424	6.07595	7.20591	7.11571	7.06596	7.30853	6.75836	6.76879	7.27605	6.83473	7.53815	7.10414	8.30178	7.309	8.13241	6.84468	7.81171	6.20061	7.83979	7.57549
ACVRL1	5.99422	5.49806	7.11603	6.06836	7.09429	6.09359	6.04291	5.7791	7.00722	5.27945	5.41814	5.26497	6.40732	5.22672	6.68492	5.86003	5.42693	5.55339	5.86506	7.22949	7.13383	5.23565	6.69905	5.20299	6.16536	7.21197	8.08036	7.12176	7.37871	6.59015	7.21495	6.24447	6.56291	5.62312	6.50892	6.8836	6.44921	6.37972	6.35602	6.3104	5.99803	5.99616	8.18491	5.15114	5.97038	5.57854	5.73033	6.20946	5.00745
ACY1	4.58627	4.55571	4.68585	4.63594	4.45349	4.52264	4.65151	4.5186	4.54441	4.48367	4.7014	4.67706	4.57481	4.46807	4.68223	5.00327	4.35881	4.53583	4.60142	4.53115	4.79693	4.55434	4.7871	4.50444	4.25037	4.49471	4.45017	5.09197	5.2291	4.96386	4.87719	4.49912	4.39381	4.45633	4.47721	4.83914	4.6683	5.07929	4.59014	4.19849	4.63867	4.76448	4.69242	4.78318	4.42226	4.33548	4.74626	4.81238	4.92343
ACY3	4.25837	3.90719	4.51246	4.28375	4.21441	4.1915	4.20052	4.34866	3.9592	3.81927	4.10958	4.36521	4.26571	4.19754	4.54076	4.82752	4.27099	4.06823	5.33347	3.97476	4.94604	4.0314	4.24873	4.29223	4.35357	4.22917	4.25697	4.17471	4.59447	3.90796	3.97025	3.95758	4.12197	4.10016	3.5617	4.10545	4.47212	4.49905	3.71623	4.87139	5.98858	4.11303	4.23266	4.20881	4.25378	3.69416	4.30354	3.84494	4.72001
ACYP1	6.77044	8.29103	7.49401	7.14576	7.64022	8.54316	7.77919	8.11903	8.00815	8.28046	8.3955	7.23823	8.68258	8.62848	7.40314	7.55911	8.31644	9.13717	7.11758	7.08865	7.98482	8.73077	8.05468	8.16419	8.07561	7.46891	7.40314	8.1756	8.07712	8.23108	6.97845	6.50849	8.42962	7.65878	7.70247	7.22681	7.42191	8.49833	7.43222	7.88407	7.65033	7.60787	7.10622	9.33041	8.35472	7.33138	7.89883	7.93226	7.59351
ACYP2	9.88768	8.37692	7.47866	8.60403	8.7386	7.34288	5.95888	8.32289	7.85302	8.06084	7.80381	9.82172	8.92462	8.82403	8.86349	5.86495	8.13748	7.77816	8.60906	8.13116	7.96759	7.94048	7.5293	8.73369	8.50741	6.95485	8.0564	6.26122	8.38753	8.36818	8.11951	8.30515	6.41681	8.46696	7.85955	6.99494	8.32174	7.45275	8.9349	7.54809	9.32381	7.0978	7.97943	6.35282	7.74654	8.70786	6.13738	6.73325	8.94854
ADA	5.22278	7.76915	6.20598	6.78177	6.55606	5.36645	6.75858	5.11552	6.6617	7.23989	6.92652	6.52976	6.07394	7.53666	5.49599	8.48508	6.12486	5.5508	4.81127	7.5028	6.14104	7.17717	6.45117	7.12856	5.80251	6.11841	7.84438	6.8054	5.82903	5.5912	7.57005	5.13091	5.47416	6.90177	6.41413	7.45359	6.6739	5.70009	6.08692	5.73759	8.11894	5.1834	8.4852	5.50423	5.62803	5.51215	7.59996	5.2971	5.55471
ADAD1	3.52798	3.50883	3.89927	3.83568	3.6105	3.55059	3.95436	3.69204	3.43357	3.61689	3.5617	3.57441	3.69204	3.63363	3.76281	3.75243	3.69817	3.61811	3.64053	3.50948	3.50831	3.51059	3.61546	3.64033	3.68418	3.76143	3.81179	3.58579	3.67286	3.22425	3.68557	4.01921	3.79617	3.62209	3.27977	3.24877	3.4087	3.53788	3.31583	3.53559	3.60582	3.8212	3.40349	3.58244	3.6033	3.55773	3.67251	3.59448	3.49071
ADAD2	5.23816	5.64564	5.56687	5.63904	5.6115	5.51526	5.92278	5.43345	5.48486	5.80967	5.67105	5.58719	5.56567	5.33605	5.67929	5.86459	5.85765	5.59465	5.49899	5.69637	5.66858	5.74436	5.70581	5.58935	5.56637	5.91255	5.60278	6.27826	5.89009	4.77055	5.74427	5.8278	5.40237	5.62905	5.7459	5.75114	5.86031	5.37468	5.40711	5.00529	5.28635	5.41425	5.64201	5.45222	5.55954	5.50694	5.6751	5.56999	5.70247
ADAL	6.72952	5.03661	5.70083	5.40926	5.51646	5.46852	5.12573	5.21267	6.20683	5.77423	5.17598	5.45243	5.40685	5.96557	6.35196	4.93686	5.3984	6.38731	6.53943	4.99314	5.40463	6.88587	5.73118	6.00763	6.82529	4.79749	4.85634	5.14271	5.88467	5.61179	5.32941	4.10329	5.92998	5.89165	5.37117	4.02756	5.51716	5.3687	6.19798	5.43314	6.19527	5.4394	4.17331	4.47891	5.28127	5.21111	4.91306	4.93038	5.60841
ADAM1	6.61994	8.3328	4.57975	4.93082	6.70724	7.08983	5.33006	6.87792	6.30775	5.69424	6.01047	5.43678	6.96381	6.32786	5.83338	6.14106	6.77788	5.73371	5.91207	4.63842	6.20246	6.43208	6.36617	6.17761	5.8868	4.73888	5.05085	5.38737	5.06612	4.97454	5.87046	5.41009	5.91295	6.72942	5.86801	6.76711	5.83162	6.48292	5.97456	7.06479	5.27941	6.29433	6.43307	6.0808	5.60077	5.6622	4.91338	6.32228	6.07529
ADAM10	7.12549	5.84954	4.51706	7.19992	7.58122	6.69982	5.21482	7.14514	6.14659	6.42175	7.72801	7.23863	7.35561	7.49569	7.16773	5.8166	7.49438	7.4555	7.08191	7.18549	6.41253	7.06824	6.42014	7.78261	6.71458	8.36379	5.50756	3.8993	3.64185	6.69369	4.93289	4.94574	4.46869	6.18977	5.36065	4.92231	5.4422	4.36036	7.02314	7.94516	6.16629	6.12584	6.09225	5.78563	7.05693	6.76506	5.21837	4.60655	5.66545
ADAM11	3.86979	5.11996	4.88481	4.51398	4.75146	4.36962	4.70991	4.77212	4.59226	4.53624	4.76053	4.79525	4.56548	4.72935	4.56493	5.2536	5.13625	4.47011	4.12012	4.23401	4.70351	5.26181	4.92866	4.86427	4.27363	4.83856	4.46227	4.45861	5.1941	4.28509	4.51619	4.67	4.84217	5.15745	4.31813	5.0947	5.25492	4.8147	4.4059	4.29712	4.8488	4.57937	4.926	4.95117	4.14141	4.48358	4.46252	5.32852	5.81437
ADAM12	4.99714	5.09485	7.00049	8.64358	7.51067	5.97998	7.91663	4.43636	7.75935	4.31797	8.16009	6.16992	6.70314	4.98273	4.39698	5.66711	9.1665	6.82139	5.1724	7.75902	6.27435	6.17179	7.43681	8.95095	7.91824	8.37886	9.38136	7.62791	6.15457	5.72664	8.73185	6.69494	5.42019	8.00847	6.02393	8.93814	5.031	6.53634	6.48264	6.70201	5.41548	4.12974	7.8103	4.626	6.62119	6.46857	7.84334	5.18771	3.73087
ADAM15	4.85631	5.05079	4.98455	4.86111	4.79538	4.62067	5.3631	4.33143	4.90091	5.26125	5.15043	4.80503	5.23515	5.13177	5.17155	5.75507	4.75877	5.12339	4.61998	4.62467	5.03947	4.73486	4.97418	5.14362	4.97222	5.17514	5.01392	5.42505	5.41941	4.68622	5.22273	4.86141	5.22178	5.53024	5.31457	5.7047	5.42865	5.18674	4.51884	5.12039	5.26004	4.9501	4.84513	5.27756	5.6806	4.56062	5.88485	5.10488	4.94503
ADAM17	6.22517	6.04171	4.52232	6.80851	6.99288	7.1051	5.69756	7.39031	6.02248	6.72819	7.56674	7.61969	7.12358	11.032	6.27515	5.70209	6.20794	6.60717	6.37501	6.67173	5.64953	6.11589	6.01842	7.18725	7.05696	6.58485	5.53385	3.78582	4.51391	4.46665	5.35907	5.60786	5.92561	6.3041	6.88237	6.33277	5.17007	5.16246	6.1811	7.11155	5.33171	5.52859	5.90554	7.06785	6.02375	7.43027	6.08028	5.18197	4.75821
ADAM18	3.16877	3.42639	2.99014	3.2576	3.03983	3.08683	3.1306	3.12198	3.0623	3.10084	2.91117	3.08021	3.10335	3.14989	3.17749	3.3683	3.2738	2.88859	3.01318	3.04246	3.18084	3.19168	3.17777	3.16443	3.11542	3.23292	3.01762	3.0314	3.07049	3.00823	3.24237	3.1233	3.29794	3.23317	2.84715	3.24161	2.91038	3.07944	3.01455	2.97247	2.89106	2.87478	2.94226	2.85759	2.95927	2.85118	3.08314	2.97971	3.08683
ADAM19	4.74455	5.509	6.84885	6.62634	6.07292	8.30945	6.38063	5.31662	5.86171	6.48487	5.69269	5.24964	5.5269	5.45557	5.20118	7.36787	10.4703	5.67206	4.87289	5.68492	6.21623	4.77564	6.24656	9.0736	6.36578	8.75953	6.90763	6.19364	7.99261	5.19561	7.42101	5.24202	6.43166	5.85564	5.92617	6.08069	6.42605	5.75531	5.94239	7.10611	4.79049	6.59366	6.71969	4.94002	6.41423	5.3116	8.82181	6.1124	6.39283
ADAM2	2.52488	2.88549	2.55699	2.65086	2.53215	2.59854	2.67104	2.56694	2.66256	2.63316	2.62401	2.60547	2.64016	2.48764	2.48508	2.61361	2.78582	2.61905	2.61053	2.58618	2.62537	2.48583	2.68108	2.73608	2.5425	2.51525	2.72653	2.74815	2.96072	2.65981	2.99684	2.64459	2.95449	2.56515	2.79603	2.7987	2.86098	2.66572	2.69416	2.55732	2.64527	2.49288	2.5976	2.56208	2.49479	2.36753	2.66613	2.77076	2.64131
ADAM20	4.06206	4.12229	4.4549	4.37942	4.29391	4.13883	4.64393	4.29768	4.21087	4.32286	4.16943	4.22181	4.29332	4.1745	4.21711	4.87574	4.35844	3.96237	4.26981	4.10555	4.19036	4.01838	4.15706	4.28524	4.06857	4.30741	4.12982	4.13489	4.55235	3.99698	4.30653	4.20854	4.39124	4.05224	4.2348	4.32268	4.76591	4.18043	3.94371	4.00167	4.09414	4.04426	4.0661	4.12505	4.38045	3.82861	4.40138	4.19687	4.2596
ADAM21	4.35658	3.6408	3.34033	3.69552	3.75781	4.09766	3.97516	3.64629	3.46037	3.62439	4.30411	3.95524	3.76549	3.65129	3.68748	4.28281	4.0008	3.61736	3.48264	3.61729	3.74462	3.99464	3.8245	4.28569	3.63054	3.86539	3.53847	3.41744	4.00359	3.66222	3.81174	3.725	3.84002	5.87178	3.33752	4.32312	3.44687	3.47369	3.54728	3.82724	3.2601	3.85196	4.37195	3.45734	3.71908	3.62523	3.69002	3.73211	3.80895
ADAM22	8.66666	8.70193	6.82723	7.1012	8.3782	6.52297	4.04148	8.08498	8.43641	8.16123	7.54461	6.52012	8.48381	7.7677	8.06706	6.08328	7.78156	5.82172	8.81208	8.31005	8.59754	7.29015	7.69349	6.61957	7.04631	5.28419	6.08766	6.83948	7.4598	8.2444	7.31111	8.27866	7.44259	8.43841	7.76882	8.00022	8.96435	7.34503	8.22127	7.12572	7.82402	7.49881	7.85148	8.23967	7.34128	7.49951	3.71214	8.27478	9.27967
ADAM23	7.42097	7.29608	6.28278	7.74665	7.18875	6.70158	5.97726	6.09703	6.68525	6.07474	6.55785	7.49787	6.41026	7.17266	6.5439	5.29767	4.87833	4.9013	7.29273	7.11258	7.55098	7.26384	6.95879	5.14826	2.99703	4.54911	5.13849	6.03449	6.16255	7.45929	5.1781	6.85713	5.51805	7.53451	6.77286	6.51046	7.29272	6.00494	7.53999	5.40038	6.66923	6.8258	6.66911	6.78415	5.85217	5.99006	2.75828	5.84526	7.11384
ADAM28	7.52725	5.40101	6.16266	7.01274	6.06124	6.01568	6.0677	4.23737	4.95308	7.53371	4.53525	8.47818	5.12324	6.10428	7.64104	4.81498	6.10262	5.47209	8.12181	7.57502	6.28381	3.94173	5.87213	6.2548	6.44199	6.69661	6.54941	4.31228	4.17007	5.01551	6.79658	5.42038	3.65076	5.5267	5.73046	6.39099	6.90053	5.96783	6.51597	7.5751	7.51765	4.55518	6.31838	4.97881	5.01069	4.02711	5.40379	5.23744	5.53666
ADAM29	2.83488	2.68797	2.98761	2.84626	2.99825	2.63237	2.82274	2.73969	2.7053	2.79181	2.73726	2.76542	2.86969	2.54897	2.72794	3.01374	2.90491	2.77109	2.55442	2.6979	2.73508	2.77195	2.82898	2.76983	2.72358	2.8253	2.96407	3.09972	3.19529	2.66005	2.97863	3.16045	2.90339	3.21506	2.71933	2.92586	2.78632	3.04237	2.70942	3.02166	2.90339	2.74639	2.76252	2.67227	2.65356	2.73975	3.03127	2.92261	2.78089
ADAM30	4.19114	3.96009	4.35815	4.03827	3.92032	3.9422	4.24453	4.03268	3.88964	3.96871	4.0057	4.14317	4.01498	4.01017	3.68642	4.23158	4.03174	3.71606	3.83893	4.16275	3.98422	4.38465	3.97818	4.10074	3.90689	3.89257	3.76054	4.56821	4.83761	4.02381	4.55334	4.40657	4.54198	4.08409	4.08553	4.053	4.08965	4.22676	4.21025	3.60506	4.07532	4.25927	3.80742	4.06754	4.00925	3.86637	4.03456	3.99787	4.21246
ADAM32	2.98814	2.72346	3.71514	3.0093	3.33432	4.21132	3.21672	2.81802	3.42099	3.57103	3.36974	3.03342	2.98127	3.22425	2.82543	3.2339	3.04917	2.9936	3.10079	3.10527	3.27755	3.96547	2.92895	3.93264	3.20696	2.7268	3.54513	3.45071	4.2839	3.06121	3.69054	3.37253	2.9417	4.24281	3.09607	3.08986	3.16164	3.31424	3.29297	3.43057	2.91271	2.59559	3.09551	2.8802	3.20458	3.3821	3.2283	3.16751	3.00626
ADAM33	8.20359	7.48759	8.55699	7.58205	6.62743	7.13022	8.70933	7.5644	8.0993	6.6226	7.21176	7.29301	6.34312	7.43006	7.20803	7.6862	7.40061	7.6243	7.03854	6.76432	8.47895	6.93392	7.41649	6.24039	7.19468	6.84019	7.93133	8.94633	8.72691	7.96553	8.48215	8.8158	9.23716	8.08985	8.24518	8.04991	8.20453	8.21566	8.56967	8.24227	8.14405	8.63783	8.19027	8.3631	7.74623	8.34092	7.9567	8.43863	8.4484
ADAM3A	2.93101	2.89915	3.05226	2.98779	2.70503	2.93063	3.23144	2.88006	2.77472	2.91536	2.67057	2.85499	2.87243	2.91961	2.82866	2.95018	2.81679	2.99432	2.94438	3.03341	2.92558	3.03037	2.86754	2.87625	2.82476	3.0458	2.91201	3.1967	3.60934	3.12586	2.81665	2.95809	2.88704	3.13818	3.12042	3.02896	2.80324	3.09774	2.75953	2.94909	2.93082	2.98356	3.05577	3.14342	3.01285	2.93429	3.16631	2.85838	3.25228
ADAM5P	3.32277	3.29621	3.58668	3.50552	3.47016	3.23237	3.78807	3.23723	3.29799	3.41914	3.42324	3.48682	3.11046	3.33359	3.4165	3.60042	3.43785	3.2606	3.53866	3.20457	3.31196	3.37833	3.3297	3.44393	3.08966	3.42137	3.5532	3.44549	3.85778	3.28607	3.53818	3.33246	3.5784	3.34452	3.10404	3.49347	3.81678	3.18854	3.43098	2.94909	3.3899	3.34369	3.24467	3.06905	3.456	3.39718	3.3281	3.62724	3.51412
ADAM6	3.9836	4.21312	4.48724	4.15846	4.20967	4.05356	5.06708	4.14619	4.52443	4.31256	4.37914	4.28691	4.22941	4.08068	4.15535	4.84612	4.5827	4.20672	4.27792	4.10417	4.26115	4.07578	4.27902	4.37439	4.50686	4.55087	4.30799	4.33873	4.34501	3.98443	4.13546	4.35162	4.46792	4.22135	4.33986	4.08341	4.48197	3.86129	4.05356	4.06825	4.01915	4.49042	4.18597	4.37415	4.40679	4.81868	4.27065	4.15609	4.31909
ADAM7	3.28767	3.65681	3.72591	3.61665	3.34101	3.33941	3.5138	3.43036	3.58689	3.4369	3.37966	3.50906	3.37722	3.20077	3.36323	3.82316	3.74655	3.3236	3.29417	3.15512	3.35447	3.31976	3.49243	3.57556	3.2957	3.59562	3.32602	3.35312	3.78884	3.10341	3.52104	3.32631	3.4172	3.02072	3.24239	3.41444	3.30869	3.60721	2.9441	3.18151	3.35427	3.22227	3.21885	3.16255	3.08817	3.69097	3.35396	3.2831	3.29209
ADAM8	5.44445	5.57694	6.36647	6.87672	5.61024	5.15059	7.55562	5.74654	5.82756	6.25801	5.6794	5.69115	5.69625	6.59639	6.17372	6.51862	5.50649	6.99254	5.60282	7.30579	5.58675	6.04474	5.82055	5.68938	6.12225	7.90764	5.9336	6.40751	5.45015	5.1985	6.08476	6.24223	5.71118	5.37016	5.5189	5.19573	4.87182	5.28811	5.57119	4.49909	4.90959	5.7902	5.73497	5.3824	5.20655	5.9532	8.48666	5.79416	4.37032
ADAM9	7.51978	4.19639	4.74499	7.42103	7.09059	7.95887	5.66693	7.53627	6.50587	7.35052	8.41866	7.7312	7.59477	7.18826	6.44578	8.12848	7.77856	7.58974	6.38411	6.6756	6.68416	6.68419	6.60587	8.18119	7.29531	8.34411	5.86546	4.3265	4.22072	5.86794	5.78654	6.4034	5.07692	6.0498	7.08937	5.30387	5.52146	4.37123	7.3455	8.08496	6.01947	4.77931	6.2145	5.14423	7.11969	8.27912	6.59382	4.35825	5.12581
ADAMDEC1	4.6337	7.19206	3.52166	4.26042	3.81843	5.28008	3.15893	5.72271	6.01319	3.81911	4.27982	5.85838	3.66287	6.71713	3.21932	3.45526	3.92257	4.24896	3.13089	4.25538	3.43249	4.21705	5.29683	6.10719	5.58431	3.80906	3.57238	4.71999	3.45834	3.39692	5.17784	3.17748	3.36809	3.85258	6.34229	6.33596	3.03546	5.75315	6.92624	2.97071	2.88783	5.08091	5.1556	3.6239	5.61474	4.32388	4.72624	3.77236	3.01253
ADAMTS1	6.47689	6.89309	7.13591	9.78593	7.85576	7.69564	5.73186	6.90631	4.91343	7.56328	6.58621	7.15335	7.12582	7.09467	7.1996	7.40745	9.59864	7.22806	6.01426	8.14266	7.70862	8.23642	7.37312	6.48939	9.64819	8.42612	9.34988	5.93012	6.27313	8.91874	8.92708	6.44333	7.15837	5.86149	7.8547	5.83558	9.15726	7.09226	7.26282	6.96549	8.086	6.43267	7.92429	6.13304	7.00578	5.40104	7.17074	7.00733	5.90932
ADAMTS10	4.54796	5.84	5.95187	4.96428	5.50362	5.62958	5.7086	5.62163	5.72669	5.30372	5.19388	5.54838	5.30251	5.15644	5.25915	5.33334	4.95153	5.51702	5.45736	5.3384	5.74347	5.40928	5.83083	4.72582	5.19842	5.14589	5.88901	5.96865	6.94011	5.25652	5.98009	5.87833	6.16523	5.90735	5.79133	6.00388	6.15722	6.05773	5.89119	5.58987	5.88824	6.64527	6.07826	6.2209	6.00968	5.72131	6.45012	6.14155	6.36978
ADAMTS12	6.01945	5.94149	5.43466	6.50327	6.08945	5.5498	5.68515	5.12859	6.13951	5.77601	5.20521	5.81838	5.3777	5.08702	6.00557	6.18166	8.31975	5.19529	4.99624	7.10909	5.25414	4.98029	5.7287	5.79492	6.26326	7.62845	7.58023	5.09053	5.06612	4.9121	7.41044	6.39096	5.00412	5.82976	5.89285	6.00066	4.70662	5.61264	5.28442	7.06269	4.75834	4.8488	6.77775	5.44942	5.65339	6.5282	7.45107	5.03313	4.90732
ADAMTS13	5.4878	5.55438	6.17303	5.33823	5.55697	5.19271	6.08327	5.30101	6.76921	5.45741	5.21855	5.5012	5.6445	5.58539	5.25977	5.88586	6.03635	5.47386	5.50534	5.33996	5.80263	5.63571	5.97778	5.69226	4.89068	6.1925	5.96665	5.59177	6.45379	5.31176	5.53927	5.28987	6.4532	5.45379	6.11581	5.68938	5.52757	5.7095	5.36749	5.36753	5.57486	5.58808	4.99505	5.76143	5.52728	5.18421	5.20623	5.40608	5.58821
ADAMTS14	4.85553	4.82505	5.33089	4.95338	4.77324	4.81597	6.35535	4.80013	5.07035	5.03911	5.24171	5.00609	4.7793	5.02661	4.74209	4.94215	5.30829	4.5218	4.73109	5.31074	5.5189	4.69102	4.9105	4.72438	4.78254	5.26686	5.64714	5.52405	5.85313	5.13915	5.47829	5.62705	5.45676	5.10353	5.39074	5.37607	5.35744	5.59385	5.22852	5.36699	5.47488	5.09678	5.56459	4.83807	5.23158	4.79758	5.74734	5.29052	5.18683
ADAMTS15	5.30167	5.32062	6.40743	5.58785	6.98391	6.8158	5.10461	4.26035	7.68766	9.46285	7.3082	7.729	6.02521	6.35724	6.97119	7.53787	4.21426	6.0243	4.73248	4.70302	5.33196	3.94413	6.83193	6.67094	4.56328	5.88227	6.20452	8.35241	4.77899	5.89533	6.10108	6.73951	4.42959	5.15745	6.87046	4.70172	4.97962	5.12608	8.39362	4.74239	4.63312	6.61082	5.56935	4.4856	4.57754	6.74648	4.54939	4.3903	4.09025
ADAMTS16	3.74158	3.76506	4.05102	4.02575	4.00341	4.4104	4.09049	3.83312	3.91856	4.03979	4.05292	3.91949	4.20521	4.15715	3.88704	4.86497	4.07633	7.44625	3.9615	4.14854	4.04999	4.18138	4.58804	4.41917	3.82128	4.20836	4.41403	4.22731	4.27759	3.6242	3.78929	4.38389	4.05176	4.02563	3.98364	4.10456	4.1283	3.95603	3.51535	3.81804	3.79181	3.5233	4.52362	4.1764	4.25378	3.34628	4.37996	4.11885	4.16635
ADAMTS17	6.97176	7.41976	4.39604	4.49221	7.5293	5.87154	3.88227	5.28749	3.17036	3.89204	3.88084	4.59859	5.93843	4.44139	4.93233	4.17649	4.26457	5.69425	6.85227	4.10023	5.41288	3.72772	6.12619	4.17607	3.99379	3.74631	3.9408	3.80602	5.17896	5.17662	4.3117	5.36615	4.26468	4.84251	4.12485	5.7444	5.73863	4.82625	6.10493	3.99915	5.88627	4.19246	5.37516	4.01906	4.43453	3.88919	3.99166	4.64753	4.46338
ADAMTS18	4.10961	3.86482	4.75415	4.68426	7.35243	5.6994	4.5465	6.38839	6.10084	4.99122	4.08569	3.92812	4.37793	4.17365	3.96416	5.82631	5.61368	7.83375	3.89071	3.82616	4.33164	4.25487	5.28895	8.41893	9.11611	5.62238	7.69213	5.03267	4.29366	3.69508	8.66407	3.88177	5.94254	6.45194	4.48764	4.51614	4.7248	4.8143	3.9295	5.54725	6.87866	4.58631	4.73726	4.37869	5.74832	4.71359	4.04479	7.46278	5.86454
ADAMTS19	3.55142	3.47265	3.69047	3.48051	3.86069	4.09714	3.51187	3.42938	3.54217	3.44957	3.493	3.47415	3.25347	3.56693	3.46188	3.88383	3.56301	3.48565	3.25322	3.50676	3.60017	4.10909	3.398	3.28373	3.55879	3.68007	3.67495	3.59336	3.69576	3.88611	3.88507	3.39601	3.37622	3.81234	3.73842	3.4105	4.51514	3.5118	3.83443	3.58037	3.88138	3.48364	3.53947	3.41993	3.30606	3.75246	3.71221	3.42197	3.89548
ADAMTS2	3.68298	3.49562	4.11718	5.52655	3.9408	3.60571	4.60054	3.38071	3.32295	4.9363	3.56678	3.68286	4.6387	3.69679	4.00597	5.42277	3.57428	3.35667	3.69531	7.32153	3.73486	3.84424	4.91265	5.70749	7.04406	5.05043	7.61845	3.80856	3.87103	3.35778	7.51796	4.02237	4.20829	3.65403	3.90084	3.6913	4.02839	4.4278	3.91691	8.12183	3.32409	3.97343	4.51596	4.05696	3.70838	3.38088	7.03801	4.21231	3.3184
ADAMTS20	2.61791	4.01402	2.72409	2.78473	3.08628	2.84591	2.67901	2.75745	2.71463	2.79273	4.70942	2.7602	2.71808	2.57516	2.76908	2.77491	2.85645	2.5968	2.59748	2.74481	2.81315	2.53934	3.58041	2.90354	2.55575	2.64563	2.70999	2.68085	2.81456	3.99316	2.65895	2.54034	2.67914	2.60127	3.15445	3.96652	2.64281	2.79617	2.72503	2.81499	2.61723	2.8318	2.56769	2.75258	2.79983	2.75594	2.72851	3.00355	2.65881
ADAMTS3	9.78118	5.66203	7.26561	7.82294	7.18356	8.87537	3.22094	7.38387	6.42736	6.07474	3.35574	7.30569	4.56239	7.20449	3.08387	7.62167	9.13431	7.84992	3.30575	5.08033	3.91069	5.30219	8.06283	8.95349	7.64309	6.37012	4.38832	3.00825	11.0733	5.54477	6.25865	5.39412	9.15964	4.07134	6.0845	7.02784	7.45254	8.21013	5.3503	10.1943	4.61176	6.18864	3.57557	4.06257	5.0536	8.48849	6.64541	5.74223	5.6229
ADAMTS4	4.46377	4.51901	5.09149	4.64696	4.59126	4.48636	4.42708	4.66559	4.41713	4.42371	4.57488	4.71198	4.38625	4.35799	4.45357	5.39319	4.64234	4.39393	4.51853	4.38926	4.52886	4.49094	4.37684	4.8251	4.36322	4.4749	4.67338	5.03253	4.95896	4.75798	5.01213	5.17489	4.65671	4.71205	4.45754	4.6803	4.60483	4.84212	3.80832	4.38843	4.6057	4.29512	4.40979	4.19906	4.73924	4.34615	4.67919	4.6909	4.68873
ADAMTS5	4.28044	4.27633	5.04058	7.33871	6.10411	7.74212	4.88665	4.2103	4.26824	5.95744	3.89839	7.17874	6.76192	7.44706	7.11699	4.46836	7.52918	6.22167	6.27134	7.99053	7.05282	7.82887	5.28234	4.62714	5.53877	6.02322	8.2923	5.20431	5.79487	5.96332	7.79215	6.74997	4.44018	5.41875	6.08061	3.11458	5.29406	3.68857	7.05191	4.50868	5.01738	3.13144	5.69206	5.62394	5.28644	4.35242	5.93487	5.4647	4.45732
ADAMTS6	6.01607	6.15013	4.31286	5.5693	5.69871	7.64674	4.6317	6.75702	8.37574	6.42166	6.31102	5.08598	6.36029	6.61191	6.47835	4.22122	5.17603	4.7178	4.91305	4.40643	5.89395	5.78243	6.37704	6.5839	4.25931	7.04885	4.58673	3.90002	5.38324	5.59651	5.30863	6.80718	7.50891	3.50817	5.74759	4.45503	5.07083	5.52352	5.02414	5.15063	4.56759	5.58999	3.85764	5.06959	4.30652	7.55149	7.70701	3.97889	6.66825
ADAMTS7	4.74327	5.01648	4.9534	4.90633	5.01163	4.82508	4.27031	4.77212	4.76575	5.09173	4.78457	4.74631	5.10387	4.67671	4.69679	5.20205	4.78241	5.09461	4.87184	5.17656	5.01186	5.35942	5.03901	4.67539	5.3047	5.04714	5.17875	5.31103	5.95064	5.15152	4.94645	5.60945	5.49775	5.99822	5.42423	5.19567	5.19466	5.8511	5.46759	5.49186	5.11444	6.58456	5.95545	5.40762	5.56417	5.29997	5.15247	5.11084	5.1922
ADAMTS8	7.47485	4.98479	5.54999	5.13398	5.68811	5.56701	5.31317	5.80308	4.94932	5.91961	4.79753	5.20377	5.26894	5.84449	5.42686	5.36037	5.42412	5.93668	5.54825	6.82744	5.83624	4.61321	5.20304	5.11628	5.31758	6.04413	6.27114	5.17734	4.67557	5.70592	5.54459	5.34729	4.87359	6.33656	5.03452	6.30914	7.1609	6.39628	7.71799	4.29685	6.40738	5.86925	6.26237	4.72836	5.28854	4.64066	4.97199	4.81892	7.49326
ADAMTS9	7.26839	6.14437	9.34151	8.16968	7.9361	9.07563	7.73675	6.297	7.4069	8.00257	8.9555	7.13488	7.96639	6.22348	8.37948	7.25072	8.75042	8.39911	6.75735	8.50198	8.21167	6.9843	7.43156	6.7271	6.22732	6.08591	7.80869	5.22008	10.0722	7.50724	7.50339	7.32254	7.94576	6.13987	8.84879	5.33655	6.44981	5.52427	7.85376	8.66677	6.13591	7.1818	6.97851	7.33045	6.66029	7.10799	5.38427	8.20644	6.3449
ADAMTS9-AS2	5.4332	5.34048	8.81999	5.57785	5.21505	5.96642	5.93415	6.56639	7.50353	5.0745	6.15002	4.82195	4.83438	4.5839	5.51887	5.44699	5.78474	6.92536	6.20303	6.83152	7.58163	4.93556	6.68757	5.0296	6.66036	6.42388	6.02128	5.35098	7.60122	5.86368	6.3203	5.98711	7.9035	5.40759	6.86737	4.55049	6.71757	5.12807	7.19051	9.19487	6.55005	6.75683	5.72521	5.43719	4.98755	7.31038	4.43127	6.04017	6.43487
ADAMTSL1	6.66586	4.52149	4.47527	5.27548	4.52043	4.67474	5.80698	5.38237	5.22882	4.99145	4.38156	4.78588	4.49519	6.1612	6.05585	4.58005	7.28501	5.08123	4.60713	5.25272	5.29608	5.08304	4.54411	6.30004	4.36733	11.0368	5.0494	6.69566	4.128	4.59105	6.10081	5.13608	5.01694	4.43284	4.50714	4.15984	4.36421	3.91602	4.23203	5.99177	4.50855	5.8629	4.36702	5.06959	4.41256	6.20322	8.39742	4.74805	4.76023
ADAMTSL2	4.15587	4.02197	4.53778	4.18082	4.14965	4.25444	4.60054	4.04455	4.51582	4.38871	3.90528	4.33341	4.63032	4.35207	4.17017	4.29788	4.21733	4.22502	4.13268	4.15183	4.62748	4.3618	4.27125	4.06647	4.29075	4.20125	4.93378	4.71242	5.45156	4.71844	4.52199	4.63522	4.47364	4.61017	4.85256	5.21133	4.73301	5.11018	4.51155	4.59816	5.39912	4.64398	5.30897	4.17211	4.4423	4.04188	4.10083	4.46807	4.97935
ADAMTSL3	9.50154	4.01944	3.89364	4.75036	4.61269	3.78763	3.97878	3.79349	4.16725	3.78147	3.79945	4.29397	3.86641	3.82844	5.68885	3.68142	4.1228	5.57322	3.71908	4.22161	3.93093	4.13631	3.73735	4.20222	3.76344	3.78864	5.34931	4.05386	3.81486	3.81572	4.29166	3.61545	3.90646	3.96841	4.00323	4.27698	4.57025	3.68857	4.68041	5.63574	6.00599	3.71761	5.46063	3.67353	3.80785	3.37966	3.47718	3.82105	4.0156
ADAMTSL4	3.97257	4.08361	4.25798	4.29347	3.90588	3.67647	4.35342	4.08025	4.17046	3.54233	4.13439	3.97399	3.97315	4.1477	3.96725	4.53168	4.09065	3.73722	3.89374	3.9249	3.91694	4.12731	3.9379	4.05794	5.85335	4.14056	4.02768	4.5246	4.12523	3.95572	4.24247	3.7953	4.26421	5.66123	4.78639	3.85802	3.90529	3.93732	4.98091	3.82058	4.26003	4.38076	4.29335	4.08349	3.91316	4.27788	4.37055	3.94326	3.91694
ADAMTSL5	4.87378	5.24018	5.40757	5.05812	5.19413	4.99249	5.60963	4.98086	5.10318	5.30019	5.10544	5.14015	4.90436	5.04865	4.86911	5.71277	5.02321	4.72193	5.01547	4.9456	5.31317	5.24594	5.15112	5.33419	5.12883	5.2947	5.19003	5.36933	5.90675	4.88347	5.53311	5.23138	5.01013	5.25161	4.94574	5.23323	5.04742	5.64461	4.87693	4.9456	5.13716	5.14568	4.86678	5.06638	5.08975	4.84525	5.52992	5.46262	5.32795
ADAP1	6.75568	7.47311	7.12009	7.07661	7.32808	6.14974	7.22371	6.07552	6.52393	7.28434	6.26108	7.00918	6.53703	6.14375	7.06261	6.69898	7.86271	6.26205	6.73699	7.23731	6.73757	6.75259	7.08153	6.256	9.10529	6.99366	8.48115	6.6455	7.54731	7.05547	7.70273	7.26329	6.68056	7.58719	6.92304	7.75063	9.32964	8.77821	7.68921	6.67198	8.92664	6.68914	7.65075	7.20813	6.60041	6.2002	6.72787	8.07214	9.49422
ADAP2	6.91431	5.78429	7.45322	6.64218	6.09418	6.12684	8.35129	5.10302	6.25418	6.28337	5.21551	6.86219	5.82473	5.78203	6.71218	5.98774	6.12609	5.79551	6.42281	7.36055	6.64854	5.15453	6.15543	5.94609	6.73349	7.07703	8.45301	7.37065	7.90899	5.7806	9.06367	7.97072	7.27535	6.58212	6.83085	7.51704	6.88362	7.70478	7.45833	7.99533	7.44738	5.88771	8.29512	5.47089	6.61464	5.60191	5.9305	6.39691	5.87481
ADAR	10.5297	10.4934	9.75139	10.2926	10.0978	11.0594	10.1941	9.7155	9.92015	10.2618	10.3226	10.5193	10.8148	10.6856	10.1797	10.5295	9.86685	10.7606	9.94061	10.164	10.3369	10.839	10.0419	10.2749	11.2171	9.75329	10.0822	11.495	9.18711	10.8824	10.6006	10.9137	11.5919	11.0754	11.2457	10.9873	10.511	10.8406	10.5629	10.5018	10.4093	10.9332	10.5498	10.6028	10.3246	10.4809	10.6733	10.4206	10.7982
ADARB1	6.22997	7.51352	6.43915	6.79899	6.75592	5.25492	6.13076	4.46289	6.24488	5.77905	5.05518	6.7469	6.30701	6.08872	5.79564	5.45604	7.60175	7.03949	6.15047	7.2749	6.70833	5.79343	7.37637	6.00016	7.00343	6.56935	6.5328	5.44133	6.15214	7.04911	7.00539	6.51192	5.11209	6.2287	5.82068	7.04493	7.9255	6.90849	7.09477	7.40453	6.20621	5.45394	7.23411	6.33502	7.04475	4.63905	6.46743	7.53876	8.22976
ADARB2	3.88632	4.26377	4.66277	4.02462	5.39798	3.8368	3.91971	3.71523	3.97614	3.58481	3.56651	4.36355	3.72383	3.77098	4.49147	4.17407	4.00327	4.60645	6.86137	6.11747	4.84276	3.74168	4.00436	3.41717	3.87681	3.71935	4.71626	4.2242	5.75716	4.40028	3.99958	4.94574	3.88505	4.27826	4.02593	3.89967	4.82819	5.22892	5.82339	4.1408	6.8597	3.76268	4.49903	3.86236	4.8987	3.83696	4.06683	4.25466	4.76247
ADARB2-AS1	4.52072	4.50095	4.52967	4.52287	4.2544	4.22059	5.03622	4.68317	4.85761	4.64501	4.4149	4.7768	4.36531	4.42324	4.58833	4.76599	4.56548	4.48663	4.39459	4.48351	4.48668	4.34545	4.66156	4.67116	4.60033	4.68773	4.9666	4.37425	4.73044	4.30943	4.71149	4.44539	4.49623	4.33109	4.4273	4.47127	4.54001	4.76366	4.41953	4.39595	4.56869	4.2586	4.30555	4.3677	4.37282	4.2364	4.63938	4.64682	4.77713
ADAT1	6.34251	6.81891	5.45637	6.93396	6.44041	6.75579	6.08407	6.96336	6.29654	7.04796	6.86007	7.05856	6.98807	7.61669	7.04096	6.44483	6.07152	5.80006	7.18398	6.61758	6.1554	7.3393	7.24239	7.29089	7.18178	7.28781	6.52333	7.21983	5.47438	6.60207	6.59173	6.45697	6.96727	8.0881	8.25604	8.29269	6.94307	7.09164	7.11107	7.07947	6.93407	7.48071	7.03514	7.31398	7.50434	7.10611	8.21931	6.86025	5.78349
ADAT2	6.25902	5.47812	5.70523	5.17605	4.65471	6.66477	6.25633	4.8953	6.47924	5.56513	6.2565	5.03971	4.86542	5.84406	5.99972	6.80472	4.56378	4.54301	4.73974	4.92691	5.76512	6.32257	4.91143	6.83067	6.00093	5.02091	6.65564	5.21092	5.51895	4.86471	4.78875	5.09389	5.5162	4.94719	5.67059	6.019	4.68073	4.3695	4.53072	5.55136	4.50631	4.94875	5.21521	4.84645	5.64658	6.24408	6.12866	4.72235	4.77342
ADC	6.85413	6.39529	6.78384	6.89194	6.50153	6.0618	6.39449	6.50877	7.19126	6.69884	6.21735	7.00233	6.42739	6.14887	6.20532	6.54112	6.7482	6.11391	7.13826	6.88437	7.40831	6.30433	6.5069	6.15739	6.77093	6.10382	7.25692	8.70042	6.64369	6.08161	7.27621	6.98641	6.46379	6.49077	6.53686	6.38303	6.99252	6.8146	7.41392	6.95151	7.25564	6.01538	6.73455	6.31223	6.20238	5.87265	6.27669	6.3792	7.09335
ADCK1	6.04598	6.29435	6.24277	5.82796	5.65942	6.23169	6.65136	5.23539	6.85249	6.34229	6.37108	5.84343	6.22945	6.11591	5.73255	6.04523	5.77128	5.71639	6.16789	5.66933	6.74325	6.4817	6.13765	6.54344	5.88348	5.7423	6.89472	7.32224	6.71266	6.85728	6.22897	6.03525	6.59532	6.84273	6.30453	6.70099	6.71325	6.96796	6.54992	6.30344	6.98136	5.57266	6.60007	5.82077	6.51664	5.54364	7.04237	6.37428	6.62199
ADCK2	7.03941	6.71646	4.99519	6.93336	6.93249	6.50489	6.0784	5.61684	5.78	7.06849	7.05734	8.0827	6.43539	6.75888	6.15372	6.06401	6.8808	5.42268	7.50132	7.10413	6.59734	6.75248	6.09635	6.01151	5.79061	7.45339	6.64566	8.10403	4.48545	6.28287	6.98963	6.96038	5.95818	6.8501	6.24517	6.72866	6.28545	7.16223	6.79776	6.41764	7.02252	5.4147	6.25756	6.65317	6.00073	5.51569	7.21573	6.22317	5.8915
ADCK3	7.60566	9.1009	8.74336	7.78247	7.91866	6.96262	7.16289	8.1558	7.60133	7.97518	8.38146	8.38345	7.76275	8.25575	8.03944	8.35857	7.6165	8.05654	8.65088	8.84906	8.90225	7.62467	8.27557	8.85774	8.10866	7.70775	8.67585	7.45907	8.65144	8.5203	7.60711	7.77427	7.79741	9.5647	8.41949	8.66966	7.78159	7.73687	7.68979	7.5706	8.17843	6.81485	7.72752	7.32694	7.96727	7.14914	7.03468	8.13636	7.94206
ADCK4	4.1815	3.88057	3.99714	4.24802	3.65606	3.9074	4.0519	4.00758	4.07875	3.43092	4.11106	3.95195	3.79092	4.15151	3.86139	3.74178	4.07633	4.11016	3.75185	3.80538	3.80016	4.26479	3.88875	3.96314	3.65363	3.63689	4.00409	5.09455	5.05805	4.43333	5.57635	5.00074	4.74744	5.49496	4.46972	5.1759	4.66839	5.01051	4.57991	4.65063	4.61447	4.97457	4.16434	5.56508	4.89702	4.94862	4.81384	5.12409	4.46186
ADCK5	4.66906	4.59679	5.07497	4.48084	4.60511	4.9872	4.87758	4.21847	4.90821	4.87198	4.49073	4.68969	4.6311	4.55202	4.64574	5.04184	4.69134	4.19286	4.90821	4.79896	4.91022	4.52554	4.99977	4.71138	5.60169	5.07803	4.36547	5.85403	5.32622	4.66705	5.14327	5.86294	5.70083	4.94475	4.61034	5.03985	5.07189	5.49509	5.32442	4.68213	4.57588	5.04636	5.47768	5.41562	5.22982	4.88958	5.41609	5.16441	5.49751
ADCY1	4.16725	7.25258	5.97602	5.3851	8.24552	6.61082	3.85502	7.06249	7.3738	6.83187	5.15848	7.9354	7.11436	7.25718	4.78781	6.45996	7.94008	5.38639	6.64234	7.85468	9.20288	6.62001	5.52591	6.93763	4.30139	3.81953	5.79405	3.61095	6.01437	6.94064	5.25127	6.91377	7.35721	7.66297	6.94947	7.03071	9.61419	7.7878	7.02799	6.62502	7.48219	7.17928	7.11589	8.15718	6.25511	6.76648	3.2406	8.38477	10.0588
ADCY10	3.55957	3.46192	3.75164	3.53658	3.21243	3.7201	3.84807	3.24367	3.31418	3.38178	3.52879	3.43598	3.28947	3.30744	3.71069	3.74081	3.64731	3.38375	3.48309	3.45221	3.41516	3.41108	3.5801	3.22584	3.5267	3.25512	3.4749	3.85994	3.3381	3.35757	3.37232	3.91908	2.97183	3.28255	3.22702	3.22876	2.97018	3.00258	3.30612	2.84858	3.18508	3.29635	3.1351	3.22295	3.39974	3.42542	3.44171	3.27008	3.38572
ADCY2	9.55081	8.48495	8.61386	9.27272	9.19676	10.1865	6.34172	9.94384	6.09358	9.1279	10.4117	8.26389	6.328	8.71253	11.0614	9.52058	8.59616	10.7133	9.75746	7.96481	6.30662	5.19537	7.63075	7.4997	9.19129	6.16466	8.62919	8.86466	6.01252	7.98797	9.09083	10.0357	6.54189	8.12043	8.47317	6.98467	9.51557	7.85932	10.3138	8.07923	10.0398	8.22983	8.08976	6.6128	6.42667	5.31582	4.33811	7.74503	10.3651
ADCY3	6.21936	6.71642	4.16272	6.34684	6.37875	6.39462	6.21581	5.7113	5.96511	6.11763	6.41682	7.2772	5.85244	6.63422	5.57086	5.72331	5.64605	6.29596	6.98012	7.16829	6.39987	5.89482	5.91948	5.56531	6.62363	5.69365	6.41814	7.09345	5.0973	7.34325	7.51674	7.08855	6.4584	6.33007	6.10447	6.97782	6.99246	6.6065	7.07058	7.00336	6.97799	6.81832	6.78042	7.16284	6.99688	6.58378	6.54552	6.6761	5.96879
ADCY4	5.56981	5.90503	6.57463	5.88719	5.97852	6.04088	6.47539	5.59184	6.86876	5.49415	6.01391	5.5132	5.8304	5.56569	6.20636	6.7109	6.29876	5.53169	5.97845	6.27142	6.95675	5.70969	5.91421	5.643	6.10262	5.76659	7.26009	6.90626	7.55809	5.62227	6.80656	6.15522	6.63524	5.85102	6.50892	7.21964	6.5085	6.38854	6.76384	5.94473	6.41469	6.09858	7.62015	6.27779	6.41278	5.95985	6.19455	6.20636	6.68118
ADCY5	4.66497	4.55571	4.42786	4.40349	4.49857	3.83578	4.35387	4.08521	4.19476	4.17546	4.21071	4.11118	4.14779	3.84223	4.36206	4.61487	4.28942	4.1702	4.44598	4.13617	4.47826	4.00084	3.8648	4.04396	4.58115	3.70456	4.22826	3.67666	5.08557	4.93862	4.18724	3.98639	4.20418	4.43467	4.57943	4.95821	5.60734	4.65776	5.21394	4.26589	6.43098	4.30927	4.29121	3.95917	4.63456	4.12916	4.27572	4.25295	5.28405
ADCY6	6.98619	7.08947	7.26745	6.51906	6.8606	6.9553	6.81647	6.40462	7.06733	6.99387	6.58705	6.47167	6.90299	6.3894	6.54753	6.96443	7.27118	6.66517	6.45693	6.61274	7.37842	7.01984	7.07937	6.77992	6.2055	6.10991	6.59986	7.143	6.39932	6.56297	7.14602	6.69042	7.11037	7.10713	7.3542	7.28866	7.35211	7.30762	7.45713	7.54289	6.9814	7.20997	7.1537	6.26748	6.57351	6.73244	6.79171	7.08294	6.77753
ADCY7	7.09914	7.4017	6.11044	7.76758	6.43195	6.47313	7.4121	3.64048	6.34065	7.14527	5.80881	7.42943	6.07612	7.37137	7.57731	4.64199	6.15225	5.82426	7.24817	6.65607	6.39629	5.8743	6.35984	5.48484	6.37068	6.88039	7.06334	5.0353	5.4638	6.2483	7.08636	5.5909	4.83519	5.59391	6.14836	5.90808	6.34776	5.60656	6.60276	6.8708	6.87595	4.51848	6.89891	4.04481	4.68451	3.75718	8.56736	5.34551	4.89866
ADCY8	8.89065	4.21424	5.75571	7.05759	3.90227	4.41456	3.66392	3.99372	3.52867	7.17629	5.88561	6.04087	5.25265	6.50569	7.87009	3.86336	4.49363	5.89214	7.36158	6.17685	6.05374	4.51026	4.09078	6.52989	4.314	7.65275	5.095	5.63925	4.14147	3.52174	4.28198	5.22957	4.83236	3.85497	5.72269	3.82523	5.63403	4.92882	6.65779	5.10542	6.19171	4.35393	5.54238	4.26623	4.58269	3.54897	3.86635	5.86	5.50252
ADCY9	7.71736	8.06132	8.85945	8.23633	8.38406	8.34282	6.69962	5.68214	7.13308	7.59731	7.37643	8.39357	7.7881	7.43777	7.65706	6.57396	7.41773	7.63118	8.19305	8.47124	8.22457	7.61158	8.77358	7.12968	7.28567	7.49805	7.30527	6.76428	8.89232	8.32223	7.74407	8.52323	8.20907	7.26112	7.76558	8.09354	8.16802	7.16131	8.0733	7.17249	7.62124	7.00887	7.42335	6.37028	7.72093	6.48513	6.9206	7.49666	7.80134
ADCYAP1	3.40443	4.00067	3.4597	3.46727	4.49427	3.47244	3.76287	3.38518	3.77752	4.01949	3.43488	3.69854	4.10582	3.57242	3.28455	3.87214	4.66077	3.78378	5.12063	4.13694	4.04812	3.80937	3.99155	3.82996	4.62916	3.58397	3.69413	3.72132	3.69178	3.41315	3.0857	3.75346	3.73982	3.08373	3.15873	3.2011	4.58533	3.76697	3.31845	4.27216	3.40238	3.31819	3.98759	3.43994	3.674	3.88853	3.53819	3.75952	4.91425
ADCYAP1R1	10.1391	7.98419	7.06546	9.93913	9.34774	7.79142	5.01542	6.09704	10.071	8.68168	7.45522	9.1035	8.79674	9.10948	9.88625	8.80819	6.81638	9.49268	9.17708	8.60514	7.56977	4.23387	7.52292	7.69352	8.23995	10.3351	7.05774	5.69713	7.05269	9.07814	8.26212	8.8774	5.5877	7.00688	8.65846	7.37635	8.05201	7.55067	8.84821	6.2782	9.35389	5.83315	7.59721	6.98737	5.9414	8.58663	4.63763	7.11603	9.60109
ADD1	5.5404	5.63191	6.44825	4.92088	5.50946	6.26106	6.23595	5.76125	6.87867	5.39763	6.02269	5.77547	5.13516	5.10711	5.28442	6.38818	6.01794	5.52192	5.47554	5.47901	6.65867	5.34532	5.52218	5.59917	5.35771	5.32347	6.18445	5.3455	6.33717	6.11841	6.28483	6.06779	7.16666	5.85113	6.64082	5.82386	5.98105	5.94083	6.16116	7.51061	6.61243	7.69431	6.17321	6.92119	6.04164	7.72822	6.21155	6.3697	6.53547
ADD2	5.91139	7.72405	5.58727	5.54219	6.89278	6.55525	4.81254	6.55792	6.82747	5.95391	7.19446	4.48436	6.25861	5.50802	5.79249	6.17559	4.47751	5.34355	5.01692	4.99909	5.404	5.74178	5.20653	4.42791	5.26897	5.1862	4.29768	6.95936	6.32237	7.32193	5.22885	6.54041	6.40157	5.66367	6.09274	6.05203	4.77963	5.31521	5.66414	4.91756	4.12802	7.02753	6.19931	6.44317	6.835	7.48236	3.8712	6.20762	4.21965
ADD3	11.8084	7.36755	10.5636	10.5497	10.4048	7.88553	9.31409	10.0356	10.4693	10.0247	9.00651	10.1431	9.61452	8.72189	11.096	8.76774	9.3939	9.77822	10.9393	9.7404	9.8372	8.62211	8.48503	9.34721	10.5255	8.51868	10.488	8.9839	8.55598	9.5253	9.60042	10.7881	8.9934	8.67803	8.72727	9.04742	10.1838	8.95014	10.8073	9.69744	11.7142	9.56794	9.44174	8.89292	8.30172	10.7361	8.40565	9.63537	10.5277
ADGB	3.0095	2.81937	2.7896	2.72851	2.72737	2.63775	2.7557	2.66271	2.65356	2.70922	2.66313	2.83658	2.78045	2.70057	2.67256	2.69999	2.55276	4.17162	2.7421	2.73651	2.7698	2.79739	2.67988	2.76647	3.88244	2.83385	2.75897	2.89549	3.05661	2.73652	2.83603	2.70558	2.83303	3.04511	2.84664	2.64529	2.84966	2.84178	2.80135	2.73243	3.09259	2.78029	2.78163	2.7016	2.65521	2.62748	2.78781	2.50823	2.74356
ADH1A	3.37422	3.16016	3.45417	3.31607	3.52183	3.10486	3.25028	3.17113	3.25701	3.13476	3.08011	3.12089	3.08633	3.33615	3.13985	3.45006	3.13945	3.03583	3.47254	3.26373	3.54344	3.16051	3.18357	3.10885	3.19507	3.33477	3.65409	2.82057	3.11636	2.88334	3.29416	3.08401	3.44278	3.12019	2.93173	2.7929	3.11077	2.8602	3.04428	2.84613	2.9018	2.82753	2.95808	2.86931	3.05067	3.12427	3.14676	3.03926	3.0993
ADH1B	2.77253	2.61792	2.81185	2.40066	2.68203	2.48115	2.5966	2.69565	2.54455	2.53247	2.71747	2.59882	2.50413	2.41101	3.44082	2.80362	2.59701	2.39358	2.58105	3.33881	2.55933	2.91654	2.50019	2.47054	2.60238	2.62042	2.60869	2.6339	2.59418	2.59088	2.48962	2.40451	2.55151	2.34128	2.68171	2.89199	3.16979	2.74726	2.45219	2.70313	2.79669	2.73593	2.48415	2.49508	2.52488	2.52876	2.80711	2.90355	2.67542
ADH1C	3.33129	3.17939	3.30353	3.00715	3.0529	3.05897	3.80107	3.16114	3.12595	3.04271	3.22583	3.02604	3.23795	3.12046	2.97845	3.41826	3.34279	3.02162	3.16392	3.55955	3.18315	3.2299	3.05545	3.20335	3.25622	3.09929	3.10565	2.88749	3.43304	2.98498	3.26675	3.24975	3.23915	3.09267	2.90707	3.20345	3.35912	2.97003	2.96572	3.04407	2.94676	2.83682	3	3.37436	3.24609	3.16409	3.19353	2.8386	2.95165
ADH4	7.39514	7.61654	8.50765	7.81388	7.16237	7.445	8.05113	7.49318	7.56268	7.26925	7.15389	7.23658	7.19216	7.15535	7.0598	7.26597	7.53749	7.55676	7.30139	7.22099	7.80317	7.24392	7.1305	7.27375	7.27029	7.18266	7.7599	8.27726	7.8521	7.23401	7.19434	7.15448	8.19338	7.05522	7.13643	7.36145	7.20219	7.32691	7.0258	7.5872	7.46323	7.98621	7.59879	7.51947	7.23667	7.60623	7.27609	8.13172	7.76938
ADH5	10.4899	9.36105	7.2239	9.82436	9.77055	9.51397	8.59266	9.79715	9.05545	9.68518	9.5502	9.10709	9.77594	10.0098	9.93782	9.71026	9.45087	9.55892	9.59618	9.0725	8.39688	10.312	9.01512	10.1616	9.56491	9.11763	8.44731	6.76964	7.13102	8.61107	8.70894	7.92444	8.10876	9.17482	8.62065	8.91622	8.85105	8.32192	9.22418	8.9986	9.24031	8.96291	8.75956	8.66463	9.24417	9.00735	7.95654	8.76529	9.26657
ADH6	3.68888	3.79919	4.11554	3.81096	3.76227	3.7762	3.96308	3.87305	3.71908	3.54102	3.70902	3.68385	3.84312	3.62978	3.65236	4.04101	3.73727	3.74322	3.67057	3.51702	3.75972	3.6315	3.89763	3.69773	3.93283	3.77811	3.90739	3.93003	4.19089	3.69687	4.01018	3.81457	3.4255	3.60815	3.43776	3.78265	3.88586	3.78698	3.67467	3.55825	3.60897	3.4504	3.85934	3.77041	3.93024	3.43874	3.90315	3.75457	3.90823
ADH7	3.52691	3.55982	3.66186	3.88531	3.56116	3.44604	3.77699	3.62229	3.90208	3.65451	3.63644	3.63728	3.57483	3.65035	3.58523	3.96813	3.4869	3.62817	3.56101	3.53	3.72113	3.83597	3.74526	3.49186	3.57926	3.84029	3.78519	3.6614	3.29709	3.17882	3.32969	3.54292	3.80459	3.38732	3.59018	3.51846	3.33356	3.28948	3.41075	3.32261	3.32442	3.54842	3.49254	3.41614	3.54524	3.77955	3.9189	3.75221	3.613
ADHFE1	6.97392	5.73144	7.29995	6.3491	6.76464	6.61295	6.3208	6.41863	7.57531	6.35822	6.71307	6.52017	5.83206	5.4969	7.46587	6.73411	5.93716	6.93571	7.38401	7.0683	6.70847	6.98607	6.49384	5.95009	7.19837	6.27976	6.32879	6.46253	7.04782	6.86608	6.60542	6.82536	7.18453	6.75643	7.26513	6.26359	7.46611	6.54432	7.85234	6.00385	7.96214	6.2224	6.06102	5.20558	6.31251	7.1717	5.72689	5.77248	7.97719
ADI1	9.18527	9.6094	9.27762	9.40414	9.22573	8.80217	9.14443	9.10363	8.20827	8.68986	9.19723	10.6865	9.5414	7.86439	8.88049	7.83299	10.0475	7.43533	9.74733	9.42273	8.66734	10.0396	9.12066	10.2215	9.2516	8.98696	9.2079	9.44266	7.60053	7.01846	9.75497	8.44916	8.21739	8.82484	8.57529	9.25221	9.01748	8.1013	8.29123	8.50469	9.30167	7.72625	8.02571	7.1041	8.9599	8.28009	7.99586	8.07464	9.13868
ADIG	5.24797	5.6717	5.46729	5.49316	5.91468	5.37349	6.20286	5.66595	6.0725	5.79032	5.66283	5.62631	5.41352	5.42113	5.89863	6.44154	5.90091	5.90087	5.53795	5.86689	5.81384	5.66998	5.6171	5.90066	6.1165	6.03086	5.23207	5.94565	6.16015	5.58535	5.54114	5.50051	5.86357	5.39792	5.46552	5.34465	5.76131	5.8345	5.4163	5.40015	5.57576	5.39385	5.52288	5.79347	5.60055	5.58895	5.43434	5.53419	5.55447
ADIPOQ	2.86515	2.74855	2.7813	2.51017	2.6679	2.67788	2.97556	2.78101	2.53538	2.66089	2.67971	2.59718	2.78861	2.94004	2.54561	2.9139	2.79654	3.05823	2.59591	2.66152	2.7782	2.64745	2.71457	2.79648	2.55168	2.82002	2.78823	2.67138	2.83776	2.7903	2.40542	2.59718	2.80715	2.48456	2.58546	2.43205	3.26083	2.6014	2.42939	2.65367	2.60063	2.62151	2.57541	2.6001	2.66018	2.75346	2.80711	2.67174	2.75172
ADIPOR1	8.29602	8.41936	7.96843	8.17365	8.27252	7.9253	7.66846	7.83946	7.00322	8.37961	8.95886	8.4348	8.39688	8.35924	8.27739	8.15702	8.12145	8.38351	8.69971	8.44591	7.2146	7.58686	8.31606	8.25006	8.43487	8.17373	7.71784	7.1363	7.66469	7.73792	7.85464	6.92876	7.21523	8.69444	8.25938	8.65479	8.19545	7.648	7.84499	8.04296	7.92627	7.30792	7.67259	8.07896	8.16027	7.61649	8.05518	7.75691	7.62973
ADIPOR2	9.05283	8.33296	7.83207	8.5658	8.99356	8.93264	9.65979	9.24482	9.03837	8.68123	8.78337	8.61759	8.60136	8.76233	8.87916	8.34729	8.84402	8.22998	8.49266	9.02439	8.23463	9.19521	8.78947	8.65132	8.9553	8.04107	9.52149	8.84084	6.97685	7.77058	8.30459	8.96056	8.5877	8.29886	8.12211	8.73028	8.36368	9.0814	8.33992	8.47892	9.84352	9.11788	8.10137	8.01343	8.07573	8.75824	8.17176	7.74272	8.618
ADK	6.52084	5.05448	4.81747	6.17843	6.03442	5.9467	4.02795	7.06801	4.51603	6.34997	6.78433	6.25632	5.98258	6.7493	6.51502	4.69554	4.32923	5.57719	6.38104	5.15378	4.61301	6.29467	5.4283	7.21699	6.45411	4.43499	4.3805	4.00121	4.05968	3.99388	3.43409	4.27226	4.22239	4.69881	4.09222	4.27843	3.72496	3.72811	4.85999	4.76119	4.73293	6.77582	4.16602	4.26478	4.89684	6.66406	5.4127	3.63515	4.7401
ADM	5.97187	8.60415	11.0045	10.4533	9.00813	6.10921	9.17762	7.01332	8.80094	9.09312	11.8277	7.47096	10.0038	9.48871	10.4888	11.4455	8.16517	11.7242	6.98281	11.5738	6.97798	8.41556	10.5091	8.80839	9.55576	11.753	9.25455	9.14309	9.96304	10.107	10.9575	9.47414	8.49189	6.1594	11.6302	8.02757	7.663	7.69306	8.92501	9.08934	6.86428	8.2748	9.88505	10.5018	8.43686	8.81456	10.8508	9.71482	6.46648
ADM2	5.46552	5.72864	5.70523	5.64424	5.65617	5.38439	6.11777	5.60492	5.65552	5.54795	5.54468	5.87727	5.5606	5.502	5.49315	6.42591	5.72674	5.47719	5.5416	5.74039	5.89911	5.67533	5.60718	6.0286	5.70247	5.73287	5.698	6.34918	6.2276	5.7417	6.11388	5.78657	5.85186	5.7813	5.29532	5.83246	5.83118	5.86394	5.44946	5.3545	5.77024	5.88805	5.73714	5.84124	5.91888	5.73194	5.81383	5.83233	5.73368
ADNP	9.80035	10.1889	8.05999	9.54366	9.93616	9.96039	8.45189	10.5114	9.46554	9.44371	9.80101	9.83357	9.71455	10.162	9.4862	10.0093	9.98099	9.85101	9.39799	9.02899	8.97681	9.88261	9.24872	9.89431	9.91109	9.31698	8.8362	7.92821	8.25284	10.2329	9.25038	9.93903	9.57651	9.75667	9.71901	9.74319	9.30757	9.55549	9.75657	9.7411	9.32456	10.1322	9.56561	10.5453	9.76123	10.183	8.698	9.55207	9.21236
ADNP2	7.88565	8.84004	8.25917	8.02775	8.4334	8.64007	8.24416	8.97647	7.74432	8.22069	8.87502	8.21717	8.34131	7.76505	8.21245	8.49984	7.94282	8.37967	8.60835	7.96487	7.72458	8.96632	8.08451	8.41224	8.10212	8.43484	8.02919	9.20275	8.26342	9.10255	8.70471	9.46778	8.68839	9.38963	9.06426	9.34259	8.74562	9.0246	8.49772	8.72172	8.50663	10.1595	8.97468	9.67884	8.46503	9.31992	9.06124	9.4727	8.68705
ADO	8.04073	9.46786	8.07828	8.56937	9.22251	8.80625	6.96961	8.40881	7.26835	8.59083	9.25855	8.37035	8.69808	8.31195	8.70259	8.85346	8.23766	7.91747	9.07653	8.21714	8.2704	8.59352	8.18871	8.99733	8.28978	8.27434	8.55669	8.53945	8.49075	7.85476	7.22241	7.63181	6.95803	8.88902	8.11963	8.75707	8.23939	8.11268	8.44656	7.6834	8.41785	7.6669	8.36938	7.16537	8.56437	7.94131	8.39745	8.10258	7.11525
ADORA1	6.47568	6.7297	9.07416	6.87816	6.86349	6.19568	6.16809	5.90513	6.53922	7.11863	7.25226	6.84045	7.06128	6.14153	6.99585	7.3304	7.305	5.33624	8.3846	7.56034	8.23286	4.51516	6.83292	7.78487	4.57202	6.88561	7.09449	9.47858	7.86601	7.12771	7.62499	6.60143	5.83699	8.12866	7.5929	8.00884	7.36901	7.37814	8.1784	7.42025	8.07477	5.44742	7.42664	5.83948	7.97253	6.11089	4.56552	7.38184	6.36712
ADORA2B	3.99966	7.18178	7.50212	7.19941	7.58798	5.65823	6.24954	3.79634	6.39168	7.98972	9.00916	5.92837	7.262	6.65394	5.71828	7.72569	5.1897	7.78402	4.13614	6.77279	5.93086	9.00821	7.94207	8.12082	8.80221	6.97445	7.22194	4.8899	5.19068	6.55885	7.65895	6.75156	5.11265	5.8474	8.07236	6.56187	6.99253	5.80425	6.95918	5.15987	4.42657	4.60542	7.7828	5.61685	6.33718	8.36796	8.01932	5.39998	6.88747
ADORA3	9.27743	7.09066	7.31835	7.76607	7.13557	8.22974	9.00864	3.78783	5.20598	9.26442	6.50537	9.89586	8.19584	7.18261	9.00477	7.05246	7.12818	6.89775	5.84966	8.58875	5.70486	4.80005	6.5705	5.70131	7.07126	7.82445	9.09254	6.47606	5.60601	6.45672	8.40095	8.08623	5.42649	6.13823	6.97171	6.59202	6.32335	8.17398	6.42622	6.67705	7.98049	6.13517	8.10521	5.43969	5.02771	3.5337	4.74686	5.57762	6.50344
ADPGK	5.8674	5.44859	5.14087	5.81322	5.19864	6.16886	5.6535	5.51905	5.27555	5.74017	5.84598	6.59183	5.62714	6.23043	5.41754	5.85519	6.03478	5.79736	5.44018	5.46739	5.44218	5.97223	6.19488	6.20817	5.75712	6.51233	5.46995	4.3043	4.94279	4.4773	5.44828	5.24938	5.27466	5.496	5.26938	5.28078	4.6937	4.72133	5.40319	6.61782	5.20166	5.53361	5.32125	5.57048	5.94145	6.0166	6.40508	4.77235	4.95147
ADPRH	5.20939	4.24671	4.96544	5.21771	4.77114	4.59801	5.54221	3.843	4.91514	4.86971	4.33923	6.69935	4.72202	5.01351	5.16088	3.82514	4.73876	4.51637	5.17035	5.84642	5.33271	3.49695	5.23075	5.07938	5.35742	5.10542	5.62008	5.24842	4.77889	4.41278	4.73473	4.59917	3.7098	4.26143	4.70677	4.2631	4.28649	3.98889	4.56286	4.23851	4.39039	3.38905	4.62197	3.71561	3.98722	3.23868	4.62209	3.84548	3.83415
ADPRHL1	5.30354	5.02835	5.43627	5.47984	5.32926	5.28315	5.37164	5.82904	5.5246	5.22194	5.15646	5.40836	5.34721	5.81666	5.36081	5.41061	5.31862	5.74326	5.20588	5.18366	5.26076	5.27232	5.11681	5.73308	5.44722	5.37385	5.30551	6.06703	5.00362	5.04033	5.2035	5.32531	5.31868	5.47663	5.55561	5.63036	5.61824	5.09409	5.20895	5.22457	5.38788	5.69962	5.17147	5.39668	5.34981	5.24104	5.73242	5.35649	5.90425
ADPRHL2	8.24885	8.47736	8.47557	8.40543	8.3098	8.56224	9.02263	8.46904	8.35612	8.47379	8.7739	8.88528	8.76762	8.95262	7.53919	8.83246	8.02201	8.68568	8.31802	8.60765	8.64942	8.18089	8.42209	8.38459	8.54729	7.85117	8.04458	9.52567	8.03671	8.49867	8.81602	7.8396	8.52257	8.79043	8.28895	7.92573	7.51792	8.03462	8.04448	8.0889	8.23388	7.94074	7.884	8.71351	8.39999	8.15745	9.0389	7.97384	7.47452
ADRA1A	6.9644	3.12128	3.23679	2.97593	3.50395	4.55816	3.32209	3.77416	3.04146	3.19404	2.92726	3.01641	2.89822	2.90142	4.65478	3.09128	2.94956	2.98141	3.91856	3.12	3.12383	3.31268	3.00191	2.95449	2.89779	2.93203	3.03809	3.44546	3.83644	3.3904	3.45999	3.47448	3.36639	4.06382	3.38728	3.35399	3.3762	3.38771	3.22288	6.00503	4.74955	6.16819	3.16759	3.29187	3.07571	4.2409	3.14976	3.32173	4.17775
ADRA1B	3.35342	3.33121	3.36197	3.27914	3.48919	3.4941	3.40581	3.22491	3.33293	3.44321	3.19747	3.1059	3.40003	3.35695	3.21071	3.33238	3.50648	3.43541	3.0637	3.20103	3.29093	3.3561	3.35897	3.39223	3.46497	3.55012	3.38132	3.8633	3.93036	3.27106	3.68125	4.03426	3.77373	3.64188	3.48601	3.69184	4.04093	3.4641	3.64837	3.50644	3.43349	4.76012	3.33121	3.74701	3.59926	3.17882	5.48658	3.46864	3.74785
ADRA1D	3.2998	3.19533	3.62743	3.17216	3.34475	3.18008	3.41334	3.01616	3.18256	3.45124	3.26612	3.1478	3.23983	3.24111	3.31056	3.43229	3.5018	3.23407	3.27412	3.37724	3.46662	3.39442	3.39071	3.37095	3.55142	3.45502	3.60536	3.4716	3.83508	3.0604	3.11185	4.21325	3.10671	3.30908	3.22769	3.27257	3.80142	3.32004	3.11629	3.04139	3.32663	3.1478	3.2152	3.40355	3.59039	3.16428	3.4169	3.25016	3.77231
ADRA2A	8.85813	3.24125	4.03098	4.51138	5.35916	3.49863	3.42918	6.68697	3.36833	5.87418	3.22848	3.28484	3.2627	2.9995	4.45006	3.89069	3.70813	4.08522	3.12024	2.88266	3.62451	2.77299	3.31942	3.43862	3.61102	6.45835	3.6727	3.24139	3.30073	4.03494	3.77175	2.69072	3.03636	4.43403	3.27214	3.67041	5.4	3.33543	4.5947	3.01942	4.07752	3.69382	3.41546	2.96654	2.82182	3.16157	3.41623	3.64841	5.77067
ADRA2B	4.9578	5.40269	5.84934	5.16672	5.51537	5.36135	5.39754	5.07333	5.40557	5.36244	5.41088	5.33372	5.37986	5.31214	5.25055	5.49874	5.15797	5.55816	5.16867	4.92408	5.44832	5.20537	5.5755	5.54278	5.16873	5.41565	5.73086	6.0996	5.8337	4.82253	5.38511	5.62482	5.45917	5.04543	5.57855	5.27892	5.62418	6.00363	5.27243	5.03752	5.25735	5.40857	5.04595	5.3092	5.25224	5.2486	5.66362	5.47265	5.9572
ADRA2C	5.22766	5.37681	5.85262	5.18874	5.29823	5.3647	5.38623	5.32552	5.08386	5.3408	5.28129	5.62395	4.98458	5.56842	5.41768	5.47918	5.51361	5.97677	5.15399	5.65087	5.28435	5.66207	5.75153	5.42511	5.24018	5.21148	5.34811	5.46619	5.84214	4.95486	5.36353	5.71709	5.50484	5.57985	5.15352	5.40678	5.58754	6.18493	5.31151	5.1774	5.79756	4.95412	5.29614	5.50741	4.98198	4.76178	5.49347	5.41915	6.12497
ADRB1	6.4196	6.93897	8.35089	7.8708	8.3345	4.79891	5.07593	3.15042	7.77718	5.03314	3.09832	7.01525	8.26614	5.42761	5.39122	7.87555	6.60477	3.55255	7.2041	4.38871	7.4478	2.84757	5.81998	3.08519	4.11045	2.89094	5.64715	8.12912	8.39099	8.18553	4.22824	8.67814	6.6994	5.89355	5.50472	5.89093	8.16111	6.21849	7.00842	5.07087	6.79426	9.0447	6.83623	3.63551	7.39787	8.42835	2.87854	6.97965	8.666
ADRB2	6.43055	4.26047	4.26223	5.68079	4.50712	4.62082	4.84248	3.971	4.17689	5.47185	3.81962	6.47729	3.56986	4.24605	6.25849	4.27852	5.06704	8.85868	7.03186	5.71129	5.22632	3.78803	5.23476	4.07729	5.99301	4.55523	6.11321	3.44431	3.76326	4.73747	5.12431	4.71962	4.24308	4.37505	4.34979	4.46059	5.61523	5.13559	4.26037	5.42069	6.52542	3.87917	5.15848	3.19272	3.27743	2.71496	3.94371	4.09425	5.17554
ADRB3	4.2483	4.45616	4.44191	4.24802	4.38433	4.15046	4.48681	4.36104	4.61043	4.51243	4.4131	4.44008	4.18176	4.27194	4.37389	4.87285	4.27868	3.97415	4.1189	4.35099	4.25549	4.55533	4.35428	4.32896	4.15808	4.55778	4.55467	4.66475	4.99676	4.45289	4.57521	5.00493	4.41981	4.57022	4.33961	4.45062	4.71791	4.82793	4.62944	4.20916	4.32246	4.67514	4.56565	4.42123	4.67814	4.4368	4.48573	4.41154	4.55997
ADRBK1	5.15388	5.24283	5.21688	5.23536	4.92328	5.26175	5.70579	5.3262	5.23565	4.82481	5.1317	5.14659	5.10969	5.4282	4.98845	5.76309	5.15925	4.98715	5.39631	5.35907	5.43071	5.28248	5.27839	5.49982	5.15167	5.49045	5.27912	6.00593	6.05216	5.12216	5.76304	5.85896	6.40005	5.6609	6.11434	5.71164	5.95837	5.85529	5.98634	5.90335	6.01487	6.00624	5.8392	6.40569	6.18356	5.61078	6.20784	5.3507	5.95339
ADRBK2	7.05322	6.87808	5.26315	6.47237	7.00237	7.60065	5.70532	6.98251	7.58039	6.25642	6.31163	6.46723	6.602	6.92445	7.72552	3.57509	6.41712	6.73802	7.18685	6.72189	6.72999	8.32693	5.64044	5.88853	6.85983	4.7629	6.02561	7.05692	4.56398	6.47907	6.85419	6.96193	5.87254	6.85316	4.40075	6.41703	8.57834	6.48502	7.6894	7.12778	6.78178	6.95233	7.06615	7.85258	4.97965	5.86863	3.55374	6.03627	9.16294
ADRM1	7.54209	8.20807	7.76748	7.59311	7.55077	8.04405	8.64608	7.44048	7.61348	8.02982	8.10467	7.65968	7.75029	8.23641	7.3222	8.30612	7.99091	7.24573	7.16711	7.65857	7.52999	7.30179	7.74765	7.79633	8.18504	8.36403	8.03508	8.71715	8.26397	7.93232	8.28925	8.15091	8.36598	8.31789	8.40359	8.90895	8.26019	8.60583	7.98401	7.88476	7.95701	8.03975	8.37834	8.59894	8.71147	8.06103	9.15261	8.4964	7.43801
ADSL	8.45608	8.72099	7.36285	8.65756	8.67115	8.8716	8.26905	8.58384	8.44361	8.99523	9.23585	8.7002	8.40017	9.66219	7.91562	8.99794	8.20297	8.94625	7.89371	7.91143	8.07199	9.86516	8.50508	9.69231	8.48567	8.70529	8.11628	7.63738	6.88745	8.71036	8.38616	8.34855	7.64122	9.50784	8.71361	9.59687	8.47213	8.85831	8.31115	8.7616	7.74744	8.68793	8.82649	8.69618	9.28552	8.51267	9.49666	8.2646	7.62691
ADSS	7.78509	9.54595	8.22075	8.42347	8.39978	7.56404	8.09308	8.63881	7.13321	8.11003	9.31342	8.85854	8.60775	9.03822	8.52142	9.05926	8.24106	9.12422	8.5157	8.17015	7.61594	8.39839	8.64764	9.23775	9.2796	8.88168	8.23426	6.63535	6.7681	8.17953	7.43351	5.9862	6.85757	9.08202	8.19381	8.55967	7.87924	7.12699	7.18952	8.07067	7.46201	7.65471	7.11033	9.12153	7.64052	7.4245	8.15331	7.79312	7.72387
ADSSL1	4.63531	4.33902	7.33288	5.70942	5.25508	4.54066	8.19717	3.86575	5.0904	6.89284	5.96859	5.68857	5.68512	5.43225	6.59684	5.35068	5.07927	6.53287	6.14072	7.16039	5.51667	4.89034	5.94759	6.28081	6.83036	6.29968	5.6017	5.44411	6.60921	5.31484	5.58646	5.66765	5.05704	5.23055	4.65306	4.79569	5.68909	6.15247	7.59357	5.33852	6.19594	4.27238	6.13445	4.3221	6.22845	3.81892	3.40081	5.07222	4.56869
ADTRP	3.38955	4.25548	3.91085	4.27899	3.35344	3.83305	3.97617	3.39366	3.57058	3.67076	3.41648	3.45153	3.77585	3.6027	3.79212	3.5061	3.70835	4.32007	3.45353	3.5742	3.38887	3.50942	3.53993	4.09066	3.56078	7.93979	4.01001	3.46234	3.53485	3.34349	4.37129	2.96367	3.07462	3.23608	3.40561	3.80654	3.65819	3.64785	3.1435	4.09567	3.08844	3.5775	3.6027	2.92121	3.13437	3.28874	7.32574	3.22488	3.82832
AEBP1	10.7292	8.15416	9.63331	10.0599	8.55789	6.16516	7.82857	8.2605	8.74241	9.33123	8.44615	10.0013	7.58275	9.83577	9.75388	10.5197	9.00492	8.4905	9.8197	10.6356	9.81248	6.62248	8.93277	8.42178	9.86362	8.36115	9.29069	9.41408	8.94821	8.06636	10.117	9.44268	9.30921	7.9372	9.38609	8.80678	7.92252	8.84757	10.5623	9.43974	9.04589	6.39104	9.05117	7.41701	8.2515	8.98638	8.38688	8.65542	6.61135
AEBP2	9.221	7.88063	8.97014	9.15104	8.60424	8.62619	9.32232	9.48224	8.48705	9.11183	8.95705	8.80742	8.70954	9.11457	8.76426	8.31851	9.18326	9.74589	8.87911	8.87126	7.86002	9.93334	9.25606	9.542	9.03269	8.85271	8.24045	7.68506	7.91978	7.09888	7.607	7.38542	8.23007	7.49158	7.84784	7.44611	7.3581	7.38129	7.70689	7.25751	7.8571	8.13555	7.49801	7.34751	7.78464	8.83696	7.98013	7.25954	7.96256
AEN	6.44393	7.51426	6.88742	6.54802	6.42846	7.05652	6.62027	5.85398	6.64139	6.27778	7.53457	6.43771	6.62692	7.70617	7.40492	7.01162	6.97425	6.95477	7.34776	7.46723	7.47329	7.89267	6.95762	7.13631	7.03662	7.98333	6.76977	7.06843	7.25585	6.89328	6.97603	5.9653	7.01464	7.0907	6.7561	7.08848	6.22183	6.97249	6.70881	7.4375	6.6864	6.62887	6.76098	6.5719	7.46745	6.548	8.21174	7.49282	6.43953
AES	6.38246	8.28776	8.23285	7.36797	7.96128	8.11063	7.63523	7.63658	7.70969	7.43095	7.5211	7.24455	7.41495	7.36142	7.48779	8.03476	7.88492	6.87269	7.79616	7.78276	7.96601	7.00003	7.36663	7.42543	6.77281	7.58652	7.48684	9.24651	9.43182	8.61815	9.22674	9.02721	9.72676	9.52145	9.46367	9.26648	9.78341	9.45396	8.83846	9.55088	8.77807	9.3498	9.12443	9.57248	9.5372	8.20623	8.65685	9.77592	9.32803
AFAP1	4.98429	4.96812	6.19499	4.75561	5.03169	5.48253	4.49633	4.75051	4.94782	5.18603	5.05575	4.58588	4.74854	4.70491	4.58986	4.8357	4.93337	4.42494	5.67943	5.65581	6.19737	6.0096	4.86441	4.95976	4.73036	5.86776	4.78464	4.22334	4.97921	4.80457	4.97292	4.42174	5.2448	4.79041	4.86225	4.67287	4.33114	3.98696	4.85468	5.20917	4.81326	6.13005	5.5064	3.85481	4.89986	4.99761	4.44223	4.11513	4.15769
AFAP1-AS1	3.42491	3.67718	3.88895	3.89221	3.26551	3.78648	4.13497	3.47882	3.78878	3.67229	3.87789	3.61095	3.60377	3.5953	3.56432	4.21965	3.77267	3.62263	3.34786	3.5983	3.47476	3.7367	3.60942	3.86566	3.60003	3.52862	4.06594	3.92512	4.52926	3.41537	3.63838	4.20092	3.68703	3.64722	3.7422	3.76355	3.86276	4.05593	3.56462	3.6864	3.52634	4.01146	3.80999	3.61847	4.33848	3.49886	3.88933	3.52782	3.87866
AFAP1L1	3.97719	5.81797	5.99095	6.02976	7.05491	5.2088	4.98715	4.61322	6.15731	6.01981	5.56988	4.78872	6.28049	5.19609	6.69	5.99173	6.43651	5.05234	5.35745	6.61758	6.10974	5.0158	6.34934	4.88761	6.29368	5.14298	6.83152	4.31613	5.02283	4.96755	5.46757	4.09451	4.8239	4.14352	5.78504	6.44892	5.56964	5.03296	6.11573	5.60639	4.82167	4.83763	7.12593	3.69043	5.59123	5.53944	4.93032	5.43231	4.01037
AFAP1L2	4.59427	5.37926	5.33078	6.59463	7.84009	5.19853	4.83748	4.14004	5.02551	5.38073	7.57671	5.60457	6.49599	4.25605	6.58057	4.80827	5.32855	4.26741	8.67972	6.99945	7.47211	4.19126	7.26754	4.92684	9.01568	3.91447	5.94751	4.78535	4.44116	7.01252	4.56461	4.80504	5.79766	7.07395	6.47471	6.75068	6.12958	4.91428	7.1292	4.15273	7.68757	5.49946	6.10183	3.64676	6.13938	4.87508	3.98423	5.3203	5.06435
AFF1	9.73909	9.11627	9.47199	9.04917	8.8547	8.31172	9.80659	8.8028	9.09181	9.15188	9.41345	8.75684	8.71607	8.15955	9.31142	8.18795	9.6411	9.30254	8.88502	9.65362	9.32988	8.07259	8.82284	8.60974	9.22589	9.19378	9.30077	8.45869	9.25987	8.34472	9.9549	8.92413	9.00392	7.97721	8.93603	8.75024	8.45091	8.71446	8.97716	8.75109	9.08532	7.56887	9.00223	8.51131	7.84952	7.95022	8.96594	8.81186	9.00606
AFF2	6.86326	6.218	5.82296	5.94099	6.30745	6.40932	5.22696	8.70715	5.23561	5.94129	6.70783	5.15721	4.67165	5.15788	5.72523	5.39445	5.12115	4.75926	4.83228	4.76972	5.46257	7.82851	5.63806	4.71715	5.24277	4.8438	5.04405	5.20811	4.94926	6.55371	5.34135	6.77848	4.96461	5.91954	6.18369	5.26629	5.96324	5.54915	5.92562	5.57804	5.27664	5.91699	5.2936	4.69196	5.18824	5.06019	5.53371	6.09216	5.62099
AFF3	7.43476	8.39349	5.27066	7.32012	8.88807	7.0497	4.0367	9.85784	8.52551	8.16814	5.09225	8.9051	8.2946	9.85825	8.06072	7.36035	6.02784	9.27775	6.38411	6.68723	6.08328	7.86481	9.12589	7.8147	7.85533	7.50058	5.6241	9.2597	4.2596	8.71028	5.5857	8.08113	3.68117	6.32782	6.37443	6.84707	8.48688	6.75632	6.86268	6.69662	6.85719	8.87854	7.67941	8.87237	4.59342	7.5451	4.37204	8.49942	9.39952
AFF4	4.53066	5.34048	6.6913	4.96393	5.00919	6.45877	7.26671	4.87967	5.96338	5.67672	4.99319	4.654	4.72971	4.38672	5.74893	5.29117	6.32851	5.70762	5.53168	5.41816	5.80647	5.12757	5.2594	4.88075	5.1272	5.63014	6.14189	5.10612	5.63774	5.61249	5.9593	5.29881	6.40875	5.46616	5.78569	5.23507	5.80806	5.63374	5.94645	6.86371	5.78676	7.0816	5.18847	5.51576	5.69496	6.38088	6.10267	6.03269	5.94386
AFG3L1P	5.94099	5.52827	6.06108	5.35382	5.50129	5.40179	5.9445	5.46391	6.11536	5.32382	6.32437	5.581	5.86598	6.26221	5.32721	6.26507	5.52045	5.28613	5.7216	5.53413	5.97508	5.80916	6.01066	5.75556	5.70304	5.57506	5.97944	7.23682	7.3631	6.71576	7.08149	6.14036	7.6958	6.70379	8.14201	7.09687	6.79179	6.7563	6.95916	7.35473	6.91289	7.57051	6.86956	7.76236	7.17204	7.70474	6.94665	7.32796	6.04223
AFG3L2	7.24629	7.7723	6.74991	7.23015	6.96104	7.73423	8.38888	7.33561	7.26605	7.68074	8.08228	7.35804	7.09992	7.66751	7.08829	7.68825	7.23986	7.61157	7.02385	7.16749	7.31764	8.06182	7.16731	7.95608	7.60881	7.27225	7.28925	8.47771	6.1521	6.61444	6.93192	7.07542	6.78346	7.14973	6.93887	7.41068	7.36058	7.40624	6.89553	6.76292	6.72176	7.20444	6.85045	7.01939	7.62888	6.99251	7.16536	6.53231	7.1004
AFM	2.62149	3.1395	2.46404	2.79523	2.69817	2.59506	2.65024	2.86794	2.57838	2.70571	2.90793	2.83798	2.88528	2.845	2.52127	3.26023	2.75095	2.54479	2.70986	2.63884	2.72374	2.75981	2.70548	3.11738	2.82846	2.82501	3.06464	2.89739	2.69123	2.8026	2.88902	2.57042	3.00879	2.6359	2.56521	2.65901	2.73366	2.59606	2.75632	3.02229	2.85909	2.99923	2.66789	2.55108	2.66798	2.58287	2.84162	2.95246	2.71384
AFMID	4.10523	4.4743	4.72139	4.74973	4.25478	4.48791	5.431	4.60913	4.584	4.25725	4.34941	4.75748	4.40175	4.68186	4.34534	5.43725	4.81597	4.4481	4.5386	4.20854	4.50624	4.64547	5.1503	4.40565	4.40955	4.4694	5.27494	5.06796	4.60623	4.35043	4.27538	5.07171	4.91979	5.06945	4.31045	4.79811	4.56613	4.84503	4.3903	4.25725	4.91811	4.48068	4.27844	4.56857	4.47006	4.16088	4.65284	5.16543	4.34035
AFP	5.42157	3.7101	4.16612	4.50846	3.71295	3.6154	4.99991	3.7963	3.79742	4.09028	4.16449	3.8127	4.14476	3.85421	3.50673	4.40289	4.83787	3.62572	3.94103	3.79555	4.3024	3.72199	3.84556	4.10376	4.16754	4.39197	3.9705	4.19609	3.63541	4.07918	4.23625	3.71789	4.11848	3.83644	4.16454	3.956	3.56338	3.78552	3.86035	3.41532	3.57768	3.70171	3.87877	3.74857	3.77124	3.654	4.62373	3.89999	3.65615
AFTPH	8.52442	7.6481	7.77673	8.16903	7.65726	7.53926	7.21549	7.95902	7.40742	7.5713	8.03812	7.87944	8.02513	8.36077	7.70262	6.43026	7.9985	8.18353	7.82094	7.71898	7.62558	7.69336	7.2132	7.7754	7.78006	7.5993	7.0627	7.05614	7.38839	7.37042	7.75817	6.80047	7.02062	7.22672	6.8355	7.04669	6.89555	6.60086	6.93343	6.68144	6.99718	7.57754	7.01117	7.68595	6.86321	7.17638	7.42866	6.80395	7.44242
AGA	8.8135	4.22913	5.9557	8.07184	7.64309	7.29354	5.54926	6.85974	6.71957	7.81103	7.33541	7.54872	7.44807	8.79119	8.14967	5.54312	6.62357	8.36274	7.69369	7.25687	5.89785	7.65002	7.26515	8.06894	7.42697	7.41844	7.07412	6.93644	4.90238	7.04169	5.77606	5.46079	7.20639	6.61206	7.46345	6.9624	6.90155	6.13106	7.33759	6.50286	7.68449	5.24477	6.08189	5.40124	5.68582	6.34525	8.22033	6.54758	6.3801
AGAP1	7.98691	8.86688	8.19091	7.73715	9.44187	7.60862	5.80732	7.10867	6.82916	7.42507	7.64444	7.60172	8.21694	7.91156	6.81456	8.03294	8.2319	7.08085	8.60194	8.24956	8.6484	7.20561	8.35999	7.94813	6.71909	7.85126	7.60775	6.32066	9.62628	10.3322	8.77569	7.53653	7.13732	8.94332	9.16699	8.91837	9.01684	8.5988	9.06169	8.00767	9.20201	7.67489	8.82343	9.38824	9.25973	7.40108	3.64717	9.248	8.26468
AGAP11	5.10197	5.34855	5.73575	5.09184	5.34164	5.13512	5.52599	4.94721	5.11203	5.05939	5.05147	5.02157	5.22594	5.4038	5.04654	5.26917	5.22027	4.97922	5.58874	4.99847	5.51493	4.98349	5.00377	5.20895	5.32375	5.14309	5.19372	5.7428	6.08836	4.49225	5.23138	4.9879	5.99422	5.43773	5.09279	5.33295	5.23446	5.05682	5.18086	5.40509	5.63615	5.73453	5.3888	5.44429	5.5169	5.32225	5.43319	5.38125	5.36328
AGAP2	4.77164	6.04664	5.34825	5.44594	4.88776	4.31771	4.84751	4.35234	5.11513	4.76883	5.02311	4.43152	4.57339	4.41619	4.8151	4.59306	5.65772	4.09979	4.56441	4.99416	5.62004	4.66481	5.26394	4.87095	4.46899	4.55438	5.0256	4.49217	6.78243	5.63631	4.3948	4.90497	4.90134	5.74196	5.93263	5.79271	6.50721	5.42004	5.47855	4.72348	5.34079	4.64398	5.26311	4.7344	4.45922	4.26336	4.44851	5.69273	6.26215
AGAP3	3.57163	4.51699	3.89128	3.50663	4.02856	3.37506	3.59435	3.5637	4.09926	3.54241	3.78672	3.91588	3.7861	4.35548	3.73499	4.34106	4.2507	3.43541	3.54558	3.80032	3.82418	3.69889	3.61667	3.93592	4.05581	3.86929	3.90031	3.9458	4.53919	4.96696	4.78452	4.97473	4.74956	5.70128	5.18314	5.85872	7.10087	5.17768	5.90227	4.76375	5.8648	4.85312	4.72614	5.37534	5.82913	4.77258	5.1378	5.28113	6.50991
AGAP4	4.8543	6.77941	7.28791	6.4121	5.30501	6.75499	5.81803	6.01975	6.21614	6.74102	6.57881	6.22252	5.0281	4.80233	6.7811	6.27212	6.25863	6.394	5.70304	6.03088	7.01578	6.29603	5.62616	5.84038	6.31111	5.89241	6.51166	8.69395	7.51632	6.97263	7.60636	8.13263	8.64699	8.54148	7.97565	8.07324	7.98427	7.67948	7.76947	8.57424	7.95264	8.83069	8.15087	7.64251	7.59896	7.9306	7.58774	8.84793	7.18045
AGBL1	3.50802	3.5825	3.93837	4.35688	3.5723	3.8459	4.06801	3.58829	3.58011	3.61139	3.45093	3.745	3.5068	3.89084	3.77301	3.81292	3.49192	4.0699	3.75848	3.55135	3.69801	3.64228	3.6134	3.65351	3.55972	3.35478	3.821	3.45093	3.64544	3.43755	3.69885	3.5592	3.8373	3.36062	3.82603	3.58513	3.68588	3.58743	3.56198	3.76682	3.4082	3.97667	3.3491	3.61317	3.54143	4.93059	3.44763	3.35542	4.14818
AGBL2	4.13572	3.68494	3.82596	3.73703	3.60831	3.58658	3.31637	3.83936	4.42016	3.86521	3.78898	3.86695	3.87826	4.49325	3.55513	3.85019	4.12915	6.58038	3.8473	3.59355	3.60993	5.19836	4.6479	4.01743	6.2981	4.15686	3.94496	4.9242	3.65206	3.66352	4.72616	3.71377	4.32232	3.93897	3.63629	3.34926	3.55214	3.66977	3.54867	3.45578	4.45911	4.22627	3.59104	4.67672	3.49472	4.3282	3.84148	3.63471	3.69507
AGBL3	3.76788	3.92825	3.2286	3.56258	3.64624	4.07521	3.31761	4.71335	4.25078	3.79481	3.8493	4.17626	4.71508	4.50361	4.25951	3.28328	3.66993	3.70827	3.28075	3.08456	3.14953	4.67826	3.80149	3.77646	4.09853	4.182	2.74144	4.52228	2.94359	3.85005	2.48053	3.28256	3.87409	3.29521	3.62741	3.31402	2.87603	3.24709	2.99862	3.56496	2.91175	3.90902	2.90443	5.20843	2.24649	4.31657	2.932	4.00644	2.80724
AGBL4	5.09865	4.74221	4.65891	4.3588	4.75816	4.52092	4.99683	4.79126	4.7713	5.09912	4.656	4.33875	4.7108	4.70941	4.9262	4.66843	4.98715	5.52718	4.70492	4.36481	5.47582	5.01437	4.6852	4.41728	4.66234	4.8252	5.36957	5.07526	5.00679	4.79139	4.98415	4.63821	4.4755	4.77147	4.15013	4.54361	4.92132	4.14429	4.51092	4.57336	4.55373	4.35033	4.18075	5.08209	4.69318	4.24866	4.18333	4.7461	5.15327
AGBL5	5.75551	7.4984	5.9466	5.89557	6.21963	6.72143	6.6539	5.29945	5.95084	6.4489	6.17359	5.86083	5.97481	5.75174	5.59207	6.25942	6.29428	6.18335	5.98811	5.83147	5.57229	6.06292	5.77438	6.61791	6.51194	6.05575	5.96567	6.82314	6.25305	6.53393	6.59698	6.03228	6.42852	6.58641	6.51738	7.32057	6.41483	6.97449	6.50223	6.16125	6.23789	6.89408	6.63627	7.16381	7.24633	6.28125	7.01819	7.14952	5.92147
AGER	4.83538	5.19651	5.80559	5.04744	4.8008	5.0295	5.82352	5.28744	4.93342	5.2604	4.89277	4.91364	5.07341	4.8495	5.14637	5.35508	5.05821	5.0423	4.99191	4.97263	5.20215	5.14878	5.17713	4.9989	4.94698	5.34885	5.77081	5.5035	5.73049	4.76594	5.29518	4.73628	5.79752	4.55934	4.76436	4.66759	4.67251	5.49378	4.67732	4.51188	4.85738	5.0378	4.65166	4.58196	4.51129	4.87503	4.992	5.13502	5.20754
AGFG1	7.97579	7.28027	5.8646	8.16384	7.91354	7.81636	8.23434	7.70042	7.38635	8.20928	8.40353	8.08361	8.00004	8.21267	8.0437	8.63851	7.46596	7.9265	8.16496	8.30326	7.51417	7.11646	8.65086	7.79704	7.84591	8.27655	7.29534	7.53637	4.38816	8.04721	7.52719	6.96038	6.34794	7.38563	7.44567	7.74084	6.96961	7.04827	7.67477	7.00052	7.61516	8.11036	7.79247	7.51098	7.84876	7.93386	8.20858	7.3758	6.76798
AGFG2	6.74203	5.46906	6.37283	6.31713	6.17845	5.90664	6.8792	5.32531	6.20594	7.42232	7.13351	6.62643	6.25649	5.33967	7.13335	5.71612	6.3288	5.83884	7.51067	7.94674	6.05874	6.171	6.10657	6.16649	5.86722	6.81251	6.31923	6.43563	6.20323	5.54432	6.42559	6.97051	6.08687	5.26977	6.64783	5.51418	6.02433	6.13075	6.59276	5.88714	7.33364	5.23727	5.70581	5.45742	6.00091	5.76723	6.13429	5.38495	6.0226
AGGF1	9.05453	8.07545	7.45183	8.90958	8.58583	8.12538	8.39504	8.91452	8.14332	9.12986	8.65401	8.35814	8.86972	8.789	9.10422	7.60904	8.49618	8.92881	9.03116	8.74263	7.89181	9.38338	7.99445	9.05777	9.48295	9.07397	7.94281	7.55212	6.92923	8.74461	8.82596	8.69035	7.34092	8.81022	8.66044	8.53132	8.12009	7.90097	8.63652	8.29141	8.37061	8.09594	7.76908	7.72362	8.49657	8.49468	7.77339	7.61298	8.54789
AGK	6.84782	7.72219	7.05091	6.14548	6.36547	6.88456	6.16972	6.79904	6.75721	6.84625	6.88608	7.11965	7.26675	7.64967	6.72462	6.46407	7.27844	6.36907	6.96353	6.8163	6.49039	6.87943	6.3167	6.86642	6.21145	7.46638	6.11353	7.15732	6.77203	6.3633	6.18213	6.26994	6.23796	6.45132	6.13835	6.11867	6.42615	6.13637	6.23923	6.26881	5.41211	6.26862	5.36092	6.40508	5.8196	6.25114	6.9178	6.49051	6.76545
AGL	9.68028	9.24946	7.1414	8.92561	8.30701	9.16118	9.13463	9.30567	8.2012	8.77953	8.88156	8.81776	8.96505	9.32827	9.97525	7.58901	7.93064	8.68632	9.03073	8.20764	8.36303	9.07723	7.8074	9.03217	8.63647	6.72036	8.17376	9.17003	7.55612	8.51821	8.45164	8.21805	8.8055	8.51945	8.44027	7.02698	8.02268	6.734	8.06357	8.06189	8.52825	9.90028	8.04371	9.26998	7.78854	8.60817	7.71072	6.91207	8.58956
AGMAT	4.19725	4.10531	4.03401	4.29586	4.26892	4.12623	4.52549	4.22955	4.26785	3.72627	3.93441	4.84755	4.20592	4.70258	4.00332	4.61487	4.21448	3.90845	3.97505	4.01192	4.13089	4.02934	4.40188	4.60696	4.23236	4.22536	4.20379	4.25355	4.95522	3.94577	4.49722	4.51796	3.96292	4.70141	3.89247	3.90022	4.69217	4.45421	3.78177	4.1736	3.93706	4.04473	4.25829	4.71387	4.34378	3.96002	5.4255	3.9776	4.68709
AGPAT1	7.80482	8.95274	8.75912	7.5288	7.76576	8.32446	6.68781	7.32379	7.8198	8.50266	8.00196	7.21156	7.58663	6.77108	7.81251	7.68111	8.15254	7.1499	8.09976	8.05185	8.22337	7.91824	8.25409	7.90415	7.81603	7.50676	7.84723	8.04604	8.25785	7.53478	7.47644	7.99868	7.88215	9.09022	8.66565	8.81629	8.11186	8.39065	8.28689	7.7581	8.13035	8.1756	8.34987	7.99634	8.1542	7.67611	8.52934	7.89839	7.87622
AGPAT2	5.91127	5.90058	6.38919	6.14349	6.03707	5.56665	6.58237	5.26378	5.38776	6.3286	5.40566	6.05359	6.04744	5.98041	5.55159	6.09852	5.91537	6.00494	5.56698	6.12409	6.07793	5.9867	6.29	5.94731	5.88774	6.67695	6.28776	6.41107	6.0444	5.07857	5.89691	6.10268	5.28914	5.30308	5.11714	5.49914	5.95031	5.81538	5.73936	5.17595	5.24683	5.16183	5.82311	5.87887	5.41763	4.28549	5.9826	5.88422	5.59949
AGPAT3	6.31923	7.10512	6.34005	6.5848	6.86712	6.18138	6.2692	6.82067	6.10207	6.94348	6.45529	7.46814	7.06448	6.93208	6.89608	4.97015	7.66872	7.47102	6.86381	6.41832	6.69152	6.40142	6.72737	6.93333	8.3913	6.28281	6.50753	6.20162	6.54495	6.82728	7.18541	7.07955	6.38972	7.52339	6.65512	7.18291	7.68535	6.7441	6.93105	6.88884	7.11475	7.56823	7.07013	5.6355	6.85785	5.9771	4.96535	5.98165	7.75251
AGPAT4	8.67793	8.66149	6.83139	7.85708	8.64119	8.02538	6.42457	8.43365	8.29533	8.05621	8.23003	7.12802	7.83313	7.1911	7.65363	6.91793	6.84061	7.61793	7.04486	6.87457	7.92287	8.09472	7.88717	8.3025	7.42605	7.10186	8.53864	7.1791	8.76285	8.48516	6.76555	8.68226	6.99291	7.86469	8.23524	8.05529	7.16981	8.42741	8.5237	8.80539	8.0947	5.04442	7.9608	7.54854	7.81974	7.54432	6.05785	7.90447	6.35773
AGPAT4-IT1	5.66396	6.96948	6.32442	6.08279	6.30154	6.45738	6.19494	7.0149	6.74228	6.68067	6.66797	5.44067	5.442	5.3946	6.49195	6.66934	6.02031	5.93955	5.73957	5.85432	6.80378	6.31199	5.78518	6.20333	5.88157	6.02657	7.67078	6.47536	6.77224	7.33746	6.17752	7.79333	6.55399	7.5001	7.20765	7.79006	6.0714	7.27174	6.97182	7.65326	7.19091	5.24298	6.93136	6.15827	6.51818	7.30964	6.14973	7.10776	5.46829
AGPAT5	9.05514	8.88663	8.00006	8.79274	9.45241	9.51178	7.25477	9.84846	9.71496	9.46503	9.46732	8.01977	8.63502	9.11034	8.13861	8.47314	7.84038	9.08086	8.83273	8.01741	8.35395	9.66718	8.77676	9.5999	8.25884	7.34125	7.55623	7.19762	8.31742	8.47379	8.74061	7.25346	7.67153	8.31536	8.38168	8.68278	7.13031	8.79247	8.85044	8.44146	7.80912	8.64862	8.20351	7.86033	8.38058	8.34842	5.68357	7.20377	7.78297
AGPAT6	7.82374	8.09715	8.68242	7.77454	7.89707	8.57926	8.25859	7.838	8.46735	7.88387	8.95884	7.06968	7.35058	7.14447	7.45911	8.71758	7.67337	7.63181	7.85051	8.10286	8.33292	7.60548	8.31408	7.38349	7.17241	8.4416	7.63585	8.37449	9.48373	8.31272	7.96621	8.6884	8.37405	7.86292	8.47212	8.04142	7.70787	8.66441	8.11555	7.90337	7.39848	7.30789	8.27335	7.82586	7.8264	8.33219	8.18144	7.53419	7.06305
AGPAT9	3.22823	2.89121	3.2694	5.06513	2.89541	3.21581	5.53773	2.93945	2.90283	3.81376	3.62928	3.32613	3.1673	5.12164	3.13577	3.18147	4.68094	8.18185	4.47095	3.2345	4.00677	2.93352	4.49077	3.234	2.88958	8.73161	3.46293	4.0123	2.63563	3.2268	5.91343	4.70234	3.10671	3.21417	3.42204	3.08765	4.14483	2.84969	3.7214	5.38951	3.2605	3.0533	3.13636	3.40907	2.67644	2.75594	10.4189	3.21407	3.4148
AGPHD1	3.79699	3.45379	3.37946	3.99464	3.29057	3.58714	3.86151	3.44119	3.66738	3.39795	3.36883	4.6295	3.2137	4.13748	3.81908	3.79976	4.10828	3.31393	3.92908	3.74555	3.59527	3.67032	4.34554	3.64596	4.2208	3.52958	4.02181	3.45089	3.68695	3.09609	3.50491	3.62005	3.18466	3.69188	3.52693	3.28384	3.8182	3.32856	3.42122	3.8476	3.94873	3.36318	3.49767	3.25232	3.28423	3.65263	3.9861	3.48946	3.80636
AGPS	6.96927	6.48075	5.8753	7.18818	6.87633	6.697	6.97331	7.02103	5.45607	6.85712	7.57578	7.84177	7.44051	7.78419	6.74847	6.23752	5.88451	6.39184	6.3958	6.5228	5.5875	6.39245	6.86006	6.80267	6.56744	6.78769	6.35468	6.27436	4.7676	6.26442	5.7022	4.40483	5.10783	5.84168	6.11179	5.2571	5.01404	4.90584	6.36817	5.95125	5.58908	6.25795	6.25286	7.09429	6.98016	6.60368	7.51393	5.55603	5.17121
AGR2	3.13926	3.24136	3.40785	3.23565	3.24396	3.16261	3.2805	3.16862	3.24962	3.02727	3.25741	3.1916	3.32475	3.46275	3.13493	3.81507	3.27779	3.16565	3.27957	3.289	3.37352	3.37093	3.45552	3.3278	3.10253	3.48866	3.54492	3.64536	4.11493	2.87752	3.43501	3.13302	3.26362	3.25374	3.37084	3.10735	3.17439	3.22165	2.99485	3.0647	2.98874	3.22753	2.87067	3.42873	3.37282	3.48041	3.42657	3.21862	3.59939
AGR3	2.61208	2.66577	2.61205	3.13617	2.76827	2.5391	2.73648	2.73789	2.80783	2.71611	2.55353	2.65686	2.71064	2.75893	2.53403	2.96979	2.61515	3.9798	2.5908	2.69532	2.47738	2.52769	2.66366	2.86218	2.71582	2.6494	2.60459	2.9834	2.80515	2.99614	3.10687	2.95428	3.30554	2.85464	2.81555	2.87169	3.02591	2.98151	2.59741	2.6876	2.91917	2.9098	2.84568	2.72306	2.85585	2.83944	2.8212	2.78986	2.84467
AGRN	6.54453	6.80981	7.3095	7.01268	7.24269	7.34824	6.06768	6.512	7.41689	6.4425	6.36501	6.95695	6.97899	7.18108	6.79949	7.54085	7.03343	6.98533	6.92117	6.74452	7.36634	6.64685	7.19784	7.02646	6.70526	6.64357	7.48798	8.44211	8.73864	7.98958	7.88515	7.8343	8.03876	7.7836	7.94739	8.17646	7.51443	8.1477	8.16871	7.67401	7.56696	6.80164	8.94461	7.02691	8.27507	7.15565	8.28	8.04081	6.99099
AGRP	4.44979	4.63042	4.72462	4.8737	4.52555	4.35722	5.04374	4.7382	4.89956	4.44655	4.4529	4.48023	4.47759	4.87016	4.3628	5.07765	4.71227	4.43935	4.43539	4.49091	4.80505	4.43105	4.6019	4.64447	4.61415	4.90517	4.84539	5.42794	4.78748	4.71828	4.60379	4.81655	4.92869	4.70461	4.70677	4.67906	4.54222	4.76366	4.69689	4.61463	4.62642	4.81609	4.48636	4.47069	4.49556	4.56369	4.61529	4.68775	4.8045
AGT	13.3842	8.86572	11.7058	10.5681	12.3807	10.1274	8.58381	10.2485	10.5772	11.4741	10.7674	11.6065	9.96749	10.1989	12.6675	9.29793	8.99719	11.9761	12.4167	9.83412	10.459	5.13206	10.5198	9.55856	9.76706	6.12601	10.1269	12.2231	11.7933	10.0272	9.16325	10.9402	9.18739	11.0692	12.0753	9.47461	10.7665	10.3984	13.3338	9.21024	12.0996	9.40478	9.53336	8.87422	7.36909	11.5304	4.69165	9.81175	11.4149
AGTPBP1	7.86602	8.68335	6.82497	8.35907	8.65757	6.48807	8.10055	8.77965	5.34721	9.033	7.52753	8.86713	8.90426	9.02124	7.89308	7.0075	7.19703	8.56069	8.37902	8.29851	7.39341	8.52982	8.90886	7.97658	7.81267	7.75	8.79511	6.95151	7.40911	8.33458	7.0468	7.95556	4.68228	8.14029	7.39341	8.10174	8.17623	8.39819	7.94877	7.4379	9.04628	6.56943	7.9071	9.83681	7.9421	5.23536	7.14504	7.7517	7.98758
AGTR1	4.11947	3.74013	3.30133	4.92085	3.80968	3.01599	3.75713	3.39651	3.16214	3.25003	3.27238	5.29163	5.64988	4.05969	3.3514	3.81592	3.27768	3.40965	3.41178	3.06358	3.13207	3.26702	3.17544	5.68839	3.49405	5.16559	3.08217	3.33556	2.97982	4.01333	3.60601	3.5952	3.21315	3.18953	3.33771	3.14028	3.67277	3.26141	3.21458	3.84777	2.98587	3.16393	3.20021	3.43256	3.04768	3.32434	3.17355	3.41855	3.28645
AGTR2	2.97563	3.10486	3.26329	3.10182	3.06989	3.05541	3.13012	3.10819	3.27516	3.02656	3.14276	3.10142	2.98329	3.04286	3.02907	3.62678	3.16146	2.80154	3.19359	2.93102	3.4281	3.25126	3.07758	2.90112	3.17074	3.19968	2.98271	3.54994	3.61732	3.48617	3.05541	3.16071	3.8228	3.27026	2.87402	3.25639	3.15003	3.09513	2.99485	3.05703	3.07242	3.10671	2.93631	3.14531	3.22735	3.11329	3.3202	3.18098	3.05437
AGTRAP	7.11452	5.63203	5.08618	7.16765	6.48992	6.6703	7.22293	5.85229	5.79771	7.58739	6.68181	7.19191	6.58306	7.08732	6.05844	7.3687	6.19476	7.53397	6.80516	6.71881	5.9389	6.28132	6.78974	6.78987	6.82699	7.13598	6.27587	5.89682	5.18308	4.99331	6.67102	6.6465	5.84342	6.43979	6.94993	5.79911	5.89757	6.25447	6.76934	7.08865	7.09019	5.56773	6.71777	6.98692	6.64323	6.53422	8.0372	5.25592	5.77676
AGXT	3.94516	4.12217	4.05098	4.44807	4.02461	4.03973	4.26913	3.98548	4.05314	4.31494	4.17091	4.03873	4.26728	4.21969	4.30981	4.46844	4.08883	4.01627	3.85604	4.09779	3.88179	4.32173	4.16993	4.71658	4.10108	4.22619	4.41004	4.20612	3.90316	3.60527	3.92803	4.04411	4.14198	4.60637	3.86843	4.25564	3.89112	4.44573	3.50718	3.74369	4.07667	3.92944	4.05331	3.88216	3.83677	3.81273	4.13228	4.1744	4.06067
AGXT2	3.54288	3.66684	3.83724	3.73901	3.41164	3.82005	3.83066	3.62051	3.78397	3.55444	3.67974	3.63635	3.53959	3.60812	3.42096	4.91806	3.60792	3.57998	3.20717	3.30946	4.00253	3.80929	3.73076	3.60583	3.63431	3.4351	3.60818	3.85038	4.00407	3.68024	3.57391	4.12993	3.98983	3.49145	3.26435	3.54771	3.54853	3.65698	3.47411	3.34026	3.30233	3.54941	3.55833	3.66135	3.69668	3.78932	3.49858	3.55132	3.59198
AGXT2L1	7.19692	4.50197	4.33919	7.69941	6.86418	6.2087	5.05156	7.95841	5.40529	4.75155	4.47007	7.42039	3.77871	3.9294	8.71932	3.97767	7.43499	3.86352	9.03527	6.57198	3.64336	4.82305	4.02271	3.90517	7.9521	3.88784	6.6552	3.72974	3.79438	7.52874	6.08565	6.30095	4.55362	8.29689	6.07634	6.44936	10.5917	8.80513	7.46159	3.3108	11.529	5.22748	4.47949	3.61485	3.59276	3.51654	3.54968	7.8848	11.8621
AGXT2L2	6.25159	6.08289	5.8443	5.87729	6.44132	7.21004	8.34645	5.73337	8.10713	6.95305	5.8247	6.30781	5.52701	5.67271	6.54176	7.11807	7.79222	6.95029	6.22372	6.11348	8.0785	6.27192	6.90787	6.6676	6.23666	6.56189	7.72726	7.92083	6.25253	7.16649	8.69523	8.38331	8.52039	7.77014	7.10908	7.5163	7.20981	7.90687	7.54284	8.06418	7.52038	7.84132	7.6516	7.88336	7.06144	7.2454	7.72613	7.81117	7.36201
AHCTF1	6.90146	8.12163	7.63669	7.05883	6.7775	7.34413	7.26682	7.77533	7.33102	7.11751	8.08196	7.47573	7.65626	8.05548	7.85733	7.7923	6.98327	7.35146	7.18574	7.38992	6.81205	7.24741	7.17279	8.04831	7.51235	7.43825	6.8844	7.57807	7.58053	7.50143	6.54787	5.88567	6.88761	7.34613	7.32937	7.52438	6.39229	6.82209	6.4822	6.38823	6.44548	7.39997	6.30841	7.62898	6.42439	7.37664	7.4515	7.4017	6.87365
AHCY	8.21392	9.44591	7.63304	8.63644	8.70855	9.36961	9.63311	7.93969	8.17516	8.91697	9.05154	9.34357	9.05323	9.64057	8.08836	10.1662	9.43443	8.38053	8.22836	8.33204	8.0458	10.0009	8.37186	10.0161	8.78551	8.56266	8.44169	8.20824	7.7507	8.32633	8.86888	7.90926	7.92192	9.41235	8.23346	9.24621	8.42094	9.11477	8.13163	7.72854	7.9859	8.09366	8.5853	9.50502	9.53554	7.84786	9.21983	9.25283	7.7256
AHCYL1	10.9065	9.4058	8.44732	10.5025	10.3477	9.97302	8.8332	9.51739	10.1369	9.84075	9.20687	10.6295	9.85239	9.53609	12.0813	9.27391	9.20887	9.06892	11.3513	10.4772	9.2544	8.99702	8.81111	8.95061	8.92194	8.85045	9.35838	9.18911	8.46699	10.1058	9.91092	10.9334	9.43175	9.40811	9.57213	8.64641	10.4178	9.1498	11.8849	9.05442	11.2425	8.89606	9.44134	9.461	8.59755	9.71122	8.68869	8.8223	10.2458
AHCYL2	8.35532	7.3511	8.29552	7.40484	7.14149	7.42132	7.27697	8.13127	9.03154	7.74184	7.95563	7.65463	7.69814	7.19957	8.40866	8.21345	7.88109	7.52846	8.10606	8.06063	7.50931	8.65112	7.41069	7.35027	7.5877	6.63477	6.98204	7.32669	7.19692	7.95291	8.61059	7.98011	6.7696	7.73542	7.64062	7.16682	8.03902	6.49414	7.85203	7.64606	7.96305	8.38832	6.27336	6.75084	6.83787	8.44078	7.27724	6.98794	8.70773
AHDC1	5.72227	5.22131	6.39202	5.4572	5.80806	5.37572	5.63292	5.88967	5.05174	5.60007	4.76324	5.9886	6.10724	5.97388	5.76909	5.85492	5.64967	6.2934	6.0565	5.65604	5.84594	4.15524	5.54516	5.90226	5.07771	4.74185	5.34642	5.71937	6.6715	4.58829	5.55831	6.90196	5.92598	5.82658	5.62227	4.87565	5.31941	4.88038	5.94597	4.8148	5.78313	5.55594	5.43972	5.77526	5.07399	5.74713	5.78331	5.41819	6.18213
AHI1	7.19028	6.27472	8.11501	6.76525	6.69813	6.45017	7.73435	6.76977	7.58553	6.72721	6.71963	6.51592	6.46083	6.03933	6.61097	6.44239	7.06215	6.10122	6.93782	7.17364	7.90652	7.14584	6.80391	6.94355	6.79277	6.7878	7.89697	8.75637	7.48421	7.40033	7.81649	8.14744	8.73847	7.56665	7.61219	7.98055	8.55905	7.5774	7.88391	9.38101	8.14434	7.07053	8.324	7.91812	7.82483	8.34884	7.26065	9.06747	8.19824
AHNAK	9.63558	6.52988	7.78649	9.82745	8.67179	7.04492	9.88813	8.21838	9.31792	8.31379	8.75523	9.73511	7.5601	8.50299	8.96354	9.04193	9.01893	9.40694	8.53941	9.0776	8.62496	9.69027	8.44236	8.46671	9.6731	10.6716	9.22476	7.33113	6.46177	7.05237	9.37046	10.1653	7.24453	7.80763	7.16681	7.10089	8.53519	7.79353	9.87737	8.75203	9.24952	6.32939	7.86299	8.39075	6.83014	6.67984	9.85757	7.69753	9.32059
AHNAK2	8.44301	5.0325	7.52173	7.55908	4.24311	3.97564	10.2985	4.46528	4.16515	6.69911	8.26021	8.00959	6.81189	6.49678	5.27907	9.01647	5.84474	9.84363	6.09214	7.32365	5.45345	5.4103	5.73695	5.62569	4.86583	9.61787	6.73902	5.10836	5.15239	4.98576	6.90443	6.45817	3.86803	5.69013	4.43511	4.48129	7.01275	4.79825	6.31504	5.70903	5.56992	4.51467	5.72049	6.32729	4.28826	4.2962	10.8891	5.16441	6.3472
AHR	10.6449	6.82873	9.29132	10.2456	9.54324	6.71577	9.482	6.50347	5.61133	9.2248	7.12758	8.20787	8.63166	8.90451	9.21188	7.36142	8.86222	8.99364	10.1665	10.8494	8.60663	5.6032	8.3289	7.4576	10.0832	10.8034	8.79044	6.75832	8.73588	8.90108	8.57959	10.1307	6.57857	8.32756	8.50342	6.43878	7.86683	7.55614	9.00777	8.5048	7.60683	6.27751	9.59303	8.05534	8.87406	6.62995	10.1263	7.69735	8.21396
AHRR	4.5436	4.07702	4.64868	4.76376	6.113	5.36651	4.53298	7.08441	5.01317	3.76897	4.4131	6.0258	4.20236	4.80499	4.00263	4.92873	4.77958	4.40159	4.04526	4.7004	4.65678	4.47363	5.28167	3.64746	5.95074	5.98566	4.60513	3.98425	6.84346	5.38908	3.93425	4.31476	5.10341	3.84427	4.29343	4.66475	4.96921	3.76215	4.73252	3.79296	4.26064	5.22357	4.64868	4.86108	3.95985	4.94472	3.97358	3.87102	8.15375
AHSA1	8.97229	9.60427	8.52582	8.90355	8.55339	8.99115	8.22432	8.62969	9.41147	9.39992	9.42645	9.03996	9.79058	9.50754	9.17491	9.8087	10.3487	8.87173	8.92349	9.14184	8.83788	9.59456	9.24278	9.30321	8.7971	9.5008	8.71144	8.26047	8.57481	9.30713	8.67814	8.62737	7.62665	9.56247	7.98014	8.94417	8.65574	8.52966	9.08914	8.27382	8.67228	8.93085	9.33802	8.17315	8.98852	8.83592	10.0315	8.34544	8.58385
AHSA2	5.61745	5.40841	6.92888	5.05537	4.19496	7.07542	8.0119	5.51451	6.86131	5.70903	7.50069	6.06784	5.4143	6.51702	5.8876	7.66744	8.44393	6.77037	6.55931	5.88878	6.62007	6.67891	5.74612	7.7717	5.24018	5.0518	7.2278	5.09874	5.61853	7.39971	6.99052	5.75073	6.42414	5.13476	5.57452	4.82878	6.70519	5.30295	7.11915	7.41886	5.71756	3.7683	5.18923	6.51227	5.50357	4.34616	7.04161	4.13869	6.16368
AHSG	3.44078	3.64462	3.28217	3.26773	3.46617	3.36127	3.08467	3.11961	3.34284	3.45864	3.41925	3.19701	4.18693	3.57904	3.66832	3.7256	3.3778	3.43075	3.71908	3.59022	3.33276	3.69134	3.30657	3.67139	3.37928	3.34083	3.46968	3.53938	3.3778	3.43468	3.61106	3.17864	3.43387	3.19796	3.24544	3.32556	3.13727	3.35036	3.11188	3.28092	3.09244	3.54516	3.40918	3.74513	3.54838	2.94523	3.65111	3.1271	3.11015
AHSP	4.84665	4.90396	5.03569	4.63027	4.6566	4.71205	4.62426	4.96242	5.11843	4.92908	4.72908	4.64776	4.66087	4.51624	4.763	5.17001	4.59285	4.60136	4.62407	4.74714	5.11843	4.74306	4.64209	5.08722	4.7677	4.63719	6.19258	5.24183	5.45871	4.84248	4.94516	4.77103	4.88264	4.72533	4.70677	4.71597	4.93195	4.83413	4.52611	4.54831	4.51607	4.56436	4.59256	4.82548	5.09154	4.83052	5.04742	4.67552	5.09708
AICDA	2.9566	3.13966	3.0545	3.33121	3.03476	3.00314	3.37789	3.24489	2.94883	3.01459	2.90398	3.15441	3.02157	2.96429	2.81508	3.20398	2.99766	3.04254	2.9855	3.06329	3.16585	2.9445	2.92394	3.0597	2.90524	2.85288	3.03545	3.33018	3.34154	3.15279	3.03306	3.09656	3.65176	3.00839	2.91096	2.882	2.97861	3.56143	3.03483	2.79617	2.99369	2.96308	3.06076	3.26571	2.99787	3.03849	3.03596	3.12269	3.26537
AIDA	9.33625	9.0045	7.79803	9.67488	9.38539	8.5629	7.68581	9.43676	7.87181	9.02763	9.15262	9.93511	9.81841	9.67541	9.90114	8.93217	8.96166	9.54716	9.26392	9.03294	7.94431	9.1493	9.00402	9.7396	9.48155	9.0631	8.1713	5.65592	6.57968	8.79728	7.42223	7.16894	6.26756	8.72233	8.42741	8.28568	8.01337	7.00388	8.50758	8.9201	8.82056	8.78631	8.11185	9.48765	8.45869	8.64038	8.18844	8.3434	7.87339
AIF1	10.1779	7.30946	8.04298	9.71382	8.55577	8.01153	9.52879	5.85276	7.14799	9.41752	6.96629	10.2982	7.9751	8.50097	9.57342	7.70388	8.47762	8.69141	8.26107	9.75027	8.85329	6.03241	8.3521	8.07406	9.25293	9.27909	10.3164	7.98345	6.62387	6.45197	9.21851	8.93384	6.73767	7.88919	7.91915	8.11996	8.3933	8.56336	8.28801	9.12951	9.39759	6.70189	9.47886	6.91751	7.36676	5.32059	7.72209	7.08053	6.65263
AIF1L	6.73315	8.49787	10.4418	7.41247	9.83308	7.64156	5.05313	6.78927	7.92708	8.6456	7.57585	8.17365	9.07201	7.34683	6.96013	8.60402	10.6501	5.77146	8.58238	7.30097	8.98976	6.92952	9.5109	9.19703	8.96472	8.32057	10.6273	9.56771	8.64876	9.59743	9.6541	8.15391	8.12707	9.07124	9.41298	10.2562	9.41568	10.8601	7.95448	10.2372	10.1411	7.69962	10.3586	9.11988	10.1793	8.32384	4.20407	9.56209	8.94081
AIFM1	7.12736	7.51168	5.9882	6.90968	7.28363	7.22212	7.23946	7.1519	7.48345	7.72291	8.04124	7.65393	8.57868	8.575	6.74034	6.71101	6.66026	7.06061	5.64309	6.39153	6.34763	7.28745	7.76309	8.18583	7.03294	6.71884	6.68083	7.37015	6.20369	6.80797	6.8912	7.20701	6.94999	6.78914	7.6225	6.9687	6.83215	7.06585	7.08742	6.65313	6.55517	7.21249	6.7365	8.65895	7.40821	6.86753	8.21811	6.66693	6.11862
AIFM2	4.86201	4.76099	6.14192	6.44538	4.85264	4.84341	7.20083	4.85711	5.31014	5.57447	7.34756	6.64902	5.8379	5.80806	4.8243	6.44185	6.10668	6.61742	5.4966	6.08248	5.44469	5.23462	5.7619	6.5038	6.37025	7.08973	6.05403	6.99049	5.82778	4.44815	6.18999	6.13564	5.5016	5.09793	6.34925	5.36923	5.29636	4.70418	5.6054	5.58656	5.53387	5.6893	5.44443	5.83368	6.80825	5.31706	6.98652	5.04672	4.97872
AIFM3	5.92716	4.73267	5.211	5.79143	5.00696	4.97499	4.99774	5.42173	5.24486	5.04505	5.22751	5.15031	4.88459	4.91819	4.64646	5.48511	5.73965	5.24963	5.52132	4.79555	4.79337	5.01939	4.85178	4.85106	5.63123	4.96433	5.60241	5.22326	4.96376	4.78845	6.14752	5.31362	4.87707	5.29295	5.16246	4.97296	7.09258	5.38706	5.38757	4.44678	6.64451	4.5375	4.87494	5.06629	4.95018	4.50009	5.07635	5.46912	6.68656
AIG1	5.26103	4.64013	4.56131	4.06729	4.13821	4.89633	3.97191	4.42455	4.78212	4.25026	3.52768	5.19913	3.71706	4.58839	4.65049	4.37906	4.20471	4.15331	5.20382	3.67774	4.80924	4.96113	3.8648	4.90576	5.02961	3.58211	4.44996	6.26255	6.75777	5.80221	6.09408	4.98626	6.38972	6.35858	6.26499	5.64244	5.88216	5.10616	6.24495	5.97606	6.5372	5.10864	5.43356	4.7549	4.7272	5.25364	5.54699	5.80541	6.1441
AIM1	5.17142	3.84353	3.97149	6.15441	4.0825	4.25365	7.01067	3.87234	4.16156	5.94938	7.71961	4.29275	4.38567	5.64779	4.25018	3.96715	9.22641	5.66906	6.39565	7.78664	7.73675	3.72289	5.70338	5.00089	6.00886	9.40796	5.72722	4.3728	3.52783	3.3202	7.10642	4.36677	3.71635	4.96747	5.62227	3.69067	4.1566	3.98303	4.75631	4.74462	4.65078	3.53328	5.1536	4.43355	3.90521	3.1171	9.21328	4.66348	3.34833
AIM1L	5.53875	5.63051	5.71191	5.72246	5.81211	5.95185	6.33382	5.47623	5.49112	6.06078	5.9059	5.63446	5.9151	5.58759	5.49239	6.39	5.91399	5.70923	5.4057	5.55644	5.64305	5.52805	5.73045	5.79001	5.81722	5.98	6.26949	5.49193	6.00465	5.10633	5.715	5.66918	5.61722	5.75025	5.14422	5.56637	5.72821	5.6757	5.37461	5.229	5.23866	5.84456	5.35658	5.32228	5.72574	5.1936	5.64012	5.39967	5.36942
AIM2	6.44138	6.04075	6.59779	6.69261	5.39881	4.94871	4.63911	4.21427	4.02127	5.93899	7.63444	4.46062	5.84124	5.22167	5.93011	4.21965	4.16024	6.69248	5.08522	5.572	5.13727	4.04525	5.08106	3.70208	5.8868	7.59764	4.55688	7.35608	6.10992	4.9727	4.86356	5.78207	4.92319	4.30321	6.74161	5.09151	4.88679	5.6901	4.89359	4.30115	4.38547	4.05768	5.43972	4.27144	4.52104	4.68598	9.89972	6.03653	4.03704
AIMP1	8.77604	6.99564	6.04949	7.51187	7.81102	7.07781	5.66245	7.17925	7.09178	7.69695	7.59327	5.75695	7.21038	8.22029	7.57388	6.16295	7.18086	7.85384	7.65825	7.2825	6.5941	8.23666	6.97713	7.81847	7.95036	7.49815	5.79051	5.38737	6.83347	6.78821	6.51118	6.43677	6.77872	6.69937	6.27799	7.04508	6.51518	6.85006	7.04611	6.86128	7.0519	6.01547	6.47802	5.48493	6.88418	6.88334	6.27261	6.92232	6.55107
AIMP2	8.83576	9.35734	7.05867	9.16177	8.63652	9.16138	8.77831	9.13399	9.01591	9.4047	9.66128	8.8481	9.47461	10.3298	8.60774	9.56631	8.65759	8.69744	8.08372	8.44008	8.18949	9.04738	9.37591	9.55521	9.08118	9.30907	8.73389	9.68865	7.96617	8.72384	8.36461	9.51646	8.66755	9.08067	8.86479	8.97661	8.69138	8.85587	8.67586	8.35144	8.34095	8.59875	8.66721	9.11797	9.46508	8.97252	9.5882	8.76096	8.16473
AIP	6.04544	5.35681	5.04731	6.49203	6.6503	6.01296	5.58798	6.64639	6.03446	6.44845	6.24624	6.60435	6.31993	6.22914	6.30082	6.03397	6.36128	6.75552	6.42332	6.52238	6.38437	6.73288	6.71684	6.70853	6.77771	7.03639	6.11566	5.19495	5.5007	6.06639	6.29317	6.52014	5.91398	6.77569	6.71057	7.04853	7.02106	6.46284	6.93945	6.89108	7.43762	6.76991	6.74049	7.27037	7.83462	6.6185	7.52208	6.11607	6.53576
AIPL1	5.0446	4.91443	5.14031	5.04097	4.86307	4.87997	5.03302	4.96251	5.17889	5.06963	4.87303	4.78454	4.60587	4.7991	4.88672	5.331	4.86519	4.9194	4.78862	4.7956	4.87177	4.78451	5.38328	5.1545	4.90674	4.90511	5.10905	5.48398	5.32299	4.40067	4.65314	4.85811	5.14276	4.95123	4.88622	4.71041	4.53875	4.7225	4.61227	4.6127	4.8326	5.16388	4.30274	5.13902	4.56503	4.65797	5.00918	4.71224	5.32061
AIRE	4.92255	5.06662	5.46584	5.34173	5.16133	4.81634	5.12786	4.88354	4.89241	4.83863	4.88007	4.86215	4.7042	4.9814	4.91365	5.24127	5.24289	5.12001	5.29114	5.02739	5.15976	5.02715	4.91916	4.97581	4.79912	5.42023	5.37192	5.02219	5.05427	4.39384	5.25985	5.16701	4.85552	4.91034	4.86493	4.75151	4.6271	4.91142	4.85175	4.76119	4.58733	4.86759	5.10329	4.75185	4.72836	4.65249	5.24587	4.96615	4.967
AJAP1	3.92443	6.69451	4.41436	3.97549	7.95136	4.24398	3.92978	4.49629	4.53713	4.20323	3.92699	4.64886	4.82228	3.67133	3.91372	4.55932	6.36273	5.74694	8.06766	6.20016	7.51722	5.15453	6.78751	4.23153	4.34208	4.38523	4.98939	4.96607	4.7401	5.58886	6.54717	4.26707	5.23135	5.5617	4.6864	5.30913	5.88398	5.05409	6.20219	6.88922	6.32429	5.08739	5.22145	5.30126	6.04154	3.96951	4.08264	4.61477	6.1565
AJUBA	8.72076	4.23914	4.39307	6.58503	4.42779	7.3266	5.14412	7.48655	6.77269	5.60934	6.08741	7.21204	5.84249	7.74598	5.34378	5.98017	7.68101	8.11026	5.05318	5.48443	4.65935	8.01294	5.26144	7.83164	6.76229	5.90603	6.03236	4.60126	4.19698	3.95397	6.41632	6.51414	5.48654	5.22747	5.86128	4.63939	3.7575	4.26898	5.31768	6.0619	4.17616	7.13424	5.73107	4.29066	3.47502	6.87511	5.11628	2.73411	5.60324
AK1	8.83432	7.24835	7.83024	8.45986	8.1926	7.06567	8.50027	7.39903	7.29858	8.06517	6.65043	7.47503	7.62904	8.28976	8.11404	6.40424	6.44828	10.5708	7.83253	6.9659	6.87483	5.89553	8.36107	7.62443	7.48655	8.86832	7.65604	9.35368	7.60724	7.11986	7.81222	8.78845	8.25011	8.13744	8.53279	8.93647	8.66309	9.07832	8.3567	7.74467	9.74956	8.03188	8.9986	9.083	8.92328	8.17069	8.56354	8.93068	8.63256
AK2	4.25824	4.86623	5.21066	4.46335	4.24358	4.85622	4.9104	4.95738	5.75154	4.67068	4.88808	4.78872	4.56899	4.38223	4.37658	4.91164	4.61645	4.24282	4.13695	4.28762	5.70569	3.88582	4.81472	4.37874	4.10736	4.05264	4.95058	6.89984	6.26242	6.41105	7.47656	7.34014	7.9262	7.32975	7.34129	5.92688	5.93675	6.79779	7.16819	6.64612	6.43317	6.05603	5.99017	6.806	6.88731	6.8644	5.77293	6.35751	6.06754
AK3	7.78119	7.16336	7.19439	7.56138	8.17622	6.15928	6.50757	3.4104	8.01919	7.32692	7.12568	7.85973	8.1277	8.23008	8.0919	7.22429	7.49635	7.94335	8.54574	7.33972	7.89022	8.01786	8.45055	8.01496	6.5113	8.0395	7.52492	7.24601	5.31251	7.41483	7.30272	6.99935	5.90665	7.163	6.43114	7.15353	7.18321	6.97557	7.48236	7.97898	7.8392	3.97978	7.59768	8.49143	7.82496	7.58054	6.86527	8.46794	6.29309
AK4	6.59889	8.12341	9.30767	9.10854	8.30192	10.4472	9.33021	7.89971	7.89283	9.64612	9.09273	9.44291	9.95606	10.1529	10.5729	9.96106	8.20194	10.1766	8.18983	9.68171	6.77738	8.91723	8.42716	10.9267	9.0465	9.44737	9.36586	8.36803	7.13439	7.50189	9.42351	8.74177	6.3335	8.24613	7.97089	7.58421	9.20418	7.54057	9.67255	4.45876	8.77712	9.37442	7.56245	8.57407	8.70898	8.29081	7.16356	7.68043	8.98856
AK5	5.33922	5.80135	4.01618	5.98273	4.38536	3.82441	3.8962	4.48923	4.57832	5.11753	4.31412	5.88444	4.15438	4.13398	4.96952	3.81059	7.69697	3.94521	8.10456	8.14725	7.73211	5.59632	4.87093	3.81267	3.99901	4.03819	7.49483	3.50057	3.56619	4.28299	4.80487	3.56561	3.53805	7.44235	4.52551	6.51304	9.5713	6.44144	5.95014	5.82413	8.25211	4.21134	5.13688	3.97546	3.50565	3.62523	3.43532	3.83865	9.88905
AK7	3.43243	2.83381	2.71806	3.00552	2.89063	2.60293	2.80862	2.87463	2.96765	2.95678	2.7329	2.61452	2.99096	2.94004	2.76157	2.95157	2.85496	7.44148	2.96283	3.43273	2.89321	3.41334	2.926	3.42898	4.88384	3.07903	2.87578	3.29768	3.22536	2.99709	2.90062	3.10914	3.13231	3.09311	3.28685	3.07132	3.19087	2.92788	2.9771	3.07983	3.80995	3.13517	3.10764	3.33873	3.0977	3.09681	3.12682	3.21625	3.62546
AK8	5.80441	5.78028	6.00859	6.15051	6.04748	5.78672	6.2317	5.80441	5.56463	5.54708	5.55869	6.15174	6.43563	6.0196	5.89839	5.83788	5.34746	6.24473	6.01478	5.92903	5.89369	5.97872	6.78738	5.97423	6.01322	6.2065	6.21035	5.90034	6.3753	5.27849	5.95812	6.09513	5.69528	5.95316	5.6873	5.29787	6.14209	5.86511	5.98477	5.20187	6.26215	5.63697	6.16947	5.67447	5.8918	5.46713	5.62769	5.62512	6.43979
AKAP1	8.46072	9.46021	8.43891	8.02374	8.2203	8.13847	8.93663	7.81945	8.10146	8.37876	8.24738	7.77922	7.45854	7.77516	8.13591	7.95456	8.1151	8.30623	8.23962	8.15533	8.17608	7.45642	7.96709	7.49501	7.84709	7.38531	8.01674	9.41061	8.25282	8.83588	8.5744	10.1145	8.32893	8.55801	8.50562	8.81797	8.65568	8.6119	8.49811	7.73629	8.73039	7.73577	8.20452	8.05067	7.86442	8.19634	8.73683	8.20844	8.45699
AKAP10	5.86116	7.55439	8.78557	5.63759	5.94155	7.58709	8.43151	6.44745	9.09278	6.68661	6.85735	6.13282	5.6004	5.80679	6.95106	6.97493	6.69794	6.85492	6.6645	7.22715	8.06862	6.43011	5.80355	5.86777	6.67755	6.89305	7.89482	6.23187	7.87881	7.27568	7.4812	6.35274	7.95035	7.28334	7.11366	6.84856	6.55519	6.91476	6.5319	7.44117	6.45861	7.03127	6.19448	6.73305	6.59308	7.85492	6.356	6.65379	6.84334
AKAP11	5.27858	5.30275	6.21184	4.57521	5.34984	6.17987	6.31233	5.40348	6.34098	5.30643	5.47526	5.60592	5.65834	6.10866	5.76083	4.40101	6.32837	6.51652	5.90284	5.0834	6.75129	5.81855	5.83095	6.40241	5.31103	5.57184	6.24834	7.34348	6.71477	6.69682	7.44968	7.01253	7.01055	7.24431	7.26528	6.79459	6.32006	7.24441	6.98112	7.93418	7.30508	7.05715	6.60254	7.41104	6.63692	6.24592	7.16826	6.89751	6.65595
AKAP12	5.92255	4.72424	4.00479	5.52739	5.61952	3.73272	3.74806	5.2877	5.65704	5.54882	6.70172	3.39231	5.25051	4.85227	4.39297	3.67686	5.17204	5.79104	5.677	6.21691	4.63097	5.62905	4.80075	4.56927	4.21564	5.62925	3.85281	4.02788	4.87005	8.97085	6.4944	6.0577	3.46998	6.20828	6.85667	7.52763	6.70683	4.85549	8.02584	8.71706	5.64219	4.82861	5.38241	5.67243	7.40173	7.33414	8.79785	6.87707	5.92987
AKAP13	7.23476	6.72189	8.7548	7.32638	7.6033	6.23157	7.98234	6.70706	7.60038	6.57173	7.21405	7.25302	6.29837	6.71288	7.18099	7.28224	7.84228	6.62315	7.00577	8.02893	8.15993	8.01226	6.8859	6.5766	6.49925	7.74142	7.71175	6.38889	5.90029	5.68383	5.70554	6.31972	5.81231	5.61683	6.86993	5.46832	4.94827	5.22402	6.12716	7.20768	5.8607	5.74351	6.8038	5.37516	5.25677	6.39281	6.6218	5.52626	5.2051
AKAP14	6.72656	2.50288	2.45948	3.13101	2.49088	2.45571	2.58744	2.35466	2.48969	2.39839	2.40989	2.38435	2.43672	2.41276	2.38865	2.44834	2.46634	8.41658	2.30047	2.3535	2.43211	2.39019	3.3435	2.81962	6.61224	2.46859	2.3135	2.61881	2.74409	2.74594	2.95858	2.78363	2.72769	2.52543	2.53646	2.44443	2.64005	2.78997	2.40251	2.66704	2.57613	2.41747	2.36676	2.39535	2.68557	2.53511	2.24786	2.59488	2.53681
AKAP17A	7.63844	8.00814	7.57983	8.34537	8.22668	8.77595	8.92817	8.57284	9.09336	7.94731	8.5805	8.51973	8.90017	9.13496	8.02934	9.0278	8.52074	8.71233	8.00568	7.96444	8.33955	8.06419	8.09859	8.29121	8.31948	8.35231	8.69222	8.38029	8.84028	8.48947	8.35601	8.10706	8.27008	8.61777	7.91411	8.53917	7.99392	8.39793	8.03397	8.44416	7.96352	7.93152	7.88108	8.34301	8.42865	8.66087	8.51588	7.71284	7.67626
AKAP3	4.04815	4.07678	4.43359	4.13055	3.89397	4.30111	4.27826	3.86334	3.93876	4.23938	4.11757	4.39487	4.09579	4.03752	4.20382	3.8637	3.88943	4.17548	4.59265	4.29622	3.81938	3.85188	4.18654	4.01743	4.13087	4.67276	4.21337	4.46669	4.10518	3.85722	4.39112	3.90982	4.23573	4.17741	4.80341	3.73935	4.06257	4.56941	4.26198	3.71931	4.85936	4.00846	4.55552	3.90019	4.12818	4.15642	4.41792	3.91378	4.43302
AKAP4	3.82907	4.06991	4.34693	3.96092	3.84902	4.09699	4.20159	4.07163	4.07539	4.04019	3.99937	4.1686	3.91621	4.21983	3.93932	3.94943	3.76195	4.05663	3.97321	4.1239	4.00641	4.16556	4.03101	4.18866	3.71581	4.00848	4.19846	4.7969	4.89685	3.77737	4.06924	3.94014	3.97006	4.36239	4.04527	4.15126	3.95273	4.00586	3.8113	3.74285	3.83221	4.37496	4.07058	4.19023	4.15464	3.84183	3.99147	3.98783	4.06326
AKAP5	4.00043	5.10552	3.60563	3.80116	4.04517	4.21742	3.78947	5.39592	3.63017	4.23535	6.76225	3.48751	4.99959	3.7686	4.08776	3.40862	4.84439	3.82787	4.75643	3.83374	3.57	3.98039	3.8648	4.58218	3.82867	3.80121	3.73721	4.93621	4.57189	5.57936	3.21838	3.46272	4.10355	4.38858	3.50552	4.60468	5.79876	4.28281	3.70858	3.83055	4.55986	4.5116	3.94324	4.60476	4.15218	4.09292	3.8641	4.16954	6.94856
AKAP6	5.78318	5.29544	4.75173	4.78461	4.32677	4.39269	4.80429	5.9849	6.00339	5.04383	4.92805	4.17931	5.16786	5.02169	4.98808	4.57212	4.99341	3.70081	5.15037	4.7486	5.02799	4.09559	4.63346	4.13826	4.73286	5.11617	4.5068	5.03888	5.90697	5.578	4.52761	5.25823	6.04621	5.22611	5.73333	5.05749	6.46853	5.31069	5.26184	5.22626	6.08407	6.26987	5.63681	4.5695	5.59025	6.18011	4.55961	4.90805	6.78306
AKAP7	8.47601	9.47987	7.7995	8.47461	9.12389	10.4357	6.13016	7.0244	8.53688	9.17208	8.87148	7.57691	8.83861	8.31491	8.20406	8.30691	7.32935	6.39406	9.5475	7.83964	8.14099	9.35498	8.09502	8.16155	8.6088	6.41503	7.08475	7.48461	8.43342	9.55505	6.8435	9.53586	9.42182	8.12308	9.9134	8.66433	8.40143	7.99356	8.82295	7.46898	8.38458	7.78717	7.97943	6.48154	7.59417	9.38983	6.50815	7.91818	8.32461
AKAP8	6.73051	7.18004	7.22141	7.33969	7.2243	7.31243	7.3355	7.3457	7.22429	7.06989	7.72379	7.32172	7.95995	7.27335	6.77381	8.1631	7.29739	7.552	6.48892	7.08219	7.04069	7.39875	7.65464	7.30045	7.40781	6.84456	6.98347	7.03538	6.59408	7.00193	6.78531	6.95138	7.19025	7.07299	7.19459	6.80699	6.32534	6.99522	6.43333	6.97031	6.16501	6.88424	6.83886	7.89968	7.22065	6.91072	6.88282	7.16771	6.50406
AKAP8L	5.44692	5.47744	6.54878	5.21726	5.46399	6.28758	6.46393	5.33955	6.7658	5.48596	5.71625	5.8616	5.75782	5.31262	5.5546	5.90975	6.02519	5.29293	5.91357	5.13127	6.48052	5.11834	5.22474	5.26364	5.00729	5.64966	6.65326	6.44607	7.91261	6.43799	7.56422	6.96456	8.51866	7.02485	6.73842	6.63856	6.6527	6.99966	6.38604	7.43802	6.67045	7.714	6.81682	7.41407	6.7488	7.22361	6.02272	8.15788	7.41016
AKAP9	4.5004	6.24545	5.77209	4.56389	4.06741	4.34617	4.60054	6.10563	6.7202	4.24344	5.39953	6.04441	4.20268	7.14336	4.8099	5.34884	5.52594	5.56767	5.22683	4.73726	5.67464	5.97255	4.32527	4.76749	5.18814	5.7653	5.39811	6.2161	7.01012	7.32813	6.51002	6.43279	6.87233	6.32413	5.32679	6.73924	5.25799	6.09614	6.55406	7.14792	6.85005	7.09032	6.61064	7.96409	5.70463	5.35334	7.98407	6.73624	5.83145
AKD1	5.49165	5.48112	5.20711	5.38755	5.76135	5.17576	3.78818	6.35868	5.63152	5.50859	5.04017	4.57314	5.07021	5.0833	5.76238	3.977	3.94633	4.82072	5.26933	5.35962	4.71302	5.51459	4.61329	5.00331	6.67608	5.83212	4.88111	3.96073	4.67282	5.74526	4.27796	4.15941	5.50257	5.3283	5.5153	4.92377	4.89087	4.42437	4.74751	5.36934	5.81586	5.20666	5.53125	5.18404	6.0361	5.45062	3.4103	4.98366	6.10368
AKIP1	7.57818	6.5319	6.69675	7.75329	7.72703	7.63775	7.92835	7.67698	6.36043	7.92829	7.47374	7.50327	7.14116	7.35056	6.83977	6.84982	7.53863	7.39371	7.4821	7.6619	7.13361	7.54241	7.92073	7.60816	7.34303	7.80894	7.2621	8.3295	6.57851	6.22127	6.8401	6.81676	6.13679	7.10073	7.10052	7.36234	7.15249	6.89233	6.87649	7.33735	7.07794	6.86164	7.24497	8.12416	7.71557	7.21303	7.801	7.19027	6.51906
AKIRIN1	7.29409	6.06636	4.76323	7.0737	7.41844	6.97487	4.87295	7.24099	4.95465	7.34067	7.61371	7.23762	7.47843	7.98727	6.01856	6.75981	6.46747	6.79012	7.70566	6.99393	4.93579	6.73797	6.12533	6.75076	7.55091	6.67812	4.92989	5.66662	4.37338	5.58608	6.63848	6.32705	5.69515	7.15129	7.73074	6.33231	6.13135	6.47849	7.73039	8.1861	8.01091	7.29226	7.148	8.91242	8.25599	8.27313	6.8557	7.13372	6.83084
AKIRIN2	3.67479	3.14494	3.17195	3.40747	4.55104	3.66734	3.52059	4.40915	4.11204	3.60812	3.9358	3.83069	4.54253	4.12564	3.70589	3.6769	3.3583	4.13844	3.3979	3.75505	3.29051	4.07231	3.92141	4.20142	4.3404	3.49981	3.15685	3.61026	3.94092	3.8778	4.55626	4.10816	3.92368	6.21864	5.81289	4.94137	4.57507	3.99409	5.88228	6.18462	5.22765	5.57786	5.52526	6.46099	6.71962	6.34543	4.99917	4.28967	4.80431
AKIRIN2-AS1	3.10517	3.19039	3.05326	3.08034	2.97059	3.21922	3.15332	3.04625	3.18787	3.0116	3.1678	3.18005	3.03632	3.05694	3.02975	3.30295	3.35336	3.05224	2.99436	3.035	2.96059	3.18121	3.17404	3.02464	3.05326	3.1123	3.18796	3.65221	3.34361	3.4927	3.30499	3.20885	3.22369	3.05164	3.37055	3.14747	3.25681	3.03246	3.27398	3.29332	3.66333	3.07406	3.16095	3.82135	3.0371	3.40567	3.02311	3.12709	3.31827
AKNA	7.03886	6.19395	7.28409	7.22136	7.03073	7.3763	7.33079	6.42332	6.58192	6.79194	6.83356	6.69273	7.03229	7.43309	6.9221	6.56465	6.44907	7.06182	7.10527	7.73307	8.18707	6.03716	7.46307	6.26726	6.87358	6.84416	6.97425	7.69842	8.11361	6.44961	6.97284	7.61624	6.1326	5.93587	6.91946	6.92006	6.13955	7.39216	6.90171	6.59371	7.04879	5.53075	7.038	6.21563	6.76788	6.012	6.13392	6.23341	5.80765
AKNAD1	3.55896	3.5189	3.02502	3.29071	3.10671	8.32109	3.60066	6.66516	6.99387	5.05706	5.89482	4.58423	7.7094	7.13298	5.17908	3.42231	2.85029	3.73209	3.08549	3.45609	2.94459	3.19476	3.47552	4.04162	3.61801	3.78884	3.36928	9.10673	3.57752	3.35745	2.82751	3.80102	7.84976	3.08003	4.81537	3.00791	2.96672	2.89187	2.82233	2.83309	3.16699	8.46568	3.56413	3.62423	2.73647	7.42591	2.84442	2.95565	4.60586
AKR1A1	8.92817	8.75321	7.92375	9.08505	8.58059	8.95948	9.02263	8.60392	8.21645	9.13249	9.10839	9.89921	9.5407	9.64902	9.08996	9.36719	8.35433	8.8964	8.38672	8.90491	8.38358	9.25675	9.57883	9.16172	8.93054	8.73098	9.41604	8.50197	7.10375	8.83513	9.07004	8.53823	8.00221	8.81458	8.75357	8.35491	8.06889	8.99297	8.48046	8.52662	8.39895	8.66878	8.77264	9.35085	7.96163	8.2999	9.23265	8.35654	8.2238
AKR1B1	9.43106	10.5778	8.13531	9.47858	9.72643	9.68618	10.1085	8.22173	9.18946	9.83658	9.47849	10.3298	9.61184	12.9395	9.64851	9.37809	9.26082	9.12808	9.66181	9.52617	9.28522	9.39121	9.49564	10.0669	9.41109	10.3979	9.86314	9.52949	7.80317	9.78065	9.98464	10.2524	9.22778	9.82751	9.63295	10.2402	9.92962	10.365	9.87078	9.53107	9.82893	7.05061	9.60314	9.84209	10.227	9.01867	10.4123	9.92313	9.23829
AKR1B10	3.16846	3.14494	3.03206	3.55103	3.15179	3.136	8.14991	2.9864	3.16018	3.68437	3.45646	3.47109	3.31495	5.73513	3.93617	3.24934	3.408	3.16961	2.92165	3.32995	3.09153	3.40225	3.29506	3.35273	3.51117	5.04985	3.42137	3.51197	3.1786	3.06382	3.30935	2.87859	3.29589	3.35445	3.13877	3.78681	3.01554	3.08069	3.14935	3.10486	3.17826	2.86945	3.11448	3.20118	3.18158	3.21417	3.53017	3.3063	3.17497
AKR1C1	8.86258	9.52006	5.30986	9.29775	8.83255	4.85743	12.051	4.846	5.36752	5.53539	6.52252	7.00863	5.14377	4.86869	8.3961	5.25169	6.50734	6.00475	9.07666	8.86156	5.45398	5.52504	5.67498	6.30948	9.01318	7.22497	7.19789	5.57593	7.57122	8.00902	8.33233	7.9431	5.26208	6.49716	5.85299	6.69793	8.45141	6.8327	7.65547	5.50383	8.53973	5.56867	6.89518	4.86633	5.28767	5.14809	9.06233	6.10768	7.60074
AKR1C2	8.30989	9.63736	5.63519	8.94532	8.55572	4.87351	12.4455	4.8705	4.91111	5.57347	6.16606	7.11926	4.57265	4.89071	8.39698	5.37261	6.52504	6.33241	8.52454	8.83605	6.3729	5.36024	5.70818	6.39606	8.80027	6.88005	7.54207	5.12989	7.27256	8.05644	8.53148	7.38539	5.3075	6.69631	5.73564	6.92093	8.38653	6.93296	6.92833	5.95568	8.48345	5.46611	6.63694	5.38018	5.21925	4.86996	8.98614	5.95244	7.72211
AKR1C3	7.14563	8.77535	5.30979	9.13171	8.54363	3.77096	12.0933	4.05345	4.09418	6.37685	6.29579	7.84471	3.89412	4.57523	9.55933	3.99067	6.22962	7.18049	9.25051	9.63557	4.77967	5.01252	5.19342	6.55473	9.08937	8.60796	7.75851	3.73217	6.601	6.52068	7.07814	6.22673	3.84641	5.52594	5.83313	6.32283	7.57316	5.99261	6.07297	5.33368	8.92024	8.22948	6.15152	3.61994	3.83535	3.38481	7.51203	5.18764	5.8223
AKR1C4	2.76333	2.80444	3.01514	2.85398	2.7514	2.67788	2.90008	2.74977	2.59124	2.70684	2.73602	2.92983	2.58433	2.63196	2.6225	2.68013	2.89885	2.74702	2.7537	2.73714	2.92302	2.72052	2.7634	2.64502	2.89351	2.81238	2.72488	2.74815	3.43047	2.41376	2.85864	2.82709	2.74059	2.53398	2.77861	2.69326	2.76592	2.99211	2.68433	2.68723	2.73619	2.8041	2.96815	2.53932	2.62044	2.88052	2.77215	2.54491	3.00961
AKR1D1	2.64113	2.64828	2.68789	2.67104	2.74385	2.6358	2.93829	2.82326	2.67939	2.6122	2.82345	2.69816	2.71346	2.68258	2.54915	2.69741	2.83004	2.76902	2.6157	2.67262	2.6836	2.57651	2.68936	2.81484	2.60063	2.6051	2.52847	3.0369	2.78258	2.94054	2.73642	2.64424	3.08101	2.43178	2.65494	2.59681	2.55282	2.95076	2.92726	2.40502	2.69429	2.51197	2.41983	2.55477	2.59129	2.66946	2.64047	2.64575	2.64393
AKR1E2	4.16479	4.2064	4.17047	4.39043	4.34866	4.53015	4.12927	3.95551	3.94103	4.11789	4.33815	4.29686	4.40277	4.14057	4.28298	3.66107	3.78821	4.29325	4.46172	4.56412	4.17506	4.47019	4.1269	4.45369	4.50087	4.41426	4.66824	4.80236	5.14649	4.27484	4.3943	4.57332	4.15355	4.29647	3.92608	3.94948	4.407	4.47019	3.87538	3.84405	4.05477	3.86706	4.51356	5.69913	4.40759	3.82568	4.79014	4.00186	4.6813
AKR7A2	8.08444	8.02784	6.62137	8.51558	8.10886	7.90872	8.20021	8.44914	8.05043	8.11163	8.54396	9.28187	8.52258	8.67918	7.18519	8.15822	8.65413	8.85613	8.30325	7.85468	7.92582	8.89588	8.34084	8.93453	9.32326	8.83507	7.99754	8.34594	5.76259	7.29831	8.60925	8.18197	7.85487	8.1846	8.90721	7.869	7.77008	8.24194	8.40587	8.58421	8.90053	8.02684	7.90799	9.0386	8.14447	8.4043	8.65895	7.51459	7.91878
AKR7A3	6.30275	6.17103	5.99535	6.38678	6.18945	6.13498	6.64234	6.39447	6.24301	6.19213	6.40059	7.11592	6.47077	6.71529	5.57782	6.20271	6.40312	6.47048	6.14944	5.85898	5.97832	6.66276	6.21482	6.8341	7.28206	6.55616	6.19474	6.6588	5.86341	5.65245	6.50392	6.26978	6.59004	6.05464	6.43266	5.95733	5.98663	5.91987	6.04149	6.27285	6.70732	5.99789	6.17858	6.58339	6.0631	6.59883	6.53574	5.69488	6.4397
AKT1	6.25651	7.09585	7.9978	6.42896	6.65612	7.84697	7.94042	6.14464	7.60838	7.50406	7.42234	7.17069	7.4425	7.16342	6.88528	7.51459	7.19126	6.4503	6.96283	6.93703	7.4176	6.92623	7.01878	7.18504	6.98293	7.05041	6.97688	8.45401	8.57019	7.8372	7.89338	7.98848	8.46395	7.56301	7.7461	7.13889	7.40079	7.97395	8.09175	8.02825	7.73989	10.7779	8.01378	7.35427	8.21349	6.65012	7.94264	7.8499	7.15953
AKT1S1	5.38543	6.58944	6.15306	5.47321	5.82387	6.08191	6.45183	4.75024	5.43157	5.99021	6.20342	5.38665	5.73265	5.62524	4.95856	5.25705	6.02133	4.90538	5.73294	5.86533	5.54429	5.26839	5.56395	5.82407	5.57941	5.42798	5.64587	5.35379	5.92626	5.75103	7.36844	6.55446	5.78295	8.53173	6.58883	7.87026	6.79613	6.84282	7.06656	6.6556	7.35071	6.45227	6.91361	7.0245	7.70712	6.0705	7.76273	6.44901	6.07719
AKT2	4.58232	5.4579	6.95866	4.80576	5.11505	5.70447	5.43882	5.38204	5.71981	4.86213	4.93081	5.53588	5.13922	4.62695	5.09158	6.00446	6.60465	5.07405	5.71048	4.98428	7.13902	4.48778	4.93556	5.04687	4.67708	4.85106	5.3624	5.73803	7.98135	6.54664	8.00538	6.90916	6.80109	7.55012	6.81553	6.59925	6.8406	6.68776	6.7826	7.26469	6.79418	6.96318	5.89878	7.19759	6.32273	6.90518	6.03781	7.31752	6.60284
AKT3	5.23418	6.89136	6.21417	4.44568	4.85176	6.31459	5.61458	6.81677	7.20102	5.58768	5.79766	6.20858	5.43983	5.29048	6.79268	6.27482	6.68456	5.53082	5.97914	5.82826	6.80946	6.05128	5.47648	5.71093	6.84583	5.00157	6.1695	6.81664	5.12921	7.63653	7.2999	6.23462	7.79487	6.92593	7.0854	6.2143	6.33886	6.1273	6.47846	7.27664	6.54054	8.09076	6.20773	7.16255	5.79886	7.12927	5.47771	7.4457	7.41542
AKTIP	8.91688	7.83229	5.50452	8.12189	7.22026	5.97893	6.05078	8.38007	7.26726	7.95513	7.69442	7.59065	7.92508	8.04471	8.45802	6.69794	7.18108	8.10003	8.10696	7.64201	7.17423	7.6734	7.69111	7.65316	8.51098	6.67194	7.22784	4.90255	6.09666	6.91014	5.97915	5.71744	5.80978	6.86069	7.23961	6.65644	7.87151	5.95318	7.55819	7.09187	8.21132	7.07288	6.8469	6.80546	7.36627	7.35332	6.05936	6.25307	8.12733
ALAD	8.32881	6.68029	7.89349	8.41062	8.16235	7.25687	7.36222	8.30103	7.2326	8.59467	7.31873	8.46455	7.69149	7.81655	8.34088	6.52936	7.91437	7.31574	8.62799	7.97273	7.52945	7.16735	8.42062	7.56554	6.8325	8.63664	8.89415	6.51139	7.38196	7.14032	7.35795	8.64944	6.18782	7.74597	7.09334	7.40711	7.53915	7.90353	8.33717	7.14703	9.14261	7.07358	8.26368	7.74081	6.79015	7.41502	7.05197	7.10829	7.97075
ALAS1	7.5503	8.25217	5.79513	7.63719	7.40762	8.18279	8.54961	7.31918	7.30046	8.19693	7.9069	8.04596	8.10248	7.52426	7.43833	7.139	7.31891	6.93175	7.2304	7.15653	6.54649	7.63488	8.11309	7.78667	7.89851	8.08591	6.91308	7.61043	5.58254	8.1299	6.5441	7.03979	7.06657	7.45656	8.05432	7.73996	8.1558	7.56395	7.90352	7.53092	7.81149	7.35107	7.75142	7.54094	7.99823	7.86872	8.02733	7.67619	7.79494
ALAS2	5.26306	4.58604	4.64372	4.86582	4.45349	4.50404	4.57218	4.55996	5.04672	4.30542	4.36753	4.68359	4.84694	4.891	4.60048	5.40424	4.91768	4.57215	5.10293	5.40423	4.69554	4.55796	4.59117	5.34898	4.57413	4.88778	7.26693	4.95765	4.23473	4.18574	5.13181	4.71253	4.49683	4.32289	4.33661	4.58925	4.44472	4.46505	4.59659	3.98969	4.49284	4.48646	4.25635	4.20145	4.47847	4.33402	4.61228	4.42285	4.49061
ALB	2.99512	2.76615	2.85596	2.84899	2.64655	2.81155	2.94144	2.69801	3.31863	2.9785	2.78636	2.77232	2.68655	2.85242	2.57262	2.91825	2.86428	3.678	2.77049	3.32929	2.62242	2.85406	2.66366	2.78482	2.74965	2.84329	2.71653	2.92284	2.98798	2.5237	3.84195	2.94376	3.39339	2.66377	2.9141	2.68417	2.89393	2.75936	3.0458	2.75327	2.94334	2.58162	2.58874	2.71452	3.86013	2.97096	2.77717	2.80247	3.08266
ALCAM	9.88154	9.65559	9.4067	9.87376	11.0154	8.82551	9.87755	7.61002	6.94412	11.5051	9.82153	10.0024	10.5524	9.42387	10.5051	8.38664	10.5655	8.7039	11.3997	10.9798	11.0904	9.26687	11.7675	9.14123	7.26294	11.2805	10.0903	9.61451	9.91867	10.5571	9.5339	9.77499	5.82767	10.7488	10.9095	11.2613	10.6056	11.1709	10.5391	7.73124	10.9335	6.40153	10.4422	8.63636	10.183	4.40471	9.32419	10.9313	9.46293
ALDH16A1	5.8168	6.17598	5.92067	5.72165	5.75083	5.91382	6.5548	5.37695	5.91052	6.05136	5.56363	5.86765	5.83125	5.67018	5.57271	5.79983	6.02691	5.38624	5.60549	6.006	6.05709	5.86499	5.89265	6.24804	5.97599	5.95027	6.49285	6.44871	5.87415	5.09811	6.75714	6.14626	6.57948	7.21488	5.52822	6.81587	5.89947	6.87719	5.96874	5.97838	6.11137	6.00504	6.50948	6.72092	6.05316	5.79096	7.02148	6.59804	5.40448
ALDH18A1	7.06061	8.16269	6.37285	7.74929	8.22597	7.68557	7.07261	7.87456	7.09723	8.53714	8.68131	7.98496	8.18517	8.46009	7.52291	8.82154	7.39034	8.22037	7.30848	7.50237	7.38348	8.39272	9.68443	8.61748	8.11031	7.08447	7.42165	6.42476	6.89142	6.98106	6.92665	7.92369	7.21669	8.17731	7.75218	8.74345	6.96293	7.75634	7.65597	7.80325	7.16242	8.00218	7.64578	8.22497	9.14874	8.09427	7.82734	7.85323	6.61652
ALDH1A1	5.65487	3.58653	5.36167	4.50825	4.50433	4.56395	12.0467	9.09742	3.90461	5.17043	4.30404	5.49162	4.09409	4.01812	5.76331	4.04604	5.77563	3.66818	4.46974	5.94711	3.99464	3.84474	5.06404	6.76293	6.03365	4.09186	7.10941	4.00224	4.08438	3.94621	7.42761	3.86064	4.24736	5.04361	3.9511	4.9769	8.27107	6.06838	5.00178	3.87023	9.09862	3.83975	6.95691	9.69179	4.55539	3.84017	3.89513	7.02737	8.18174
ALDH1A2	4.70474	3.93096	4.87403	4.8608	4.20269	4.15383	4.87241	3.77848	5.41344	4.84983	3.9598	4.30416	3.89685	4.12169	4.00828	4.40041	4.26516	3.6804	4.11456	5.3293	4.80765	3.93812	4.08986	4.37319	4.93567	4.17921	6.58057	3.65853	5.74199	4.48378	4.78423	4.34617	4.25427	3.75131	3.8887	3.71725	5.38213	3.91179	4.33087	4.17201	4.35836	3.80074	4.88217	3.30053	3.84853	3.71429	3.92959	5.04266	4.09944
ALDH1A3	7.65161	4.33837	6.89227	6.9426	7.53845	4.44054	4.24356	6.80123	4.41148	4.41365	4.19154	6.67771	4.83836	4.26689	4.16496	3.99453	10.4803	4.66172	9.59988	9.20385	10.4662	4.46105	6.24912	5.93325	5.19157	10.0435	6.96142	4.11936	8.541	8.98303	7.70825	3.9208	4.37606	6.38829	4.09916	5.58605	6.30698	4.94347	7.15945	11.1682	6.60181	3.91355	6.25023	3.86236	4.07739	3.79625	7.77979	5.04491	4.15857
ALDH1B1	5.18653	5.5824	5.47392	5.41674	5.28346	5.94608	5.58082	4.9566	5.13177	5.89212	5.58621	5.45637	5.37831	5.45555	5.47702	5.53877	4.92333	5.23699	5.32954	5.47857	5.24384	5.4747	5.9936	5.69934	4.92427	6.64418	5.1879	5.28375	5.07152	4.81926	4.81665	4.97988	4.37394	5.4216	4.67541	5.27892	4.9635	5.19057	4.52128	5.15556	5.15001	4.87081	4.98663	5.1873	5.90567	4.9526	5.95884	6.12424	4.92285
ALDH1L1	7.00479	6.23307	7.58705	7.02716	7.0225	7.25666	6.26108	5.35147	7.22482	6.74154	5.74734	8.8814	7.24604	5.75558	8.35303	7.46936	6.64197	8.40699	8.6292	7.83612	7.66753	6.14093	5.93891	6.28197	6.57085	5.32432	7.09015	6.76075	6.33238	6.39079	9.02607	6.89502	6.78894	7.14818	7.2393	6.28021	7.99111	7.10638	8.71392	6.10225	8.37303	5.22285	7.16445	5.53844	6.30264	5.92125	6.50196	7.29106	7.60699
ALDH1L1-AS2	5.13396	5.05868	5.6937	5.2818	5.65641	4.62942	5.11463	4.70974	5.17889	4.89979	4.95787	5.79375	4.83311	4.70862	4.988	5.61899	4.99684	5.55566	6.28635	5.53459	5.18821	5.1566	4.87904	5.3631	5.01078	4.74752	4.89111	3.97394	5.19897	5.0491	5.62215	4.80012	5.08017	4.59553	4.78639	4.49451	5.11994	4.84449	5.63219	4.4996	5.17991	4.42797	4.48994	4.28118	5.27208	4.72741	4.59771	4.75897	5.18821
ALDH1L2	8.37823	6.84647	5.34499	6.62001	7.33143	6.26401	4.19534	6.20819	5.70558	4.92308	7.33145	6.02943	5.85814	6.5079	6.69062	5.15167	3.62523	4.59623	6.99553	6.97109	6.5418	7.17719	8.73258	6.00563	4.87383	5.55053	5.33398	6.13873	5.46122	7.31801	4.95996	5.8327	5.11877	5.5057	5.88976	6.80216	5.47409	6.67793	6.96655	5.37635	5.85689	3.43151	6.23456	4.65888	5.28752	5.69955	5.88511	6.37089	4.51867
ALDH2	10.1058	9.01842	8.76162	9.55508	9.4233	8.35599	9.02429	8.73277	9.15097	8.67942	8.66758	9.87093	8.20787	8.39566	9.76569	7.64507	8.15871	8.61724	10.286	9.44525	8.72575	8.63107	8.11726	8.35323	10.1182	6.90166	8.88227	8.32613	8.19747	8.64712	8.81753	8.62441	8.24426	7.78847	8.66204	8.45318	9.94314	9.13327	9.6234	8.90111	10.2901	7.3252	8.26959	6.88012	7.60347	9.16878	8.1083	7.98303	10.3389
ALDH3A1	3.81469	4.26839	4.28044	4.27356	3.99941	4.2628	5.09426	4.20916	4.26139	4.03777	4.17975	4.36932	3.93828	4.06046	3.93036	4.53913	4.12009	3.96945	4.15431	4.27482	4.24095	4.42245	4.21878	4.21961	4.14525	4.32468	4.33373	5.28992	5.06377	3.69781	4.76001	5.14141	4.97961	4.53329	4.19462	4.45307	4.7023	4.88599	4.28438	4.44097	4.59864	4.42791	4.75385	4.67298	4.76411	4.15756	4.91143	4.71271	4.67202
ALDH3A2	10.5598	9.81463	9.12656	8.69636	9.55048	9.0543	9.28244	9.04459	10.1266	9.41307	9.63824	9.8485	9.43192	9.30281	9.69975	8.31139	8.48916	9.13364	9.5086	9.08298	8.74738	9.03796	8.80038	9.08284	9.30248	8.53069	8.7988	7.91532	6.98097	8.1742	7.9304	8.22657	7.50534	7.60657	8.15157	7.49664	7.44166	7.30341	7.86305	7.66982	8.105	8.29542	7.42448	7.76551	8.74874	8.81285	7.32056	7.32633	7.16155
ALDH3B1	5.22865	5.18622	6.2014	5.34745	5.19669	5.31599	7.7421	5.11992	4.91958	6.42848	5.65793	5.58767	4.99232	5.15716	5.18069	5.57458	5.14706	5.10457	5.42851	5.93643	5.44936	5.15006	5.66785	5.52103	5.82497	7.44262	6.12199	5.27455	5.92864	4.3172	6.55994	5.73435	4.91836	5.0854	5.50142	5.21133	5.39529	5.40645	5.10591	5.12965	5.33979	4.79854	5.58336	4.78802	5.42965	5.00326	5.85769	4.84278	5.31375
ALDH3B2	2.73023	2.68636	2.81793	2.85181	2.5433	2.66918	2.94336	2.68061	2.81484	2.59819	2.61055	2.64893	2.78517	2.79104	2.71854	2.74267	2.46124	2.59617	2.54975	2.57239	2.81225	2.79534	2.7102	3.01536	2.61663	2.78517	2.95498	3.40119	3.32719	2.6077	2.84202	2.97145	2.84978	2.80723	2.58521	2.56874	2.8292	2.98095	2.78794	2.55779	2.71708	2.85363	2.78623	2.80539	2.9575	3.0771	3.27346	2.73675	3.03173
ALDH4A1	7.20414	6.09958	6.40399	6.40859	6.15321	6.16164	5.78708	6.46129	7.09786	7.71198	6.31116	6.66899	6.60829	6.47411	7.11463	5.91673	6.35651	5.98637	7.46239	6.92896	7.17316	5.86332	6.55107	5.7324	6.41943	4.88006	7.22018	6.19038	5.60642	6.3212	6.55045	7.31011	7.31102	7.04425	7.09977	6.67969	7.1652	7.08008	8.37997	5.76502	8.54332	6.14063	6.82885	6.51332	7.06974	7.58784	5.27703	6.21746	7.34002
ALDH5A1	9.43211	9.92436	8.43609	8.90203	9.05893	7.67083	6.17127	8.13319	9.17512	8.66606	8.15813	8.40215	8.41875	8.09148	8.6445	6.22036	7.7298	9.05135	9.74654	8.75091	9.60094	9.06893	8.17776	9.37101	10.81	4.35489	7.71245	4.82542	9.34042	9.88187	7.61043	8.05461	6.98121	8.98234	8.23403	9.16067	9.37714	8.59541	9.30189	7.09046	9.49832	6.62213	8.38249	5.41974	8.57969	8.48892	3.15757	8.54207	9.75718
ALDH6A1	6.83279	4.51115	6.88462	5.82421	6.44319	6.82797	3.60066	6.74193	6.80697	6.79177	5.47082	6.86572	7.29318	5.2983	7.96854	4.2534	5.2907	6.56145	8.85207	7.21342	6.20487	7.0145	5.34773	7.15286	5.98587	5.69854	5.72856	4.14548	6.48836	5.28014	5.41682	5.71639	6.24585	6.06969	6.4103	4.96551	6.98026	6.03958	7.92461	6.24528	8.29792	5.17877	6.01557	4.37863	6.72687	6.60044	4.96583	5.4851	8.03469
ALDH7A1	7.93886	5.50402	5.93824	6.74712	6.51497	5.81316	6.97191	5.05671	7.02921	6.01177	5.72171	6.09834	5.60789	5.99345	8.03512	5.06119	6.70795	6.47953	7.4192	6.20875	6.30337	7.21487	5.47126	6.59426	7.46147	5.80881	5.88306	4.88421	5.65087	6.55317	5.24607	5.46956	5.58737	6.87823	5.51224	5.91608	6.22072	6.40042	6.54376	5.48194	7.26963	6.19859	5.55998	6.15827	6.05877	7.58573	3.8641	6.09755	6.99684
ALDH8A1	3.39505	4.34946	4.17428	3.03915	4.66524	5.47453	5.48444	5.12016	5.59969	3.99354	3.75611	2.76542	3.75471	2.77287	3.00345	2.64446	4.5478	3.4134	3.54034	3.11154	4.28534	4.2441	2.96512	3.884	2.86186	2.62204	5.61445	3.3296	4.77168	4.6444	3.32969	4.84847	3.74877	3.97809	3.75826	2.92369	4.41211	3.49429	4.93303	4.54016	5.89074	3.63648	4.69025	5.482	4.09627	4.05407	4.12299	4.35813	5.48726
ALDH9A1	11.1857	10.5703	11.0817	10.876	10.4517	9.99763	10.2399	10.4054	10.3337	9.70213	10.8853	10.8592	10.9311	10.5634	11.3737	10.8411	10.335	11.2903	11.331	10.8477	10.6169	10.8792	10.4654	11.6757	11.1322	9.85435	10.7149	10.6658	10.0934	10.7464	10.4815	9.63821	10.7195	10.9262	10.3339	10.4195	10.1909	10.0504	10.307	9.37785	10.6547	9.73796	10.3118	10.4231	10.2706	10.2693	9.49342	9.84122	10.6308
ALDOA	8.18108	7.82134	8.64752	8.30489	7.80575	8.08676	9.4477	7.60128	7.01668	9.12755	8.9285	8.14161	8.05936	7.56182	8.21425	8.34249	8.16102	9.34401	7.87718	8.53005	7.66496	7.1899	8.87065	7.71985	8.70288	9.45779	8.02034	8.39201	7.51808	7.31165	8.72609	8.26193	7.93972	7.83197	9.25023	8.10622	8.30306	8.12352	8.28991	7.20988	8.29488	8.47108	8.46765	8.55442	9.45319	8.19949	9.88617	8.01622	8.58561
ALDOAP2	3.46077	3.62298	3.77655	3.5064	3.38192	3.45706	3.72686	3.62054	3.61566	3.55429	3.55297	3.39205	3.51063	3.39934	3.49295	3.45811	3.39329	3.63998	3.44333	3.56089	3.58628	3.6067	3.57638	3.42489	3.53818	3.44375	3.91498	3.41863	4.56839	3.4663	3.31404	3.86965	3.76572	3.17537	3.68389	3.83697	3.71767	3.67444	3.68985	3.493	3.61627	3.55664	3.58519	3.46528	3.82683	3.60882	3.79659	3.60293	4.16329
ALDOB	4.03342	4.54859	4.80529	4.54343	4.26179	4.75655	4.92326	4.47194	4.43659	4.48248	4.36945	4.32613	4.26716	4.43067	4.12126	5.1897	4.99801	4.3176	4.13956	4.51121	4.65519	4.51053	4.66856	4.58457	4.53924	4.62823	4.83511	4.78833	4.64842	4.19036	4.45927	4.64785	4.94258	4.20215	4.45799	4.29083	4.37108	4.51312	4.39659	4.05918	4.3585	3.98262	4.00339	3.91249	4.38269	4.2223	4.78382	4.45837	4.53562
ALDOC	8.72575	7.91041	8.86538	9.48645	8.78514	8.59931	7.11318	9.34336	7.1696	9.4452	9.48956	9.59189	9.61303	6.9621	10.4305	6.10798	8.24427	7.14823	11.164	9.47148	9.08394	5.71144	7.37971	8.54365	7.66093	6.91496	8.51319	7.67994	7.60303	9.27143	8.72651	8.34942	8.73649	9.9295	10.0411	8.09781	11.123	9.03486	11.3764	6.88941	11.3605	7.95968	7.44175	7.08367	8.97618	9.53293	7.78934	9.04527	11.1745
ALG1	4.61773	4.5387	4.90543	4.54768	4.42349	5.33666	5.24424	4.44103	4.89505	3.63643	4.60636	4.71573	5.43889	4.89291	4.37697	4.03999	4.30448	5.14024	4.80238	4.53811	4.33891	4.95697	4.97525	5.1023	5.05091	5.0644	4.35446	4.7964	5.63968	4.07462	4.55105	4.04945	6.08195	4.38758	4.96771	4.61382	4.47782	4.55317	4.04238	4.816	4.58391	4.08506	4.55207	4.67017	4.62694	3.9583	4.11496	4.51978	4.1643
ALG10	4.47195	3.48769	3.10811	3.95382	4.23274	4.67299	3.66288	4.65343	3.57986	4.17167	4.10999	3.58016	5.04846	4.06512	4.05821	3.43499	4.35485	4.42569	3.85204	3.62654	3.12355	4.22271	4.129	5.33165	4.12934	4.01902	3.30999	3.51093	3.2893	3.41378	3.46749	3.79066	3.30399	3.35743	3.80747	3.88384	2.93174	3.28571	3.37801	3.42345	3.10889	3.90663	3.41285	3.07036	3.65904	3.92822	4.74543	3.5288	3.30452
ALG10B	8.02707	6.89979	3.23109	6.12099	6.71573	6.41132	4.98764	7.29266	6.13403	6.38061	5.14981	4.75283	7.45168	7.02899	6.78424	3.8801	6.74052	6.41168	6.58374	5.8359	4.76399	7.29019	6.15667	7.34305	6.39416	6.00837	4.75642	3.62967	4.25436	6.24734	4.76698	5.75073	4.76408	5.6641	5.63726	5.80088	5.30122	5.38915	6.00344	6.07542	5.97557	6.41887	5.41783	5.98664	6.42361	6.70769	5.24337	5.5253	5.35592
ALG12	5.63607	5.66413	6.08724	5.28488	5.25212	5.36811	5.82163	5.4637	5.44757	5.31262	5.24745	5.36883	5.05944	4.97804	5.32954	5.64407	5.47022	5.46081	5.36197	5.51182	5.50445	5.35977	5.35389	5.27675	5.36312	5.50676	5.64587	6.45696	6.6287	5.67718	6.67407	6.56688	6.57496	6.37707	5.78893	6.64086	6.4669	6.55114	6.14111	6.10354	6.16211	6.19405	6.7953	6.15716	6.24934	6.1068	6.44682	5.97874	5.89215
ALG13	7.46729	5.63149	4.77891	7.33042	6.70978	6.14951	4.78784	6.75147	6.35157	6.34997	6.98823	7.27247	7.03047	7.65813	6.91313	5.75327	6.4012	6.92184	5.99768	5.67735	4.34617	6.84389	7.41654	6.99261	5.45014	6.64147	5.29068	6.24801	4.63431	6.0742	4.66906	5.5372	4.72993	5.72523	5.06368	5.84974	6.14878	4.59025	5.41547	6.14128	5.96904	6.12477	5.47855	5.68441	6.18019	5.89781	8.15239	4.91807	5.30924
ALG14	7.77833	6.47582	4.91464	7.34529	7.74559	7.48594	6.55585	7.19395	6.71218	7.69016	7.1249	7.89442	7.63722	7.97018	7.80163	6.34587	7.21865	8.20296	7.17537	7.27217	5.90789	7.88906	7.69445	7.62271	6.8742	6.85454	6.86132	6.32402	5.38367	6.21971	6.74565	6.14587	6.67836	6.30448	6.37251	6.07947	6.14706	6.88321	6.85106	7.17465	7.33052	6.12359	6.83259	6.95981	7.69147	6.50919	6.79137	5.66066	6.36018
ALG2	8.35417	6.88867	7.67504	9.21139	7.81911	8.55926	9.16138	9.53232	8.15638	9.35128	8.79304	9.29556	9.0355	9.64874	8.02624	8.06988	8.28569	9.14634	8.65341	8.74795	7.88966	8.35617	9.69843	8.91022	8.35124	10.265	8.26642	7.02059	7.93206	7.73543	8.29368	8.42103	7.56575	7.69504	8.26012	8.13866	7.37721	8.05905	8.06239	8.10176	7.61155	7.73489	8.67424	8.90872	8.18095	8.11936	8.48034	7.29629	7.16921
ALG3	5.92426	6.64217	6.51024	6.24771	6.3369	6.42422	6.45417	6.1786	5.9776	6.27114	6.40563	6.58632	6.25881	6.28645	6.05155	7.04068	6.38318	6.09008	6.23705	6.44393	6.31432	6.42571	6.58784	6.57465	6.34903	6.73396	6.33393	7.11395	6.57169	6.47799	6.82116	7.0786	6.76749	7.35329	6.81958	7.59552	6.89543	7.40747	6.74453	6.72132	6.39154	6.13517	6.97657	6.31628	7.34369	6.55157	8.17552	6.61588	6.15708
ALG5	8.12834	8.1723	8.10229	8.78559	8.91418	8.77704	8.63297	8.1057	8.30416	9.44892	8.3592	8.57349	9.00674	10.3574	8.52145	8.57606	9.21006	9.41401	8.70457	9.22342	8.84378	9.23963	8.97109	9.63844	8.57218	9.19463	8.72114	7.98438	7.8905	8.38773	9.33763	8.08514	8.17464	9.42546	8.75435	8.48	8.24888	8.9033	8.85331	9.32773	8.77532	8.20342	8.72888	8.13781	9.19327	7.70309	9.14257	7.87894	7.61597
ALG6	7.72563	7.61447	6.18488	7.32081	7.69961	8.16255	7.33363	7.53316	7.33914	8.0371	8.10608	7.77854	8.31105	8.43803	7.94439	7.80565	7.73229	7.49101	7.99234	7.26804	7.40935	7.86825	9.33089	8.1488	7.71798	7.0562	7.21927	7.69299	4.57663	7.61248	7.31113	6.47806	7.43538	7.92642	8.05596	7.18017	7.26312	7.02074	7.20134	7.79749	7.31522	7.10197	7.70314	8.28571	8.23617	7.1186	7.78735	6.44058	6.89024
ALG8	8.22398	7.262	6.99144	8.07729	7.86422	8.8587	8.2331	7.54054	7.96921	8.56833	8.35323	8.30994	7.66849	8.07353	7.63354	7.65614	8.20176	8.01232	7.75756	7.99128	7.66044	8.44855	8.20131	8.54081	8.35746	8.75787	7.63165	7.66778	7.54204	8.22393	7.78588	7.83841	7.67812	8.76452	8.23705	9.08815	7.65128	8.07887	7.5777	7.58271	7.42654	7.35104	7.63871	7.97532	8.58752	7.37173	8.95456	8.70638	6.97123
ALG9	6.65448	6.86722	5.65507	6.57249	7.18873	7.31441	5.83416	7.68677	7.69593	6.93232	6.58771	6.79634	6.76359	6.42178	7.32141	6.7105	5.91426	7.45545	6.16599	6.65667	6.34599	7.26129	5.61758	6.79346	7.48835	6.31105	6.13422	6.22519	6.03975	7.35189	5.83266	7.01071	7.32627	6.57834	6.83007	6.97354	6.85876	7.08672	7.0229	6.79145	6.24349	7.18558	6.75458	7.08695	6.79177	6.87308	6.14328	6.48959	6.43774
ALK	4.9654	5.21814	6.6002	6.0022	5.81221	5.0226	5.29508	5.24414	4.95687	5.81269	7.4347	6.21719	5.76172	5.1266	5.45658	5.69624	8.35982	5.36556	6.17822	5.4919	6.32959	5.03385	4.97088	5.4119	5.47014	6.59699	5.43869	5.86787	6.61584	5.38737	8.23058	7.96938	5.10014	5.41569	5.22842	4.49818	5.67947	5.33725	5.78326	6.36342	6.29248	4.96693	5.8934	9.07152	6.42829	4.81172	5.27341	4.83278	5.51609
ALKBH1	6.883	6.76795	6.06435	6.7916	6.1066	7.41204	7.04259	6.72375	7.32614	7.16085	7.50555	6.85481	7.62366	6.99699	6.90148	7.3391	6.64991	7.11105	7.53602	7.41118	6.47811	7.70068	6.66633	7.28647	6.7365	7.38474	6.78371	6.65773	5.65758	7.30987	6.77195	6.60583	6.91627	7.4149	6.4938	6.82889	6.96663	7.05837	7.17397	7.02365	7.07543	6.90373	7.47611	7.09746	7.47398	6.99646	7.89246	6.86475	6.83984
ALKBH2	7.16495	7.94298	6.80597	6.86334	7.13416	8.3077	6.69118	7.27194	7.08516	7.15215	7.65456	6.93773	6.81004	7.58659	6.93051	8.16649	7.22683	7.29697	6.36087	6.53691	6.77044	8.3289	8.09701	7.88562	7.04815	6.36824	6.91994	6.77542	7.68077	7.12959	6.43558	6.07435	7.03848	8.27937	6.90744	8.13281	6.77027	7.25884	6.27231	5.95843	6.297	6.96175	6.66313	6.39034	7.22716	7.30291	6.83063	6.87707	6.47379
ALKBH3	6.71126	6.61689	6.44042	6.88067	6.71811	7.10563	7.19104	7.20957	7.5022	6.99921	7.4808	7.67552	6.95806	8.0489	6.33144	7.01895	6.63592	7.04231	6.76962	6.96052	6.31133	7.14299	7.21532	6.91844	6.69799	7.67744	6.89005	8.28661	6.33281	7.32291	6.78566	6.88462	7.07904	6.61788	7.09805	6.6558	6.67236	7.23911	6.43333	6.72844	6.58339	6.86131	6.93268	7.82705	6.98632	7.27913	7.35731	6.42799	6.45134
ALKBH4	5.7217	6.02537	5.54802	5.39369	5.93013	5.92627	5.40849	6.01393	5.72358	5.82705	5.72379	6.04164	6.18263	5.84523	5.60287	5.71837	5.45418	5.57846	6.13796	6.10268	5.17779	5.95505	5.81475	6.09684	5.74681	6.04178	5.17621	6.03551	6.06159	5.46465	5.686	6.42923	6.47085	6.22065	6.01712	6.01289	5.50772	6.0137	5.70158	5.78899	5.642	5.89556	5.89478	6.08176	6.0291	6.16727	6.00005	5.76632	5.53421
ALKBH5	7.50211	7.82226	6.09556	6.91253	7.70526	6.62381	7.60339	6.80373	7.77632	8.01017	8.62217	7.35945	7.49758	7.2867	7.35187	7.01478	6.92678	8.10477	7.21018	7.67135	6.88594	7.53341	8.01713	7.38079	7.62576	7.78281	6.99813	6.15525	4.84036	5.65129	5.85638	6.38405	6.59386	6.30743	7.13126	6.38179	6.32957	6.68583	6.51616	6.57423	7.11536	6.20395	6.59862	7.00364	7.44975	7.04281	6.95851	6.83945	6.7338
ALKBH6	6.93704	7.01173	7.0097	6.73766	6.56556	7.09676	7.72631	6.58689	6.67465	7.46843	6.99515	7.10628	6.99217	6.58624	6.61598	6.23483	7.0667	6.61455	6.93392	7.02461	7.11005	6.48995	6.35941	6.98104	6.98474	6.93323	7.2953	7.96366	7.53045	6.89606	7.41987	6.99924	7.0426	7.09958	6.909	6.91365	7.1216	7.44293	6.6707	6.90953	7.08652	7.11645	6.9415	7.69891	7.56583	6.7496	8.01885	7.12628	7.24122
ALKBH7	7.96525	7.14879	6.06513	7.92999	8.58675	7.84138	7.527	8.0695	7.86311	8.38531	7.85348	8.67713	8.48094	7.50861	7.8	6.86479	8.46355	8.46367	7.24997	7.76815	7.62103	8.39924	9.03779	8.62577	8.94679	7.75956	7.77974	6.86391	5.21492	6.9239	8.55475	7.85867	6.93383	7.64334	8.14721	7.28974	7.99245	8.22309	8.17049	8.38261	8.6748	8.02497	8.25142	8.94313	8.56679	8.58329	8.19512	7.94196	7.96134
ALKBH8	6.41752	5.87134	5.37555	6.06815	5.54675	5.63014	5.45253	5.45473	5.5057	6.84567	6.21554	5.94195	5.70816	6.50932	6.86192	4.57942	5.44098	6.07632	6.45487	5.97936	5.90801	6.86816	5.72816	6.80896	6.06621	6.89487	5.16867	4.93197	5.10961	5.73097	4.75787	5.42604	5.49281	5.75649	5.67682	5.67337	4.72154	5.14846	4.90724	5.14639	4.99722	5.23067	5.36987	5.69554	6.50812	5.19898	6.39731	4.78059	5.0713
ALLC	3.66858	4.4402	3.92898	3.4546	3.86543	3.40349	4.03997	3.63238	4.10034	3.67923	3.91913	3.91363	4.03816	4.43038	3.79554	4.07619	3.66225	4.01295	3.3137	3.61574	3.62395	4.66925	3.65396	4.06647	3.80077	4.00782	4.00116	3.67105	3.92233	3.37882	3.59581	3.98948	3.37674	3.7754	3.53542	3.70549	4.20791	3.53278	3.39576	4.71678	3.52299	3.67449	3.86596	3.86262	4.2221	3.67332	3.97645	3.81894	3.90776
ALMS1	7.36832	8.73277	6.63837	7.45686	7.36914	7.83832	6.53696	8.29379	7.75066	7.73645	7.80236	7.59993	7.85094	8.787	6.9177	7.005	6.95657	8.72673	6.66793	6.88609	7.22708	8.60893	7.56182	8.18383	9.02517	6.57102	6.85406	9.01736	8.45377	7.73092	7.25911	6.65731	8.21538	7.03924	7.3856	7.96929	6.65499	7.60374	7.18392	7.01184	6.68031	7.47613	6.8423	8.76764	7.57072	7.37878	7.03835	7.49602	6.62587
ALMS1P	4.70376	4.90194	4.48361	4.561	4.33369	4.51145	5.12934	4.91864	5.51694	4.43483	4.53133	4.61508	4.39995	4.54492	4.75359	4.48164	4.51211	4.73903	4.4	4.60891	5.13622	4.90517	4.61394	4.43655	5.00985	4.47016	4.53142	5.92051	5.00274	4.60923	5.0958	5.40821	5.1842	4.83936	5.00149	4.55085	4.78135	4.9599	5.07278	4.94061	5.15517	5.01976	5.06481	6.0703	5.09278	4.98763	4.74562	5.26728	5.60769
ALOX12	2.85804	3.20794	3.13215	3.02812	3.04698	3.10486	3.61903	2.96158	3.16261	3.1786	3.02203	3.32832	3.16228	3.10603	3.26934	3.53018	3.15525	2.9228	3.29804	3.27686	3.19264	3.29984	3.17073	3.06104	2.99288	3.08783	3.43867	3.50122	4.07821	3.15075	3.47815	3.58488	3.1123	3.06522	3.0946	3.49036	3.47864	3.27449	2.96101	2.76728	3.29183	3.07769	3.04024	2.83901	3.21646	2.88031	3.57448	3.16504	3.35063
ALOX12B	3.18006	3.74115	3.4921	3.19445	3.64766	3.5547	3.70285	3.21643	3.32173	3.47885	3.24256	3.12042	3.10396	3.35856	3.37865	3.43229	3.32974	3.37302	3.19279	3.33263	3.39408	3.82991	3.9468	3.33201	3.23272	3.30373	3.42032	3.46167	3.81893	3.58786	3.87282	3.71865	3.34347	3.44086	3.23009	3.86504	4.13639	3.78266	3.30632	3.15345	3.33815	3.28083	3.44294	3.59367	4.45288	2.93018	3.5877	3.23009	3.3936
ALOX12P2	5.05591	5.52433	6.07815	5.12044	5.00345	5.15224	6.2818	5.16875	5.42931	5.09469	5.18923	5.3054	5.11444	4.88706	5.22979	6.00348	5.30272	4.65992	5.09624	5.04843	5.5145	4.93332	4.59815	4.87215	5.14665	5.08197	5.70817	5.10014	6.15723	5.37323	5.09188	5.33466	4.90903	5.09709	4.96339	5.1234	5.06536	4.86831	4.65452	4.86161	4.88546	4.84317	5.04656	4.83807	4.85863	5.33987	5.03113	5.10753	5.34863
ALOX15	3.20021	3.31719	3.43685	3.17896	3.27436	3.37448	3.06288	3.26376	3.3221	3.53114	3.11256	3.13804	3.07927	3.1443	3.16064	3.43127	3.03604	3.31808	3.13332	3.24889	3.35236	3.11304	3.26699	3.42089	3.08332	3.2216	3.44046	3.40964	3.68478	3.37223	3.45781	3.38424	3.13825	3.27035	3.11209	3.1419	3.54935	3.11003	3.18171	3.03462	3.03076	3.16531	3.16673	3.28772	3.09035	3.35061	3.2537	3.02657	3.73469
ALOX15B	3.72731	3.64115	4.56033	3.98055	3.67728	3.76854	5.57766	3.73649	3.71526	4.06048	3.83136	3.94583	3.70874	3.54361	3.82118	4.09521	3.70309	3.57778	3.83463	4.72385	3.7828	3.43088	3.92918	3.69266	3.94174	3.74165	4.53344	4.08895	4.30992	3.71014	4.45516	4.31111	3.86079	4.04813	3.58367	3.90039	4.25459	4.65899	4.93113	3.21312	4.04689	3.8406	4.002	4.23219	3.70495	3.68967	4.29073	4.39447	4.2596
ALOX5	8.2098	4.52589	7.57496	8.6039	6.57892	7.16873	9.8789	3.95913	5.78269	7.83292	5.52739	8.43057	6.45974	7.08531	8.592	4.92812	6.88653	7.18818	9.00387	9.07953	7.60614	5.17141	5.85589	6.16864	7.85869	8.21508	8.62848	6.90093	5.36288	5.31794	8.01085	7.02338	5.49226	5.36139	6.22274	3.75582	6.29831	6.53855	7.07576	7.6934	7.4993	4.7697	7.72095	4.05303	4.76784	3.43627	5.89955	6.63455	4.70804
ALOX5AP	9.89166	5.9576	5.8943	10.4396	9.73035	8.56968	10.9631	6.53582	6.99837	9.99317	7.98474	10.8365	8.60092	9.7609	10.5757	8.48911	7.66477	10.2728	9.53422	9.6801	8.78506	6.0238	8.1062	7.38318	8.77032	10.2385	9.11196	5.81924	5.42424	6.8425	9.23245	8.29146	5.28172	7.65106	7.94075	6.29966	7.73279	8.0979	9.48051	10.0848	8.3056	6.93141	10.3633	7.01788	6.79434	6.60548	7.29459	6.74224	6.90313
ALOXE3	4.69523	4.60494	4.76252	4.74075	4.61487	4.75783	4.9382	4.69517	4.97952	4.72157	4.77836	4.79608	4.65659	4.60375	4.89327	5.36004	5.26629	5.16319	4.84808	4.73954	5.11843	4.6889	4.76065	4.61953	4.79372	5.01283	5.12619	5.65965	4.90603	4.68005	5.05856	4.93143	5.20215	5.15479	4.96562	4.54153	5.00556	5.30778	4.85836	4.78722	4.9448	5.15315	4.81851	4.89332	5.21541	4.67755	5.3081	4.9913	5.28081
ALPI	4.02447	3.89654	4.5403	4.09858	3.99067	4.04336	5.1367	4.14117	4.1962	4.23028	3.898	4.03167	4.29163	3.84389	4.05218	4.55189	4.0008	4.20126	4.06697	4.2005	4.18559	3.96331	4.07563	4.41917	4.14985	4.13689	4.14966	4.35706	4.6784	3.48185	4.266	4.34617	4.5244	4.04813	4.0905	4.06013	4.31273	4.02539	3.89129	3.63296	3.90002	4.1733	4.05608	3.89366	3.60652	3.99072	4.31383	4.52337	4.26021
ALPK1	4.18968	4.05112	4.73433	4.2862	3.75486	4.32312	5.44021	5.31272	4.11197	4.32456	3.81626	4.79112	4.13957	4.05083	4.66037	4.19685	5.62795	5.08083	4.62887	4.29475	4.4335	3.93321	4.09445	4.52176	4.87826	5.0502	4.95786	4.91615	4.07821	3.32947	3.86897	3.78298	3.46154	3.52665	3.62469	4.17626	3.9425	4.25605	4.25505	5.4383	4.9378	4.13831	4.08645	3.42093	3.3975	3.66011	6.64754	3.74481	4.04631
ALPK2	2.95433	3.25756	3.64591	3.35509	3.90573	5.23018	10.6407	6.17172	5.09921	4.76909	4.46385	3.40296	3.92732	4.04944	3.52123	5.30492	3.12896	3.79147	2.96307	4.18507	3.24531	3.74217	5.98002	3.14553	3.1378	3.62024	4.0206	8.1188	3.71952	3.36721	3.80522	3.55518	4.76731	3.21879	3.4237	3.19774	2.87759	3.24709	2.90139	4.56023	3.30557	4.96801	3.42935	4.12637	3.44575	3.49159	3.80765	3.17639	3.91102
ALPK3	7.40175	3.96336	5.31541	4.65211	4.95829	5.00107	4.82319	4.24732	5.60025	4.94871	6.08159	6.63747	4.94825	5.34591	4.95964	4.86775	4.10646	5.32698	4.83944	5.2787	5.42355	4.47555	4.88807	5.69495	4.79117	4.14104	5.42792	6.28086	4.25432	4.45289	5.50732	5.13076	4.31563	4.89669	6.56959	4.74593	4.32771	4.56101	6.30517	5.11933	4.58113	4.67236	4.85587	5.45876	4.4253	6.88371	4.39078	3.62488	3.91648
ALPL	4.06146	4.06563	4.16242	3.74009	4.22071	3.64103	4.80657	3.55629	3.63479	3.96676	3.65113	3.8398	4.15444	3.79034	3.92014	4.10392	4.07835	3.52645	4.02234	3.85938	3.62721	3.87602	3.96233	3.81011	4.33716	3.73707	3.99454	3.37196	5.13377	5.58346	4.23389	4.04716	3.98846	4.41411	4.12214	4.34931	5.0275	4.27767	5.89418	4.51779	5.38996	3.9559	5.15188	4.15587	4.14473	4.10392	5.306	4.86092	4.85248
ALPP	4.09636	3.92123	4.30111	4.00939	3.97145	3.9922	4.53681	4.03329	4.14151	3.81966	4.01727	3.97652	4.30428	4.22446	4.06324	4.63672	3.98211	3.78775	4.43885	4.18627	3.94249	4.22436	4.19822	4.33666	4.02992	4.06107	4.29425	3.96397	4.04353	3.506	3.63622	4.18118	3.70317	3.92713	3.85235	4.06106	3.9685	4.09238	3.89262	3.62656	3.609	3.93096	3.83468	3.73035	4.20178	3.615	4.07206	3.87011	4.02185
ALPPL2	4.95933	4.97545	5.52179	5.08148	4.98829	4.90454	5.02831	4.79766	4.95964	5.4394	5.03715	5.13301	4.98765	5.15294	4.85327	5.23925	4.76366	4.6102	5.07012	5.04925	4.95726	5.10418	5.14531	5.10676	4.91165	4.78064	5.25127	5.01752	5.86213	3.67388	5.12911	4.86648	4.99178	5.13313	4.49424	4.80409	5.02033	4.77081	4.38988	4.67566	4.91139	5.04442	4.54525	4.65238	5.0526	4.18275	5.11042	5.0153	5.26438
ALS2	5.12828	5.0641	4.0842	4.88519	4.58903	4.90478	5.34906	6.11337	3.98714	5.60645	6.54162	6.13026	5.68026	7.24808	5.85893	7.34982	5.20768	6.15008	5.36503	4.48898	3.32585	6.77916	5.68471	5.57824	5.59341	5.60463	3.9451	5.25684	3.70041	6.01287	4.78571	3.02347	3.61352	3.59211	4.1719	4.0246	4.58719	3.88554	3.89601	5.0946	4.53899	5.88763	4.24496	5.18366	5.24065	6.1548	5.29625	5.72316	4.65774
ALS2CL	4.19844	4.40938	4.48169	4.56544	4.18688	4.24912	4.57294	4.09698	4.18445	4.21294	4.22362	4.22768	4.12696	4.66153	4.14584	4.72945	4.22489	4.91773	4.10074	4.36412	4.2464	4.57491	4.97364	4.2716	4.78543	4.50361	4.46011	4.83468	4.54424	3.98603	4.22805	4.82256	4.56115	4.27971	4.20851	4.42859	4.42573	4.37197	4.59833	3.715	4.50588	4.31406	4.23821	4.2838	4.20881	4.00037	4.74894	4.39541	4.63192
ALS2CR11	4.46906	6.45445	6.43466	2.78154	3.99732	2.58865	3.76255	5.43808	2.76479	2.68689	4.3356	3.1686	2.45868	2.74065	2.65274	2.97718	3.18933	2.59237	3.00092	2.56992	2.89256	2.79275	2.80498	2.67265	2.60063	2.63614	3.10446	3.46701	2.83008	4.52551	2.85496	2.76896	3.01378	2.67861	4.60831	2.89201	2.9913	2.78633	3.09724	2.82586	3.06486	2.91157	4.67284	2.92727	2.8821	3.18576	3.2238	3.82107	2.93352
ALS2CR12	4.43389	3.94237	6.58658	4.01604	3.96713	4.15197	4.49972	4.69883	4.95186	3.94977	4.7359	4.55096	3.83729	4.32628	4.0674	4.57002	4.16433	5.30919	3.92523	4.12562	4.32368	3.75275	4.52833	3.62867	4.68276	3.61527	4.13868	5.22926	5.47124	4.61272	4.4189	4.23477	4.51759	3.87756	4.43013	4.04404	3.65977	3.81299	4.1862	3.41991	4.24695	3.96454	3.74773	4.74261	4.18719	4.62271	3.68504	4.46346	4.10234
ALS2CR8	5.00253	3.95514	3.80364	4.12791	4.93004	3.73318	3.11089	4.77065	4.46375	4.38017	4.39228	5.43344	4.86862	5.75803	4.46121	3.91568	3.99407	5.22181	5.50048	4.61296	4.03449	5.67753	4.52754	5.46789	5.30775	4.60457	3.88998	3.18369	4.13796	4.48246	5.17097	3.12517	4.3638	5.33436	5.1234	4.61506	5.02495	3.73524	5.86114	6.43868	6.37577	5.3317	5.03411	5.98547	5.66769	5.58088	4.94848	4.61136	5.71383
ALX1	4.19943	4.23628	4.03542	4.11469	3.84132	4.09462	3.91952	7.29509	4.12285	4.06596	4.27801	4.02617	4.06644	4.12568	3.71383	4.09181	5.75335	8.04595	4.12329	3.91879	4.28539	4.0393	3.9852	4.18419	4.17936	4.10555	3.96175	3.94352	4.1113	5.71814	4.59593	4.29167	4.176	3.94186	3.94955	3.99136	4.10696	3.90142	3.94371	4.37521	3.95667	4.11902	3.86094	4.47551	4.11748	3.96663	5.12704	4.0967	4.03031
ALX3	4.65155	4.77133	5.17787	4.79776	5.42363	4.90553	4.84248	4.4984	4.67516	4.78726	4.45319	4.65754	4.60533	4.66115	5.03646	4.76672	4.5627	4.73518	4.46243	4.80883	4.51302	4.88737	4.54593	4.70024	4.74254	4.92122	5.1265	4.80367	5.48572	4.28174	4.83686	6.23116	4.7967	4.85272	4.43013	4.91453	4.69739	5.00576	4.25408	4.47869	4.54225	4.31322	4.69192	4.66328	5.59492	4.63767	4.59047	4.55957	4.86412
ALX4	4.09414	4.28736	4.81696	4.58657	4.38611	4.55032	4.57158	4.47513	4.4556	4.56736	4.48389	4.51898	4.31563	4.47558	4.52688	4.72088	4.68555	4.66335	4.30394	4.56472	4.33703	4.55469	4.50448	4.52789	4.53254	4.48932	4.86468	5.12632	5.28995	4.42531	5.27484	4.83883	5.17744	4.94006	4.86927	4.83785	4.80244	5.01067	4.48324	4.51838	4.73444	4.83365	4.72067	4.75185	4.95307	5.1081	5.06878	4.55961	4.87406
ALYREF	8.65406	9.47769	6.06107	9.68897	9.73562	10.2381	9.64666	10.0662	9.40628	9.66982	9.65658	9.15927	9.25568	9.62985	8.63789	10.4574	10.7463	8.98551	8.33325	8.16165	8.31982	10.2024	10.1439	9.91776	9.37612	8.9115	8.43854	8.96232	5.30921	5.97869	7.11369	8.68197	8.69763	8.33904	8.67032	9.1961	8.16648	8.60714	7.75163	8.04505	7.44564	8.07433	8.3146	9.45935	9.64372	9.25156	9.36727	8.96263	7.05096
AMACR	7.87865	6.32829	7.62077	6.12099	5.645	5.37347	5.63973	5.16934	5.4607	6.88319	6.37271	6.66989	5.67077	5.2115	6.36312	4.94888	6.87773	5.50961	7.04207	6.21886	5.93414	6.70627	6.06448	5.74665	6.46041	6.39947	6.00702	5.94511	6.77552	6.21724	5.67418	5.77493	5.03359	5.42282	5.4869	5.68913	5.59286	5.16712	6.09825	5.37098	5.96654	5.0996	5.05854	4.86742	4.77095	4.77452	5.60133	5.59678	5.49775
AMBN	3.96308	4.03813	4.51246	4.54982	4.09296	4.37907	4.60392	4.26563	4.09473	4.16734	4.15602	4.63337	4.11692	4.24394	4.16071	5.08848	4.07633	4.15105	4.09189	4.34318	4.2635	4.03964	4.10505	4.20222	4.13511	4.70845	4.4544	4.55466	5.0139	4.15224	4.68054	4.57946	4.47796	4.40519	4.07164	4.31062	4.32832	4.43409	4.18177	4.09496	4.93193	4.73253	4.26875	4.22754	4.5602	4.19479	4.48994	4.44564	4.44135
AMBP	4.13777	4.12512	4.35727	4.45901	4.235	4.10462	4.22567	4.62889	4.20222	3.95743	4.40946	4.20312	4.20402	4.50345	4.25824	4.94662	4.3807	4.29548	4.03805	4.17932	4.33866	4.45951	4.28387	4.40382	4.16199	4.39422	4.47939	4.3517	4.38943	4.19036	4.6298	4.2377	4.84702	3.89581	4.09753	4.25042	4.13797	3.91897	3.82283	4.32603	4.12162	4.19538	4.18374	4.30472	4.16241	3.8846	4.2926	4.09859	4.17562
AMBRA1	7.11021	7.57633	7.39251	7.09449	7.26702	7.37986	7.58921	7.81872	7.25882	7.39571	7.31918	7.12609	7.26067	7.18041	6.57826	6.40409	7.13826	7.01029	7.41234	7.25337	6.92528	7.41791	7.10415	7.19934	7.28954	7.30236	7.18071	9.02329	7.21165	6.52318	7.10279	6.76029	7.47322	7.13394	7.2789	7.19439	6.99342	7.26479	7.01715	7.45079	7.3618	7.25698	7.08963	7.64586	7.24589	7.44243	7.4524	7.15234	6.96751
AMD1	8.30375	8.02658	8.89433	8.73158	7.73297	8.01207	8.23683	7.21269	7.97485	8.78361	9.64375	8.4648	8.16493	8.0364	7.83816	7.78336	7.7743	7.01736	8.1911	8.71061	7.52728	7.88271	7.96784	8.33767	8.87789	8.50882	8.9137	7.22041	8.49985	7.81511	7.25466	7.63124	6.5935	8.15378	8.48726	7.63903	7.88861	7.50255	7.72721	7.62854	9.01765	6.91241	8.03451	7.62388	8.42233	8.07398	7.9987	7.83761	8.52484
AMDHD1	3.84565	3.51875	3.82773	3.64596	3.64622	3.71522	5.91239	3.46025	4.17862	3.74888	3.06613	3.67812	3.80101	3.35833	4.03647	3.50124	3.88505	3.40686	3.44993	3.68405	4.10794	2.88643	4.90069	3.64308	3.38563	5.64475	3.84947	3.55252	5.27778	3.84988	3.77231	3.23699	3.13121	3.96542	3.51875	3.77396	4.05335	3.93915	3.77652	3.10245	3.54793	3.47381	3.45616	3.79987	3.79255	3.10918	3.49499	3.87919	3.48612
AMDHD2	5.72286	5.25036	5.70109	5.53215	5.12614	5.88088	6.7643	5.11549	5.20041	5.7643	5.49512	5.69474	5.57893	5.38832	5.3955	5.93334	5.43904	5.51049	5.32084	5.78751	5.46616	5.31784	5.77896	5.87828	5.6835	6.60429	5.90436	7.12246	5.79486	5.11599	6.14688	6.10718	5.7176	5.13225	5.61519	5.45386	5.04016	6.3189	5.15873	5.39718	5.55985	5.31114	5.92455	5.06832	6.72039	5.44008	6.55055	5.59516	5.5612
AMELX	3.29222	3.14494	3.3201	3.19482	3.18252	3.20205	3.18602	3.25148	3.1502	3.02174	3.24102	3.16629	3.20505	3.1394	3.16933	3.39472	3.29043	3.12221	3.14873	3.00474	3.08782	3.2211	3.04765	3.17286	2.94214	3.40104	3.07712	3.26341	3.47471	3.1092	3.25723	3.03199	3.21898	3.19814	3.28556	3.1652	3.00069	3.56648	3.08969	3.0426	3.15123	2.92858	3.1107	3.08158	3.04057	3.15501	3.36476	2.81166	3.22179
AMELY	3.85495	4.01323	4.11717	4.0366	3.79136	4.02182	3.97853	4.21148	4.09529	3.91345	4.05399	4.10339	3.81982	4.05709	3.83666	4.90976	3.98006	3.87675	3.99514	3.99193	4.14657	4.25842	3.85747	3.91845	3.76323	4.00578	4.08223	4.47472	4.69806	3.90247	4.00368	4.00098	3.9273	4.04813	3.91347	4.17659	3.91802	4.14598	3.73452	3.74147	4.11145	4.03342	4.01553	4.01116	3.89862	3.98755	4.17485	3.99824	4.30175
AMFR	8.88644	7.66284	8.37984	9.06355	8.13577	7.9006	7.36148	8.53565	8.29264	8.20566	9.43165	7.5789	8.10651	8.45818	9.11795	7.61871	8.23328	8.1972	9.58196	8.95696	8.20992	8.34536	7.8661	7.85679	9.63254	8.15085	7.18643	6.39289	7.20108	4.90389	6.20554	6.45645	5.44928	6.38174	8.54161	7.11667	5.86883	6.82293	7.15192	5.07172	6.83769	5.78622	6.42703	6.84746	5.2721	7.03612	6.7785	4.18727	5.86902
AMH	4.51608	5.55499	5.06215	4.71337	5.53994	4.71741	4.43192	4.95656	6.91191	4.60821	4.73544	4.33319	4.88596	5.30524	4.90176	4.986	5.26726	5.05775	4.40243	4.46588	5.09547	5.98931	6.42602	4.9895	4.68868	4.53454	4.42434	6.28843	7.68831	6.71955	5.06223	7.43255	8.87106	6.19089	4.87419	7.40451	5.60577	7.68675	5.45202	5.21953	5.08726	7.18749	5.95099	4.91224	4.75026	4.99119	6.43387	6.86513	4.68841
AMHR2	5.16252	5.10961	5.30169	5.00117	5.14211	5.05306	5.16299	4.86847	5.06552	4.81293	4.95855	5.26177	5.25185	5.09674	5.04742	5.61428	5.15631	5.13735	5.37276	4.93285	5.30327	4.94783	5.16257	5.19966	5.06916	4.86766	5.33816	4.97167	5.93414	4.53518	5.17946	5.50505	4.77768	4.98901	5.01119	5.01084	5.29536	5.20843	4.86495	4.42033	4.78886	5.01567	4.90558	4.82023	5.21206	4.28203	5.20172	4.95328	5.0654
AMICA1	5.33967	5.22925	5.56201	6.19857	5.32932	5.56322	6.43573	5.18388	5.14668	5.73477	5.2955	5.50857	5.01354	5.5455	5.98702	5.29307	5.44003	5.80809	5.6952	6.05232	5.77051	5.43192	5.48598	5.7281	5.75847	6.09179	6.57666	5.70206	5.48513	4.43817	6.26308	5.23653	5.39278	5.11017	5.23584	5.25727	5.43015	5.83002	5.15599	5.14674	5.23583	5.04843	5.04828	4.82515	5.28299	5.49436	5.865	5.24691	5.59403
AMIGO1	4.49147	7.11208	5.45637	5.90965	6.5182	6.25256	5.34035	6.15862	6.91762	5.59464	5.95257	6.90913	6.08485	6.56069	6.97283	6.1547	5.46696	5.59655	6.01169	6.04271	5.56828	5.89384	5.50479	6.14097	7.10868	5.88003	5.44467	5.57335	5.74559	5.71651	6.05845	6.2171	6.78276	6.49069	6.26129	4.66475	7.25379	5.49675	5.04451	6.16482	6.87126	6.52698	5.88219	6.02665	5.68669	6.58208	4.87467	5.8526	7.27981
AMIGO2	8.12977	6.70072	6.52571	9.25299	7.80891	6.26976	5.29024	7.65587	4.89241	7.88601	3.73693	7.99735	7.26627	7.48649	7.41531	5.05667	8.11978	8.56507	7.0586	7.5264	4.15429	4.40624	6.20566	6.85404	7.66253	7.74337	6.92598	8.87558	5.23493	7.96265	9.24731	4.24934	6.49644	4.3787	6.15069	8.83575	8.10103	4.91725	8.81866	8.89187	7.34974	6.92568	6.26448	7.75497	3.50453	4.64047	7.55293	4.88272	5.36384
AMMECR1	6.0018	7.14494	5.973	6.58013	6.36577	7.06655	5.70992	7.52128	6.73648	6.92978	8.20357	7.16598	8.32077	7.79251	5.68194	6.13261	6.5166	7.27124	5.73671	6.29396	5.20654	6.79226	7.76978	7.70826	6.5113	6.71332	5.87091	4.93775	5.18308	6.51296	5.51184	5.68006	6.35427	6.61206	6.58883	6.73658	6.43609	6.52233	6.42963	5.40594	4.33787	7.21393	5.87774	6.11617	6.30526	7.38833	7.096	5.7441	4.38397
AMMECR1L	8.68128	8.90327	8.12088	8.49523	8.90389	8.62147	8.13895	8.97992	8.49374	8.44918	8.93996	8.86362	8.92205	9.37287	8.34677	9.30029	8.97444	7.37269	8.11841	8.37579	8.76401	8.68177	9.06689	8.79995	8.58942	8.33247	8.0515	8.66026	8.3158	8.77423	8.80653	8.21895	8.45579	8.63341	8.60149	8.59714	7.7506	8.17094	8.49975	8.54303	7.7161	8.98163	8.73145	9.34866	8.53724	9.00309	8.44011	8.50688	7.97277
AMN	3.61956	3.88544	3.99374	3.91562	3.8959	3.65095	4.11822	4.0449	4.36439	4.0904	3.85857	3.82168	4.0438	4.05793	3.76723	4.92405	4.00244	3.88458	3.68843	3.56445	4.03936	4.17178	3.75145	4.17475	4.09856	4.21065	4.27504	4.02657	4.1131	3.79859	4.23111	4.25949	3.9954	4.21501	3.92373	3.85861	3.93694	4.20591	3.61207	4.09301	3.7061	4.434	3.90961	4.17211	4.2755	4.17941	3.93187	4.01529	3.75366
AMOT	4.38829	3.8637	3.0545	3.42662	3.26224	2.93714	3.00194	3.30133	3.41137	3.47997	3.31535	3.38154	3.33501	3.32877	3.87246	3.06428	3.88943	3.36637	3.34668	2.9067	3.11855	3.06668	3.04797	3.18127	3.67849	2.63614	3.00722	3.73014	3.40436	2.83438	3.14013	3.44696	3.16014	2.96379	2.93354	3.90483	4.65508	3.68423	3.59395	2.74041	3.98717	2.9035	2.96763	3.25764	3.02969	3.64667	3.01274	3.30993	3.60857
AMOTL1	8.59329	7.37418	7.2083	8.56624	8.51802	8.9731	6.90487	9.23049	8.79656	8.42114	7.45734	8.57668	7.78975	7.70939	8.67055	8.1573	10.1136	8.68247	7.81932	8.94051	8.71863	8.2439	8.61925	9.0637	9.64462	10.1326	9.05021	8.14361	6.67421	8.20567	8.57936	9.75733	8.67857	7.77712	8.49902	8.43339	8.11841	8.53799	8.75289	9.45781	7.97306	9.05334	8.67799	8.86182	8.54082	8.97409	8.59818	8.21709	8.11092
AMOTL2	7.87932	9.3216	6.59202	8.08958	8.89337	7.23081	5.47923	7.71165	7.23439	7.78001	6.48799	8.42307	8.27584	7.65616	7.82412	7.1615	6.7552	7.0581	8.68765	7.66087	7.65184	8.53818	8.44275	6.862	9.30139	5.86692	9.26225	6.40197	6.36706	8.18256	7.30939	5.65715	5.90935	9.64446	8.38767	8.7363	8.02587	9.41647	9.17682	7.52916	9.25286	7.10237	9.03292	7.19983	8.5568	7.84436	5.70434	7.99326	6.92979
AMPD1	2.94577	3.32201	3.11385	3.22079	3.24113	3.35413	3.43631	3.42708	3.43908	3.17511	3.35338	3.52183	3.21912	3.35337	3.11553	3.75978	3.04716	3.19316	3.02322	3.39636	3.19717	3.2185	3.15285	3.25196	3.23643	3.22813	3.1794	4.46977	3.95904	3.03311	3.62353	3.41563	3.30565	3.13011	3.20973	3.23618	3.24475	3.40594	3.46461	2.9642	3.32442	3.07831	2.91219	3.09045	3.12411	3.38059	3.60527	3.35657	3.49115
AMPD2	7.07366	8.35464	7.26946	7.56796	7.32532	7.59799	7.71456	6.62892	7.67653	7.35261	7.56313	7.82143	7.88468	8.13615	7.50403	8.89534	7.56261	6.89018	7.12066	7.92444	7.66156	7.43707	8.15263	7.75169	7.18832	7.77739	7.67988	8.48048	7.56055	7.71845	8.31173	7.3983	7.78091	7.606	7.92021	7.27807	7.95729	7.23655	7.0709	7.5881	7.44103	7.28481	7.45787	8.05592	7.5563	7.37821	7.76464	7.00766	7.94245
AMPD3	7.27535	4.56487	6.52571	7.2007	5.34981	5.19657	7.06149	4.31541	5.59529	6.45586	5.72261	7.51414	5.494	6.16853	6.696	5.67038	6.1323	7.9558	6.83914	8.24047	6.39043	3.98926	6.07306	5.86973	7.26255	9.18825	8.27891	6.06887	4.74223	5.78492	7.93369	5.96625	4.48353	6.12639	6.30722	6.49959	6.60876	7.1774	7.61433	7.0732	7.77334	5.10832	6.90697	4.59803	5.34981	4.29484	6.82166	5.31766	5.94984
AMPH	8.50015	7.47551	6.92786	7.36914	8.12201	6.62359	3.57242	4.69161	6.47332	6.6214	5.38726	5.53773	6.67732	4.50726	5.7925	4.82752	6.52214	5.95987	7.52324	7.16988	7.24208	6.86063	6.84831	5.76167	7.57943	6.2562	5.78617	5.98094	6.60471	8.61366	6.2982	6.79581	4.31557	7.09121	6.63873	7.80571	9.12772	7.14206	7.74034	6.36267	6.76165	5.24584	6.7429	7.25451	7.42496	6.58962	4.27015	7.6453	8.8652
AMT	5.8699	6.46913	6.27872	5.93558	5.86543	6.16457	6.96328	5.80957	7.05626	5.98989	6.65601	6.02283	5.94591	5.55462	6.41901	7.21971	7.39082	7.09323	6.81666	6.16558	7.36957	5.09369	6.61536	8.11616	7.55739	6.30782	7.3304	5.56424	6.25672	5.89759	6.60003	6.38152	6.75624	7.7311	7.49728	8.30075	6.86794	6.222	6.40591	6.30841	6.9387	6.10506	6.06405	4.83807	5.92996	6.72592	6.28514	6.47973	6.82243
AMZ1	5.78276	5.91734	6.28287	6.01816	6.05161	5.92257	6.26332	5.80838	5.98049	6.02347	5.88627	6.07638	5.96159	5.9423	6.07173	6.27034	6.13033	5.93611	6.73549	6.37675	6.52259	6.0226	6.22091	5.96244	6.10572	6.22672	6.24941	6.25278	6.91822	5.99605	6.31724	6.97935	5.91066	6.54643	6.02183	6.12285	6.12792	6.51019	6.08521	5.85756	6.38801	6.02198	6.3824	5.76498	6.01283	5.44241	6.45014	6.18214	5.96187
AMZ2	9.91482	9.84703	8.82773	9.86957	9.60446	9.54389	9.88695	9.95731	10.5789	9.98888	9.88063	9.75886	9.23268	9.46393	9.92638	9.42109	10.5731	10.0843	9.41938	9.28362	9.04938	10.0559	10.0006	9.96712	10.5407	9.18238	9.13839	9.71325	8.98655	9.3884	9.49382	9.72054	9.51033	9.46021	9.8274	9.51826	9.88902	9.33279	9.95385	9.26739	10.1732	9.2491	9.38067	9.29488	9.97078	9.43788	9.95753	9.14594	9.8359
AMZ2P1	8.36739	7.67152	6.79373	8.07099	7.73692	7.34824	6.8483	8.37282	8.30307	7.83854	7.98629	7.75004	7.19771	7.70118	8.18779	7.30182	8.64795	8.34286	7.79123	7.69226	7.32236	8.34754	7.81054	7.88982	8.57009	6.93342	6.92147	6.8625	6.9349	7.77195	7.26692	7.87009	7.45528	7.38984	7.48597	7.20243	7.6754	6.99078	7.77016	7.45213	8.28895	7.41068	7.42831	7.34991	7.88276	7.92231	7.396	7.08375	7.99296
ANAPC1	5.72535	6.70708	5.32042	6.22368	6.17614	5.47603	5.665	5.92932	6.30581	5.54642	6.14318	6.16726	6.46849	7.63002	5.48039	7.21201	5.61754	5.95518	5.84556	6.24122	5.86846	6.56407	5.72992	6.65671	6.94316	5.91976	6.64054	5.74772	5.43716	7.15427	6.52883	5.11472	5.80135	6.1172	6.5782	6.24705	5.8333	5.14435	5.85842	6.89759	5.61817	5.94423	6.97417	7.60694	6.62011	6.79614	6.42874	6.53174	5.08805
ANAPC10	7.83113	6.70883	5.88241	7.49158	7.4743	7.57	6.85138	6.90559	5.7926	7.57971	7.82706	7.91436	7.3535	7.92476	7.45008	7.09658	7.18943	7.93171	6.69412	7.25947	5.90642	8.11193	7.10718	7.81419	7.24509	7.88618	6.13209	5.51999	6.20562	6.24553	6.29974	5.77782	6.73867	6.26654	6.99582	6.44467	6.13651	6.29822	6.58823	6.76953	6.83555	6.1465	7.0493	6.27283	7.32074	6.74291	6.87988	6.39003	6.11691
ANAPC11	10.5902	10.5545	9.78423	10.5093	10.7268	10.9909	10.7399	10.391	10.2819	10.6019	10.9668	10.0086	10.2387	10.0305	10.0999	10.5532	11.3998	10.3986	9.20901	9.90661	9.96452	10.4349	10.8012	10.4823	10.4679	9.95544	9.88338	11.3545	9.15035	10.27	9.92112	9.95904	10.3168	9.8365	10.0693	10.4168	10.3489	10.5602	9.7996	9.79471	9.982	10.0949	10.2516	9.73742	10.662	10.0104	10.8829	10.5409	9.67965
ANAPC13	9.94914	10.3445	10.0457	10.4451	10.4484	10.3585	9.16432	10.5461	9.80872	9.76641	9.35539	10.6752	10.5996	10.1948	10.4929	10.3907	10.0588	10.2525	10.4697	10.1336	9.52153	10.5102	10.1797	10.38	10.6723	9.78904	9.85428	9.26951	10.2667	10.5159	10.1888	8.96451	9.5103	10.7177	10.5076	10.7172	10.3132	10.469	10.3	9.9633	10.1624	9.61668	10.4919	9.84643	10.9373	10.1452	9.95864	9.72779	9.93556
ANAPC16	8.65813	8.17879	7.80654	8.67393	8.6547	8.53586	8.08931	8.50464	7.69349	8.56818	9.34978	8.63183	8.6302	8.58012	8.66516	7.90556	8.27424	9.35967	8.04607	8.61238	8.01215	8.90559	8.31643	9.15186	9.30719	8.80609	8.23538	7.74053	6.33027	7.41561	7.25815	8.40209	7.25668	7.57711	7.98303	7.72766	7.93363	7.45939	7.93019	8.0161	8.17159	7.57181	8.09739	7.16991	8.471	7.47561	8.1253	7.46225	7.54533
ANAPC2	5.33226	5.19779	5.91168	5.47511	5.94687	5.53291	6.51925	5.98356	5.83648	5.48168	5.40195	5.53154	5.58494	5.48806	5.2286	5.63884	5.6193	5.29645	5.62833	5.20889	5.72366	5.58857	5.65437	5.42285	5.50319	5.87311	5.81902	7.29246	7.77407	6.5901	7.13706	7.76259	8.39833	6.96733	7.24324	7.10942	7.18321	7.73236	7.13217	6.78981	7.42667	7.12573	7.91628	7.47239	7.35015	7.18993	7.29393	7.74328	7.04947
ANAPC4	8.93429	8.72613	8.93448	8.40316	8.02635	8.89737	9.17697	8.78218	8.98678	8.38615	8.92503	8.09985	8.06353	8.39375	8.16685	8.37	8.98176	8.73002	8.38413	8.5186	9.02797	8.3949	8.03639	8.64804	8.07345	8.40806	8.80897	9.08845	8.95301	8.68357	8.74927	9.05661	9.30774	8.68985	8.74302	8.72798	7.759	8.42231	8.33869	8.38457	8.06541	8.96237	8.30123	8.13421	7.95692	8.81039	8.33642	7.53018	8.12745
ANAPC5	4.41386	5.77783	4.75415	4.22522	4.14179	5.17644	4.75797	4.8498	4.63968	3.85811	4.49439	4.26859	4.12022	4.14211	5.18363	5.31016	5.27333	4.24701	4.45886	4.1138	5.03089	4.53896	4.83488	4.34631	4.38449	4.13117	4.76199	3.98457	4.2733	6.10785	5.332	4.75177	5.51224	5.85733	5.92602	6.13594	5.16853	4.93907	5.75467	6.73006	5.89462	6.11585	4.63257	5.33265	5.08517	6.49769	5.9325	5.85906	5.25213
ANAPC7	7.55728	8.02377	6.41316	6.70485	7.07811	6.95321	7.31173	7.23155	5.8723	6.05679	6.86377	6.42758	7.57104	7.75877	6.44327	5.63879	6.72363	7.15694	6.64164	5.99147	6.29016	7.52496	6.75537	7.48109	7.63474	5.62846	6.19084	5.66652	6.79764	7.2481	6.41063	4.78651	6.32952	6.71251	5.99948	5.979	7.14037	6.38264	6.64735	7.28385	6.1281	7.62872	5.78139	7.26632	5.16229	6.68083	5.66982	7.04475	6.47491
ANG	5.31832	4.16145	6.21694	5.86958	4.57768	5.12918	5.66756	5.21252	5.28926	5.95889	6.28851	6.71751	5.86371	5.82614	6.02891	5.63307	5.35329	7.35209	5.42575	7.172	4.42722	5.83747	6.13696	4.5336	5.14055	5.97023	5.22611	5.28021	5.00066	4.61239	5.2986	5.13772	5.40052	4.19166	5.59867	4.36028	4.7248	3.95912	6.12856	4.52602	5.11444	5.12542	5.46091	5.39383	4.75176	4.99634	6.76878	4.64481	4.9203
ANGEL1	6.04735	5.67865	6.41803	6.03267	5.90356	6.5722	6.07849	5.85484	6.62829	6.39155	5.96208	6.09335	6.53095	6.31944	6.25253	6.08104	6.1108	6.13748	7.61694	7.01813	7.17101	6.19075	6.33454	6.49666	5.77632	6.76825	6.87359	6.59972	6.42932	6.664	7.10265	6.3955	6.69455	6.58303	6.23695	6.14846	6.51293	6.55103	6.61905	6.96134	7.40965	6.77093	6.39767	6.09623	6.3812	6.18635	6.49229	6.13572	6.40969
ANGEL2	6.25658	6.66011	5.99651	5.93401	6.66327	5.94136	5.12372	6.66295	5.58408	5.65177	6.82575	6.50347	6.57355	6.44979	6.41942	6.67805	5.35718	7.12858	6.24847	6.12719	5.12967	6.06544	6.09267	7.15432	6.61848	5.80967	5.71318	4.85049	4.44116	7.10331	4.90298	4.87293	5.89904	6.95302	6.56267	6.10203	5.26476	4.79899	5.72824	5.86343	5.0186	6.09201	5.17527	7.12233	5.88887	6.61862	5.91947	5.85191	5.34553
ANGPT1	9.04075	5.72763	6.79435	8.22843	7.1648	5.71361	4.35164	7.8721	3.69808	5.79962	5.32059	6.04299	3.56791	6.77402	6.70261	3.79567	8.67136	7.9718	4.7147	5.02969	3.7565	5.08421	8.42857	7.1483	9.38739	7.1052	6.72511	3.82519	6.21121	5.69802	6.34092	7.71455	4.05229	3.84044	6.01043	8.51516	8.8091	7.85255	7.50209	4.98396	6.68012	3.94452	5.16733	5.0969	3.37238	5.6583	7.71444	6.42359	4.14823
ANGPT2	6.10123	7.08469	10.1727	8.70593	8.63357	7.38455	6.61701	7.3377	7.64818	8.06432	7.55124	6.11802	8.58651	7.33306	10.013	8.54707	5.54766	8.09107	7.83488	10.4849	7.87111	7.21498	7.96988	6.02922	9.24589	7.54395	9.58873	6.17983	8.53055	7.44569	7.1867	7.63284	6.64381	5.11461	8.22868	6.37413	4.41204	6.6534	8.807	6.24202	4.71102	8.08075	9.71475	5.83136	6.3142	8.49814	6.61607	7.19096	3.83907
ANGPT4	5.03838	5.23432	5.4318	5.44741	5.30298	5.09956	5.80505	5.38972	5.3649	5.55134	5.5003	5.45637	5.32143	5.19263	5.17133	6.00494	5.3631	5.218	5.17439	5.0705	5.36451	5.43542	5.47623	5.43369	5.44509	5.65194	5.51566	5.69105	5.62771	5.13834	5.54616	5.57842	5.29638	5.46616	5.29638	5.56708	5.20059	5.65647	5.02777	5.0805	5.42325	5.12133	5.27133	5.09123	5.76859	5.12655	5.39626	5.49686	5.23631
ANGPTL1	6.83681	5.09832	6.51506	6.91424	4.19604	6.8793	4.87328	6.4631	7.9296	5.60729	3.67367	4.01502	5.606	6.42991	5.18646	5.83051	7.24163	5.76651	2.86019	3.0779	3.71178	4.82965	4.76704	7.55215	6.07928	3.44005	4.05831	7.48044	4.36467	4.25958	6.61603	5.02666	7.23112	3.78977	4.03863	2.892	4.55369	4.38579	5.46006	4.65621	3.99935	6.48744	3.54303	4.34304	3.90335	8.09991	5.72494	3.72053	6.36506
ANGPTL2	9.99082	7.23345	7.95849	9.0667	8.90363	7.58631	7.17323	9.53971	7.53979	7.63272	7.94645	9.63995	7.96045	8.76461	7.37325	7.41287	6.09282	6.32186	9.37378	9.28187	9.5232	5.40163	10.6588	6.98279	6.55395	10.2614	8.6522	7.90322	7.15239	7.95438	8.10706	9.52685	6.86597	8.17949	8.88389	9.08699	7.15988	8.91642	10.0818	6.83225	8.51758	7.74338	9.573	4.91522	7.46202	8.22093	9.09552	8.05065	6.31893
ANGPTL3	3.2379	3.33121	3.57581	3.02174	3.17711	3.18928	3.38855	3.26748	3.35848	2.98988	3.61135	3.20723	3.1096	3.04184	3.12939	3.77415	3.33834	3.18139	3.10979	3.06455	3.36488	3.22577	3.22817	3.19112	3.09656	3.22235	3.33863	3.3232	3.3405	2.96645	2.9485	3.15908	3.27012	3.15989	3.35795	3.0566	3.05535	3.19112	3.14278	3.13472	3.18122	3.0916	3.03199	3.03291	3.21645	3.68348	3.12882	3.19836	2.95175
ANGPTL4	5.65306	5.6285	8.75133	7.50131	5.65004	5.84158	8.83371	6.3813	7.03119	9.38601	8.45759	6.40091	6.96163	6.58114	7.04814	7.49717	6.50216	8.94915	5.27471	8.51654	5.62763	5.97036	7.30932	5.71883	6.22412	7.70709	7.10936	6.56989	6.31063	5.31011	6.37427	6.88841	6.31946	6.01227	6.7787	5.90684	5.41491	5.78002	6.88409	6.62219	6.41071	5.762	7.21909	6.08907	5.86291	6.98407	8.11994	6.35977	6.40826
ANGPTL6	5.21627	5.12311	5.24046	5.16395	4.98819	5.2412	5.32356	4.9327	5.06925	5.39914	5.01764	5.72525	5.15639	5.10138	5.11256	5.59181	4.64251	5.25739	4.91486	5.21602	5.25967	4.90678	5.20509	4.88801	9.31713	4.971	5.34592	5.23763	5.79487	4.75954	5.55986	5.42515	5.63327	5.08062	5.13363	5.46364	5.1992	5.23457	5.3768	4.6965	5.0186	4.44863	5.55724	5.19621	4.87257	4.65732	5.30378	5.32151	5.1167
ANGPTL7	3.80772	4.04325	3.95325	4.10746	3.80889	3.66337	3.85185	3.98712	3.95117	3.95298	4.12572	3.91387	3.99409	3.68482	3.79977	4.00775	3.90518	3.96068	3.79911	3.87466	3.97474	3.79324	3.88452	3.74533	4.01229	3.95788	4.17904	3.86585	4.55504	4.18476	3.77231	4.04083	4.0234	3.9556	3.70187	4.00565	3.83695	4.14066	3.73088	3.66991	4.00192	3.8244	3.9167	3.76459	3.99049	3.98391	3.89059	3.93131	3.70757
ANK1	3.53954	4.91838	4.61198	4.07521	4.18788	3.853	3.89051	3.70434	3.60245	4.12111	3.76047	4.22071	3.77673	4.38841	3.76507	4.07878	4.31178	3.95551	3.79452	3.85756	6.2265	4.33302	3.75345	4.03469	4.20014	6.29863	3.89624	3.5672	6.32106	4.35407	4.2312	4.36342	3.88681	4.10463	3.49802	4.47081	5.43281	4.17016	3.65417	3.88565	3.93706	3.45838	4.38609	4.83526	3.92487	3.5474	4.09827	5.16268	5.04129
ANK2	11.9224	10.9803	9.01153	10.5996	10.6823	10.5625	9.83951	9.99662	11.1763	9.87836	10.3394	10.8587	9.798	10.2319	10.1709	10.4608	10.6314	9.27576	10.3631	10.6335	10.9258	10.2057	9.90394	10.2969	10.7293	10.762	10.1585	10.4216	7.34734	9.42426	11.1294	10.3452	8.02735	9.37125	8.93164	8.6165	10.7805	9.17372	10.3135	9.62778	10.7423	9.90528	10.1412	9.72877	9.37436	10.3135	7.8312	9.4827	11.7066
ANK3	9.87622	10.1049	9.36522	7.91593	8.8923	9.05852	7.21072	9.70329	8.0139	9.01982	8.48325	6.72417	8.11192	5.84801	7.78345	2.87217	7.45533	4.91006	9.12796	9.13238	9.68035	9.71136	6.74403	7.99885	7.70635	7.68706	9.15643	7.5678	9.76858	8.69354	6.27535	8.79988	3.84241	9.52417	7.92562	9.04477	10.1216	8.38973	8.97683	8.38107	10.0618	7.60877	9.34056	8.67691	7.35036	7.33362	9.17679	9.48902	10.5383
ANKAR	2.73518	2.61522	3.08161	2.70635	2.85988	2.69323	2.64868	2.82912	3.10601	2.86109	2.92309	2.83193	3.14633	3.33497	2.86803	2.67219	2.72295	3.14469	2.95412	2.86596	3.77748	3.01784	2.72257	2.88184	2.65311	2.90773	3.01285	3.02637	3.02697	2.65538	2.87523	2.39693	3.3572	2.80918	2.71539	2.70242	2.76186	2.68535	2.87753	2.76189	2.97518	2.83043	2.73081	2.94783	2.68593	2.63458	2.82113	3.00447	2.91151
ANKDD1A	7.55289	7.0155	7.59559	7.08806	8.07528	7.07275	6.80308	7.42743	9.53339	6.7321	7.33401	7.47341	6.38722	6.93509	7.00748	6.3316	7.8719	6.38906	7.85571	7.7452	8.84916	7.16378	7.43197	6.08115	8.2853	7.34	6.72858	7.29763	7.72405	7.6247	7.7613	8.41458	8.90077	5.76488	6.23178	5.34415	7.18073	5.81354	8.76734	8.62845	7.97667	8.03978	6.5403	6.97597	6.73293	8.71899	5.67213	7.41053	8.35718
ANKFN1	6.38008	4.77919	5.99108	4.87941	4.50631	6.28064	4.20501	5.01694	8.33422	6.00591	4.99174	5.30944	6.11841	5.83117	7.21688	5.17692	3.80058	6.52915	4.84633	4.45922	6.73894	3.43508	5.86071	4.24558	5.61524	3.26431	4.38274	5.73964	5.86758	5.11443	4.71149	6.97951	4.84962	3.81537	5.24693	5.12085	4.13154	4.56838	5.11655	3.43782	5.11747	3.70595	5.21592	3.15903	3.09932	6.88271	5.57237	5.40032	6.46351
ANKFY1	6.95239	5.1232	5.00622	5.56384	5.01474	5.82524	5.40854	5.74892	6.71152	5.8116	6.20141	5.82326	5.7066	5.8457	5.7407	5.52448	5.29012	6.06475	5.97634	5.58636	5.98216	5.74729	4.9865	6.08186	6.08259	5.12716	5.27725	5.1412	5.28511	6.32972	6.41157	5.8256	5.93405	6.3527	6.5942	6.01289	6.21306	5.69654	7.4241	6.75106	7.14409	6.17027	5.76231	6.27608	6.43077	7.49781	5.77461	5.84797	6.15827
ANKH	10.1105	9.41672	10.421	10.0991	10.2771	8.20293	9.16488	8.44396	7.58805	9.51393	9.00694	9.55869	9.13114	9.16715	9.84411	6.52172	9.87418	9.06831	10.825	10.1711	10.2686	7.18643	10.4917	9.6387	8.5458	11.6119	10.506	6.65234	10.8752	9.89243	10.6325	9.68661	7.11007	9.4109	9.84616	9.62246	9.85242	9.29817	10.3459	10.4278	9.70803	7.47811	10.0727	7.75127	9.48695	6.51167	9.37255	8.87427	9.44725
ANKHD1	4.48527	4.93374	6.47836	4.45719	4.38996	5.78855	6.92851	4.56096	6.55965	4.8256	4.93818	4.53532	4.17341	4.57523	5.1063	4.82281	6.28501	5.39875	4.9735	4.88478	5.97762	4.93257	5.1193	4.89846	5.03654	5.42075	5.59057	5.01683	5.04571	4.62266	5.61986	5.5067	6.98947	4.29553	5.39274	5.09475	4.56096	5.27313	5.20114	5.2411	4.52074	5.07353	4.47042	4.90664	5.24395	4.85661	4.64431	5.54638	4.14285
ANKIB1	5.36546	4.79251	4.22523	5.04212	4.89423	4.96126	4.11714	5.1613	4.80732	5.11957	5.03197	4.52888	5.15358	9.2978	4.85953	4.11811	4.31906	4.37248	5.04187	4.98313	4.43877	4.62447	4.46708	4.68778	4.31034	4.90026	4.37205	5.00239	4.17063	4.35898	4.15884	4.10869	4.46865	4.22815	4.48153	4.72107	4.22157	4.27959	4.41928	3.96244	4.78599	4.5831	4.19808	4.51534	4.75483	4.52023	4.92759	4.38297	3.90455
ANKLE1	3.31128	4.72239	3.76243	3.62414	4.31672	3.93319	3.80135	3.83458	3.70174	4.18552	3.53776	3.57413	3.93128	3.65014	3.38595	3.92183	3.49669	3.75067	3.33862	3.42148	3.69134	4.15123	3.84413	3.54661	3.7346	3.66024	3.69788	3.78179	3.40656	4.00274	3.7664	3.82882	4.10099	4.18586	3.65283	5.02491	3.98312	4.07001	3.76766	3.62539	3.68312	3.99642	3.7583	4.25532	3.9097	3.7447	4.30585	3.93716	3.9112
ANKLE2	8.06948	7.18449	6.68661	6.99839	7.75138	7.98532	8.06724	7.71312	7.39545	7.27439	7.90218	6.527	7.18888	7.20035	6.9716	6.9435	7.56273	6.97116	6.57982	7.09501	6.92245	7.46945	7.70078	7.6823	7.4997	7.71606	6.97697	7.70196	7.56862	6.56191	6.88676	7.08771	7.39772	6.4671	6.76965	7.16472	7.05628	6.83218	6.2298	6.58057	6.22867	7.34061	6.74975	6.85991	6.65003	6.56344	6.89929	7.28656	6.02606
ANKMY1	4.69951	5.15894	4.92942	4.49763	4.47334	4.89817	5.01139	4.93214	5.05829	4.75332	4.94654	4.92266	4.70194	4.97697	4.81687	5.0826	5.07619	4.79712	4.92294	5.01483	4.94799	4.85898	4.88014	4.67516	4.96705	4.94692	5.22966	5.51537	5.58188	4.77303	5.20947	5.06741	6.28966	5.15058	5.05125	5.7944	5.20652	5.12267	5.08844	5.41799	5.23258	5.29299	5.38012	5.52821	5.68083	5.08118	5.37978	5.41116	4.85699
ANKMY2	9.47715	8.41736	8.05424	9.49801	8.93283	8.43528	8.14966	9.18515	8.96205	9.08846	9.0826	8.94883	9.47549	9.45132	8.80496	8.61921	8.81552	9.5498	9.42024	9.20919	8.54879	9.24928	9.03531	8.36054	9.29894	9.45489	7.83827	8.1422	7.85818	9.89202	8.64289	8.87617	8.48182	8.15097	8.81323	8.31902	9.22842	8.59012	9.03865	8.3079	8.88844	8.83632	8.45663	8.86374	8.80792	9.00968	9.31017	7.98536	8.96727
ANKRA2	7.48805	7.95412	7.61942	7.46695	7.72229	7.42389	7.15551	8.35248	7.97718	7.89895	7.78342	7.61196	7.88199	8.03406	8.66399	7.16247	7.78815	8.44926	8.29679	7.45463	7.3677	8.09844	7.46341	8.30736	8.40671	8.73604	7.32684	6.1233	7.53335	7.73243	7.76239	7.92955	7.20255	7.9569	7.69146	7.40788	7.24181	7.061	7.68905	8.08929	7.48231	7.30492	6.72292	6.88159	7.00154	7.99362	7.562	6.68537	7.40441
ANKRD1	2.88543	3.11924	3.122	3.55772	3.00992	2.89665	3.67576	3.26903	3.29341	3.10979	3.67974	3.04475	2.92528	2.97395	3.28203	3.66341	2.87214	3.01127	2.77961	6.86257	3.36621	2.99026	2.90814	3.34379	3.05958	3.00981	3.09216	3.12717	2.88667	2.8705	3.20106	3.1027	2.98574	3.04195	3.02786	3.15231	2.91654	2.97671	2.98045	2.67955	2.8092	2.90143	2.82596	3.12409	3.16612	2.93637	3.00041	3.06634	3.02512
ANKRD10	5.90459	7.43868	9.95045	9.05818	7.96414	8.11747	8.14966	9.76593	7.82849	8.36716	7.59398	9.87239	7.74709	8.72679	7.98567	7.60381	8.04685	8.54452	8.18593	8.99249	10.2663	7.78152	8.7141	7.73073	7.08275	7.44482	8.50338	8.75607	9.98099	7.79885	9.89944	10.4252	9.71593	9.99118	9.97815	8.97336	8.47146	9.42644	10.1564	10.1933	9.20711	9.41119	9.5353	9.3151	8.92418	8.47276	9.16394	9.29533	8.78493
ANKRD11	6.9021	6.71098	7.52574	6.66968	6.63074	6.72353	7.50075	7.26964	6.91623	6.88899	6.35296	6.52236	7.03969	7.03678	6.87176	7.28726	6.57093	6.23946	6.75094	6.99837	7.09549	6.97134	6.72226	6.76512	6.70357	7.02561	7.62666	6.13332	7.45033	4.8824	6.06782	5.79357	6.18472	5.53276	6.05418	5.68938	5.38361	5.60473	5.15159	5.56163	5.32525	6.09814	5.83463	5.30916	5.24727	6.08568	6.28765	6.10915	5.72822
ANKRD12	7.8009	7.99011	9.30748	7.35438	6.78407	7.36071	8.34738	7.7672	8.33614	7.74351	8.15837	7.04876	6.95597	6.56188	7.86029	7.43661	7.35562	8.22703	7.70426	8.36116	8.20494	7.24366	6.52437	6.9199	8.01261	7.70887	7.93857	6.58396	7.27515	8.19922	6.69857	6.3787	6.93672	5.66695	5.68203	5.83276	6.60455	5.78089	6.6596	5.82598	5.71492	6.64675	5.78127	5.82626	5.70688	6.76381	5.60855	5.64266	6.40195
ANKRD13A	5.79583	6.09778	6.47043	5.08878	5.07373	6.34227	5.927	5.77209	6.45569	5.06298	5.65914	4.93925	5.13082	4.29529	5.52981	5.17339	5.90482	5.46644	5.33625	4.8979	5.82357	5.1856	5.10818	4.59623	5.04907	4.6717	5.69445	6.18768	7.02166	6.64797	5.79444	6.05758	7.21141	5.21257	6.69307	5.64055	5.33165	6.04146	6.09196	6.58131	6.3194	7.66197	5.83829	4.93299	5.74191	7.68758	6.1926	6.05057	5.48567
ANKRD13B	5.46439	6.92873	6.01788	5.88714	5.85227	6.21469	5.4711	6.11226	5.93348	5.64682	5.38	5.27537	5.91105	5.85883	5.17086	5.87054	5.05037	5.60947	5.10695	5.53678	5.73787	5.80685	5.75942	6.09459	6.3648	5.10166	6.15988	6.61665	7.58288	7.0254	6.10502	7.18967	7.29374	7.19971	6.70646	7.15555	6.78996	6.85539	6.566	5.78048	6.65373	6.6549	6.23385	6.64551	6.6521	6.05404	6.23207	7.07274	6.48357
ANKRD13C	7.24111	6.5804	5.60585	6.75078	7.45664	7.14091	5.76515	7.80576	6.38705	6.60472	7.66626	7.37907	7.88514	7.62023	7.4845	7.0534	6.64915	7.02221	7.18238	6.79222	6.35069	7.30985	6.72327	7.13767	6.94699	6.50307	5.90125	5.90886	4.87274	6.5587	5.68559	5.10949	5.9467	5.99124	6.32723	5.07502	5.85265	4.78975	6.36412	6.76188	6.18255	6.16906	6.12268	7.12663	6.93827	7.43163	5.50571	5.25609	6.35898
ANKRD13D	6.00143	6.51822	7.62599	6.3897	5.97351	7.02529	8.84941	6.35031	7.7492	6.38049	6.56036	6.49235	5.8972	6.14452	6.42191	7.14847	7.18976	5.86324	6.32936	6.48799	8.25075	5.6955	6.10524	5.93851	6.30366	6.21538	7.63998	7.38882	7.55045	6.60659	7.57062	7.4999	8.10369	6.84161	7.37922	6.58176	6.3894	6.94592	6.52126	7.37192	6.75514	7.49879	6.6185	8.4898	6.47724	7.0395	6.96379	7.14868	6.72162
ANKRD16	6.00028	6.53193	5.20509	5.92412	6.72187	7.16073	5.82228	6.19634	6.00263	5.95667	6.46111	6.38418	6.00682	6.09519	6.26564	6.81621	6.2748	6.39499	6.45684	5.9417	5.50047	7.18822	6.35775	6.21455	6.71599	5.63503	5.29263	7.08719	5.90332	5.55378	5.56257	7.39589	5.90372	6.56993	6.36849	7.10185	6.66004	6.37608	6.06818	6.17898	6.18779	7.24658	5.37522	6.34865	6.42556	5.92733	6.16845	6.19494	5.90501
ANKRD17	8.05877	8.22896	7.63251	7.68872	7.83044	8.61108	7.87249	8.31743	7.93192	8.12457	8.20619	7.831	7.84968	7.63783	8.03388	7.52345	8.32997	8.00712	7.78991	7.93103	7.82253	8.57888	7.58746	8.32885	8.04147	7.75761	7.78603	7.51469	6.85708	5.28763	8.18366	7.18662	8.08964	8.44648	8.0997	7.84875	7.81955	7.41039	7.76114	8.52353	8.14719	7.61465	8.0318	7.44081	8.22081	7.5735	8.24198	7.4185	8.65746
ANKRD18A	2.98479	5.32943	3.21794	2.82327	2.99212	4.77886	4.60872	2.8408	3.70809	3.77236	3.05666	3.19021	2.93939	3.884	2.9197	3.41444	3.46522	3.55799	2.97039	3.06339	3.09881	4.55263	3.02718	3.52412	3.13405	3.35	6.92784	3.51929	4.26037	5.13434	3.63314	2.82708	3.49486	3.63732	3.43585	4.18695	5.85681	4.33978	3.0746	2.95038	7.0633	4.42862	5.354	5.29299	3.3396	2.55967	2.84467	3.38052	3.97013
ANKRD19P	5.16276	5.06101	5.23523	5.03456	5.22612	5.21345	5.87654	4.99604	5.27539	5.34254	5.05507	5.24235	5.24053	5.12407	4.84612	5.42179	5.00336	5.35436	5.09342	5.16604	5.19905	5.15138	5.16415	5.44234	5.29188	4.99119	5.28985	5.05779	5.9218	5.29711	5.17201	5.65059	5.75179	4.90145	4.87907	5.36806	5.5911	4.9671	5.41192	4.769	4.75768	5.00574	5.03098	5.05454	4.88232	5.14572	5.42853	5.09846	5.2772
ANKRD2	3.48811	3.77021	4.1851	3.68791	3.95051	3.91041	3.60066	4.11656	3.8642	3.89271	3.92573	3.60013	3.81953	3.90121	3.91948	4.23354	3.75735	4.00459	4.1158	3.77681	3.86491	4.02877	4.06714	3.99174	3.93284	3.92161	3.96559	4.36524	4.52246	3.68088	3.91769	4.17818	4.53283	4.37552	3.80236	3.8203	4.20698	4.36903	3.85217	3.31636	4.036	3.87266	3.87325	3.66002	3.89862	3.90234	4.33092	3.77807	4.4252
ANKRD20A11P	5.89439	8.13833	7.56408	6.73435	7.61264	6.82654	6.77121	6.85073	7.73105	7.43287	7.40326	6.54712	6.8151	6.45262	7.10585	6.63769	7.49035	6.82822	7.43719	7.01651	8.29229	7.53155	8.09565	6.45889	6.27706	7.08859	6.68538	7.1175	7.59279	8.80064	6.76767	7.70895	6.42191	7.13187	7.90082	8.82515	8.29819	8.83723	6.851	6.18935	6.7829	7.16538	8.02063	9.00025	7.76669	7.97202	6.43236	8.33302	7.75246
ANKRD22	7.25988	4.54019	5.25438	6.29296	5.28105	5.14881	3.98034	3.26553	5.23645	5.52622	3.82249	7.05959	4.75692	6.00949	6.02773	4.64203	5.3562	4.71605	6.09299	6.69083	4.96249	3.57523	5.67951	3.96101	4.79498	5.30929	5.55009	5.13959	4.54981	4.19036	4.49463	5.33582	4.02589	5.39239	5.09359	5.96785	5.5721	5.00006	5.5542	7.1587	5.44344	4.31854	6.14699	3.98446	4.76188	3.73888	5.31533	4.46881	4.91834
ANKRD24	4.52599	4.94919	4.52934	4.60306	4.52005	4.38749	5.08491	4.81473	4.69536	4.31109	4.33895	4.3269	4.43382	4.48048	4.47786	4.93634	4.69959	4.63917	4.33379	4.71212	4.80647	4.50694	4.63718	4.9471	4.51289	4.42712	4.93338	5.26798	5.03696	4.65854	5.08231	4.74756	5.06166	4.65371	4.74435	4.81574	4.71322	4.74404	4.32363	4.46496	4.66782	4.81421	4.45955	4.39977	4.65952	4.66216	5.0308	4.65284	5.18533
ANKRD26	5.90802	4.49003	4.15671	5.04272	5.74234	5.02089	4.21581	5.89516	5.32965	5.03023	5.77242	4.50649	5.61947	5.35456	5.10632	4.71017	4.90085	4.82551	5.56821	4.85426	5.58355	5.75539	5.56394	5.46749	5.83425	4.35853	4.57802	4.63275	4.25806	5.23617	3.44608	4.87574	4.55757	4.72721	4.88398	5.5527	5.11318	4.56107	4.62688	4.5341	5.0132	5.65857	4.61203	3.88343	4.61086	5.27166	4.59578	5.06684	5.436
ANKRD26P3	3.55103	3.59019	3.80724	3.61419	3.81151	3.43375	3.5648	3.52601	3.77641	3.47998	3.91003	3.80323	3.51612	3.60427	3.78524	4.0055	3.85671	3.6803	3.52777	3.51431	4.0728	3.81863	3.5591	3.78179	3.5471	4.01701	3.55297	3.83664	4.39404	3.5661	3.82492	3.36115	3.5471	3.61532	3.48152	3.52291	3.83177	3.4156	3.46469	3.65279	3.44551	3.64778	3.51083	3.55641	3.62434	3.55305	3.42119	3.78583	3.69594
ANKRD27	8.46782	7.99695	7.57696	8.20159	7.5202	8.45913	8.18329	8.69667	7.87807	8.45399	8.02228	8.53351	8.28858	8.44082	7.86752	7.95733	7.42517	8.33817	7.64865	7.90942	7.50885	8.08356	7.16905	8.47121	8.62894	7.73837	8.26895	6.02888	7.69007	7.46689	7.68505	7.22919	7.45356	7.33646	7.12852	7.65365	7.68637	7.38872	7.10637	6.61421	7.82879	7.85394	7.3986	8.83054	7.2763	8.0276	8.23857	6.95934	7.96859
ANKRD28	5.10915	5.60877	7.2051	5.36198	5.8029	5.91059	6.63531	6.56331	7.27173	4.9242	5.62136	5.2262	6.06953	5.07031	5.66597	6.69652	7.12262	5.92074	7.62166	6.99903	7.40378	6.52377	6.77768	5.72102	5.98974	6.55749	6.85308	6.58777	6.39329	7.41153	7.243	6.67554	6.03096	6.6064	5.7335	6.27	6.80714	6.23749	6.6542	7.51224	8.11682	7.49478	7.62543	5.11034	6.79455	8.68332	6.57402	7.94935	8.22194
ANKRD29	4.05957	5.30438	3.3024	4.13388	4.93883	3.12992	4.07338	3.11886	3.06583	3.20921	3.16225	3.44681	3.03848	3.62781	4.19334	3.45704	3.82654	4.49799	3.775	4.03664	3.38835	3.56515	3.06052	3.50107	5.14052	8.36606	3.64224	3.72512	3.23249	5.25034	4.96063	4.45882	2.80053	4.36323	3.12871	3.38955	5.93309	4.35591	4.04584	3.45132	5.33427	4.66027	4.29754	3.87412	3.13932	2.94665	4.93647	3.3559	5.44022
ANKRD30A	3.24118	3.44335	4.00281	3.64596	3.19942	3.32603	3.54558	3.23068	3.33277	3.31	3.3317	3.35058	3.20663	3.23701	3.18238	3.36095	3.31208	3.28107	3.11289	3.264	3.28002	3.41334	3.45297	3.57291	3.24851	3.19638	3.31984	3.16361	3.46862	3.26591	3.27331	2.94376	3.18985	2.96996	2.95853	3.06283	3.01002	3.00739	3.41055	3.09016	3.25187	2.88375	2.97696	3.14511	3.21469	3.16177	4.09105	3.46149	3.26431
ANKRD30B	3.50577	2.52194	2.40379	2.6814	2.90698	2.3547	2.3859	2.39756	2.34071	2.4004	2.38058	2.43549	2.39568	2.45925	2.30516	2.54168	2.64234	2.42919	2.45805	2.29635	2.55451	2.42534	2.28199	2.23757	2.30103	2.6029	2.5332	2.70101	2.49645	2.3717	2.27576	2.57647	2.58674	2.5847	2.68002	2.58787	2.49259	2.52698	2.33553	2.43691	2.31135	2.39599	2.30546	2.58674	2.52539	2.83266	2.41842	2.26092	2.77689
ANKRD30BP2	3.11944	3.46694	3.33594	3.31759	3.45158	3.23155	3.27131	3.19557	3.50611	3.61084	3.4515	3.2376	3.22566	3.35794	3.13084	3.15885	3.34688	3.47634	3.18114	3.54271	3.3579	4.38156	3.26665	3.42351	3.16905	3.25304	3.0499	3.50012	3.2456	3.10693	3.16846	3.10169	3.27855	2.95769	3.33742	3.21875	3.20787	3.21478	3.06153	3.32606	3.14765	3.00539	3.08367	3.04395	3.16253	3.16138	3.43466	2.92025	3.17955
ANKRD31	3.47066	3.49434	4.17394	3.31744	3.27841	3.5337	3.62072	3.63616	3.27164	3.64328	3.3761	3.50348	3.69213	3.62612	3.55878	3.61233	3.70052	3.7577	3.16498	3.32161	3.25559	3.41191	3.30296	3.24745	3.34325	3.56065	3.29676	3.35924	3.27851	3.31464	3.16799	3.39561	3.61038	3.11245	3.20394	3.50603	3.26589	3.10671	2.81408	2.97138	3.11028	3.25454	3.252	3.19233	3.3655	3.32769	3.39986	2.99244	3.50707
ANKRD32	8.23561	7.24441	5.44914	6.63483	5.9849	7.72392	6.9886	7.58314	6.87301	7.46215	5.69105	6.22221	7.33643	6.76579	7.1913	6.26728	7.29297	8.2495	5.73714	6.21481	6.16505	9.28802	6.41614	7.81367	7.59639	7.24206	6.23017	5.67654	4.83451	7.1578	6.46073	5.40974	6.6222	7.35644	5.72908	6.63845	6.82235	5.60965	6.60506	5.4775	5.86733	7.65875	5.89014	7.25439	6.52046	7.22645	7.01699	5.64054	7.66696
ANKRD33	3.41707	3.86519	4.0839	3.43215	3.70717	3.30285	3.26605	3.63914	3.44243	3.38764	3.32227	3.09778	3.68588	3.4283	3.30516	3.45094	3.28425	3.66706	3.44798	3.30192	3.98411	3.47571	3.2543	3.71944	3.11922	4.32569	3.45262	3.57886	3.30204	2.7011	3.33187	2.73918	3.32371	2.86305	2.91681	3.02115	3.09827	3.06174	3.39869	3.493	3.12215	3.34826	3.06988	3.11116	3.07846	2.75594	2.95057	3.21121	3.17064
ANKRD33B	5.45068	5.64979	5.33227	5.42493	5.90898	6.16339	7.73643	5.17432	5.53369	5.23258	6.35164	6.36082	5.92274	5.98774	5.5631	6.64246	5.89015	5.59233	4.95093	6.04775	4.86148	8.70815	6.59287	5.38284	5.41037	6.21246	5.98071	5.43403	5.35342	5.5749	5.29863	5.1431	4.63212	5.29154	5.34328	4.92231	6.54411	5.21576	5.06729	4.85764	5.35394	4.9253	5.12679	5.10722	4.84306	4.95747	5.38391	5.36572	6.68388
ANKRD34A	4.72788	6.90365	5.98963	4.83919	5.02574	5.10022	5.06812	4.9053	4.91732	5.15779	5.74283	4.98657	5.05904	4.89622	5.00908	5.51681	5.66148	4.5597	5.37642	5.32347	5.81884	4.51625	5.1281	4.78243	5.17988	5.09194	5.2154	4.56479	6.55311	5.26212	4.75715	4.85409	4.64664	6.72665	5.80157	6.35204	7.2791	5.34134	4.82875	4.53275	5.63855	5.02316	5.04436	4.83807	6.05249	4.35076	5.53367	5.45946	6.90493
ANKRD34C	3.24914	3.10823	2.94027	3.11539	2.92645	2.96717	2.9481	2.98748	3.05612	3.12308	2.96641	2.98894	3.10671	3.04275	2.92608	3.63111	4.11118	3.23609	2.90324	2.92954	3.05812	3.1533	3.14376	3.24776	3.13542	3.08003	2.96146	3.34187	3.12511	3.4039	2.99001	2.76253	3.30773	2.97964	3.18511	3.04468	4.28071	2.95779	2.84976	2.87135	3.02341	3.00539	3.01584	3.07593	3.06261	2.89967	2.92717	3.27813	4.5932
ANKRD35	8.0727	4.84982	6.70651	7.31125	7.82426	7.02505	6.56596	5.88773	5.66693	4.9569	4.56119	7.74323	5.99972	8.15054	6.29705	6.01461	6.0746	7.13326	8.07389	7.2779	8.01709	4.34821	5.65247	6.82673	6.80542	5.11895	6.42082	5.89682	6.03546	5.58297	4.77849	7.6359	5.39667	6.44634	5.41232	5.24473	6.58005	5.47133	7.49742	5.76615	7.55927	5.20238	5.22694	6.16983	4.82253	6.48927	4.00509	4.90664	5.95278
ANKRD36	7.34358	8.77593	9.60931	7.68537	8.4574	8.07879	9.46235	8.49215	8.51533	7.59459	7.52057	8.27004	8.27051	7.72562	7.79252	7.26545	7.69409	8.07665	8.01817	7.62151	8.71899	8.50726	7.9906	7.24522	7.93727	6.76922	8.707	6.78505	7.64078	6.87228	6.97878	6.69777	8.10942	7.23133	6.0083	6.59922	6.53105	6.30391	6.99775	7.16964	7.29892	8.26119	7.60266	9.43393	6.97579	7.33815	6.73321	8.41865	7.51433
ANKRD36B	8.3169	10.6185	11.2818	8.48743	9.06584	9.86252	11.0555	8.71911	10.2265	9.21939	9.23283	9.94501	8.40029	9.00486	8.95711	9.13578	9.59202	9.75514	8.65905	8.51755	10.1838	9.16044	9.29199	9.00182	8.62475	8.0627	10.3804	8.61111	11.1267	8.325	10.3299	9.41496	10.2287	10.3915	8.93702	9.67817	9.35784	9.04464	8.5573	9.52273	9.03416	9.02228	9.33697	11.6678	8.95205	8.32847	8.08329	9.5981	10.0054
ANKRD36BP2	4.44142	5.88016	2.38233	2.88979	3.0546	2.41988	2.623	2.57318	2.3929	2.43239	2.58425	2.79617	2.9129	2.75359	2.61039	2.52251	2.88517	5.70839	2.53457	2.90774	3.72021	3.40969	3.11284	2.49621	2.39034	2.41443	2.5071	2.47692	3.85117	5.62317	2.1363	2.45631	3.05687	2.46704	2.73961	3.94338	3.26182	2.40969	3.3118	2.76983	2.48408	3.09112	2.76196	4.51747	2.50166	2.92898	2.7254	4.18242	3.36489
ANKRD36C	4.1556	5.40627	4.26278	3.91281	4.06014	5.05761	4.56618	4.06134	5.39663	4.44247	4.71582	4.82866	4.26904	4.41723	3.82946	4.16617	4.51361	4.47031	3.9571	3.9332	4.85528	4.31535	5.03948	4.46056	3.97178	4.23951	4.97393	4.39476	5.10645	3.84454	5.01414	4.91507	5.25999	5.71143	4.85975	5.45886	5.18769	4.55843	4.60497	4.54127	4.64395	4.58161	4.55512	7.41719	4.52516	4.31184	4.01912	4.74435	4.98128
ANKRD37	6.83441	5.31357	6.36455	7.37917	6.3841	5.73644	6.62352	6.9877	6.29229	6.41015	7.01877	6.00248	6.52435	6.97343	6.82623	8.09283	6.47547	9.61086	6.01486	7.8929	5.41185	7.20624	7.18932	6.15435	6.70385	7.98579	6.36661	5.70385	5.73886	8.13478	6.34794	6.74997	6.42928	6.43105	6.98055	6.05768	6.36124	5.91918	6.08164	5.65526	5.93971	6.44703	6.75791	6.84009	6.3774	7.29458	7.88665	6.57946	7.28339
ANKRD39	6.13892	7.30601	5.81396	6.11592	6.48518	6.49988	5.88175	5.12894	5.47366	6.35239	7.05968	6.70609	5.71761	6.97627	5.87739	7.03638	6.5219	6.05279	5.77409	5.66683	5.69166	6.62748	6.8329	7.01161	6.4215	5.95305	5.89711	7.20567	6.33509	6.26332	6.18177	5.37439	5.84246	5.88827	6.472	6.2801	6.25336	6.08123	5.53102	5.81425	6.26049	6.3616	6.26237	6.83115	6.72069	6.0073	6.41996	6.19882	6.02629
ANKRD40	9.56254	8.01189	8.52646	8.72488	8.7368	8.86232	8.63086	8.5257	9.22188	8.77875	8.5246	8.58039	7.74417	7.89539	9.37376	8.07946	9.6641	7.6375	9.8389	9.32703	9.40832	7.93155	8.32201	8.70053	8.38594	8.23876	9.7592	7.61009	7.97675	7.91527	8.29689	9.20337	8.12179	7.8285	8.21384	8.28545	8.32567	9.02714	8.99509	7.39846	9.61375	7.22602	8.39687	7.18396	8.41043	8.70029	7.76915	7.86038	8.69359
ANKRD42	3.8637	3.90023	4.3074	3.91811	4.01915	3.69541	4.50957	3.87289	4.07973	3.93311	3.7691	4.00529	3.72823	4.30825	3.60384	4.22622	4.0366	3.77858	3.8875	3.83821	4.10779	3.98716	4.13157	4.06753	3.91803	3.78031	3.95758	4.26927	4.38732	4.52106	4.3757	4.94574	4.08476	4.61449	4.24173	4.27022	3.76177	5.04655	4.01685	3.80122	4.11673	3.74513	4.0847	4.07289	4.37741	4.28856	4.33345	4.26891	3.74463
ANKRD44	8.51543	8.26535	8.56118	7.7214	8.06747	7.63322	7.81384	8.09424	8.54962	7.76124	8.37887	8.71339	7.59963	7.43554	8.82789	6.26285	8.08088	6.25868	9.03607	8.24666	8.88227	6.0733	7.83983	6.80942	7.67272	6.79744	7.85567	6.92583	8.05934	6.56302	6.37513	7.79418	6.91051	6.52878	7.37502	7.65951	6.78711	7.13698	7.71817	7.92047	8.24948	6.27946	7.801	6.79619	6.33472	7.15209	6.06474	7.86669	8.06513
ANKRD45	6.03194	4.59925	3.65823	4.96801	4.28281	3.22557	4.09029	3.52821	2.79806	4.04207	3.10761	3.59295	3.58253	4.49967	4.64207	4.2837	3.60835	7.1314	3.14234	3.16867	3.24454	5.57573	4.15771	4.50942	5.67812	3.72962	3.30138	5.52549	3.55693	4.03472	3.76686	3.48902	3.28751	3.82131	3.25094	4.03209	3.91677	3.80844	3.21736	4.45915	4.24267	3.2602	3.67749	5.14382	3.45054	3.19188	3.89387	3.72851	3.34367
ANKRD46	10.1508	9.63206	8.15927	8.96514	9.10008	7.52668	6.14382	9.19526	8.25577	8.63234	8.70414	8.52652	8.68086	8.67297	9.27219	7.60761	7.99431	8.89412	9.44607	8.55102	8.62191	9.28542	8.2387	8.2827	9.06718	7.74826	7.93796	6.24054	9.05907	9.49523	7.53001	9.03764	7.81382	8.28018	8.55383	8.20833	9.19691	8.47534	8.91053	7.57016	9.00851	8.9649	7.70899	7.2319	9.29506	8.51714	6.55301	7.54492	9.62405
ANKRD49	8.08692	7.00248	7.52954	7.91911	7.54219	7.75346	7.53561	8.83594	7.67895	8.28292	7.2417	8.31758	8.20474	8.10363	8.09639	6.88181	7.06421	8.31987	7.53342	7.69146	7.15283	8.30261	8.03075	7.87053	8.32965	7.76306	7.38765	6.5828	7.57521	7.64108	7.1128	8.3533	7.22522	6.92766	7.64797	7.04897	7.31657	7.00015	7.49931	7.2955	7.36749	7.63736	7.42172	8.89157	7.73647	7.72201	7.55541	7.25712	7.07702
ANKRD5	4.74164	5.07044	3.91399	4.05492	4.41035	3.51696	3.76979	3.57531	3.61186	4.52914	3.71308	4.74083	4.48386	5.11686	3.66474	3.92764	4.19123	5.93111	3.88322	4.09482	3.6845	4.62813	3.94499	4.15565	6.28613	4.2838	3.96913	3.4784	4.54477	3.93208	3.87199	4.02843	3.35543	4.04242	3.54293	4.37286	3.75481	3.9407	3.78745	3.37183	3.65712	3.58896	3.68092	4.75185	3.71949	2.78821	5.1801	3.78004	3.98316
ANKRD50	7.69583	7.22238	5.14664	6.74016	7.26334	7.16289	5.97539	8.8154	6.09032	6.78453	7.51173	7.10803	7.60222	6.75209	6.44092	5.45812	7.75451	6.64209	6.53833	6.61928	6.94295	7.96922	6.5752	7.6081	6.33966	5.95878	6.35537	6.82144	5.90904	5.83448	5.74524	6.15654	7.00325	6.63011	6.83688	6.67271	6.35312	6.56076	6.69599	6.8451	6.19758	6.9878	6.9533	7.763	6.72517	5.33887	5.55364	6.20236	6.0544
ANKRD52	6.74551	6.5095	6.8716	6.70106	6.6559	6.88754	8.04403	6.91687	7.29215	6.96415	6.71168	6.48066	6.76064	6.51103	6.30342	7.23684	6.89791	6.38218	6.20691	6.63183	6.88796	6.30886	6.795	6.68905	6.29579	6.61226	7.07227	7.59456	7.52167	6.36526	7.08666	7.37593	7.37429	6.77474	6.93611	6.77677	7.0136	7.02614	7.21424	6.60178	7.15647	6.78038	6.97209	7.0013	6.57566	6.63711	7.18464	6.89627	6.87046
ANKRD53	5.30411	5.50369	5.29871	5.34106	5.24534	5.33352	5.37307	5.36222	5.52275	5.07611	5.30709	5.56574	5.17313	5.23551	5.28828	5.63277	5.46066	5.56116	5.4996	5.18398	5.68096	5.6312	5.55198	5.50741	5.75353	5.35551	5.47107	7.33858	6.63357	5.54678	5.66344	5.72394	5.74537	5.77693	6.10623	5.61285	5.24452	5.60656	5.14679	5.53618	5.76196	5.64323	5.99627	6.0787	5.83998	5.87286	5.99803	5.9959	6.0513
ANKRD54	7.56118	7.30601	6.99902	7.01173	7.20827	7.17986	6.86544	7.05394	7.51006	7.3579	7.15437	6.59873	6.71745	6.98498	7.01877	7.13734	6.90096	6.94534	7.45603	6.82266	7.12562	7.37151	7.30996	6.87724	7.71472	7.0612	6.85069	7.32896	7.04071	7.32057	6.92952	7.42027	7.54816	7.57018	7.22512	7.51408	7.29691	7.45622	7.15499	7.10375	7.07154	7.35399	7.23531	7.04144	7.22113	7.15668	7.0442	7.44736	7.25061
ANKRD55	3.88638	6.47595	3.51855	3.72493	4.27368	3.40045	3.43597	3.32627	3.58519	3.39661	3.55219	3.65921	3.6362	3.30569	3.58629	3.59304	3.6111	3.20909	7.13719	4.49768	5.25314	3.41595	3.81954	3.37804	3.6583	3.50808	3.35399	3.63074	3.93013	4.24687	3.32544	3.43344	3.40045	3.58176	3.6012	4.02863	4.09248	4.08024	3.32284	3.22252	3.79768	2.98653	3.59923	3.37606	3.48082	3.1277	3.62883	4.3061	4.18745
ANKRD6	8.1383	7.1428	7.07428	7.92707	7.78677	7.94797	7.01682	9.01995	9.23626	8.05075	8.18707	7.91532	7.51918	8.78557	8.6821	5.2813	6.26912	6.73816	6.82517	6.92401	6.91641	9.85838	6.83745	6.28163	7.0581	5.73521	6.12368	8.49707	6.95567	7.3218	5.20724	8.77125	8.2385	6.29239	7.18443	5.94299	6.83864	5.78326	7.73393	6.51402	6.99595	7.65315	7.29658	6.4343	5.02236	8.54964	3.58672	7.66078	7.7408
ANKRD60	3.71666	3.91955	4.14887	3.86831	3.62498	3.8897	3.95361	3.92686	3.57477	3.95996	3.78672	3.93251	4.04389	3.95552	3.81446	4.36533	3.88003	3.84973	3.61394	3.83374	3.78037	3.76974	3.85148	4.15844	3.68321	3.83287	4.3041	3.90002	4.22367	3.34305	3.81251	4.01311	3.85839	3.69159	3.64964	3.46039	3.54896	3.69971	3.41369	3.76768	3.70394	3.91224	3.81006	3.81007	4.04918	3.81577	4.21753	3.84418	3.75732
ANKRD65	4.85177	4.82195	4.97645	5.23164	5.0277	4.87951	4.98845	4.69574	4.65815	4.89722	4.59478	6.02868	4.98652	5.6729	4.90215	5.51025	5.29855	5.20509	5.57106	5.01547	5.20831	4.5094	5.01172	5.12248	5.33102	4.85043	5.60665	5.13605	5.62439	5.02173	6.22885	5.41197	4.81243	5.72723	4.75527	5.03582	5.67121	5.44736	5.33163	5.56296	6.57207	4.82024	5.12144	5.0459	4.93953	4.88726	4.81969	5.23031	6.00679
ANKRD7	3.86611	3.14494	2.75114	3.02875	3.02388	3.24081	3.37471	3.03909	2.54452	3.58491	3.17173	3.34458	3.17543	3.19888	2.94988	3.32603	2.76991	2.93505	2.64074	2.96059	2.73693	3.0613	2.6897	3.07923	2.92721	2.97485	2.63179	3.16543	3.55319	2.89174	3.20161	2.72235	3.11769	2.47324	2.87968	2.99126	3.03709	2.80793	2.90468	2.82186	2.85507	3.41378	2.7977	3.45663	2.99802	3.06487	4.21598	2.84424	3.14494
ANKRD9	6.39328	5.90391	6.35241	6.45428	6.29374	8.84281	9.43326	6.59322	7.97266	7.3489	8.26712	6.89973	6.97056	6.91716	7.84373	7.94099	7.62407	7.34462	6.51858	6.72819	5.00358	7.05317	5.98528	7.32345	8.3045	7.0056	7.42317	8.88471	6.8186	6.77622	7.36602	6.83183	8.60382	6.61206	6.84198	6.07801	8.49855	7.20718	6.48461	6.84603	7.4548	7.69152	6.83723	6.40816	6.06048	8.34104	7.31156	6.38801	8.79443
ANKS1A	8.24084	8.86694	7.78334	8.1145	8.04321	8.48644	7.24709	9.44052	8.59533	8.17902	8.10245	8.31356	7.89494	7.78781	8.34416	7.20153	8.01098	8.51056	8.50803	8.64017	9.05299	7.87939	7.86481	8.05351	8.83521	7.56167	8.15707	7.40821	8.73133	7.992	7.80859	8.27806	7.93542	8.63824	8.48241	9.77836	8.75072	8.22683	7.62029	8.07735	8.89393	9.12077	7.81808	7.49531	7.72839	7.99207	8.11052	7.94831	8.47815
ANKS1B	7.37742	6.26039	6.08395	4.29002	7.40913	3.89159	3.81419	5.08036	3.51687	5.86116	5.24155	3.92502	6.17391	2.99416	4.65273	3.30253	4.96822	3.12528	7.30206	4.94444	5.2299	6.81541	4.23664	3.17149	3.72594	4.75542	6.14177	6.20736	7.15185	9.53473	5.59362	7.47082	4.56758	8.71406	6.92152	7.84832	9.06953	8.21449	8.61753	8.27774	9.42042	7.28727	9.20594	6.40575	7.35806	8.02114	4.36782	7.33437	9.29655
ANKS3	5.80348	6.14372	6.17634	6.07173	5.77953	6.47796	6.19326	6.26502	6.60206	5.87438	5.99331	6.23318	6.16661	6.36873	5.70761	6.51028	5.69277	6.03927	6.05751	5.84118	6.37764	6.25486	6.31811	5.89853	6.05575	5.82107	6.29854	6.79786	7.38556	5.57936	6.31708	6.76362	7.1315	6.58744	6.18842	6.32007	6.12751	6.37366	6.08389	6.01709	6.03543	6.71088	6.23966	6.19912	6.16097	6.10381	6.25561	5.96782	6.16392
ANKS4B	4.18324	4.0321	4.22278	4.07162	4.25638	4.07527	4.44048	4.06927	4.06976	4.19125	4.12797	4.32307	4.01859	3.97617	4.01153	4.25909	3.8676	4.33972	3.87052	3.85493	3.96737	3.78845	4.06927	4.20196	3.89123	4.19272	4.59541	4.09668	4.26939	4.07029	4.1482	4.21015	4.06549	3.91342	3.71551	4.06169	3.90294	4.24113	3.70429	3.69657	3.80043	3.69496	3.73204	3.4618	3.67868	3.81256	3.89267	3.80339	4.15613
ANKS6	6.92326	6.62043	7.16447	7.07845	7.62861	7.65894	7.02984	7.54603	7.88021	7.37573	6.84128	7.9197	7.03996	8.16892	7.24827	7.80802	7.02711	7.19646	6.87667	7.03506	7.55295	7.59792	7.33707	7.5731	6.48764	7.85848	7.51531	7.39216	7.75717	7.3429	7.0002	8.4022	7.73624	8.02428	7.20092	8.30345	6.96423	7.57315	7.03574	6.70635	6.80161	7.4696	7.13783	7.97657	7.11012	7.23658	7.05878	7.5494	7.00331
ANKUB1	5.40633	4.55997	4.76585	4.66843	4.50394	4.23513	4.81876	4.691	4.57238	4.45228	4.69679	4.73951	4.86521	5.53598	4.65307	4.57594	4.44824	4.51295	4.49798	4.55662	4.50811	4.5642	4.61054	4.61454	4.49639	4.59112	4.86601	4.77995	4.92231	4.44738	4.46638	4.34614	4.50543	4.21494	4.44666	4.59457	4.76956	4.7847	4.30598	4.23149	4.23014	4.6861	4.58222	4.57152	4.45369	4.42113	4.78332	4.56841	4.59467
ANKZF1	6.7046	6.90896	7.02644	6.30348	6.45065	7.30387	7.81124	6.95195	7.63508	6.84521	7.06563	6.91243	6.79395	7.23934	6.80503	8.30613	6.88472	7.02497	6.56947	6.54058	7.37959	6.74342	7.43108	7.00429	6.8148	6.80372	7.31599	7.99936	6.87866	7.14277	8.01786	6.67319	7.93411	7.12432	7.78266	7.04952	7.2053	7.05958	7.00391	7.21972	7.16206	7.5598	6.91223	7.89873	6.99344	7.71499	7.18779	7.6582	7.44137
ANLN	6.01292	7.82389	5.2393	7.77929	7.66919	9.68101	8.68673	8.60021	9.93281	9.04448	9.0521	9.17116	9.26066	9.3233	6.93815	7.96054	8.72659	7.7124	5.91716	8.12557	4.14576	9.2675	8.28254	8.73769	6.58855	9.19571	10.5976	9.03179	5.31008	6.72887	7.01193	4.81405	8.73446	7.52502	7.4911	8.45014	7.06395	9.60705	6.69997	7.68538	10.6152	8.89717	7.81237	9.5565	7.76035	8.68554	9.69293	8.01336	8.02441
ANO1	2.47794	2.45306	3.20775	3.59584	3.69845	2.57347	2.67104	2.7075	3.34092	2.79788	2.55662	3.1073	3.04764	2.58064	2.82989	3.14828	8.56766	2.83367	2.57818	4.99229	3.38838	3.78977	3.30561	3.03426	3.86528	8.76657	4.77086	2.72376	3.33387	3.08104	3.55923	3.36137	3.20638	2.82615	3.20977	3.07671	3.23548	2.73787	2.54508	5.38223	2.60063	3.1348	3.95207	2.67457	3.13	3.24218	3.73945	2.67288	2.70477
ANO10	6.36552	6.24443	7.00266	6.6647	6.59435	6.75795	6.40084	5.67441	6.10009	7.0278	7.60563	6.27886	6.2224	5.67078	6.37337	6.4282	6.57521	6.4667	6.46933	6.72842	6.79845	6.32502	6.8768	6.71223	6.65597	6.54064	6.59437	6.61313	6.98941	6.44376	6.61147	5.83189	6.06646	6.36791	6.64856	6.29672	6.92172	6.704	6.66997	6.1719	6.63904	6.45579	6.82022	6.002	6.6369	5.92125	7.81839	6.73455	6.37597
ANO2	3.62803	3.71155	4.04043	3.78634	4.24285	3.57478	3.89476	3.62535	3.9726	3.52272	3.47085	3.71827	3.7235	3.65888	3.93922	4.15379	3.89578	3.9157	4.77427	4.31087	4.61729	3.56902	3.70916	3.69067	3.71788	3.82093	4.692	3.78179	4.06439	3.71101	3.72879	3.86668	3.87043	3.78265	3.48179	4.06456	3.93582	4.01603	3.95913	3.7235	3.88901	3.65727	4.08484	3.38799	3.58189	3.43717	3.7572	3.8054	3.89603
ANO3	4.61726	3.72597	3.61978	3.92493	4.67672	3.35744	3.64203	4.09516	3.50786	4.58068	4.85117	3.45648	3.46905	3.3255	3.68419	3.41702	4.51576	3.6188	5.62264	3.65866	3.91126	3.21296	6.12103	3.38715	3.54991	3.95701	3.64049	3.59189	3.65379	6.80842	3.85676	3.35867	3.80218	6.79773	4.75799	6.77391	9.0089	4.45414	5.11151	4.10694	9.2551	3.34721	5.98648	3.8902	3.7849	3.37579	6.72849	4.01478	8.90833
ANO4	5.93081	3.18781	5.55287	3.94778	5.62444	3.62481	3.40632	3.26931	3.62134	4.29172	3.41758	4.09611	4.2748	3.10962	3.42377	4.28434	9.34829	4.61678	6.39992	5.13554	7.74521	3.25503	3.67917	5.30622	3.06726	4.68379	5.25957	3.4012	3.98429	6.27923	4.07049	4.17983	3.28307	3.72651	4.43644	4.06198	5.16237	4.60117	4.57984	6.10476	6.75572	5.00142	5.90303	3.20589	3.59047	4.1247	7.50158	3.64544	5.43132
ANO5	8.63726	7.5333	4.18282	5.99489	7.47737	6.65471	5.08873	7.72881	5.43251	5.11234	6.24652	5.48374	6.87829	4.36733	5.13587	4.93708	5.42539	5.11593	8.4739	6.41549	6.96217	7.55886	5.27256	4.00747	4.4285	5.87929	4.5151	4.11997	5.93931	7.21879	5.44704	6.1541	6.12573	4.75447	4.14587	6.64613	7.55924	4.83452	7.33401	4.61776	7.24073	8.52348	6.17964	6.43624	7.67991	6.13947	3.79689	4.16967	7.68233
ANO6	10.2394	8.09059	8.90417	9.4794	8.54189	9.10411	8.52638	8.93128	8.87983	9.28924	9.72469	9.56046	8.88797	8.49855	9.26812	8.58089	9.12794	8.77065	10.3276	10.2574	9.63119	8.73909	9.36668	9.05866	8.91774	9.5629	8.86001	8.17678	8.0787	7.33614	8.59309	8.53532	7.66505	7.52664	8.33799	8.29916	7.78525	7.69784	8.80025	8.12452	8.76452	8.12631	8.53493	7.76652	7.4969	8.4172	8.83885	7.50192	6.90859
ANO7	5.82462	5.68629	5.82159	5.89544	5.67971	5.51143	5.83115	5.96234	5.63014	5.6959	5.84888	5.83121	5.65582	5.60257	5.94216	6.15047	5.67892	5.81726	5.4645	5.73017	5.93254	5.75902	5.6931	5.69405	5.49817	6.15473	5.76436	6.3384	6.2685	5.71053	6.13594	5.94306	5.91045	5.69169	5.60822	6.1996	6.04349	5.76681	5.61829	5.55889	5.87839	5.5996	5.73676	6.30913	5.88528	5.77188	5.79731	5.81992	6.02277
ANO7L1	4.59465	4.59028	4.59574	4.58848	4.80175	4.59127	4.45775	4.52377	4.66721	4.62925	4.46011	4.46446	4.48769	4.96743	4.37462	4.96991	4.48572	4.36555	4.61972	4.50458	4.62584	4.77438	4.63811	4.84517	4.53207	4.68646	4.67784	4.60752	5.42171	4.32466	5.05241	4.75016	4.61813	4.69152	4.78451	4.60805	4.6337	4.86966	4.43099	4.24122	4.76463	4.78002	4.43177	4.64178	4.53838	4.56006	5.0533	4.42422	4.62991
ANO8	6.01962	6.18373	6.8295	6.13152	6.68658	6.47479	5.9494	6.14581	6.41053	6.43241	6.00302	6.47614	6.51584	5.73198	6.31531	6.51087	5.87888	5.78631	6.65807	6.19559	6.59007	5.92304	6.5256	6.20625	5.57718	6.04741	6.20732	6.32079	8.07833	7.09257	6.4246	7.57596	7.47045	7.46802	6.83098	6.86069	6.41265	6.99388	7.63595	6.78718	6.97068	6.92731	6.61122	7.07968	6.22503	7.09265	5.69758	6.46376	6.76195
ANO9	4.19905	4.82821	5.13989	4.44055	4.49307	4.49937	5.32791	4.27868	4.64095	4.6581	4.42463	4.46446	4.24583	4.57189	4.28255	5.04968	4.5894	4.49532	4.2869	4.53289	4.62832	4.29801	4.44778	4.72964	4.46019	4.62579	4.869	4.82827	5.28015	4.3243	4.82873	4.88781	5.23914	4.76724	4.66624	4.89197	4.5432	4.74598	4.60481	4.24588	4.57351	4.51051	4.83884	4.49405	4.76421	4.6581	4.81834	4.85989	5.05107
ANP32A	8.3243	8.47563	7.85976	7.93565	8.56175	8.51565	7.33861	7.87618	8.15028	7.90233	8.79595	8.49327	7.9857	8.41244	7.96655	9.10639	8.18203	8.57061	8.42581	7.9426	7.93148	8.19364	7.1791	8.92822	7.98024	7.44774	8.22813	7.1363	6.27712	5.65976	6.35606	6.48482	6.62395	7.83095	7.8247	6.83976	6.70709	7.4471	8.16575	8.81015	9.09244	8.79082	8.77325	8.47556	9.62353	9.018	8.24306	8.72678	7.40185
ANP32A-IT1	2.90413	3.59442	3.33195	2.90968	2.79267	3.21748	3.07188	3.34289	3.86608	2.79024	3.24088	3.30249	2.65647	2.79104	3.29682	3.29796	3.56348	3.19986	3.25135	2.80928	3.79379	3.31382	3.24089	3.14494	2.96132	2.81352	3.44997	4.27887	4.87348	4.74572	4.28246	4.57392	5.67541	5.57129	5.50208	4.83244	4.05371	5.81423	4.91687	5.71834	4.58471	5.85891	4.18808	4.37886	4.00554	5.26863	3.60918	4.84746	4.12481
ANP32B	10.2746	10.2355	9.84354	10.8353	10.9973	10.9237	10.5601	11.8968	11.2777	11.3	10.6685	11.128	11.1552	11.6281	10.7576	11.3803	10.8586	10.7463	10.9949	10.9703	10.7482	11.5193	11.7841	11.0865	9.62272	11.7969	11.6033	10.9779	9.5099	11.2128	10.5623	11.3211	10.7423	11.6704	11.0249	11.4721	10.6752	11.8826	11.6419	10.35	11.3899	11.0662	11.5319	11.8801	11.1578	11.1386	11.101	11.1732	10.0147
ANP32C	3.45842	3.37137	3.41902	3.26568	3.26652	3.44435	3.26581	3.15565	3.18521	3.29421	3.21934	3.24513	3.15566	3.18345	3.20443	3.37353	3.21169	3.14661	3.22337	3.11154	3.29478	3.19056	3.1066	3.34356	3.13626	3.04918	3.15428	3.70517	4.05366	3.11326	3.2568	3.5829	3.28517	3.60643	3.29806	3.20018	3.56676	3.25342	3.27508	3.04972	3.51215	3.74939	3.31838	3.28775	3.3126	3.52724	3.37316	4.02999	3.55566
ANP32E	8.27476	7.91713	6.65207	8.37918	8.76568	8.59197	5.19654	9.43346	6.76992	7.48818	8.54883	8.09329	9.0237	9.34697	9.18321	7.59798	7.59684	9.61193	7.85207	7.91653	6.31979	9.51968	7.45142	9.5305	8.54059	7.52455	6.18411	4.15809	5.19897	9.79232	7.37856	6.84955	7.41507	9.10216	8.71105	8.84657	9.30749	7.11117	9.12447	9.05811	8.77442	9.89293	7.24526	10.2081	8.90711	9.73426	6.58771	7.93386	9.05616
ANPEP	3.96939	4.45604	5.24298	6.23681	4.63424	4.27036	8.35486	4.01887	4.34914	4.99524	5.007	4.34346	4.28442	4.05764	4.37439	4.45199	4.0437	5.47594	4.06913	6.04096	4.51938	3.86715	4.8652	4.0781	4.59764	8.32559	5.19813	5.39591	5.14594	4.26326	6.46715	4.18545	4.85379	3.92085	4.76868	4.91182	4.01617	4.12929	4.50464	4.7766	3.88673	4.70018	6.39101	3.88016	3.92008	4.3209	9.79898	4.30818	4.01837
ANTXR1	11.46	9.74858	9.78313	10.2397	10.9071	9.38853	7.34985	10.6013	10.2139	9.50294	9.95709	10.7938	10.5941	11.5703	10.3096	9.50406	10.1136	9.98331	10.834	10.889	10.9865	9.52952	9.90238	11.1813	10.7388	9.30739	9.77134	9.1293	9.75462	9.72921	9.75701	9.3933	8.51295	9.7262	9.49125	9.27786	9.09844	9.04657	10.4988	9.876	10.0974	9.18109	10.2506	7.33995	9.46731	9.58693	6.98088	9.73455	9.34749
ANTXR2	8.71502	6.47776	6.35072	8.77406	7.4252	8.40969	6.68901	7.68226	7.38836	6.44713	7.87002	8.54987	7.47904	8.6766	6.92915	7.50992	8.20154	8.80841	6.47848	8.37916	5.19873	7.97034	6.64654	8.51642	7.33116	11.4265	7.92462	6.93813	4.75735	5.90642	8.29265	6.80632	7.25119	6.2536	7.37877	5.55266	5.90868	5.71137	7.32042	7.82343	6.23731	6.94014	7.82092	5.46796	5.27375	6.14	11.1098	4.74268	5.98538
ANXA1	10.7582	5.67721	9.1983	11.426	8.44694	10.3508	12.0218	11.1467	10.6902	11.1031	8.02744	10.8485	10.4584	11.1892	7.86477	9.93207	10.3056	11.7596	8.75399	10.1047	7.56815	9.33675	11.2427	8.69922	9.17913	12.1438	10.1866	9.18507	7.23365	7.5579	11.3271	10.614	9.38667	7.82563	8.4708	7.73395	7.81709	7.73874	9.889	10.1056	9.48878	10.0709	9.36563	11.0598	7.71401	11.9225	10.607	6.68298	8.53519
ANXA10	2.67873	2.62632	2.85281	2.94185	2.80181	2.66621	2.6702	2.82399	2.89207	2.8064	2.80154	2.91332	2.72115	2.93887	2.95043	3.09826	2.80638	2.64813	2.84028	2.812	2.67499	2.81088	2.77934	2.73214	3.38981	2.69357	2.74763	3.08258	2.79443	2.66269	2.82588	2.7924	2.99693	2.57747	2.82766	2.96493	2.72766	2.67307	2.69416	2.89438	2.72627	2.7746	2.97612	3.09295	2.73625	3.01306	3.17659	2.92261	2.80515
ANXA11	7.70349	7.8608	9.88582	8.89313	8.33804	9.11065	9.20061	6.97304	6.9582	8.71293	6.80119	8.61621	7.08869	8.10364	8.53446	8.03347	8.93215	8.63936	9.07797	8.85856	8.66682	7.88378	8.10512	8.80139	8.50249	9.84437	9.28224	8.91249	8.38566	7.06374	9.16408	8.3833	6.70839	8.11926	8.66619	8.2283	9.15856	8.39845	8.52092	8.68593	9.52033	6.88933	9.15091	7.57878	7.89951	7.41994	9.65359	7.29395	8.48981
ANXA13	3.7026	3.67905	3.8271	3.79961	3.33479	3.67511	3.91622	3.30049	3.52744	3.56544	3.66981	3.32865	3.41186	3.41501	3.41984	4.02348	3.50812	4.2679	3.51705	3.44256	3.81127	3.47996	3.29989	3.46086	4.96076	3.18501	3.86236	3.44161	4.01773	3.42589	3.49778	3.6016	3.66301	3.42493	3.33742	3.41876	3.40312	3.59626	3.35741	3.20263	3.76995	3.63859	3.48376	3.66249	3.61794	3.58305	3.93975	3.67895	3.68524
ANXA2	11.7174	9.21998	10.1275	11.8785	9.40012	8.7661	11.7782	8.39312	9.32702	11.1962	12.9632	11.754	11.3113	12.2043	10.6777	11.6854	12.0843	12.0911	10.4362	11.5018	10.9718	12.3831	12.2903	12.2068	11.1947	12.7116	11.9124	11.3673	8.79586	9.15167	11.828	11.2348	7.53287	10.8834	11.5002	8.99637	8.89658	10.2134	11.0601	11.697	10.0908	7.97762	11.2725	10.4579	10.3333	7.52887	13.1114	10.4651	7.30772
ANXA2P1	3.96588	3.42672	4.05102	4.23617	3.65171	3.78685	4.48338	3.58075	3.60203	3.71045	4.86668	3.61578	3.86544	4.39754	3.65936	3.5532	4.3274	4.71572	3.92646	3.83374	3.79636	5.46808	4.45736	4.84733	3.84182	5.57065	3.96331	4.04623	4.07671	3.39448	4.42273	3.91191	2.87701	3.8487	3.5617	3.21199	3.34733	4.23556	3.52008	3.90641	3.81484	3.29162	3.7286	3.7891	3.46076	3.23642	5.71233	3.60773	3.64315
ANXA2P2	9.9584	8.27255	8.93467	10.2611	8.26277	7.92645	10.3718	7.50587	8.02296	9.74768	11.2424	10.0198	9.47055	10.489	9.25335	10.0139	10.4439	10.4461	9.09649	9.83833	9.53886	10.8186	10.5911	10.6011	9.62505	11.0666	10.3388	9.88915	8.30974	8.15498	10.2358	9.7945	7.54897	9.4083	9.90593	7.93948	7.87395	8.85449	9.46723	10.0413	8.74696	7.18815	9.74029	9.20158	8.94171	7.14734	11.6919	9.08369	6.95756
ANXA2P3	5.26039	4.63433	5.09708	5.40256	4.484	4.0863	5.22579	4.86969	4.43089	5.03357	5.3388	5.4106	5.11539	5.17382	5.06499	5.08532	5.32978	5.56176	4.93213	5.91647	5.08805	5.17319	5.33482	5.31126	5.02599	5.55501	5.29509	5.94565	5.07442	4.57104	5.12821	5.29166	4.85013	4.84739	4.90919	5.21278	4.65538	5.10558	4.9067	5.07613	5.00982	5.05158	4.99196	5.04052	4.75296	4.98484	5.67929	5.05764	4.85099
ANXA3	6.83974	2.55998	2.80549	3.79107	3.37014	2.99306	5.34135	2.97816	2.81675	2.95172	2.89351	3.17121	2.82632	3.75323	3.1011	3.39558	3.07621	3.1459	2.66673	3.12121	2.85704	3.10042	2.86535	3.2479	2.6966	2.85011	2.98353	3.07849	2.64092	3.55889	3.00346	2.77133	2.77413	2.97089	2.93221	3.03711	5.08992	3.91897	3.30716	2.96203	4.96635	2.93776	3.00501	2.87203	2.64325	2.90104	5.64287	3.19261	5.63664
ANXA4	7.91538	5.72238	6.38275	8.45011	7.2478	5.57907	9.08828	5.56721	6.36406	7.67922	7.84864	9.18162	6.92468	9.22323	7.74443	4.42143	7.6176	8.97813	8.38924	8.09919	6.28471	6.83914	6.70747	7.72367	8.98799	9.11856	7.95624	6.84926	6.61564	6.43458	8.36601	8.11278	4.77775	6.66438	6.34328	6.2757	7.21597	6.70391	7.04318	6.7971	7.85866	4.05292	7.10557	8.01906	4.96456	4.24555	8.8482	4.98953	6.87312
ANXA5	12.5728	10.3053	11.0216	11.7506	11.2823	11.5785	11.5684	10.7837	11.0307	11.1002	11.8834	12.2776	11.0263	10.8414	11.318	11.9475	11.7855	11.5188	11.521	11.6447	11.7071	10.8231	11.3271	11.478	10.8453	11.5797	11.3363	9.75867	10.4479	9.1457	11.4681	10.5736	10.2789	10.2513	11.193	9.98017	9.72935	9.84111	11.2846	10.6109	10.3991	9.18656	11.0868	10.0574	11.3753	10.1995	11.4106	9.9077	8.89618
ANXA6	8.6589	7.74718	9.51202	8.42912	8.78298	8.96978	8.6547	7.64188	8.39438	9.03846	8.01668	8.05377	7.87816	7.76101	7.70056	8.30859	8.46049	8.10306	8.68052	9.34627	9.44797	7.41785	8.91132	8.2917	9.29602	7.39753	9.1647	8.82731	8.42781	7.70331	9.61103	8.09358	9.01259	8.15353	8.59227	8.62395	9.11149	8.56577	10.141	8.69483	8.635	7.15437	9.16994	7.74569	9.7799	8.40657	8.95728	8.57381	8.707
ANXA7	9.51169	8.60421	8.28933	9.7738	8.957	9.04923	8.74924	9.32493	8.19141	9.23307	10.0132	9.46001	8.8288	9.06214	9.44088	8.50731	8.864	9.35174	9.81447	9.39153	9.02616	8.59368	8.55877	8.97381	9.51401	9.32529	8.8364	7.32453	7.59362	7.8372	8.29635	8.74252	7.6828	8.23565	8.89579	8.50088	8.99465	8.15523	9.04453	8.6471	9.18197	7.97406	8.43778	8.1126	8.9787	8.7065	8.69592	7.95828	8.83452
ANXA9	3.86722	3.96949	4.4488	4.23015	4.03857	3.90702	5.00307	4.09654	4.14422	3.94441	3.97431	4.24226	4.0526	4.002	4.43842	4.78127	3.88515	4.36659	3.87479	3.95934	4.12804	4.512	3.88101	4.22799	4.01809	4.51865	4.08617	4.44951	4.80397	4.02911	4.16241	4.39557	4.13013	4.33433	4.06116	4.27963	4.08767	4.29111	4.14197	3.95367	3.8559	3.9429	4.12972	3.83138	4.10674	3.91393	4.58794	4.33221	4.43659
AOAH	6.59268	5.49794	5.20491	6.65302	5.92008	5.3515	7.26423	5.20808	5.17342	5.7092	5.17861	6.8335	5.20657	5.83458	6.23665	5.26723	5.64808	5.13022	6.50109	6.9339	5.84438	5.16562	5.7412	5.78258	6.50789	6.03211	6.57951	5.94526	5.24399	4.78223	6.40359	5.95703	4.42959	5.7235	5.4174	5.58723	5.4935	5.87222	5.96296	6.25809	5.83112	4.98124	5.89422	5.12405	5.17641	4.77392	5.47126	5.25137	5.29285
AOC2	3.72356	4.3206	3.98566	4.03175	3.6686	3.40778	4.32334	3.64019	3.71361	4.46858	4.17543	3.83374	4.06141	3.90978	3.88616	4.11683	3.85881	3.57774	3.61586	3.71409	3.98289	3.64987	3.93447	3.48588	3.66006	3.68481	3.78766	3.56354	4.15599	3.51796	3.52973	3.60427	4.03439	4.13373	3.52	3.66032	3.59984	3.6446	3.79619	3.70977	3.45367	3.27533	3.69544	3.4467	3.52108	3.52465	3.64396	3.77128	3.55858
AOC3	3.16222	4.14708	5.28202	3.48424	3.07137	3.23836	4.64437	3.18707	3.03323	3.65095	3.5621	3.26431	3.61023	3.13829	4.04477	3.49834	3.24576	3.51198	3.99727	6.83103	3.53505	3.07413	3.4888	4.47438	3.4635	4.05706	4.81313	3.6119	4.23099	3.21283	3.75198	3.62784	3.46035	3.20779	3.562	3.39925	3.85286	3.19439	3.16873	3.14204	3.2617	3.5746	3.33121	3.55279	3.5445	2.75594	3.83496	3.7172	3.79956
AOC4	5.37427	5.30072	5.73296	5.44704	5.50136	5.37954	5.93541	5.32745	5.43618	5.62771	5.43141	5.35874	5.49531	5.60017	5.45101	6.02647	5.63837	5.44013	5.62264	5.54409	5.33149	5.76523	5.3314	5.59199	5.43207	5.54739	5.70204	5.89499	5.54677	5.21344	5.4452	5.19783	5.40247	5.28718	5.23321	5.24576	5.44658	5.58073	5.15271	5.05526	5.32628	5.33638	5.25046	5.37334	5.45956	5.2486	5.47047	5.48102	5.8406
AOX1	7.35943	4.67705	3.72169	4.59802	5.19325	4.18107	3.79801	3.83175	3.49483	4.1452	4.84063	4.23453	3.8629	4.20809	4.95767	3.8001	3.34453	4.40226	6.37771	6.49257	5.55198	4.0398	4.18107	4.45247	6.00722	6.44151	3.35007	3.75632	4.6456	5.28846	3.57326	3.98438	3.38421	3.98301	4.49408	4.94018	4.05977	3.60426	6.11762	3.52772	2.90534	3.10982	4.27746	3.42083	3.59887	3.85002	6.0058	3.78612	3.31501
AP1AR	8.04851	7.56762	4.88809	7.38308	7.57085	7.23891	6.09571	7.49947	6.49195	7.35114	7.99768	7.59007	7.0984	6.99906	7.19475	6.11483	6.67775	7.45071	7.19193	6.90198	5.34209	8.25061	6.30911	7.66542	6.69815	7.79491	6.19968	3.9007	4.84194	4.93038	5.2748	5.11339	5.85355	6.32397	5.02674	6.06379	5.79464	4.91146	5.39149	6.26567	6.33639	5.39547	5.66026	6.15819	6.07765	5.11195	7.41197	5.65277	6.64765
AP1B1	7.77198	7.36318	7.63027	7.4218	7.30965	7.67367	7.96308	7.02551	7.71472	7.87497	7.49596	7.50249	7.13322	7.39833	7.57365	7.18567	7.35915	7.10938	7.40627	7.63023	7.43052	7.36986	7.20732	7.59979	7.66686	7.294	8.27947	7.82061	6.87532	6.92402	8.36278	8.45828	7.33044	7.65461	7.89213	7.67014	7.84299	7.98135	7.5282	7.59294	7.80662	7.45533	8.04675	6.90752	7.56372	7.0146	7.59484	7.13889	7.43342
AP1G1	7.11924	6.494	5.62161	6.58847	5.419	6.18701	5.80047	7.15278	5.55136	6.79387	7.54631	6.10946	8.17228	6.80402	5.77242	6.36886	5.67043	5.7118	5.93972	6.49732	6.02623	6.5295	6.35185	6.96548	7.01633	6.66251	5.98988	6.30278	4.60919	7.02535	5.784	5.4624	4.82188	5.95266	7.16878	5.97024	5.57827	5.72194	6.0934	6.45337	6.11363	7.0783	6.59337	6.48308	7.46032	7.52376	6.45093	5.70931	5.25258
AP1G2	5.42861	6.02609	6.2653	5.36111	4.9284	5.68799	8.40259	5.2116	6.60352	6.10191	5.72146	5.85345	5.82454	5.28794	5.50246	5.76387	6.20641	5.75655	5.85938	5.83031	6.70498	5.18491	5.3971	5.52881	5.22087	5.45874	6.56979	7.48398	7.75069	7.05821	6.8885	7.15912	7.40712	8.06169	6.96409	7.20891	7.56906	7.13028	6.74041	6.42045	7.10562	6.13491	6.74109	7.22992	6.68715	5.79808	8.41038	7.45384	7.38387
AP1M1	5.68048	6.23504	5.29311	6.17437	6.02252	6.20967	5.50131	5.70759	6.03153	6.10162	5.96592	5.99783	6.37317	6.10716	5.04742	5.80388	5.51182	5.11042	5.64834	5.70372	5.65158	5.8865	6.30347	5.47708	5.6574	5.85807	5.22828	6.23445	6.16886	6.3012	7.1256	6.76826	6.66191	8.12406	6.69948	7.38587	6.87528	6.82515	7.08183	6.54168	6.87284	6.80982	6.59836	7.092	5.24858	6.33845	7.50432	6.87661	6.08564
AP1M2	4.41776	4.76652	5.33971	4.71782	4.78915	4.5534	5.26312	4.55855	4.60677	4.78901	4.90438	4.52727	4.72088	4.73982	4.70983	5.09722	4.75772	4.43452	4.43113	4.53565	4.80681	4.33589	4.81561	4.53115	4.68395	4.84546	4.85512	4.62437	5.48853	4.55799	4.73019	4.72517	4.73462	4.98201	4.56554	4.53392	4.95445	4.80449	4.62758	4.15573	4.72838	4.57886	4.6731	4.97163	4.77184	4.51041	4.86964	4.54608	4.3558
AP1S1	7.08154	6.67064	5.30743	7.17184	7.3701	6.01298	5.8513	6.81755	6.37372	7.02074	7.14418	7.40289	7.61417	7.41895	6.90133	6.77252	7.58887	7.23424	6.95704	7.0563	6.8203	7.19841	6.11918	7.27213	6.75964	7.90324	6.18911	5.33506	5.22448	7.08155	6.45618	6.09803	5.38954	7.09929	6.48175	7.12165	6.94925	6.3474	6.69688	7.80223	7.37843	6.66678	6.54723	8.34788	8.54488	6.28057	9.05945	6.93244	6.31243
AP1S2	8.65093	7.96308	8.13359	9.16414	8.56426	8.83062	10.7165	9.27104	8.52454	9.37394	9.90811	8.20998	10.4844	10.3507	8.5765	8.51565	9.4212	11.581	7.06593	7.5894	6.08658	8.37276	8.56048	7.82182	8.13952	9.39426	8.99739	9.92442	7.25126	8.33155	8.49806	7.46735	10.009	7.63776	8.70907	7.81999	7.51789	8.22554	8.98135	11.0334	8.73817	11.3261	8.16643	9.20729	7.47135	10.3553	8.13582	9.10624	7.8105
AP1S3	2.50704	2.49033	2.5037	2.92662	2.64688	2.66706	2.95428	2.37203	2.47371	2.33239	6.31932	2.87544	2.43465	2.76825	2.53237	3.0134	2.40962	2.48169	2.49885	2.57588	2.43218	3.21932	2.45697	2.84696	2.49111	2.5775	2.35554	2.76094	2.59034	2.93448	2.88668	2.25574	2.50337	2.84075	3.00522	2.49606	2.81099	2.54393	2.74286	2.80118	2.83693	2.43187	2.86942	3.16808	2.65356	3.14338	2.97918	2.51066	2.53346
AP2A1	3.06188	3.471	3.01184	3.11464	3.18929	3.60309	3.33701	3.15522	3.67455	3.25953	3.44715	3.50148	3.42719	3.16603	3.33425	3.69233	3.38669	3.42492	3.19995	3.37238	3.43042	3.54271	3.2114	3.57371	3.39942	3.62111	3.44131	4.32229	3.74595	3.92932	4.90672	4.61167	4.05141	6.16712	4.95016	5.63518	5.60488	4.94347	5.55465	5.39707	5.94334	5.48642	5.39936	6.63003	6.47627	5.99699	5.64644	5.38461	5.46801
AP2A2	5.74171	6.05861	5.51915	5.04729	5.56642	5.42537	5.6579	5.21979	5.65069	5.60153	5.54487	5.05227	5.17996	5.27245	5.07478	5.92195	5.44464	5.04095	5.2824	5.35309	5.92618	5.44714	5.2489	5.23281	5.47452	5.27266	5.65278	6.36838	5.66864	5.98365	5.76783	6.09362	6.01315	6.10392	6.10497	6.19333	6.25074	5.74277	6.33169	6.14893	6.25821	5.70513	6.09375	5.17089	5.72658	6.18248	5.66228	6.16543	6.12564
AP2B1	7.66676	7.7381	7.96985	7.71707	7.97152	9.18134	8.39011	7.5288	7.87208	8.71831	8.58097	8.52552	8.36264	7.76573	7.72086	7.58541	7.23262	7.91383	8.31663	8.0291	7.7296	8.01338	8.38496	8.13861	7.77026	8.0238	7.95661	7.44264	7.11854	8.40215	8.36884	7.36179	7.243	8.39336	9.36923	8.38482	7.88394	7.66647	8.58992	7.74799	8.35259	8.06292	8.40497	7.64333	9.24398	9.08868	8.76482	7.21484	7.38672
AP2M1	7.24658	8.5881	7.43877	7.78863	8.10032	8.55607	8.02767	7.6042	7.94955	8.17725	8.22463	8.35044	8.20492	6.97308	7.66677	8.05211	9.0705	7.50088	8.43133	8.67546	8.26188	7.60478	7.6799	8.02806	7.9781	8.64063	8.07666	10.0564	8.57528	9.53258	9.85054	10.0354	9.36364	10.2363	10.1915	9.89042	10.3284	10.262	10.0779	10.2485	9.96357	9.76326	10.0778	9.43331	10.4657	10.2248	10.5523	9.65361	10.0299
AP2S1	8.55091	8.69562	7.89076	9.10902	9.13178	8.82402	9.31683	8.59014	8.44116	8.93999	9.18604	8.84181	9.13102	8.9452	8.53406	9.10642	9.37956	8.9876	8.40248	8.86439	8.28892	9.05909	8.78122	9.19243	8.63582	9.37435	9.38007	9.50747	7.61693	8.00707	10.0514	8.91106	8.15759	10.4955	8.77983	10.5652	9.3274	9.81395	9.08693	9.26422	9.04706	9.01765	10.3065	9.96384	9.96631	9.09347	11.2748	9.63406	9.05713
AP3B1	8.20505	7.54627	6.95588	8.08457	7.80228	8.00839	7.98879	8.05358	7.30358	8.31783	8.26154	8.04774	7.58015	7.8339	7.81997	7.31378	7.90831	8.02939	7.92998	7.92735	7.64002	8.27347	7.5306	8.33842	9.01221	8.30985	7.67685	5.97498	5.84837	6.31917	7.57024	8.04232	6.49657	7.27518	7.64161	7.26506	7.01197	7.33567	7.78974	7.58006	7.71896	7.24323	7.11787	6.79503	6.74528	7.45109	7.88224	6.5756	6.81187
AP3B2	4.67676	7.24989	4.69022	5.38867	6.05511	4.26975	4.57788	4.31479	6.36644	5.02168	4.51259	5.89361	5.81418	5.48367	4.49906	4.60577	5.67342	4.45979	5.93393	5.11438	6.39939	4.54836	5.3142	4.76261	5.28729	4.78585	4.91847	5.77394	8.10902	7.49081	5.23102	6.4034	5.51154	6.78914	5.93368	5.32069	7.7055	6.46538	7.05044	6.40149	6.62914	3.95429	6.45069	7.55675	7.04475	3.97984	4.1618	6.88897	7.14369
AP3D1	9.66963	10.2443	10.2236	9.51607	9.93511	10.2175	10.7838	9.70686	10.1245	9.68489	9.51578	10.0924	9.03381	9.44888	9.55947	10.8009	10.0891	9.71204	9.38081	9.63721	10.1097	10.1575	10.0321	9.61114	9.68358	9.64756	10.083	9.4084	9.74661	7.70273	8.7733	8.87839	9.07395	8.47427	8.79856	8.03576	7.25815	8.47128	7.95742	8.27426	7.72979	8.5308	8.69354	8.61536	8.45739	8.29624	8.86002	8.76061	8.45931
AP3M1	8.30113	7.33075	5.84489	8.16452	8.53361	8.44724	6.9185	8.76211	7.0835	7.79681	8.60651	8.24511	8.35706	8.47742	8.27537	8.27456	7.88743	8.16927	8.27208	7.86011	7.42811	8.84495	7.87762	8.63057	8.68095	7.59709	7.56344	6.44627	5.85241	7.55175	7.10834	8.38436	6.8373	8.15048	8.07072	8.1848	7.56156	7.91789	8.14263	7.90368	7.65206	8.83168	8.28379	8.11424	8.70077	8.47285	7.90397	7.32187	7.07463
AP3M2	8.96082	8.06783	6.97684	7.89659	7.87555	7.65836	7.18075	8.43717	7.90184	7.73096	8.22353	7.6809	7.76093	7.73629	8.07421	7.39155	7.92719	8.29331	7.95402	7.63909	7.75451	8.47749	7.84729	7.81831	7.96292	7.70963	7.49307	7.78448	8.10121	8.06064	7.59479	8.2204	7.46101	7.68285	7.6591	7.92572	8.53017	7.8561	7.79408	7.22301	7.68427	7.32106	7.67253	8.18733	7.50946	7.66766	7.17466	6.92254	8.61532
AP3S1	9.81102	10.0465	10.054	10.3276	9.99405	10.0007	10.3745	9.2932	9.59284	10.2816	9.72065	9.78269	9.95632	9.85209	10.1575	8.88121	10.2088	10.369	9.50136	10.1302	9.36082	11.079	10.3765	10.101	10.5807	10.7225	10.1301	8.87322	9.90443	9.66037	10.0511	9.48813	9.15211	9.5822	9.34198	9.95681	10.4128	9.65417	9.69715	9.55478	9.67948	10.0464	9.43954	9.8024	10.2273	9.64709	10.6394	9.53832	10.2023
AP3S2	7.29059	7.16945	6.8233	6.2717	6.88074	6.34662	6.91961	6.76237	7.75995	6.3571	6.44826	6.72525	6.64649	6.73887	6.72462	6.00789	6.96888	5.91196	7.21455	7.25773	6.99496	7.0658	6.7286	6.46075	6.78523	6.56545	6.54233	6.83706	7.34995	7.76625	7.33017	7.58257	7.37018	7.7136	7.28161	6.9845	7.28952	7.591	7.9664	7.27153	7.988	7.22909	7.49616	6.05984	7.26724	7.79776	6.181	7.26331	7.82092
AP4B1	7.16666	8.30418	6.56432	7.2394	7.11419	7.55512	7.21459	7.5197	7.57487	7.46705	7.59472	7.52526	7.84122	7.90955	7.50133	8.10097	7.54489	7.24515	7.24728	7.07969	8.04571	7.56059	7.89733	7.42427	7.16131	6.81192	7.34048	7.74947	7.01887	8.16582	7.82966	7.34992	7.98447	8.2322	8.03134	7.42562	7.48413	6.9176	7.58885	7.73897	6.95315	7.73151	7.64902	8.48676	7.28394	7.48362	7.53074	7.29021	7.17344
AP4E1	6.9252	6.98529	6.1371	6.32496	6.56341	6.41432	6.8029	7.02691	6.77832	6.17059	6.96471	6.28628	6.54572	7.13176	6.90602	5.55356	6.66728	6.47803	6.38609	6.45105	6.16079	7.00807	6.63343	6.70314	6.62651	6.95448	6.38631	6.19789	6.58954	5.71627	5.89662	6.05094	6.46723	6.26651	5.83	5.81054	5.54586	6.08067	6.23223	6.04368	6.03223	6.36062	5.77507	5.93248	5.84446	6.29701	6.32505	5.87463	5.74703
AP4M1	6.32483	5.83873	5.94261	5.99713	6.40444	6.58242	5.36542	6.20845	6.32787	6.0277	6.1784	6.58385	6.3628	6.26728	5.5715	6.22155	6.46685	6.3321	5.82385	5.96687	5.95285	6.85314	5.87523	6.77376	6.59854	6.90556	5.85636	6.71289	5.41759	4.95627	6.22756	6.56324	6.47768	6.40108	6.27517	6.45416	5.76131	6.2603	6.22743	6.55862	6.07458	6.25541	6.10577	8.03754	5.99235	6.28393	7.21199	5.89591	5.80102
AP4S1	6.05869	5.39294	5.66477	5.59186	5.39306	5.34105	5.01997	6.25027	6.5318	6.0615	5.96475	6.25509	7.08423	5.63795	6.31569	5.0811	5.79098	6.83455	6.54649	6.16126	6.10497	5.64426	4.95487	6.64487	6.05674	6.34258	5.39565	3.80089	5.7177	6.78565	5.16792	4.77791	4.92716	5.21595	5.83044	4.45276	5.85681	4.75732	5.58918	6.71131	6.0279	4.75233	5.60951	4.79261	6.64096	5.75937	5.49145	4.90411	6.33158
AP5B1	3.57029	3.5136	3.77935	3.97355	3.84599	3.87891	4.40273	3.88983	4.22092	3.87196	3.75877	3.99875	3.83842	3.60812	3.84523	4.08801	3.68732	4.19382	3.94985	4.13802	3.84679	3.90601	4.2859	3.97127	4.16214	3.94751	4.05831	5.85597	5.26228	4.60938	5.61156	5.07215	5.40135	4.7891	5.46552	4.72838	4.67421	5.15881	5.44857	4.97428	4.9373	4.72983	4.90282	4.99918	4.34305	4.14104	4.47389	5.33121	4.85663
AP5S1	7.35696	5.33215	6.34407	6.33093	6.08827	5.84556	6.79305	6.19906	6.28247	6.3503	6.39014	6.27557	5.9799	6.20016	5.98833	6.48799	6.89323	5.97967	6.2974	6.12545	6.26554	6.10125	6.03494	6.40991	6.66473	6.60684	6.25906	6.93621	6.51874	6.17256	6.79395	7.16734	6.39007	6.38065	6.37542	6.45708	6.63419	6.55391	6.38	6.18965	6.72183	5.79973	6.99401	6.26846	6.55391	6.08458	7.12317	6.05726	6.55929
APAF1	7.43787	7.65215	7.40606	7.57772	7.59114	8.06727	6.98421	8.14845	7.6516	7.22341	8.29589	7.30306	8.33632	7.16523	7.35844	6.49009	7.26993	7.48501	7.49023	7.78733	7.51552	7.41043	7.01332	7.32344	7.66241	7.39406	7.12066	7.27193	7.09929	7.35845	6.63741	6.59096	8.45915	6.14939	7.82485	7.06724	6.29874	7.32502	7.04798	7.81455	6.25636	8.06624	7.08658	7.21162	6.59836	7.73915	7.30319	7.56494	5.99388
APBA1	5.63991	5.59057	5.73075	4.90212	7.24514	4.68509	4.82583	6.22929	5.72745	5.7588	5.88161	5.50838	5.8433	4.98398	5.55861	4.95103	5.20549	5.91142	6.04401	5.53717	5.76654	4.54381	5.79488	4.28656	3.95677	4.33741	5.64481	5.60768	7.35723	7.09066	5.64668	8.32766	6.48639	6.68944	6.23516	6.48829	7.86911	5.9477	7.02747	5.98703	7.34566	7.26797	6.12562	5.89052	6.41519	6.07327	3.7188	6.17398	8.84448
APBA2	9.19059	9.99901	9.14811	8.35278	9.2889	8.53113	7.33715	9.68584	9.72613	9.0227	9.32322	8.21318	8.72407	9.15259	8.85715	8.1277	8.21742	7.4676	10.2397	9.23046	10.2066	9.15894	8.41157	8.41133	7.52845	5.3252	8.55278	8.43189	10.3925	9.53794	8.31547	10.1614	8.78191	9.73742	9.60895	8.95244	9.82234	9.2279	10.0015	8.14705	10.0693	9.72996	9.24346	8.91242	9.33677	8.79745	4.93593	9.37702	9.79958
APBA3	5.64407	5.16863	5.64036	5.3082	5.55393	6.00267	5.92613	4.99907	5.87062	5.74133	5.53265	5.89411	5.27367	5.35804	5.4075	5.43068	5.21908	5.41348	5.89784	5.51182	5.92205	5.32582	6.31462	5.4643	5.48925	5.86081	5.5879	6.70601	6.20273	6.15242	6.26138	6.40079	7.05457	6.52878	6.4321	6.23043	5.99087	6.42419	6.36158	5.57879	5.99445	6.23482	6.05768	6.20963	6.04865	6.38076	6.58402	6.14169	5.71425
APBB1	6.43078	6.48819	6.41738	5.53425	6.34844	6.09852	5.18497	5.90008	5.57392	6.1005	6.20716	5.75346	5.61044	5.09706	5.44578	6.00916	5.72034	5.58651	6.09798	5.86472	6.48891	5.74436	6.23223	5.59308	5.7767	5.63654	6.422	7.01764	6.83443	6.19458	6.28093	6.07773	6.128	7.0247	6.77437	6.77406	7.24858	7.14367	6.98343	6.18211	7.56058	6.46078	6.68265	6.65443	6.94627	6.40363	5.71912	6.99187	7.15385
APBB1IP	8.71025	6.75865	8.43008	8.85733	7.40467	8.38011	8.92798	5.42722	6.47944	8.71986	6.50575	10.0822	7.45319	7.50128	9.48144	7.09499	7.81824	7.07782	9.61787	9.40641	8.71414	5.24104	7.43319	7.08265	8.30075	8.27878	9.20811	7.51962	7.62469	6.85151	9.61812	8.41713	6.86257	8.12166	8.09028	8.48904	8.60199	8.7748	8.46771	9.01801	9.24346	6.39031	9.82988	5.74659	6.65017	5.63642	8.06141	7.6793	7.27337
APBB2	5.66499	7.47227	6.65467	6.36459	8.24148	6.37556	5.97302	3.85993	6.6093	6.41137	7.96002	6.42122	6.71555	6.51946	6.3839	7.45336	5.15774	4.83281	7.22388	6.4622	6.82219	7.7369	6.07398	6.8097	4.70921	5.05043	6.74903	6.17896	5.70165	7.04197	4.99524	6.56218	7.12029	8.11379	7.61718	7.92349	5.76131	7.1517	7.27614	6.32487	6.46975	5.63883	6.59457	5.04377	7.98526	6.74471	7.10354	5.31986	5.89406
APBB3	5.76002	5.99588	6.63043	5.55462	5.86637	6.63423	6.89202	5.45097	6.79751	6.29431	5.69946	5.68928	5.83607	5.69787	6.12341	6.37119	6.04241	6.01138	6.09781	5.96385	6.32994	5.84649	6.57264	5.73722	6.18381	6.16004	6.23001	5.82604	7.44419	6.38477	7.42463	6.51882	7.55222	6.45388	6.70481	6.12245	6.82249	6.70684	6.43121	6.4358	6.61129	6.56936	6.55117	6.25494	6.15545	6.06622	6.32222	6.21486	7.38711
APC	6.08991	5.14509	5.67447	5.80103	6.00583	6.37303	5.36658	4.99519	6.51258	5.21683	4.62572	5.04038	4.8721	3.96196	6.60135	5.61061	5.17093	5.04944	6.51174	5.04734	5.74622	4.47326	5.40265	5.10221	4.55793	3.96568	5.22611	4.24544	4.14707	7.58896	7.99611	6.9216	6.69557	6.52843	6.9206	6.50734	7.10995	5.75928	7.96558	7.81294	7.67577	8.22741	6.12306	7.22933	7.12739	9.85823	5.19963	6.94127	8.78453
APC2	7.633	7.45948	7.99643	7.0487	7.58058	6.66575	6.50815	7.01532	7.18494	7.40939	6.26449	7.59396	6.81788	6.8241	7.63127	6.76795	6.6751	7.7286	7.58768	7.67573	7.98452	7.36112	7.14658	6.8097	6.73207	6.57078	7.54306	7.80631	9.55084	7.80416	8.69672	9.18908	7.13732	9.00406	8.70181	7.6611	8.17187	9.20147	9.26676	7.89805	8.92896	7.79772	8.52048	7.97575	7.62094	6.45228	6.24099	7.83147	8.399
APCDD1	8.87339	8.46279	7.81078	8.50047	9.2912	8.43952	5.1118	7.59006	7.7585	9.47801	8.48286	8.42892	8.10495	7.15025	9.17074	7.20813	7.70394	7.57728	10.8943	9.35264	8.54335	6.73029	8.77223	8.59071	10.8111	5.47724	8.19136	9.5566	7.79042	9.46519	7.74621	8.44816	7.78638	8.77775	8.62143	9.48818	9.90205	9.29892	11.3317	6.44539	9.89147	9.27515	9.77966	7.7915	6.91846	8.24617	6.89551	8.78783	9.32424
APCDD1L	4.71139	4.64757	7.09662	6.5624	4.81271	6.00133	5.23895	5.54228	4.99861	5.28106	5.10073	6.16894	4.7129	4.94051	4.80582	6.65643	6.8733	5.32698	5.17084	5.29402	8.681	5.09075	5.11052	5.09389	5.17324	8.39689	4.91004	4.73188	5.31962	4.5759	5.49782	4.87408	4.92915	4.84399	5.47463	4.73408	5.0371	4.90919	4.7031	6.80518	4.92608	4.77708	4.85532	4.62073	4.65139	5.135	9.01226	4.56494	4.92912
APCS	3.83834	4.01165	4.30741	4.09979	4.05195	4.07215	4.54196	3.69172	4.0972	4.20153	3.93034	4.09379	3.77254	3.91286	4.2622	4.66021	4.31726	3.91291	3.94721	4.0008	4.09426	4.14379	4.1677	4.11487	4.13531	4.31769	4.61187	4.02614	3.97734	3.59571	4.12166	3.98713	4.228	3.95174	3.9483	3.98527	4.02717	3.89211	3.7877	3.99859	3.98322	3.85994	3.76032	3.94947	3.74687	3.6369	4.22178	3.9998	4.09944
APEH	6.6435	6.98388	5.75415	7.18417	7.10235	7.48378	7.17497	6.74028	6.9132	7.60866	7.52617	6.81858	7.00148	6.27177	6.15525	7.13424	7.59207	6.99345	7.37522	6.98229	6.94982	7.24766	7.65275	7.7921	7.91734	7.60316	6.7676	7.33027	6.40458	7.63857	7.23407	7.07961	6.88494	7.81017	7.55828	7.95216	7.72017	7.91761	7.62564	7.40955	7.42398	6.96297	7.49001	6.85606	8.44205	7.24981	8.80778	7.16147	7.32398
APEX1	10.1108	11.0731	9.5768	10.2406	10.3983	11.2054	10.0567	10.3929	10.6725	10.3353	11.0914	11.3502	11.0303	10.9229	10.2059	11.4852	10.5535	10.7929	10.5181	9.98856	10.2415	11.8276	10.9244	11.9987	9.90436	10.7098	10.4586	9.37032	9.19941	10.4848	10.1397	10.4625	9.59313	11.0489	10.8716	10.1337	10.2842	10.7261	10.4426	10.6782	10.2535	10.4805	10.6592	10.5828	10.9298	10.8007	10.5477	9.83958	9.93917
APEX2	5.35846	5.37785	4.90793	5.18608	5.57075	6.15355	5.53773	5.77936	5.6936	5.16396	5.58035	5.79164	6.00489	6.41929	5.42256	5.5431	5.4059	5.57441	5.746	5.86506	5.29326	5.72587	6.60053	6.0663	5.70987	5.39693	5.43498	7.24342	5.01286	4.71812	5.19838	5.36615	6.26495	6.04519	4.94635	5.5589	5.21386	5.75127	5.23295	5.21392	4.8235	5.24804	4.86959	5.84765	5.185	3.87373	4.96663	4.95161	4.85699
APH1A	6.25891	6.7459	5.33552	6.60043	7.35478	7.15052	5.78582	7.15268	6.16758	6.63104	7.52401	7.32053	7.67831	7.19312	6.89919	7.21149	6.67491	7.17874	7.08874	6.48094	6.13762	6.86302	6.48681	7.19941	6.95346	6.59304	6.10553	5.10014	5.26228	4.61195	5.87278	5.47379	5.64054	7.75788	6.38851	7.15636	6.20048	5.63779	6.45609	7.26538	6.67801	6.53397	6.33927	7.63813	6.97128	6.87751	6.66358	6.05947	5.89619
APH1B	6.12952	5.29509	5.99856	6.05243	5.60515	5.84289	6.43166	5.53168	5.59568	6.41571	7.38362	6.775	5.92288	6.32111	6.15336	6.54081	6.63147	5.99105	6.2297	6.35867	5.71327	6.05766	6.07357	6.26488	6.58261	6.73396	6.05758	6.78271	5.76108	5.55415	6.70798	5.72221	5.03261	5.9515	6.2613	5.51405	5.91093	5.78259	5.99529	6.16045	6.01762	5.6821	6.13578	6.17944	6.94069	5.92199	7.19347	5.7199	6.04111
API5	5.5404	4.35523	3.18008	5.39523	5.59403	4.69545	4.53556	5.67539	4.55197	5.23922	6.07474	5.73307	5.15119	5.24835	4.75455	5.83051	4.14095	4.69209	5.08054	4.63222	4.61211	4.98568	4.92895	5.34702	4.81407	5.39338	4.22553	4.2834	4.24037	5.53522	4.24256	4.56369	4.58579	5.02724	5.838	5.3155	5.71103	4.4159	5.62652	6.37066	6.02955	5.47464	5.25528	7.08453	6.45507	6.44296	5.28785	4.73083	5.61582
APIP	8.53488	7.7456	7.353	8.55879	8.4529	8.15055	8.32701	8.38014	7.88468	8.46271	8.58891	8.7025	8.15328	9.10619	7.58337	7.51132	8.13995	8.06861	8.04878	8.36525	8.16701	8.48142	9.1323	8.59759	7.94249	8.1116	8.02562	8.18758	7.56044	7.68927	7.39247	6.78939	6.78035	7.60163	7.83435	7.74076	7.58821	7.51735	8.02401	7.67363	8.05273	7.26684	7.64046	8.37644	7.87828	7.31957	7.90646	7.19598	7.16368
APLF	3.01338	2.87332	2.82859	3.02185	2.95134	2.6209	2.85238	2.39285	2.53514	2.89741	2.49093	3.69801	2.7854	4.65167	2.78516	2.67964	2.66818	2.89523	2.81398	2.74851	2.63689	3.39482	2.68146	2.89851	2.52455	3.00577	2.5855	3.90002	2.503	2.5423	2.83653	2.52725	2.57008	2.48017	2.46159	2.98583	2.64495	2.39859	2.76452	2.60188	2.2599	2.40914	2.68104	2.75167	2.57375	2.57497	3.12847	2.3206	2.38304
APLN	7.03702	5.82028	6.8999	7.13055	6.76404	5.51283	5.73827	5.97081	6.94282	6.87362	6.31018	5.85815	6.71747	6.17724	8.51282	7.09398	5.4825	6.43159	6.5503	7.29965	6.5711	5.48269	6.81979	5.3524	6.3067	5.72695	7.57411	6.89948	6.57668	5.94243	6.43979	6.79581	6.3541	5.22794	6.85791	6.48838	5.94594	6.41467	7.50673	4.92944	7.2789	6.72361	7.97857	5.93473	6.28707	7.03931	5.84415	6.71348	6.0359
APLNR	10.959	5.61025	6.96975	10.8245	8.35222	8.50676	4.72392	7.16149	8.26849	9.24381	4.87123	8.62322	5.5567	4.96743	10.2294	4.54151	10.0311	10.8642	10.8844	9.83665	8.17905	4.67566	7.82567	6.5479	6.64188	4.77089	10.5721	6.16054	5.40606	6.78438	7.44289	6.55633	6.26621	8.41885	6.04079	9.03534	6.74237	8.61382	10.5711	6.03086	11.2129	6.48318	9.84153	5.06959	7.07445	5.76977	5.76109	8.73111	7.59365
APLP1	7.3334	7.65837	6.31906	6.15375	7.40361	5.10183	5.55259	5.08344	5.69177	8.17963	6.4271	7.67822	7.4047	5.99234	6.36055	5.43186	6.65592	6.13317	7.30585	6.77678	6.3233	6.86303	6.7761	5.60475	5.99114	6.03559	8.14709	7.57009	8.50507	8.57739	8.71156	7.82796	5.2066	8.73501	7.54463	8.62851	9.86055	9.83162	9.5698	6.77222	11.0838	6.77322	8.82952	9.22829	7.85778	6.24582	6.52159	8.4234	9.63594
APLP2	6.95936	5.59409	8.58607	6.89403	6.13445	7.09249	7.31749	5.79916	6.64743	6.65	6.33673	6.42791	6.07394	5.96361	7.57209	6.33037	7.5022	6.12099	6.96783	7.17508	7.34144	5.70322	6.12198	7.28882	7.17767	7.84639	6.9438	7.40646	9.52262	8.93486	8.56428	7.54183	7.65416	7.63709	7.94491	8.20617	8.13685	7.83756	8.23171	8.24183	6.70262	7.16018	7.22855	5.80889	6.90412	6.98472	7.65883	6.79305	6.61427
APOA1	4.1874	4.16951	4.69846	4.1551	4.26271	4.31008	4.71545	4.01557	3.94387	4.14044	4.05831	4.39748	4.37231	4.30615	4.24504	4.63128	4.04494	4.13751	4.12058	4.20203	4.2507	4.30632	3.99042	4.18669	4.06959	6.19592	4.31804	4.5514	4.65593	3.86008	4.18135	4.46546	4.08319	3.97939	3.86764	4.06013	4.4356	4.29069	4.07175	3.76768	4.02658	4.20911	3.81755	3.94826	4.22136	3.49982	4.51154	4.35791	4.81787
APOA1BP	9.05971	8.75278	7.64608	8.49972	8.76817	9.30552	9.07343	8.07493	8.58387	8.97144	9.74466	9.37912	9.21841	9.1589	9.08425	9.2996	8.72155	8.88039	10.1302	9.07215	9.44664	8.57159	8.52099	9.24915	9.43158	7.82194	8.73939	10.1762	7.03989	9.51414	8.57356	8.63312	8.7617	10.6247	9.44459	10.4846	9.50673	9.69623	9.35103	8.367	9.53232	8.95999	9.0244	9.36178	10.4421	8.09579	9.31386	9.04466	9.01175
APOA2	3.69702	3.69577	3.66411	4.04939	3.5273	3.68503	3.63616	3.70994	3.53116	3.90862	3.5527	3.55221	3.631	3.59963	3.54315	3.89483	3.56141	3.60626	3.53034	3.51324	3.6365	3.37919	3.61515	3.47078	3.81985	3.63915	4.14064	3.90843	3.71893	3.41385	3.61375	3.25466	3.94801	3.71174	3.33058	3.36284	3.70718	3.62718	3.3674	3.41134	3.18582	3.62852	3.3637	3.58836	3.99191	3.30381	4.12179	3.69312	4.275
APOA4	4.63425	5.14386	5.06558	5.03812	4.99249	4.92496	5.09045	5.07925	5.06591	4.92591	5.00566	4.98292	4.92572	5.07626	4.79076	5.13007	4.81524	4.86909	4.70279	4.86454	4.84494	5.207	5.32726	5.04827	4.91798	5.10729	5.29673	5.29183	5.69973	4.79852	5.22918	5.12857	5.38269	5.39011	5.38359	5.37471	5.29622	5.2863	4.99819	4.82417	4.95445	5.2939	4.92513	5.13479	5.33994	5.53834	5.46062	5.16063	5.51069
APOA5	6.18369	6.59922	6.44994	6.34391	6.29822	6.18406	6.43166	6.21655	6.3678	6.28482	6.4964	6.09834	6.26434	6.1725	6.04723	7.16586	6.59585	6.06755	6.10934	6.1107	6.56286	6.40265	6.35754	6.40808	6.43377	6.53287	6.25926	6.35329	6.38	5.83651	5.98146	6.0519	6.24546	6.08564	6.03851	6.06721	6.24919	6.01151	6.07904	5.93018	5.95071	6.11161	6.02258	6.10317	6.09808	6.13222	6.17419	6.14373	6.3238
APOB	3.52177	3.45611	3.77655	3.60014	3.48781	3.67597	3.89704	3.44598	3.44497	3.55776	3.53083	4.21468	3.50152	3.70658	3.319	4.09447	3.6192	3.57933	3.40103	3.53494	3.49501	3.60719	3.58818	4.08136	3.52944	3.4481	3.85557	3.8476	3.52685	3.12345	3.64532	3.36716	3.28111	3.33195	3.128	3.31134	3.21771	3.58101	3.36565	3.02473	3.32046	3.42391	3.3064	3.27672	3.39532	2.95453	3.30781	3.54199	3.60248
APOBEC1	4.07239	4.03082	4.08566	4.215	4.01026	4.07821	4.0821	3.9453	4.03628	4.16893	4.00064	4.4167	4.04838	4.35534	3.96763	4.39818	4.14753	3.97008	3.97107	4.10434	4.2765	4.30326	4.10707	4.0431	4.23243	4.03298	4.0167	4.16213	4.215	3.96756	4.09823	4.28957	4.24462	4.21629	3.81957	4.07325	4.90333	3.76157	3.88178	3.87397	4.25497	4.17122	4.08625	3.90208	3.81691	4.16029	4.21426	4.40362	4.17737
APOBEC2	4.66906	4.52568	4.88944	4.56411	4.48718	4.6872	4.93407	4.60446	4.83272	4.56131	4.55716	4.76666	4.63737	4.48278	4.56283	5.27756	4.771	4.54543	4.47939	4.70611	4.86674	4.80015	4.58667	4.89824	4.48431	4.43629	4.81121	4.71121	5.6473	4.9959	4.99615	4.96687	5.32474	5.03731	4.85498	4.76308	5.06756	4.90219	5.06011	4.53315	4.69275	5.18692	4.79363	4.71794	5.25419	5.03839	4.98505	5.15732	5.01077
APOBEC3A	2.61034	2.52636	2.65749	3.78725	2.78419	2.7906	3.06355	2.73189	2.56178	2.68276	2.55811	2.85704	2.68214	3.79616	3.50667	2.61894	2.57083	3.69974	2.90786	3.71032	2.85897	2.68627	2.68431	2.73023	3.17074	3.46503	2.63314	4.88588	2.66421	2.86787	2.68756	2.99395	3.06846	2.53639	2.85922	2.76733	2.54563	2.53985	2.56783	2.62628	2.50532	2.95847	2.83036	3.00796	2.45292	2.89138	4.05652	2.64575	2.55206
APOBEC3B	4.3423	3.60526	3.53736	6.35158	5.78312	5.35981	7.55576	4.92076	5.36902	7.94927	4.77028	6.47817	7.90199	8.06561	5.57842	3.72562	7.80471	6.76903	4.15534	5.67658	3.87272	5.45894	7.99569	6.51816	5.42024	7.85027	5.3455	7.75514	4.59136	7.86491	3.60919	4.58422	6.90881	3.40103	4.63529	5.18579	4.25066	3.21216	3.6929	4.26699	3.67183	3.28718	5.48641	4.60998	5.17544	3.56674	8.80245	4.71687	3.10978
APOBEC3C	4.75023	4.99288	5.57815	5.43092	4.85322	5.10158	5.87924	4.92328	5.18399	5.29743	4.73997	5.3138	5.35539	5.30973	5.18036	4.97014	6.26557	5.05271	6.6884	5.82049	5.54854	4.59884	5.21409	5.12851	5.24018	7.04461	5.68094	6.75857	5.98033	5.13505	6.15187	6.01583	5.78798	5.7625	5.65864	5.80936	5.5744	5.83251	5.62947	5.8029	5.85563	5.52269	5.61188	5.17871	5.1018	5.05687	7.6971	5.11635	5.41157
APOBEC3D	3.97987	4.26689	4.1041	3.94122	4.05314	3.73947	4.23476	3.96158	4.09556	3.90304	4.0873	3.99177	3.93321	4.12006	3.95135	4.42434	4.05342	3.88332	4.05864	3.98399	3.99792	4.05741	3.95776	4.03238	4.07153	4.07896	4.12292	4.57308	4.88727	4.49551	4.04779	4.58298	4.31917	4.14485	4.09373	4.08721	4.18678	4.44337	3.93003	3.79058	4.09378	4.42988	4.11226	4.06092	4.37107	4.15863	4.05761	4.29844	4.12772
APOBEC3F	5.61883	4.7424	5.62424	5.89051	5.10704	4.60503	5.38224	4.51742	4.52244	4.87448	4.55371	5.42819	5.26103	5.2617	4.92438	5.0357	5.43454	5.48373	5.31362	5.25088	5.321	4.59742	4.96928	5.59853	5.27464	5.83401	5.44467	6.38552	4.90283	4.21583	4.77418	4.80651	5.01197	4.50949	5.00075	4.92928	4.25471	4.52481	4.38552	4.49792	4.8761	4.06147	4.97507	4.15116	4.24229	4.22586	5.61849	4.92357	4.53796
APOBEC3G	7.34623	5.59505	6.48752	8.2187	6.04601	6.60527	7.85269	4.08634	5.20085	6.27018	4.48203	7.37792	6.6969	6.25042	6.54898	5.30241	7.79867	6.9569	7.02739	7.54482	5.94801	4.26769	7.04791	6.98017	6.85777	8.30675	7.21458	8.45725	5.33666	4.67753	8.35599	5.55735	5.20878	4.47151	5.37242	5.85254	5.31797	6.02318	5.8495	6.11477	6.13038	4.13928	6.99597	5.34627	4.49469	4.00146	7.38992	4.81367	4.36802
APOBEC4	2.80426	3.0903	3.13931	3.64596	2.96943	3.03207	3.08406	3.48603	3.20999	2.92925	3.07216	3.08748	3.00279	2.95402	3.1123	3.67686	3.21772	3.16837	3.10187	2.9699	3.314	3.36995	3.15321	3.11265	3.16001	3.32345	3.09439	3.23317	2.97675	2.81262	3.32455	3.23123	2.98342	3.16673	3.02797	3.15689	3.0967	2.69758	2.8054	3.05645	3.06984	3.18978	2.92665	2.80561	3.17578	3.11495	3.19411	3.17287	3.06972
APOBR	4.90847	4.98938	5.33167	5.48288	5.03852	5.37629	5.87878	4.94625	5.22824	5.26443	4.9558	5.38406	5.1035	5.22541	5.1987	5.27362	4.89745	5.41061	4.99369	5.37604	5.33155	4.81607	5.01728	5.21004	5.0653	5.47754	5.27815	5.28335	5.09645	4.84336	5.65331	5.13916	4.95462	4.85121	5.21899	5.04148	4.75365	5.16521	5.22031	5.07034	4.80896	4.84237	5.07738	4.28423	4.93123	4.92786	5.24491	5.40553	4.72105
APOC1	9.20555	9.18007	9.82127	9.35715	8.90506	9.80355	10.2326	8.04048	8.47631	9.5964	7.58464	11.0279	8.5241	7.86054	9.4666	8.44011	8.92003	6.62454	8.85362	10.1437	9.52368	7.2219	9.2305	9.88654	8.78211	9.25373	10.674	9.70764	7.10889	7.46412	10.973	8.71314	7.15306	8.60331	9.23281	10.2322	8.84693	10.3041	10.62	9.52291	9.75114	8.86986	11.3871	6.80241	8.46876	7.80928	7.08756	9.73767	9.27136
APOC2	9.70445	7.83986	8.9857	8.41233	8.5488	9.1128	8.20313	5.73887	7.06744	9.3499	7.40074	10.3607	8.67636	7.66539	8.62604	7.55551	7.68162	5.44013	7.56734	8.53446	8.2643	6.52294	7.61894	7.92184	7.92777	8.37524	8.72566	7.28026	7.40365	7.20206	8.2772	8.23847	6.15968	7.03314	8.35225	8.14347	7.6752	8.36554	8.67096	8.33755	8.2177	7.32994	9.41036	6.61918	7.87308	6.25013	6.48393	7.16915	7.41919
APOC3	4.56724	4.38757	4.87918	4.35211	4.52422	4.62358	5.04038	4.24899	4.58151	4.44796	4.40087	4.27457	4.25835	4.68102	4.08479	5.10903	4.54957	4.45972	4.47005	4.12863	4.53526	4.34816	4.4489	4.79645	4.23236	4.51235	4.71237	4.53227	4.35837	4.13359	4.66297	4.41739	4.2967	4.12895	3.59365	4.03029	3.85668	4.84036	3.94854	3.84665	3.80139	4.01365	4.04901	3.91565	4.25392	3.9483	4.53704	4.02189	4.31036
APOC4	4.16725	4.59936	5.25862	4.66225	4.08141	4.70148	5.34295	4.22311	4.58942	4.81055	4.11933	4.34962	3.99409	4.66355	4.60725	4.93023	4.48558	4.5768	4.39016	4.53855	4.66994	5.0665	4.70902	4.61225	4.4275	4.49126	4.8575	5.5031	5.45563	4.46892	4.92484	5.23894	4.8989	4.70979	4.675	4.54111	4.55712	4.76366	4.52352	4.36725	4.74342	4.86545	4.834	4.59994	4.71747	4.66644	4.80469	4.76149	5.10689
APOD	7.26175	6.50799	8.62187	8.19381	7.76405	4.45289	5.12813	5.98946	5.07364	6.76823	6.59134	8.15016	5.31108	3.65	7.8393	4.11179	9.71348	2.74521	12.5277	11.7123	11.7873	3.68987	8.78541	7.37406	9.59313	4.91401	8.68084	5.2602	10.8722	10.4108	11.4673	7.53892	6.5106	10.6983	8.44445	10.1147	12.2017	11.0291	11.4746	10.1742	12.1184	6.95556	10.7386	4.14514	11.1372	3.75063	5.19483	10.3641	8.71705
APOE	10.0773	8.96322	9.40699	10.2935	9.18153	9.55367	9.691	8.98316	10.3349	10.1711	8.0511	10.781	11.24	8.57938	10.6034	8.61777	8.99816	5.95507	11.0483	10.7066	10.1912	6.90186	8.64175	9.36142	8.51343	9.20177	9.82827	8.41046	7.81245	9.48807	11.7063	9.06078	7.71369	10.4936	11.05	10.2998	10.5085	10.4892	11.4768	11.0433	11.7389	8.95265	11.1369	7.89662	9.843	10.0462	7.22647	10.2622	11.0012
APOF	3.24276	3.09221	3.0706	3.07409	2.95791	2.98529	3.17004	3.25257	3.11251	3.17842	3.15397	3.05811	3.09633	3.09569	3.31532	3.04148	3.20836	3.24635	3.02866	3.08778	3.03112	3.06366	3.11454	3.27516	3.02754	3.08052	3.34958	3.42874	3.0862	2.90485	3.09846	3.44598	3.30931	3.13574	3.08486	3.11742	2.93178	3.21068	3.05955	2.71192	2.85837	2.89749	2.82604	3.26195	2.85901	3.2906	2.96361	3.17091	3.04156
APOH	3.76491	3.59264	4.0897	3.586	3.60865	3.47316	4.2094	3.86188	3.6189	4.12439	3.80017	3.7289	3.5817	3.66335	4.80275	4.45868	4.40035	4.67446	3.49166	3.58481	3.59579	3.65888	3.58424	4.08363	3.70067	3.64002	3.93401	3.46536	3.95106	3.34964	3.65473	3.82392	3.56873	3.56441	3.59135	3.53016	3.62001	3.60913	3.48612	3.37566	3.62153	3.20844	3.45513	3.40377	4.08297	3.95654	3.94957	3.93415	3.70409
APOL1	6.0632	5.5489	6.05112	8.22166	5.53825	6.12742	8.3112	5.38944	5.37601	6.52685	6.3638	5.89119	5.70084	5.74406	6.30362	5.52009	6.04798	6.94273	6.0083	7.45928	6.06357	5.43551	5.79175	5.72286	7.19796	6.91556	6.71286	7.01613	5.82844	5.33402	6.41138	5.46548	5.41904	5.51186	5.56695	5.63702	5.42027	6.2362	5.34465	5.60659	5.63006	4.99598	6.43393	4.82671	5.24414	5.3756	6.95504	5.15111	5.37542
APOL2	7.39493	6.90252	9.13595	8.83722	6.66017	7.51036	8.91866	5.92302	7.32537	8.05014	7.58057	7.412	7.09155	7.2286	8.06173	6.74884	7.22757	7.67456	7.62139	8.47763	8.37681	6.41887	7.2565	6.89269	7.14309	7.49471	8.36482	8.48626	7.32109	7.20557	7.70402	7.93203	7.75205	7.00789	7.59158	7.35618	7.59098	7.90404	8.17252	6.61733	7.06083	6.30141	8.08801	6.20279	6.39687	6.87226	7.93042	7.38149	7.42733
APOL3	5.26621	4.76713	5.3616	7.33387	4.82305	4.90408	5.63644	4.30632	4.76069	5.49024	5.11626	5.65699	5.14196	5.44552	5.6969	4.73287	5.18662	6.53556	5.62746	7.26867	5.65182	4.39237	5.83766	4.37874	5.85674	7.12217	5.56921	6.66324	4.40864	3.84361	5.71137	5.45561	4.84248	5.01694	5.25069	4.8725	5.90626	5.70137	5.31301	5.43706	5.88799	4.93392	5.9606	4.20102	4.5818	4.57909	6.49368	4.47864	5.26595
APOL4	5.46286	3.99768	4.04383	5.12577	5.47423	3.6656	4.43345	3.61139	4.17935	4.22328	4.05083	4.89638	4.51246	4.88463	5.92192	4.58185	4.25194	4.66607	3.83873	4.22326	3.76286	3.83663	3.87281	4.24146	4.57938	3.88522	3.74994	4.28647	4.07821	6.02217	4.48626	5.07612	4.34056	4.19208	4.01588	3.89556	4.64211	5.44334	6.71572	5.61211	4.16937	3.45869	5.27008	3.86236	4.67503	4.4045	4.36373	3.84914	4.03566
APOL5	3.72005	4.16703	4.36539	4.20838	3.92594	3.99277	4.24968	4.15597	4.19309	3.86005	3.82712	4.26715	4.00648	4.1792	4.16819	4.7008	3.98828	3.99851	4.15597	4.08075	4.18031	4.2625	4.05689	4.16029	3.8319	4.11926	4.38946	4.42034	5.11474	4.10571	4.35711	4.17164	4.33422	4.19783	3.98389	4.14811	4.20014	4.39417	3.72079	3.88418	3.83541	4.46049	3.98336	3.85764	3.95816	4.38537	4.18218	4.27398	4.07142
APOL6	5.2255	3.40559	4.13652	5.39837	3.82011	5.4591	4.34822	3.61917	3.98073	3.69444	4.28674	4.22191	3.91556	4.4295	3.91618	3.73358	3.88942	4.30124	5.08197	5.40081	4.80086	3.43618	5.41226	3.71276	4.25734	4.34953	4.02426	7.34096	3.90558	3.67997	5.82439	7.26428	6.21678	4.95364	5.7588	5.35784	4.63222	6.61667	6.42906	5.14122	5.72536	3.72366	5.9552	4.45997	4.24987	4.35069	7.45963	4.20973	4.38807
APOLD1	6.717	7.98496	8.03476	8.87803	9.55518	8.79096	7.91632	8.57281	10.097	8.64929	7.58692	9.01573	9.13794	8.61484	10.3868	8.36098	8.05753	6.97493	8.82621	9.3653	8.18036	8.55077	8.83011	6.92769	8.56042	6.93934	10.1159	8.92904	8.16514	9.84189	9.00637	8.44122	9.68707	8.28774	9.00424	9.7654	10.1204	8.76217	9.68976	8.65409	8.62667	9.03347	10.1546	6.69377	8.95705	8.27294	6.91656	9.28243	9.83081
APOM	4.90293	4.83818	4.55892	4.95798	4.9658	4.77163	4.8653	5.46431	5.09309	4.93286	4.62241	5.68967	5.73544	5.86394	5.34408	4.97629	4.93	5.69419	4.96594	4.86712	4.14166	5.26846	5.34321	6.05694	5.74482	4.87913	4.79292	4.16468	5.31277	4.81015	4.87221	4.66284	5.28484	5.02654	4.84354	4.92796	5.17903	5.19684	5.03189	4.99777	5.07641	4.9266	4.56113	4.47672	4.68015	5.07871	5.00273	5.0059	5.0269
APOO	9.00802	8.46349	7.03001	8.52975	8.64742	8.56592	8.05143	7.41946	7.4794	8.53305	8.92076	8.60263	9.41002	9.09947	7.94864	7.24076	7.49189	8.58461	7.67157	7.82787	7.49623	8.7651	9.03584	8.78195	8.74766	7.71335	7.14263	8.21954	7.12109	8.09193	7.6354	8.05742	7.27677	7.89911	8.30739	8.51071	8.85806	7.82011	7.76537	7.55608	8.16645	7.96144	7.88699	8.61323	8.6295	7.63624	7.84926	8.0024	8.39352
APOOL	6.0322	4.65084	4.4795	4.30611	5.22914	5.36419	3.90892	6.06653	4.63862	4.88129	5.20733	4.75343	4.91969	4.93136	4.05238	3.65992	3.81204	5.33622	5.93341	4.95928	4.24325	4.8617	6.03695	5.35637	5.08657	4.72774	3.97327	4.13496	5.11509	6.73994	6.24884	6.0226	4.86856	7.05737	4.53384	6.61497	7.2586	5.23339	7.66237	7.55167	7.23036	6.55852	6.74224	7.41396	7.30679	5.08411	7.29641	6.03665	6.6432
APOPT1	7.30106	8.11554	8.85502	8.17052	7.24321	7.74176	9.06463	8.09534	8.59818	7.47476	7.53034	7.40194	7.06322	7.21068	7.92501	8.12062	8.08112	8.07171	7.40471	7.54021	8.65177	7.61012	7.58434	6.89877	7.55226	7.50903	8.17299	9.05413	8.99855	8.73105	8.8439	8.97568	9.42288	8.62353	8.68284	8.70998	8.6342	8.77616	8.48447	8.88278	8.4596	8.98341	8.57955	8.95714	8.39652	8.7735	8.3732	9.07756	8.845
APP	10.5977	10.9014	10.9892	11.4683	11.2928	10.9906	8.77813	11.3763	10.1805	11.2588	11.3476	11.769	9.7987	9.34513	11.0277	10.5734	11.9348	10.9031	12.2054	11.72	11.8803	10.3789	10.5964	10.1123	11.7448	11.0977	10.9246	8.12094	9.57743	8.88277	10.4742	9.10278	8.71496	10.1173	10.4553	9.87498	10.6565	9.91341	10.0493	11.1216	10.9824	9.55556	9.89899	10.3841	10.3508	10.1921	9.8719	9.27906	10.7904
APPBP2	6.96852	7.05292	6.83665	7.16121	7.0524	7.4936	7.86273	7.56077	7.50438	7.10542	7.65496	7.02062	7.43312	7.05744	7.21213	7.21046	8.23344	7.5749	7.87299	7.14129	6.92535	7.71668	7.1734	7.45467	7.48615	6.90399	7.21103	7.83157	6.1513	6.73977	6.24635	5.53412	7.04096	5.62464	6.77542	5.76399	5.56398	5.89527	5.58625	6.67944	6.68124	7.16842	6.89971	6.5864	6.80907	7.45731	7.62928	6.56061	6.63085
APPL1	8.6537	8.56744	7.69593	8.25053	8.80431	8.39675	7.67439	8.84103	8.64039	8.46675	8.66865	8.41786	8.98763	8.40503	8.79961	7.79678	8.49556	8.91526	8.75549	8.47313	8.18424	9.00679	9.06206	8.59785	8.78357	7.8065	7.58467	6.31458	5.79487	7.25885	6.08675	6.61396	6.35122	7.16677	7.22707	7.13363	7.01424	6.65766	7.37342	7.27218	7.27283	7.44322	7.53676	7.53789	8.09325	7.62384	6.95806	7.97788	7.86729
APPL2	7.11443	5.13523	4.91099	6.2032	6.57491	6.15798	6.60199	7.31595	6.03002	6.43603	7.3477	6.52344	6.29897	5.51401	6.87481	5.22606	6.27241	5.79968	7.68037	6.55275	6.33482	6.02759	6.5355	6.7661	6.0309	5.75795	5.75413	5.3712	4.65953	8.01899	7.37336	7.10272	6.27232	9.02779	8.30876	8.27123	7.50658	6.71572	8.07331	8.86085	8.21916	8.2362	7.52123	6.5939	7.74276	7.83804	6.59239	6.81223	7.41949
APRT	7.34895	7.45788	7.56098	7.968	7.21971	7.38318	8.68359	7.10557	6.99387	7.63374	7.72273	7.73108	7.14366	7.63179	7.05824	8.40571	8.31861	7.36192	6.9314	7.59768	7.6193	7.95117	8.05123	8.63167	8.32185	8.66097	8.02432	8.34255	7.37076	6.5156	8.05286	6.79581	6.97219	7.97283	7.99057	8.31966	7.54123	7.98921	7.23509	7.53858	7.24534	7.19134	8.20815	6.90261	8.84179	7.00313	9.33384	7.2634	6.69769
APTX	6.27329	6.18749	6.4968	6.69434	6.94551	7.08511	6.5492	5.80824	6.62376	7.03062	6.59863	6.50852	7.5417	7.40377	6.03963	6.77106	6.27177	6.82139	5.84058	6.41055	5.69254	6.60997	7.25396	7.25751	6.18826	7.7863	6.44076	5.83913	5.47467	6.57933	6.14059	5.98508	5.81416	6.52057	6.03085	6.44234	5.90123	6.2486	6.65074	6.4853	6.48052	5.45098	6.26237	6.39826	7.12691	6.86828	7.17132	7.11588	5.30135
AQP1	9.50419	6.91196	5.54017	10.6579	9.91907	8.3825	4.59276	4.0944	10.2515	8.2918	6.84154	11.4251	8.29144	11.3535	11.512	9.74777	7.3278	8.6441	9.68878	7.04378	5.3785	3.83664	7.19072	8.56822	4.5876	5.72378	9.95907	6.95209	4.98167	8.8627	7.36902	10.0379	8.57677	10.4179	7.36233	8.83594	6.84511	8.83537	12.4742	5.76561	11.4431	6.55355	8.76733	9.04876	4.90424	9.11308	5.45433	9.08065	9.82939
AQP10	3.59657	3.93854	3.89445	3.45954	3.719	3.69695	3.72225	3.82552	3.61645	3.41334	3.76498	3.83636	3.63351	3.60845	3.65457	3.91582	3.88024	3.44368	3.5069	3.41219	3.50155	3.7589	3.64655	3.7821	3.8579	3.60503	3.55456	3.96261	3.93246	3.49037	4.03815	4.20202	3.71851	3.4438	3.47831	3.99076	3.79299	3.94925	3.74149	3.57654	3.51906	3.60769	3.31773	3.89583	3.57954	3.86168	3.4967	3.75525	3.49916
AQP11	5.75125	5.35676	4.24686	6.08591	5.40881	5.50512	5.17344	6.2137	5.3811	6.49202	6.23099	6.35051	5.19386	4.69175	5.82643	5.10903	5.73167	5.73438	6.20799	4.8953	5.07119	6.72649	4.99885	5.38153	7.95402	4.43	4.95051	5.83017	3.85252	5.64026	5.04408	5.24862	4.44303	5.19347	5.36005	5.17546	5.12449	5.06285	5.4321	5.34696	6.10468	5.13364	4.49314	6.38425	5.27829	5.52045	4.7356	5.06026	5.62751
AQP2	5.36263	5.43418	5.56316	5.48033	5.16907	5.18701	5.54105	5.13297	5.35942	5.34883	5.20494	5.29624	5.33851	5.24263	5.54629	5.34765	5.19872	5.38953	5.42518	5.36409	5.55245	5.4456	5.40058	5.2622	5.26695	5.37509	5.65554	5.97057	6.0316	5.23874	5.55259	5.51243	5.52619	5.45175	5.3229	5.53894	5.52937	5.59042	5.40292	5.16514	5.45805	5.44986	5.84034	5.72521	5.48809	5.40116	5.77948	5.91859	6.0226
AQP3	3.39198	3.77841	3.98858	3.76752	4.45436	3.47169	3.54472	3.11732	3.38739	3.98594	3.60483	3.39298	3.69501	3.53714	3.36978	3.46612	3.62	4.3428	3.40398	4.24453	3.62623	3.39192	4.49234	3.39947	3.95242	5.01379	4.08555	3.38258	4.72276	3.81954	4.2278	3.50591	3.78523	3.40056	3.22589	3.54924	3.76703	3.81795	3.33307	4.66698	3.22796	2.86773	4.75132	3.20582	3.3514	3.36142	3.70915	4.10414	3.25411
AQP4	13.7629	10.2459	12.3895	12.9403	11.8096	12.1433	6.19537	11.7603	10.8883	12.8286	10.4357	13.0278	12.2092	12.5682	13.3111	11.5869	11.9557	12.7373	13.538	11.9845	12.23	11.954	11.449	12.4918	12.2279	5.02863	12.0204	11.6355	8.70857	11.4387	11.5905	12.8557	9.28981	11.9427	11.1782	10.8845	11.8901	11.3378	12.9815	7.86912	13.0237	10.5983	11.1731	9.5454	4.25535	12.5984	2.68859	11.1446	12.7855
AQP5	5.02921	4.25914	4.34647	4.23526	4.76136	4.27955	4.36107	4.16093	4.27408	4.22139	4.38981	4.13004	4.4162	4.36728	4.19473	4.45126	4.22366	4.29116	4.42048	4.16573	4.29368	4.20279	4.36107	4.49267	6.37957	4.69678	4.11221	5.26986	4.849	4.3206	4.52807	5.19442	4.50052	4.67238	4.50952	4.84013	4.74702	5.25324	4.64816	4.49623	4.76434	4.13916	4.7596	4.58166	5.09859	4.49878	4.7015	4.54743	4.39596
AQP6	6.11414	5.76594	6.39666	5.86603	5.91034	5.56867	6.029	5.77734	6.00473	5.65592	5.78076	5.73321	5.69269	5.61844	6.01407	6.28405	5.62604	5.69089	6.48859	5.80747	6.3534	5.79861	5.78855	5.59037	7.04392	5.46637	5.68387	6.31288	6.71943	6.23875	6.14335	5.81343	6.14887	6.532	5.75262	6.19694	5.85977	5.87091	6.41363	5.55855	6.30728	5.99715	5.82	5.53023	5.99542	5.96599	5.83919	6.21615	6.48417
AQP7	5.3035	5.62779	6.43614	5.6431	5.55771	5.70159	5.8433	5.28728	5.37523	5.60928	5.45351	5.59529	5.47389	5.63429	5.72545	5.74121	6.28441	5.52072	5.54651	5.70366	5.48681	6.06755	5.77151	5.43602	5.73228	5.77842	6.02935	5.68741	6.27502	5.17318	5.52843	5.26004	4.9474	5.15508	5.62034	5.68533	6.03948	5.30686	5.11021	5.41878	5.37406	5.54186	5.34967	5.51212	6.50538	5.17648	5.59516	5.36599	5.80436
AQP8	3.65881	4.11172	4.48415	4.10087	3.89503	3.76273	4.10325	4.16395	4.11183	3.81648	3.9672	4.03265	3.82371	3.81778	3.77448	4.49545	3.88314	3.68384	3.76958	3.84179	4.03372	4.08681	3.9137	3.90093	3.99613	3.89876	3.98288	4.60961	4.3327	3.81227	4.04851	3.89876	3.95415	3.97247	3.96597	4.53151	3.91588	4.33873	3.91404	3.7604	4.08852	4.2744	4.13293	4.16966	4.1004	3.80954	4.18442	4.21349	4.1196
AQP9	5.20509	4.64319	5.2865	6.44693	4.60197	5.38676	10.5124	4.43848	4.54351	6.13307	5.05569	5.05487	4.9541	4.94769	6.38187	5.76469	4.92866	5.4108	5.47501	7.42384	4.88425	4.30887	4.95228	4.82935	5.82211	7.46107	5.95921	4.3354	4.43587	4.54272	6.09057	4.66435	4.02766	4.41975	4.56886	4.25707	5.42937	4.98015	4.3903	4.01111	4.26384	5.00763	5.74564	3.97834	4.59324	4.56937	5.56799	4.48012	4.99875
AQPEP	2.75569	2.64496	3.07153	2.73863	2.77509	2.82885	2.81003	2.73686	2.89822	2.7386	2.60454	2.61779	2.7368	2.56219	2.64575	3.10345	2.78813	3.00541	2.61007	2.8433	2.89257	2.57761	2.54465	2.73015	2.65413	2.6038	3.03055	2.71641	2.6709	2.81336	2.83807	2.77268	2.86896	2.77872	2.91053	2.81141	2.81638	2.59227	2.69416	2.61542	2.63885	3.03245	2.79617	2.79708	2.88333	3.19327	2.88441	2.54039	2.66163
AQR	2.77754	2.7197	3.12651	2.56541	2.7699	2.85563	3.11591	2.93127	3.15259	2.40099	2.82644	2.4195	2.39149	2.71551	2.80317	2.55758	2.91256	3.12905	2.54155	2.5823	3.05369	2.79101	2.62976	2.57537	2.73209	2.8031	2.54989	2.75989	3.34912	2.94595	3.08115	3.21547	4.57977	3.40984	2.99493	2.87494	2.79482	2.87899	3.37412	4.31351	2.96865	4.57137	3.33121	3.34492	3.86926	4.03755	4.23415	3.19485	3.64776
AR	9.05776	6.7785	8.37969	8.10709	8.21227	7.76666	4.51778	8.33921	6.71905	7.19885	6.41776	9.06849	5.0432	4.85237	8.60845	6.00719	7.78224	8.20701	7.75635	6.79857	6.97082	4.07968	7.11824	9.09598	4.46977	7.43929	6.03597	4.39274	5.83873	5.11397	5.65534	8.59243	7.24392	4.2196	6.45074	5.69281	6.21565	5.80187	7.65045	4.18378	5.91228	9.58079	5.61589	5.03058	7.01801	7.48112	5.60306	5.25308	5.63055
ARAF	6.48507	4.88659	4.85584	5.59889	5.95006	5.42178	4.95333	6.39611	5.41664	5.78595	7.02964	5.55444	7.26627	6.8621	6.08252	5.54262	4.34495	6.22805	6.32803	5.91444	4.61218	5.36553	5.84906	5.36656	5.33087	4.95235	5.13641	5.00076	4.82921	6.61367	4.40032	4.99167	5.04311	4.31884	5.10898	4.65409	5.11109	4.64613	5.43593	5.13804	5.61959	5.13877	4.79409	5.33918	5.80317	6.53018	5.45225	5.24911	5.24396
ARAP1	7.15997	6.7097	8.17461	7.37896	7.17157	7.36294	8.07006	6.68502	7.38946	7.16302	7.14874	7.74024	6.45864	6.50081	7.16988	7.1543	6.9233	7.20601	7.72341	7.85723	7.85848	6.84729	7.36744	7.0176	7.42705	8.01997	8.03866	7.64212	7.4305	7.02671	7.93036	7.56538	7.6399	7.28388	7.57954	7.63198	6.9419	7.3821	7.57002	6.96632	7.55249	6.53385	7.76025	6.94481	7.00376	7.10712	7.94741	6.66102	6.84186
ARAP2	9.71482	5.55372	7.91449	8.47074	7.75927	9.10611	7.26092	9.55418	9.65659	7.8127	8.34998	8.18615	6.16395	8.15148	8.74519	6.15471	7.37693	7.32357	8.46914	8.99534	7.85614	7.18198	5.66082	7.36606	7.49843	4.65884	8.53951	8.66596	7.35194	7.62427	8.33334	8.88895	8.22849	6.24433	7.77386	7.99489	7.37683	7.78082	7.69065	5.42611	9.78865	9.11643	7.28984	5.31141	3.96151	9.41234	3.2483	5.31986	9.7263
ARAP3	6.8621	7.36801	7.72002	7.26002	8.06653	8.41015	7.06995	5.74207	8.19398	6.61631	6.88524	6.74057	7.08228	5.81319	6.27575	5.88436	8.16463	5.1272	5.65577	6.51319	7.6042	5.26083	7.78652	8.0123	8.43707	8.81623	7.66346	7.79206	10.2898	7.8287	9.60532	7.3053	7.27939	7.80912	8.55348	8.23993	7.21676	7.78061	6.73065	7.96846	6.74796	8.03377	7.72881	5.53061	8.81912	7.09913	8.48227	6.97722	5.30444
ARC	5.29189	8.21478	8.20906	7.14868	9.55018	6.77721	6.20607	5.73909	7.50675	6.59122	6.66331	7.02881	7.17726	6.53112	7.05237	8.49187	6.22481	5.09664	5.9552	7.27247	7.04716	5.3847	8.84755	7.31498	6.00383	7.03521	6.84003	6.01312	9.50083	10.3478	8.11761	8.19245	8.37583	8.86113	8.57027	9.67677	10.203	10.3267	8.25867	6.70012	6.18622	3.9754	7.6641	5.3364	8.1315	7.24583	6.64681	9.59616	7.07729
ARCN1	9.12483	8.77393	8.29224	9.46059	9.39192	9.53297	8.9357	9.20777	9.11364	9.59628	8.98076	9.79367	9.15119	9.55156	9.53737	9.11712	8.78918	9.16269	8.97571	9.54552	9.16141	9.13287	9.91249	9.28129	9.45597	10.097	9.35737	8.43432	8.44809	9.21914	9.16914	9.18816	8.9474	9.33706	9.37948	9.56985	9.03706	9.06585	9.32807	9.40896	9.23814	9.15522	9.30131	9.91612	9.6405	9.35965	10.0144	8.7837	8.78747
AREG	3.17827	3.62916	3.3837	4.71848	5.32962	3.41715	3.73259	3.32808	3.40849	4.06686	3.28438	4.10201	3.2679	3.59572	3.36457	3.27451	3.68474	5.16305	4.38656	5.1284	3.60876	3.51368	3.6771	3.42401	3.29388	8.62578	3.66087	3.38312	3.29954	4.29256	3.52618	3.30224	4.19082	3.35671	3.34484	3.32588	3.62423	3.35525	3.96762	3.90482	3.32728	3.38614	3.83114	3.24078	3.61012	3.34641	11.1009	3.58996	3.40451
AREGB	2.40804	2.46299	2.35766	2.67463	2.67208	2.53658	2.4631	2.5118	2.49132	2.57293	2.5847	2.63019	2.50302	2.62198	2.47629	2.47182	2.58331	2.73423	2.68137	3.52729	2.52657	2.4677	2.50999	2.46659	2.43453	2.77834	2.56329	2.79625	2.56454	2.57509	2.74205	2.4527	2.78886	2.46201	2.29254	2.51864	2.57753	2.44962	2.75796	2.68932	2.46406	2.47851	2.40013	2.71147	2.59154	2.44225	6.65347	2.56364	2.41208
ARF1	7.97408	8.59193	6.9492	8.2238	8.67328	8.31031	7.20373	8.73507	7.33586	8.11635	8.24628	8.2839	8.66628	8.55562	7.93999	8.46422	8.15207	8.33375	8.19695	7.97766	7.59334	8.57147	8.65678	8.60547	8.30315	8.27218	7.47705	6.77932	6.39408	7.76816	7.92458	7.91285	7.18426	9.09884	9.35555	8.94811	9.05025	8.28825	8.59883	9.61187	8.57906	8.72998	8.80145	9.78181	9.72076	9.16233	9.21309	9.04051	8.12852
ARF3	6.78273	6.44068	7.00368	6.60053	6.98568	6.12444	6.83197	6.29866	6.23658	6.42922	6.47546	6.2199	6.92044	6.0743	6.52416	5.98696	6.85027	6.50589	6.8282	6.55578	6.33554	6.00818	6.35163	6.3774	6.07636	6.16407	6.3531	7.29342	7.25317	7.22353	7.13382	6.55549	6.67147	7.52075	7.34427	7.57722	8.80379	7.12503	7.70421	7.28967	8.11052	7.16359	7.6136	6.70548	8.24594	7.14561	8.29334	7.09724	8.51856
ARF4	8.77485	9.36853	6.88476	9.60191	9.61214	9.76515	8.09755	9.47959	8.61804	9.6245	10.0476	10.0026	10.3808	10.0316	9.07247	9.30265	9.49783	9.0882	9.21282	9.25164	8.11651	9.13128	11.2248	9.31562	9.23049	9.76165	8.71755	7.16162	6.09201	8.64132	8.15673	7.82479	7.36079	9.13451	9.38668	8.94649	8.33337	8.34409	8.6636	9.51147	8.30791	8.69132	9.20677	9.16602	10.0447	9.46502	9.45484	8.78293	8.0086
ARF5	8.61435	9.02599	8.80832	8.68131	8.73791	9.30332	9.17522	9.08416	9.09864	9.09667	9.18591	9.36896	9.22581	8.82625	8.34263	9.22371	9.09119	8.95397	8.55729	8.75958	8.63461	9.04868	8.88894	8.66659	8.88112	9.03957	8.87757	8.69395	8.39344	6.92326	8.14303	8.4656	8.46416	8.18529	8.51279	8.51387	8.41286	8.60188	8.19169	8.42781	8.29144	7.98015	8.32922	9.0439	8.59992	8.19945	9.07236	8.86666	8.35714
ARF6	6.56654	5.9715	6.02023	7.23267	7.37883	7.42567	7.32136	7.40038	6.73312	7.07836	7.64313	7.23931	7.51807	7.00415	6.74888	7.61854	6.82472	7.57653	6.6507	7.15563	6.45744	7.25867	7.22401	7.36315	6.86881	8.48189	6.84302	5.64229	5.79585	5.1123	5.92744	6.02918	5.95953	6.0333	6.54784	5.86902	5.95051	5.97821	6.1462	6.35622	6.21663	6.02254	6.96633	6.68554	6.93294	6.66108	7.66283	5.85545	6.4138
ARFGAP1	5.94902	5.99323	5.86692	5.42765	5.72521	6.13683	6.64939	5.6128	6.68625	6.01732	5.95449	5.96678	5.81982	6.00954	5.80693	7.11534	5.93287	5.58035	6.01426	5.97715	6.38924	5.79388	5.93217	5.69984	5.57094	5.85774	6.09075	6.41865	6.86998	6.11069	6.81235	7.0511	7.94381	7.07982	7.15404	7.01262	6.83371	7.09164	6.75666	6.37698	6.54722	6.92928	6.50997	6.52759	6.54802	6.80857	6.96073	7.06432	6.13422
ARFGAP2	7.37158	7.5527	7.94524	7.18992	7.63335	7.91154	7.90502	7.38762	8.2412	7.75294	7.43984	7.40029	7.08544	7.35981	6.80293	7.99344	7.39909	7.06251	8.05854	7.81261	8.16882	7.43511	7.65182	7.57303	7.62414	7.60192	7.88597	9.26761	7.65884	7.86567	8.0583	8.0085	8.19371	8.03581	8.51786	8.05396	8.18329	8.28596	8.20737	8.03466	8.66594	7.7477	8.15315	8.23224	7.678	8.14694	7.94323	8.023	8.31103
ARFGAP3	9.72809	8.86552	8.68225	9.39496	9.40358	9.12681	8.52975	9.38592	9.38603	9.31188	10.1125	9.06053	9.13168	9.65122	9.39495	8.46872	9.36708	9.98506	9.68671	9.66198	8.87466	9.98324	9.43907	9.09574	9.95038	8.99462	8.66209	7.45065	5.68448	9.04417	9.18323	8.79655	8.2385	8.10737	8.84488	8.38978	8.04713	8.018	8.46877	9.08907	8.3909	8.9182	8.56442	8.82622	9.27643	9.10516	8.60124	8.09736	7.30899
ARFGEF1	7.44672	6.58848	5.59743	6.73137	6.95597	7.28861	6.24024	7.41349	6.75587	7.03855	7.26728	6.41228	6.70036	5.92008	6.44279	6.8423	6.60853	6.98604	6.5097	6.78268	6.05106	7.25125	7.24574	7.30579	6.78449	7.68435	6.19708	3.96198	4.10426	6.01763	5.63462	6.10389	5.25266	6.854	6.66296	6.21412	6.72638	6.12199	6.72439	6.86785	6.50769	7.27266	6.31609	6.76564	7.21187	8.09945	7.06064	5.8713	6.38231
ARFGEF2	9.19902	8.486	8.0279	8.47132	7.9547	8.45832	8.88393	8.46707	8.23737	8.57956	9.02365	8.66749	8.68671	9.30043	8.27064	8.21416	8.94452	8.30452	8.37997	8.81826	7.82483	8.7067	8.15826	8.6664	8.53089	9.33983	8.19065	7.24165	7.25906	7.80313	8.34765	7.84832	7.81643	8.00599	8.06135	7.97848	8.47789	7.75585	7.93449	8.34743	8.23387	7.6729	7.79144	8.47501	7.99111	7.99182	8.28483	7.72326	8.9549
ARFIP1	7.0693	6.24465	6.79351	6.23134	6.75536	6.35641	7.06556	5.83608	4.75143	5.89338	5.62306	6.24167	6.08175	6.16513	6.73728	5.47062	6.3478	6.91497	7.48629	6.34857	5.53107	6.41819	5.281	6.49198	6.37385	6.45942	5.72714	4.36673	3.92326	4.00781	4.6692	4.42612	4.92822	5.69584	4.87039	4.87558	4.68251	4.33816	5.53823	6.4826	6.04458	5.01652	5.91207	5.77619	6.3418	5.00455	5.74232	4.77218	5.29813
ARFIP2	6.47446	6.64979	6.33777	6.85938	6.95907	7.14134	7.97284	6.55481	6.37047	7.29241	7.34129	6.52962	6.60185	6.83509	6.23521	7.03735	6.63416	6.70556	7.15401	7.19018	6.5502	6.70697	7.17019	6.95703	7.01123	6.96081	6.86792	8.77532	7.19704	7.85126	7.69601	7.58524	7.5154	9.43492	8.28594	8.86496	8.32165	8.00114	7.97589	7.69988	8.10915	7.56263	7.89424	8.40595	8.44085	7.67142	8.49294	7.82546	7.85037
ARFRP1	5.60277	4.92542	4.96266	5.69537	5.63306	5.82368	5.19534	5.93284	5.18877	5.66747	5.41814	5.74465	5.50373	5.63294	5.37909	5.54165	5.37438	5.45198	5.65281	5.72228	5.06959	5.60199	5.21588	5.63382	5.92784	6.73131	4.99815	4.63371	4.92215	5.25503	5.65734	5.7849	4.98374	5.63126	5.76906	5.49545	5.84293	5.30405	5.98723	6.14911	6.31653	5.59559	5.82009	6.09567	6.20796	6.08194	6.23359	5.13715	5.69115
ARG1	3.24253	3.27579	3.15738	3.32113	3.22541	3.38098	3.54708	3.48691	3.22983	3.29016	3.475	3.29297	3.33665	3.33286	4.60237	3.40538	3.41906	3.5254	3.47326	3.58722	3.30238	3.27358	3.23088	3.4794	3.36392	3.23006	3.89936	3.23168	3.08696	2.82637	3.00755	3.34726	3.66167	3.08361	3.46806	3.03603	3.87737	3.32004	3.07943	2.6434	3.05204	3.10671	3.52357	2.87507	3.20844	3.12282	3.02118	2.8612	3.60585
ARG2	6.10565	7.63023	6.61162	5.82484	5.48765	5.42038	8.06657	5.89492	4.42449	7.78009	9.54668	5.49593	6.98812	5.88813	6.56633	4.76326	6.14467	6.37684	7.05428	8.3992	6.64121	5.67364	6.39922	4.34967	6.19123	6.46057	5.34391	4.99149	7.36508	7.94472	5.27419	4.93432	4.11637	5.57634	6.38667	5.85429	6.70727	5.8937	5.3035	6.0807	6.01129	5.62887	6.34162	5.20654	6.28811	5.36416	7.29851	5.09086	6.03703
ARGLU1	5.87969	7.56257	8.91569	8.25057	7.9375	7.48225	7.97422	8.91925	8.29134	7.92228	6.36281	7.6216	7.55059	8.704	7.68924	6.70816	7.88203	7.85429	8.07606	7.72043	8.61958	7.28341	6.586	8.22169	6.50456	6.8031	8.53572	6.2111	6.99196	4.47696	5.90512	5.47262	6.07907	5.54474	5.81971	5.13445	4.62803	5.95318	4.74484	6.55261	5.48071	6.08939	5.46574	5.92604	5.9488	5.3972	6.18632	5.12056	5.92628
ARHGAP1	5.98846	5.72926	6.51383	5.72137	5.50861	5.86132	6.46502	5.89352	6.15074	6.1308	5.05771	5.59195	5.54262	5.47742	5.48404	6.07904	5.87759	6.06619	6.04051	5.81968	6.23108	5.36195	6.03854	6.1784	5.77474	5.86183	6.65412	7.65527	6.84524	6.21402	6.72408	6.38116	6.73138	6.68344	6.8585	6.50339	6.22253	6.82258	6.4645	6.77554	7.20566	6.98016	6.22124	6.4958	6.33501	6.73089	6.46625	6.40259	6.1327
ARHGAP10	7.07884	6.40338	7.05197	6.53392	6.85021	6.58023	7.30977	5.79297	6.40625	6.24899	6.95943	6.48208	5.43392	5.97307	6.75407	6.11327	6.80567	6.73952	7.40438	7.58376	7.20336	5.90991	6.53035	6.66491	6.61326	7.40135	6.93451	7.63943	6.91443	6.28044	6.86756	6.53157	6.29763	6.25036	6.693	6.62033	6.52366	6.54235	7.08661	6.65458	6.25836	5.4934	6.90108	5.92081	6.12267	5.50015	7.44415	6.42021	6.36495
ARHGAP11A	2.85608	5.01176	2.95122	3.71653	5.19073	5.21245	3.40449	5.30807	3.64507	3.74958	4.14456	3.40288	5.27843	5.3936	3.39147	3.59101	4.74468	3.79964	3.0425	3.19966	3.19274	5.95466	5.41773	5.59069	3.96509	3.99781	3.52173	3.88857	3.30123	3.90527	2.98279	2.8083	4.54198	2.79363	3.75254	3.6163	3.59984	4.26578	3.15113	2.84613	2.96996	5.36725	3.12808	5.09043	4.18857	4.35962	4.40381	4.12865	2.94837
ARHGAP12	10.0779	8.30792	9.25757	9.12464	9.70643	8.80018	7.16465	9.03919	8.79854	8.12671	8.76481	8.99391	8.94513	8.47863	9.5365	7.50027	8.7988	8.77065	9.48066	9.16491	9.62096	8.66598	8.5309	9.02952	8.88566	8.11247	7.85618	7.93133	9.6281	8.01538	7.42884	9.73395	8.16391	7.97141	8.28561	6.93912	8.06257	6.97948	8.3	9.25721	8.65532	9.25291	7.87703	7.34277	8.90809	9.18711	7.13287	7.82531	9.01834
ARHGAP15	6.35968	5.41037	5.14785	6.61987	6.17634	5.74327	6.14802	4.88316	5.35285	5.99228	6.62986	7.08032	5.8302	6.44933	6.92775	4.33399	5.62185	5.99875	7.44586	7.79246	6.35016	3.94887	5.71829	5.34162	6.43071	6.2423	6.66581	6.55765	5.32299	4.35001	6.75282	6.0683	4.68962	5.38497	5.24899	5.55755	5.75481	5.54312	6.03256	6.99379	6.5168	4.40226	6.62621	4.17211	6.31712	4.06323	4.77699	4.40301	4.53383
ARHGAP17	8.13916	8.34155	8.53982	8.37889	8.27479	8.63364	8.48858	8.48596	8.65854	8.5668	8.39585	8.40859	8.59918	8.43924	8.32199	8.74243	8.18013	8.19783	8.16206	8.26723	8.34997	8.55819	8.8936	8.39576	8.13769	8.43426	8.88594	8.26634	8.51134	7.95286	8.14476	8.44835	8.52677	8.30941	8.36857	8.60973	7.73117	8.23907	8.3557	8.29628	8.01515	8.11145	7.99274	8.17739	8.55498	7.91378	8.36195	7.50253	7.61206
ARHGAP18	7.87579	6.14657	8.96008	8.59288	8.01713	6.78546	9.4393	7.57209	7.85076	7.23236	6.27236	7.54629	7.49374	8.2292	8.30902	7.80803	7.84737	8.35013	8.24508	9.38222	8.42964	8.39329	7.22012	8.52048	8.43158	8.56226	9.32528	7.19154	8.00235	5.87783	8.06524	7.15186	6.89958	4.50334	6.28457	6.87061	4.76585	6.45398	6.73345	8.40333	5.97338	7.77232	9.18905	5.25181	6.30187	6.74112	8.26906	6.18095	5.87042
ARHGAP19	6.32645	6.02105	4.44745	6.76148	6.90721	7.01086	4.67688	7.84179	6.3188	6.6939	7.69842	6.10398	7.82747	6.71996	6.92509	6.68521	7.9883	7.32724	6.65544	6.47277	6.39193	7.57376	6.9483	8.42433	7.22605	6.76032	6.35951	5.18573	4.7158	5.77295	5.12217	5.73491	6.88791	5.83753	5.87688	6.76531	5.24446	6.70901	6.30834	7.16342	5.90723	7.67121	5.52076	6.36512	7.22637	6.83425	6.74286	7.09423	5.38807
ARHGAP20	7.99044	5.13547	5.59164	6.55785	5.12956	9.1623	4.57566	3.408	4.22632	7.38577	6.61206	6.97325	5.00757	6.61027	6.34198	4.76013	5.45788	4.84936	7.63477	8.03508	7.48629	3.57442	4.2839	5.33015	5.11891	7.85118	4.85699	4.99889	4.51885	6.41105	4.57767	4.95104	3.77524	6.65265	6.98017	5.61967	6.54256	4.07001	5.71512	3.3555	5.86801	4.35348	5.62188	4.01767	5.68676	3.91849	3.4231	3.96763	7.60696
ARHGAP21	5.76183	6.22453	7.57631	5.96296	6.05207	8.29942	6.17438	7.03464	7.65355	7.00409	6.54352	6.29941	5.94818	5.78407	7.03691	7.31408	7.08131	6.65093	7.49185	6.90911	7.27413	6.64749	6.20143	7.02378	6.33899	5.48814	7.43954	9.61696	8.14306	6.16947	6.92992	8.79737	9.31018	6.87897	7.95965	6.3342	7.2149	7.73669	7.66287	8.41968	8.65667	9.81784	7.77359	7.48872	7.30146	9.47578	7.86959	8.47044	8.51776
ARHGAP22	5.76867	6.33975	6.64245	6.16294	6.23344	5.23258	6.261	4.93207	4.47851	6.26536	6.5889	6.89551	6.06271	5.89591	6.21325	4.86802	7.22498	4.62245	8.04245	7.82513	8.35221	4.51441	6.72521	4.79652	6.34259	8.16566	7.98489	6.79125	6.26899	5.80303	6.6825	6.51169	4.08319	7.22435	6.73546	6.50995	6.52876	7.17601	6.978	6.16482	7.94046	4.81515	6.90709	4.56509	6.25691	4.04813	4.73329	6.38612	5.08941
ARHGAP22-IT1	4.20186	4.30179	4.05897	4.18755	3.92472	3.83415	4.31174	4.11129	4.23385	4.29883	4.19399	4.17856	4.16697	4.18606	4.06316	4.95801	4.09073	4.34782	4.21329	4.2163	4.32515	4.14267	4.10919	4.09525	4.24133	4.23803	4.28504	4.01852	3.68706	4.16585	4.06477	3.89975	4.38803	3.95406	4.09625	4.22101	4.00424	4.13507	3.64366	3.71912	3.89578	4.10877	4.0617	4.30321	3.99291	4.08695	4.05912	4.10064	4.08508
ARHGAP23	7.85995	7.36081	8.17048	6.90665	7.57606	7.63235	8.16723	7.78882	8.00511	7.8981	7.0953	7.32402	7.34918	7.33849	7.32086	6.38787	7.18341	6.237	7.51448	7.97604	8.13718	6.11373	7.64224	7.45255	6.44885	8.43931	8.7922	7.11395	8.91318	8.67747	8.17852	7.66072	8.02594	7.76197	7.76615	7.80627	8.48694	8.88139	8.02631	7.34483	9.47345	6.77932	8.04483	6.37986	7.76282	7.5353	7.44203	7.7732	8.55256
ARHGAP24	7.24236	5.4409	7.08663	7.69326	6.46206	6.16522	8.05119	7.90306	6.60469	6.70418	8.16622	8.28125	7.04643	6.19901	7.95913	6.73855	8.58681	6.09159	8.14712	8.37049	7.02817	5.03244	6.98379	6.18004	7.05987	8.71982	8.04411	5.3134	6.22691	5.75409	7.03798	6.92178	7.62134	6.03963	6.15415	5.92939	7.24085	6.60888	6.66661	7.06462	6.75176	5.6527	7.30956	5.38773	6.47477	5.31469	8.10676	5.50855	7.54146
ARHGAP25	7.0672	6.31341	6.96298	7.12247	6.35764	6.51519	6.76812	5.12098	5.82311	6.71437	5.45062	7.37146	6.33845	6.60521	7.20211	6.09011	6.55434	5.99826	6.912	7.36965	6.61085	4.95784	6.51559	7.44125	6.65374	6.02587	7.30583	6.51094	6.71039	6.07655	8.0291	6.01321	5.58275	5.63123	6.51376	6.68687	6.02144	6.1308	6.75695	6.20972	6.33475	5.14154	6.80417	4.37659	6.25189	5.03057	6.20376	5.76314	5.67111
ARHGAP26	6.54625	5.93028	6.79899	6.83977	6.37859	6.95573	6.8543	3.9762	6.08101	6.41571	6.3214	7.46632	6.9203	4.84834	6.91639	4.00431	6.21162	7.17661	7.00892	7.03719	6.40305	4.14954	5.74379	7.46935	7.00897	5.57512	7.13804	4.05806	5.18468	5.92051	8.3046	5.17883	5.04582	6.66438	7.25349	6.11434	7.94027	5.59011	6.29046	8.13387	7.17928	3.85019	6.6869	4.62161	5.1025	4.68979	5.64548	5.72276	8.36597
ARHGAP27	6.43318	6.00443	6.46779	6.66183	6.01473	6.50545	8.08451	6.09587	6.20126	6.49967	6.74276	6.77639	6.23199	5.99903	6.80154	5.36387	6.17754	6.07209	6.93707	6.69547	6.79041	5.86709	6.23456	6.02493	6.68301	6.46098	6.70989	6.25854	6.35744	5.77317	6.4878	6.21994	6.16708	6.15254	6.27052	6.23352	6.39009	6.01122	6.5218	6.68047	6.62884	5.84581	6.67013	5.75223	6.1295	5.18841	6.34865	5.80948	5.92635
ARHGAP28	4.34396	5.07482	3.91999	5.01389	3.83958	3.45869	2.97278	4.7982	3.16682	3.38903	3.0843	4.06801	3.21673	2.9943	3.90734	3.55289	3.10935	3.65205	4.18664	4.98116	2.98923	6.02044	3.47538	5.43911	5.65926	3.09586	4.39531	2.92355	3.1259	4.19729	4.85637	3.70053	3.34142	3.94377	3.22718	3.97539	4.10224	3.67149	3.50009	3.92895	3.05413	3.45156	3.61628	4.5722	3.19041	3.24417	3.16655	3.33647	3.31571
ARHGAP29	3.02061	3.31431	3.63725	3.4751	3.50551	3.04634	6.0673	3.39902	3.93128	3.35675	3.24334	3.62416	3.48496	3.82477	3.73851	3.66686	4.54798	3.3439	3.44146	4.30122	3.81204	2.87625	4.11414	3.3119	4.38863	3.48997	4.65607	3.98632	4.36053	3.23479	7.54914	3.25812	4.30455	3.47227	4.48949	5.18807	4.42046	3.55832	4.39904	5.47719	3.96582	3.96198	7.13883	3.51112	4.00297	6.1901	6.50858	5.31986	4.15764
ARHGAP30	6.51914	4.36647	4.06672	6.49694	5.26541	5.76814	6.9298	4.20719	4.53431	5.91077	4.28402	6.66379	5.06271	5.38814	6.00392	4.61487	4.96807	5.46843	5.31224	6.75073	5.67282	3.93774	5.10232	5.0695	6.23681	6.62212	6.65387	4.77694	3.88726	4.06433	6.8603	5.72348	4.12265	4.77197	5.17271	5.10396	5.33057	5.38452	6.02572	6.06163	5.77674	4.10163	6.61133	3.79105	4.26464	4.29473	5.21416	4.32159	4.0452
ARHGAP31	6.83362	6.5319	8.04962	6.68758	7.09767	6.67383	5.9364	6.02471	6.50841	7.23714	6.19804	7.01121	6.85918	6.01847	7.18324	6.7097	6.60356	5.98843	8.05427	7.42884	7.29219	5.39288	7.61591	7.37331	6.2555	6.18256	6.43017	7.04938	7.53618	7.98854	7.36899	6.42132	6.03534	6.99051	7.59922	7.79844	6.90055	7.66828	8.11028	7.05831	7.30258	5.36096	6.95907	5.23849	6.78335	6.13838	6.44733	7.55212	6.23891
ARHGAP32	5.63951	7.40938	7.49356	6.64003	7.86354	6.47687	5.227	8.10049	7.10628	6.86551	6.11425	7.20943	6.55685	6.07394	7.81615	5.62988	6.47785	6.94336	7.90667	7.73248	6.80191	7.43749	6.16131	6.26352	8.17264	7.06682	5.76918	4.34353	5.14646	6.0434	5.32222	4.69912	5.75061	5.53063	5.8392	5.51167	7.68466	4.73837	5.25241	6.98714	5.88502	5.77667	5.74714	6.3429	5.86388	6.49819	5.1362	5.19878	8.05069
ARHGAP33	6.03194	6.98285	6.41031	5.86796	6.37393	6.34362	5.85769	6.5203	6.5776	6.13472	6.26695	6.30032	6.54239	5.93324	5.94385	6.75245	6.32865	5.45148	6.11194	5.63706	6.68708	6.44063	6.25439	5.40148	5.77989	5.54128	6.31774	6.84168	7.89846	7.62327	6.56078	7.50249	7.58559	7.04154	6.66084	7.2331	7.64261	7.86748	7.19051	6.3013	7.29301	7.85938	6.79769	7.82297	7.0945	6.5901	6.20996	8.14128	7.45277
ARHGAP35	5.24124	5.43517	5.48942	5.03025	5.5393	5.80981	4.26438	5.46719	5.07345	5.21298	5.24908	4.63937	5.40548	4.91593	5.29417	3.9793	5.18824	5.4637	5.07559	5.28239	4.94205	5.23437	4.31089	5.04618	5.36848	4.60636	4.96578	6.19317	6.4775	7.7846	5.83266	5.91231	5.71686	6.46937	5.44957	6.93556	6.45446	6.75585	6.63683	5.33378	5.52692	6.30174	6.10415	6.15431	5.87835	4.96136	4.86178	6.12655	6.12422
ARHGAP36	5.04063	3.53071	7.27083	8.82217	3.99302	4.72668	5.37458	3.76103	5.68799	6.64752	5.33998	4.26611	10.5154	3.33748	7.37124	3.16305	4.47321	4.40993	5.99682	3.35942	8.78761	6.62806	3.19922	3.45738	3.01038	3.28093	4.22417	3.10837	10.076	8.76942	4.03017	3.17832	5.41435	7.30015	8.57012	3.59652	4.24558	3.35421	4.2443	9.12088	4.29158	3.68425	3.48656	5.63579	2.9747	6.29445	2.91592	3.29179	6.81588
ARHGAP39	4.49147	4.26126	4.0444	4.33136	3.97588	4.46658	3.97141	3.90589	4.82625	4.72567	4.12718	3.85328	3.96141	4.24937	4.18561	3.87941	4.07355	4.20342	3.97093	4.36979	4.31613	3.92668	4.90965	4.07779	4.66566	3.8081	4.66307	4.17149	4.60603	4.7582	4.0536	5.45845	4.21321	4.76181	4.05588	4.38201	5.00082	4.91943	5.30544	3.74608	4.60247	3.77751	4.85962	4.07768	4.03753	4.34866	4.16606	4.46532	4.93645
ARHGAP4	5.84556	5.48792	6.18551	5.88878	5.69597	6.00175	7.23261	5.42655	6.22592	5.89594	5.44943	6.28995	5.68853	5.82736	5.90998	6.16533	6.47335	6.10376	6.19535	6.42941	6.32503	5.51456	5.91324	5.64034	8.56542	6.46003	6.88047	7.16974	5.95251	5.25319	6.74656	6.16205	6.57339	6.14488	5.87816	6.35622	6.34733	5.66424	5.70048	5.96147	6.14804	5.7589	6.0275	6.10458	5.57067	5.28012	5.68191	6.00363	5.95651
ARHGAP42	6.50802	5.13096	5.93348	6.39445	6.76906	8.02852	4.69438	7.4352	6.48564	6.04535	5.93201	6.01045	7.26627	5.27046	6.75781	5.30298	5.99499	4.97498	6.90758	6.7468	5.62215	5.93186	6.15028	4.64414	6.95816	4.72828	5.94099	4.7949	6.3799	7.04924	4.58915	5.16799	4.84474	5.0159	6.04173	5.9645	5.21512	5.0728	5.42776	5.02408	5.40362	6.01885	6.15058	8.28983	5.85971	6.71799	3.89854	6.30521	4.96065
ARHGAP44	4.41238	6.5541	4.05102	4.80762	5.3361	3.88506	3.97617	3.8423	4.46395	4.72722	4.07602	4.45991	4.21012	3.97572	4.20543	4.37829	5.47512	5.42221	5.57422	4.64166	5.42548	6.27493	4.33339	4.4523	5.14539	6.71563	5.356	4.91982	5.76388	5.2284	4.25193	4.17309	4.24132	5.95503	4.16511	6.16375	8.39877	5.13383	5.53986	4.96242	6.18255	3.73487	6.0928	4.33046	4.37254	3.71694	4.24575	5.89311	8.55562
ARHGAP5	9.21115	6.40415	7.91866	7.04684	7.0235	7.02853	5.48444	8.72936	8.97915	7.48992	7.34	6.71498	7.87291	7.8795	8.65064	5.26742	7.46025	7.96479	8.1546	7.93745	7.47531	7.76971	7.35187	7.28231	7.54725	6.27057	6.70818	6.72783	7.83838	7.42943	7.00781	5.94183	7.06819	7.428	6.51006	5.5246	7.4026	6.87369	8.6474	6.73975	8.25133	7.43409	6.62495	4.84776	6.54452	8.31489	5.47527	6.62267	8.54789
ARHGAP5-AS1	7.23377	5.50053	5.50082	5.75927	6.49112	5.65465	6.22962	7.00273	5.90999	6.49367	6.66039	6.44461	6.46647	6.66117	6.92412	6.26698	6.02578	6.89293	6.69593	6.27137	5.37202	5.87278	7.29984	6.27779	6.02353	6.37045	5.52781	6.27826	5.60005	6.46927	6.28655	5.75515	5.76465	7.32173	5.48983	5.51374	6.67401	5.75589	8.23445	5.41234	6.58616	5.22071	5.65746	5.16028	5.7128	5.8051	5.97867	5.39123	6.05598
ARHGAP6	9.11855	5.69105	7.61908	7.27965	6.14003	6.16457	6.23451	6.72233	6.86989	6.89919	6.22106	6.92713	5.31918	7.10533	7.40067	4.53493	6.31592	6.778	8.87158	8.60586	8.78894	4.25295	6.02943	6.07212	7.59649	8.87735	7.12621	4.27882	6.99841	6.78608	5.31879	4.78016	5.98388	4.89873	6.31776	5.06587	5.7703	5.64781	6.46694	5.79844	7.58708	7.62144	6.43712	5.02963	4.76459	6.37545	5.74184	5.09313	4.69831
ARHGAP8	3.8886	3.97408	4.41756	4.13671	3.72376	3.8459	4.37211	4.09839	4.03166	3.79446	3.67797	3.78594	3.84348	3.87219	3.69226	4.35419	3.92824	4.13936	3.9802	3.97504	4.02511	3.97766	3.99037	3.99127	4.11829	3.9802	4.00409	4.43434	4.95862	3.86488	4.60853	4.73308	4.68329	4.06072	4.13667	3.95811	4.9212	4.85846	4.82334	4.64443	4.40742	4.56397	4.17543	4.39824	4.02116	4.14228	4.2738	4.53563	4.33543
ARHGAP9	7.05888	5.1549	6.6113	7.28095	6.3635	6.62443	8.58195	5.27231	5.69948	6.92182	5.28275	7.59621	5.73485	6.68818	7.08895	5.75392	6.31601	6.54569	7.56383	7.49436	7.09429	5.0484	6.18335	5.78884	6.68714	7.17983	7.69799	7.09616	5.49239	5.08792	7.60546	6.75632	5.78278	6.55548	6.0931	6.49338	6.38791	6.34591	6.79981	6.83059	7.04635	5.08862	7.57348	5.42109	5.48866	5.05403	6.02839	5.63005	5.53976
ARHGDIA	3.73795	4.7403	3.98748	4.19238	4.48535	3.08329	4.16299	3.85595	3.10939	4.23626	4.54111	3.68455	3.78093	3.61256	3.80509	3.32614	5.34075	3.76537	4.89269	3.91914	3.30987	3.92345	3.44695	4.19331	4.80962	4.00409	3.4708	3.23577	3.43672	3.67705	4.78926	4.43705	4.16022	6.22027	5.59989	6.35088	5.10214	4.63666	5.6921	4.79001	5.63259	4.5074	5.07239	5.94638	6.23872	4.51047	7.29152	4.78802	3.44142
ARHGDIB	7.09589	5.09233	5.43018	7.21932	7.11399	5.90468	6.55482	5.34563	5.7926	6.41886	5.45835	7.4063	6.59001	6.5834	7.00479	5.26556	5.82453	6.59175	6.69254	7.44938	6.33378	4.71984	6.62286	5.87081	6.55259	6.64663	7.28164	5.65422	6.70621	6.24662	8.43575	7.51751	6.41901	7.47039	7.78254	7.89077	7.32406	7.29536	8.18181	9.07527	8.40224	6.1215	9.60885	6.21976	7.8551	6.49693	7.32074	6.86979	6.21591
ARHGDIG	5.25287	5.64483	5.78812	5.51532	5.64375	5.29449	5.75582	5.36607	4.99607	5.47459	5.40284	5.51692	5.56821	5.41258	5.57086	5.43319	5.56879	5.51068	5.28864	5.17892	5.29796	5.38262	5.49766	5.55485	5.43183	5.49005	5.61918	5.39978	6.53249	5.10973	5.79983	6.35812	5.32474	6.35305	5.17652	5.85223	7.96513	6.66629	6.0728	5.54934	6.19157	4.89185	5.82175	5.2233	5.86436	4.98023	5.98441	6.61925	8.09551
ARHGEF1	5.4154	5.41496	6.11942	5.29311	5.42307	5.7189	6.41002	5.28161	5.94003	5.596	5.6219	5.64406	5.6267	5.54742	5.38129	5.76183	5.74179	5.37733	5.9111	5.84946	6.05127	5.55446	5.66413	5.34878	5.45312	5.44595	6.16885	7.33424	7.49678	6.71162	7.04045	6.9404	6.81759	7.35749	6.21003	7.01488	6.37319	7.18238	6.86389	6.42447	6.99394	6.77147	6.93119	7.00547	6.6843	6.41947	7.41085	6.83309	6.46179
ARHGEF10	4.95062	5.35369	7.15793	5.33144	4.64922	6.0604	5.25667	5.97063	7.26647	5.33144	5.52419	4.96371	4.50142	4.54979	5.89781	7.35313	5.76292	5.34114	5.58576	5.18963	5.87647	5.14885	6.02159	5.18011	4.67599	6.07607	7.30368	7.51649	7.70383	7.50388	7.74973	7.26026	7.04039	6.35057	6.58618	6.6575	7.03979	7.86691	7.35816	5.94711	7.61625	7.42128	6.41592	7.26908	6.5636	7.88293	5.52387	5.87427	7.3221
ARHGEF10L	4.91212	5.4063	5.98572	5.16119	4.69963	5.55022	6.87142	4.87619	6.87018	4.6835	4.90816	5.69797	4.73263	5.36591	5.05237	5.59148	5.46815	4.96015	5.17151	5.08894	6.30153	4.65028	5.25409	4.5964	4.59176	4.32316	5.91913	5.55956	5.68517	6.01458	6.85238	6.64576	7.3155	5.3044	6.14169	4.95824	5.25743	5.49517	6.05767	6.40321	5.99049	5.99546	5.40435	5.64046	5.07862	5.95498	4.81344	5.65707	5.75863
ARHGEF11	3.918	4.20046	4.40123	3.98335	3.97627	3.88506	4.07886	4.15801	4.09282	4.04675	4.41453	4.16966	3.93521	4.27551	4.13013	4.66843	4.3895	3.92111	4.07203	4.11827	4.3436	3.95826	4.2264	4.20891	3.78611	3.91323	4.27551	5.35337	4.24585	5.66641	4.89735	5.07198	5.10014	6.16706	6.15745	6.33728	5.83751	5.23445	4.90964	5.41688	4.98037	5.54111	4.7111	5.65616	5.11279	4.2953	4.79498	5.13077	4.88255
ARHGEF12	6.23115	4.62399	4.93463	5.27215	6.08885	5.11957	4.17298	5.74688	5.44295	5.46777	4.88914	5.76002	5.90174	5.71762	6.05762	3.76088	5.74984	5.39281	5.32049	5.92986	5.62864	5.69214	5.34736	5.71813	5.45506	5.70046	4.97393	4.0786	5.41246	5.61795	5.20286	5.1613	5.27911	5.25516	5.55654	5.63162	6.18789	4.40742	5.55473	5.3725	5.41088	5.11725	5.09092	5.54081	4.77534	5.50456	4.53111	4.44601	6.30337
ARHGEF15	3.98281	4.05755	4.5112	4.25985	4.42548	3.92344	4.53315	4.01958	4.71561	4.01396	3.91073	4.20826	4.21437	4.28731	4.26759	4.76466	4.12708	4.06231	4.03214	4.58002	4.60261	4.31659	4.30448	4.3224	4.34431	3.9815	5.07358	4.51311	5.28853	4.08665	4.42388	4.09384	4.37814	4.06442	4.20758	4.52156	4.39648	4.44315	4.28223	4.24166	3.95572	4.30457	4.67849	3.88271	4.52886	4.07183	4.30288	4.2845	4.37542
ARHGEF16	5.5162	5.86232	6.32316	5.80332	5.87041	5.74851	6.14723	5.83065	5.9866	6.16351	5.62957	5.6853	5.9396	5.61995	5.90617	6.1962	6.01594	5.83225	5.4607	5.97654	5.92935	5.52105	5.97364	6.01843	5.6842	5.90541	6.37411	6.16529	6.42922	5.52792	6.0093	6.19537	6.14597	6.45962	5.89952	6.12432	5.85084	6.22331	5.63961	5.74602	5.77403	5.7748	6.12831	5.92355	6.0384	5.8274	6.1219	6.07749	6.10016
ARHGEF17	6.45475	6.8303	7.44571	6.98528	7.11541	7.10853	6.70163	6.58189	7.44233	7.13027	7.13204	7.47491	6.51613	6.44129	6.44347	7.50213	7.03909	6.99828	7.25275	7.41779	8.05739	6.60969	7.14229	6.4308	7.24468	6.78178	7.58141	6.89601	7.77265	7.12303	7.56177	7.8885	7.6119	7.412	7.70542	7.80164	7.39994	7.22697	7.62158	7.00895	7.71311	6.88535	7.94102	7.26537	7.59362	6.86097	6.46556	7.33001	7.56606
ARHGEF18	8.40055	7.85948	7.4101	8.41775	8.06414	8.53386	7.97306	8.45327	8.6057	8.41894	7.94133	8.34091	8.69052	8.33058	7.84126	8.08844	8.09068	7.88245	8.15827	8.10572	8.17126	8.2382	8.46774	7.89926	8.63802	8.0133	7.90318	8.3047	7.88102	8.15137	8.86699	8.82805	8.56297	8.54044	8.29576	8.07684	8.09856	8.42185	8.31172	7.9719	8.2301	8.6626	8.32237	8.85328	7.86829	8.57404	8.55471	8.29765	8.04693
ARHGEF19	4.66198	5.0038	4.9704	5.17819	5.08305	4.76558	5.36594	6.57518	4.57242	4.39034	4.99337	4.75442	4.75036	5.74053	4.29389	4.85891	5.0093	4.53463	4.44428	4.92451	4.73875	5.02965	5.78128	4.72015	4.80095	4.86916	4.89354	5.37348	4.65674	4.61197	5.27136	5.51501	5.81401	5.27905	4.71233	5.33231	5.19812	5.31724	4.93333	5.31889	4.7234	5.34801	4.87776	5.97985	5.16138	4.77297	5.5272	4.63267	4.95922
ARHGEF2	7.52274	9.83209	9.48966	8.25586	8.64501	9.80768	8.29009	8.54061	8.75293	8.55894	9.43517	8.38778	8.95712	8.79672	8.38321	9.18569	8.78445	7.45936	8.37527	8.85069	8.3819	7.1162	9.53906	8.78898	7.43682	8.96328	9.71886	10.0771	10.2051	9.07387	9.43602	8.67824	10.289	9.67196	10.2561	9.07975	9.24413	10.1203	8.87742	9.38642	9.59581	9.81438	9.23013	8.15965	8.53969	8.79776	8.89102	9.36827	9.1528
ARHGEF25	5.5983	6.7004	6.87172	6.1173	6.52644	6.53854	5.9783	6.24172	6.05216	6.3502	5.58391	5.99859	5.49031	5.41771	5.86407	6.39956	5.99587	5.79806	6.87737	6.66123	6.70607	5.93038	6.35881	5.7959	6.3135	6.19924	6.44066	7.44346	7.01951	6.43458	6.16909	6.4034	6.81377	6.93094	6.79364	6.96958	7.71163	6.55617	6.78028	6.51367	6.60976	6.69879	6.44312	5.72659	6.44251	6.39372	6.05571	6.66371	7.29724
ARHGEF26	9.29062	6.22986	8.00694	8.83663	8.58392	9.21735	5.39457	9.40784	9.81486	8.2433	8.56616	9.75431	9.5119	8.96632	9.26186	9.45361	8.12247	7.98993	9.62499	9.37991	10.0126	7.86961	7.46509	8.92831	9.8883	4.98975	7.60483	7.75787	7.17435	9.21871	8.69606	7.2791	8.20146	7.95324	8.76346	7.6372	7.76212	7.70808	8.41104	9.29065	8.59156	9.13359	7.75368	6.84746	6.35865	10.3956	4.57228	8.47059	8.97786
ARHGEF26-AS1	8.92286	4.27884	7.63617	6.85689	7.52361	6.12534	3.49744	6.33981	7.78581	5.98646	5.60651	8.20087	6.47695	7.10671	7.14358	4.83409	5.53428	6.48948	9.71798	8.20495	8.39424	5.02405	5.58528	6.68792	8.38718	3.70389	5.75116	4.79344	5.29404	5.54814	5.41714	4.29195	4.72122	4.79376	5.28807	3.83464	6.03082	4.609	6.54663	4.68283	6.70065	4.45284	4.01054	3.77804	4.30481	6.65442	2.91245	4.64873	7.14299
ARHGEF3	9.36555	8.32606	8.73012	9.3307	7.7801	7.77027	8.31621	8.54832	9.48454	9.5905	9.84085	9.0068	9.10716	8.27837	9.10962	8.01898	8.37451	8.55332	8.91761	8.66363	8.22954	6.83616	9.44025	7.92743	9.22038	10.8259	7.86902	8.1021	8.30676	8.50381	7.31553	9.16757	7.34146	8.53524	8.5049	8.27642	9.03242	7.90536	9.52263	7.24754	8.06083	8.71139	8.45258	7.09495	7.81715	8.76358	7.90062	8.09046	8.69016
ARHGEF37	6.95675	4.63265	5.25599	6.03207	5.33858	4.37484	7.152	4.98936	6.04181	7.08372	5.74977	5.91589	6.11841	5.48655	6.6568	5.02306	6.03404	5.61309	6.7553	6.89439	4.59736	5.48462	5.62274	4.9595	5.63996	5.92381	8.09853	7.13544	5.31097	4.41189	6.96966	6.77956	4.75839	5.10097	5.3557	5.96366	6.07869	7.57961	6.36528	5.92179	8.09172	5.44554	5.69501	4.88689	4.75626	4.84535	5.15474	5.82672	5.72875
ARHGEF38	3.54616	3.82658	3.72092	3.59513	3.80016	3.54189	3.63687	3.73803	3.74049	3.84739	3.64524	3.91726	3.51979	3.64455	3.53552	4.10527	3.79447	3.57638	3.46593	3.61512	3.63608	3.98375	3.88126	3.65536	3.67217	3.65727	3.67123	4.01588	3.70131	3.48309	3.69264	3.74818	3.35731	3.57659	3.76956	3.91359	3.69896	3.48576	3.44641	3.40758	3.79028	3.44844	3.64131	3.46565	3.79129	3.43198	3.63877	3.51193	3.72642
ARHGEF4	6.28755	7.28662	7.59332	6.18255	6.67112	7.15452	7.14045	4.95705	5.85621	8.30598	7.84463	7.93625	6.9618	6.8404	6.77679	7.17771	6.80907	5.53858	7.62973	6.08297	7.69232	6.12688	6.46447	6.24039	6.23353	4.04197	6.67285	9.25629	8.72524	7.55803	9.20762	7.83663	4.93556	7.31393	8.26916	7.28124	8.81936	7.68817	8.38225	5.39618	8.30828	7.91042	7.43404	6.99202	6.59215	6.51749	3.20292	7.39719	9.02521
ARHGEF40	6.34481	6.01708	8.08265	5.8416	6.00377	6.93151	6.80109	5.62383	7.67641	5.98884	6.43981	6.00328	6.17196	5.67673	6.07324	7.7029	6.6488	6.3459	6.36853	5.5592	7.58663	5.86195	5.62889	5.63928	5.32431	5.8263	7.00587	6.56782	8.11255	6.74762	6.5476	6.61157	7.81871	6.18866	7.14332	6.48549	6.31818	7.39844	6.386	7.36346	5.56732	6.20593	6.44468	6.33628	5.74537	6.82579	5.12961	6.36337	6.17589
ARHGEF5	4.88518	4.79503	4.91479	5.42726	5.27951	4.51309	7.20061	4.80913	4.46825	4.84404	5.11777	5.21354	4.4253	4.72918	4.72983	4.72175	5.10207	5.4358	5.34182	5.31904	5.57139	4.64324	4.56116	4.71588	5.27841	4.90976	5.25141	4.71751	4.83589	5.21757	5.14226	4.80115	4.43918	4.08494	4.46151	4.54438	4.9064	4.68702	4.96566	4.9453	4.71087	4.6964	4.96215	5.08858	4.98731	5.06005	7.2429	4.88963	4.95501
ARHGEF6	9.81092	7.74745	9.30317	10.0077	9.32487	9.76741	8.20371	9.54087	11.0471	9.50822	10.1316	11.1809	10.6123	11.0303	10.217	9.52871	9.27257	9.13204	11.0478	10.453	10.6193	11.1579	9.35794	9.18047	8.28364	9.09663	9.5613	8.10626	8.26294	7.80397	8.74078	10.4185	9.21961	9.68278	10.1061	8.5179	8.22079	8.52426	10.0206	10.2007	9.49992	9.05557	10.3382	8.99423	6.41913	10.0522	9.58244	8.72205	9.40531
ARHGEF7	3.69553	3.75148	4.08596	4.37407	4.32441	5.18357	3.79768	7.16582	4.12477	4.2454	4.25067	4.66644	4.97939	5.44397	4.41967	3.88907	4.6413	4.14642	4.71654	3.92845	3.99994	4.49147	4.44034	5.09793	3.69817	3.81403	4.10646	4.10529	3.98806	5.6311	5.22092	4.49942	4.31713	7.66798	6.4366	4.75634	6.3931	3.56299	7.78952	8.35081	7.03509	5.98535	5.4858	8.50351	8.81725	7.99729	4.92064	4.9352	6.04674
ARHGEF9	7.84237	8.46973	7.24585	7.25637	8.02238	7.87753	6.29193	7.71659	7.72543	8.00138	7.18261	7.26459	8.77585	7.35658	7.52981	7.31698	7.16613	7.28217	8.06633	7.61023	8.07016	7.65259	7.93973	7.48742	6.93227	5.14589	6.31365	7.44518	7.49419	7.52062	6.52807	6.80945	7.56908	7.99329	7.51624	7.81031	9.24256	8.0783	7.74345	7.9162	8.16608	8.02274	7.39555	9.12528	8.13328	8.19341	4.87454	8.40735	9.35295
ARID1A	5.83081	5.54677	4.81791	4.41377	6.21273	6.0368	4.57207	6.03215	5.65384	4.84983	5.26429	5.36018	6.06271	5.72959	4.52285	5.20358	5.27686	5.09933	5.19897	5.35164	5.05626	7.03954	5.24112	5.436	5.26828	4.62025	4.76533	7.95155	7.73372	8.07901	8.12239	8.13311	8.65783	8.67386	8.64516	7.99893	7.82268	8.78879	8.44519	8.99127	9.02134	9.53388	8.11098	10.1203	8.44534	8.73038	8.1653	8.37102	8.34906
ARID1B	7.48642	7.34557	7.67198	6.34459	6.95948	7.01236	6.1778	8.13188	8.0075	6.95565	6.32564	5.87286	6.72722	6.31539	6.98474	5.13107	5.74137	5.28325	6.63496	6.63868	7.40403	7.99006	5.99972	6.66907	6.9912	6.02863	6.55256	6.6374	8.11044	7.23215	6.85448	8.34612	8.39453	7.21726	7.02524	7.49704	7.48812	6.78163	7.33118	7.85234	7.25073	8.09055	7.75425	7.94136	6.66234	7.16285	6.25325	8.15084	7.73574
ARID2	5.48996	5.48751	5.83618	5.16204	4.86976	5.54718	4.76846	6.01827	5.8592	5.10985	5.21947	4.81537	5.54982	5.21639	5.38166	4.21833	5.17542	5.72299	4.97969	4.78213	5.75598	5.55134	5.19398	5.96838	5.24583	5.16785	5.23185	5.40118	5.72617	6.83664	6.13594	5.4864	5.98682	5.77877	5.86008	5.407	5.90257	5.54454	5.77079	7.45328	6.45672	7.40279	6.26237	7.77261	6.82566	7.21269	5.12193	6.13183	6.51632
ARID3A	4.73748	4.88827	5.99607	4.83295	5.09624	4.7695	5.51257	4.34866	5.68799	4.78456	5.49589	5.26726	4.59203	4.25307	5.40856	4.77684	4.98845	4.73243	5.6537	5.63777	5.97977	4.53028	5.54674	4.52531	5.72442	5.93547	6.12391	4.92758	5.49537	4.95868	5.37597	4.78906	5.89891	4.41974	5.35266	5	4.7751	5.31629	5.14719	5.61405	4.54734	5.55622	6.12306	5.56785	4.69737	4.6734	4.88559	4.77903	4.36475
ARID3B	5.6707	5.82552	5.53713	5.60451	5.55056	6.33209	5.99712	6.5671	6.38735	5.20643	5.24813	6.19328	5.44058	5.98495	5.82826	6.20336	5.3631	5.75237	5.81302	5.72673	5.59028	6.26823	5.73197	5.74939	6.11945	5.37386	6.06969	6.70676	6.02731	5.41814	6.30773	6.51169	6.73586	5.76025	5.53778	5.90891	6.03794	5.8196	6.13047	6.5426	5.94284	8.04139	5.72521	6.97648	5.46813	6.30039	6.5614	5.66615	6.53754
ARID4A	7.19858	6.26039	6.82714	6.36025	6.51454	6.78811	5.73045	7.68851	7.07421	7.23817	6.78118	6.73057	8.0698	6.97528	7.28645	5.3651	7.0368	7.41233	7.9115	7.38935	7.39232	7.51743	6.60011	7.33996	6.84244	6.60388	6.21784	4.30542	5.86814	7.09257	6.22857	5.99625	6.27437	6.24447	5.55225	5.22674	6.50469	6.44282	6.37593	6.93011	7.08275	6.90925	6.83677	6.14788	7.01011	6.33121	4.69207	6.4034	7.23201
ARID4B	8.04082	8.74952	8.99688	7.86363	8.39271	7.49305	8.01196	9.30283	8.08688	7.84059	7.86755	8.06024	8.26846	8.03799	8.65438	8.17399	7.88151	8.46958	8.27411	8.4096	7.85989	8.00407	7.96218	8.38467	8.24725	7.75187	8.08644	7.9109	8.10935	7.55256	7.37929	6.84364	7.53897	6.9114	7.2093	6.82825	6.40677	6.64989	6.886	7.76135	7.11458	7.97407	7.4803	7.64184	7.13524	7.09666	7.01574	7.65746	7.40048
ARID5A	6.1219	6.26784	6.99472	6.62329	6.59586	6.11678	6.44925	5.90928	6.07779	6.12207	6.82715	6.89536	6.39068	6.83451	6.45385	6.40563	6.98379	6.11301	6.91547	6.76899	7.35168	6.05242	6.86421	6.11272	6.24923	6.75232	6.56447	7.63097	8.16183	6.94631	7.24239	7.07462	7.4768	6.4732	7.19851	6.16818	6.85376	6.46091	7.03604	6.62757	6.78005	6.15226	7.8652	6.40535	6.84045	6.78362	7.14027	6.40824	6.60249
ARID5B	8.95349	8.60983	8.5159	9.48231	8.58575	8.93807	8.4883	8.75217	7.88344	9.65174	8.56095	8.36655	8.49951	9.0197	9.07968	7.84092	8.3618	8.79489	8.88788	10.3331	8.66911	9.47743	8.86238	6.89899	7.63432	9.07096	8.27277	7.42701	7.78726	8.25654	8.45118	9.36213	8.2793	7.6858	8.92716	7.36293	8.38907	7.41445	8.7647	10.0726	8.57062	7.25511	8.24235	8.04963	8.75486	9.12028	7.94711	6.75021	8.31311
ARIH1	7.40252	7.62757	6.80497	7.79516	7.39865	7.83138	6.86829	8.01157	7.05655	7.14471	8.33365	8.05236	7.75554	8.15518	7.0255	8.16462	7.58153	7.77316	7.4838	7.87867	6.76509	7.58706	7.72726	7.71371	7.81087	7.66894	6.95457	6.79879	6.09624	7.30582	6.18211	6.54614	6.9961	6.73171	7.55499	6.22006	6.68089	5.66975	6.83994	7.62385	6.99097	7.91975	7.13027	7.87078	7.95553	7.94883	7.5004	6.72262	7.06711
ARIH2	7.04043	7.0751	5.88564	7.1264	7.17387	6.90788	7.25279	6.74091	7.34447	7.23716	7.08853	6.68823	7.49436	6.37793	6.63452	6.72766	6.45582	6.74751	6.85168	6.82287	6.55986	7.11746	8.23075	6.31351	6.10959	6.82799	6.71225	5.48048	6.53937	7.10229	5.8534	5.9562	5.61993	6.2378	6.52497	7.04769	6.81084	6.51875	6.41306	6.28502	6.50992	5.70179	6.86474	5.90276	5.5652	6.85663	6.21926	6.84071	6.3205
ARL1	9.07085	6.63995	7.24912	8.18175	7.76102	7.48444	7.13841	7.60257	6.69749	7.86027	7.97598	8.32216	8.30478	8.37506	7.93882	6.85192	7.69096	8.44408	7.5907	8.04135	6.93757	8.1109	7.91116	8.2276	8.05289	7.82881	7.15611	5.996	7.20503	7.3134	7.43939	6.07244	6.66002	6.62881	6.91611	6.45412	6.59791	6.48023	6.85873	7.86918	7.55256	6.73966	7.12035	6.68732	7.48471	7.43149	7.24327	6.19532	6.60646
ARL10	7.18244	10.1032	9.05026	8.04979	8.84843	8.9678	8.53397	7.67947	8.85228	9.41824	8.41459	7.80721	8.42713	8.1862	8.73076	7.90302	8.35391	9.27275	7.45206	7.74788	8.60888	8.54056	8.72049	9.03084	8.82601	8.31594	8.24295	7.68506	9.55446	9.1427	8.11354	7.95326	8.39664	9.13465	8.72068	9.61383	8.8963	9.03054	8.38767	8.60485	7.41377	8.98574	8.4318	8.17739	8.99232	7.41918	8.06902	8.93138	7.49145
ARL11	4.45036	2.74958	2.89977	3.36076	2.79106	2.74181	3.37537	2.86481	2.6727	3.10851	2.54187	4.08127	2.85724	3.0121	4.16894	2.32393	2.6359	3.60443	4.13826	4.03973	2.90068	2.33809	2.61522	2.88729	3.61392	3.7622	3.61506	2.67462	2.0742	2.63197	3.75525	3.58514	2.64703	2.74719	3.5617	2.90995	2.69527	3.11159	3.70781	4.60084	3.36379	2.83859	4.39297	2.42332	2.59807	2.84323	3.36083	2.77857	2.29188
ARL13B	8.17813	7.44423	7.4388	8.42111	7.92893	7.75694	7.92349	8.89605	7.47265	8.4091	7.33545	7.82135	8.16769	7.83553	7.78322	5.5158	7.81655	8.36668	7.80137	8.00174	6.91844	8.1223	8.53863	6.95767	8.12151	7.97875	6.9289	6.38908	8.05607	8.2984	7.204	6.21175	7.37918	6.48249	7.57691	6.91815	7.04737	6.89298	7.8412	7.26633	7.18964	7.41375	7.46225	7.57185	6.93077	7.73085	7.01312	7.21719	6.29673
ARL14	2.73023	2.7145	2.71658	2.56919	2.93821	2.69808	2.68617	2.60481	2.76973	2.89294	2.7088	2.85453	2.76475	2.93997	2.71658	2.74356	2.70108	2.59807	2.77534	2.7856	2.69418	2.86978	2.78303	2.61424	2.92403	3.00691	2.47031	3.17996	2.78274	2.85975	3.02029	2.87827	3.06855	2.62148	2.53668	2.53208	2.53839	2.42485	2.92164	2.67952	2.53974	2.73593	2.58092	2.87525	2.76788	2.81823	3.71286	2.72285	2.71554
ARL15	4.99761	5.8193	4.68486	4.95683	5.86466	4.45044	4.81377	4.4918	3.82647	4.60863	4.89545	4.38188	4.31652	4.86361	4.72983	4.09219	4.53743	4.40826	6.01549	6.03073	4.52682	4.59533	4.25997	5.27528	4.56328	4.83185	4.92318	5.32357	4.38759	5.19938	4.48463	4.33596	3.66167	4.48146	4.05944	4.37496	5.74571	4.65303	4.85735	4.26255	4.20473	4.26119	4.49125	4.03829	5.45308	3.48706	4.69031	4.58923	4.91051
ARL16	7.84076	7.227	6.26134	7.45486	7.718	7.46988	6.43105	7.08877	6.62718	7.62149	6.4626	7.1245	6.85647	7.23329	7.00268	6.95933	7.40065	7.24113	6.63235	7.26409	6.57465	7.21124	8.15603	7.80284	8.75219	7.1631	6.72594	7.76623	6.18203	6.54949	6.57684	6.92178	6.81501	7.21228	7.0748	6.9964	6.98344	6.77345	7.12334	6.80119	7.21985	6.72632	7.1739	7.01514	7.33413	6.80002	7.30748	7.18889	6.90945
ARL17A	5.44491	6.81825	4.38939	5.11963	5.80967	5.03391	6.73681	5.90078	5.67617	5.93457	6.07131	6.48522	5.06581	6.0835	5.31677	3.99732	4.55205	5.9121	6.27923	5.57728	4.89002	6.72726	6.04329	4.91237	5.47818	5.63484	4.97099	4.98426	5.58432	5.79829	5.88284	5.12419	5.97375	5.95142	5.47909	5.96863	7.02442	5.35005	5.54044	5.30232	4.68531	6.25118	5.59141	6.64644	5.24022	5.5503	5.78428	4.82068	5.2877
ARL2	7.61985	7.22864	7.46178	8.36258	7.74737	7.63029	7.35035	7.65732	7.38779	7.90414	8.00721	8.33974	6.84648	7.76088	7.56687	7.90587	7.27387	7.89011	7.70402	8.23127	7.62307	7.73515	8.05136	7.99807	9.24568	7.91655	8.45399	7.1086	7.30285	7.24532	7.31491	8.08822	7.5705	8.46068	7.9978	8.7884	8.30446	8.57076	8.03954	7.2367	9.01491	7.59455	8.60995	8.6391	8.75196	8.18832	8.83081	7.80552	7.96463
ARL2BP	8.75325	9.00344	7.80941	8.69638	8.38824	7.39573	7.69031	8.46778	7.95309	8.38909	9.15249	8.65254	9.01472	8.84524	8.30381	8.4095	8.2186	8.68827	8.85594	8.54919	8.66414	9.08665	9.02484	8.74326	8.20403	8.52875	7.75206	7.40994	7.47257	8.70613	7.8621	6.90524	7.0817	8.53122	9.01384	8.73233	8.35495	7.66505	8.13565	8.38165	8.34351	8.72881	9.07899	8.04817	9.80639	8.49545	8.00745	8.41283	7.40771
ARL3	6.01704	5.7865	5.24365	5.4444	6.56873	5.12895	5.37175	6.41174	5.72806	5.56222	5.9356	5.14877	5.73807	5.84555	6.23896	5.369	5.37994	6.12313	6.10701	5.38773	6.02861	6.4966	5.33883	5.96004	6.13434	5.04897	5.42119	5.99527	6.52443	6.33924	5.84259	6.72898	6.23207	6.2765	6.00562	5.82881	6.76549	6.29385	7.17685	6.43858	6.78178	6.60795	5.74698	7.0235	6.83813	6.42833	5.75416	6.51574	7.13423
ARL4A	8.70441	9.24908	8.93571	8.26304	9.40203	10.1697	9.58965	8.55081	8.95105	8.24562	9.91523	7.77266	10.4804	8.87068	8.20815	8.82301	9.17298	9.02479	8.627	8.73096	9.86555	10.0687	9.56699	8.7883	8.57593	10.2873	7.74311	9.98698	8.80624	9.68893	8.55332	7.6963	8.5576	8.88708	8.68994	9.74396	8.85657	9.5282	8.6851	7.68429	8.16243	7.34832	8.99854	8.39624	9.25715	7.97505	9.30082	10.2912	7.40469
ARL4C	9.30397	8.84841	10.4555	10.3383	9.72222	10.1549	9.12656	10.6013	9.37135	10.2456	8.99302	9.21152	9.77285	10.5723	9.41916	10.6843	8.62418	11.0991	7.91307	10.3097	9.12484	8.86991	10.5326	8.78087	8.24098	10.8625	8.24069	9.15302	9.04882	8.64767	7.86335	8.14297	8.87793	7.76129	7.51441	4.30348	8.0968	5.94858	8.47483	9.00352	7.38551	10.7715	8.12503	10.0054	9.72646	10.1069	9.85644	7.52327	8.92943
ARL4D	5.71735	6.11194	6.17366	5.31317	6.19524	6.92669	8.10364	6.82706	6.15532	6.70732	6.29081	6.03842	6.39727	5.70209	6.51369	6.33606	5.90311	6.71566	6.19554	6.28968	6.27809	6.40825	6.33822	6.00005	6.14763	6.59627	5.76919	6.78522	6.69855	5.67013	5.85611	6.2483	8.45641	5.64442	6.22098	6.07368	6.3127	5.65863	5.81319	7.29662	5.93424	7.63622	5.70747	5.77459	5.58432	6.73836	6.65675	5.67498	6.66045
ARL5A	7.33573	6.61017	6.45875	6.59781	7.12039	5.42061	5.51851	6.79681	5.35529	6.31433	6.20385	6.67681	6.56381	7.90693	7.27768	6.69702	6.31909	5.07961	7.46862	6.97078	6.08569	7.50088	6.20278	7.13954	6.4253	5.62157	5.74755	6.495	6.76348	5.75477	6.46159	5.69859	5.46748	5.46748	5.30373	6.73638	5.68222	5.39762	5.65797	6.12223	6.14451	5.89935	5.85336	5.68716	6.07356	6.60598	5.49673	5.90102	5.60612
ARL5B	8.59581	8.9266	8.07124	8.61892	9.15214	8.56484	7.14658	9.66595	8.90377	8.1739	8.99158	8.22033	8.81974	8.80797	8.34645	8.27081	8.36479	8.85128	8.1927	8.4515	8.01669	9.87838	9.33306	8.94945	8.34723	8.03181	7.52153	7.52988	9.24649	8.53135	7.20837	9.49371	8.22757	8.60884	8.8134	8.55305	8.52523	8.34639	8.73595	8.35766	7.52913	9.81785	8.19202	8.56324	8.70181	9.26376	7.7783	8.71761	7.78645
ARL5C	4.57258	4.6519	4.53645	4.78247	4.5404	4.20424	4.68346	4.43644	4.84943	4.56886	4.69258	4.83826	4.61447	4.63492	4.70926	5.03468	4.66461	4.26181	4.23837	4.44388	4.52682	4.55184	4.40629	4.77201	4.50556	4.58679	4.68144	4.31985	4.13276	4.288	4.13529	4.54678	4.45444	4.41626	4.55449	4.38476	3.80237	4.15486	4.30413	4.47217	4.46609	4.41208	4.31771	4.31802	4.38989	4.28045	4.60636	4.46988	4.12406
ARL6	7.92986	6.91378	5.64124	7.30909	7.41099	6.57801	5.75554	7.34437	6.88601	6.62938	6.37306	5.98664	7.31193	7.01941	7.54206	4.91758	6.7818	6.98684	7.64685	6.61758	6.65871	7.50215	7.63837	6.73962	7.08824	6.45447	5.96233	6.51585	5.42878	7.40886	6.26172	5.58137	5.71849	6.72151	6.40304	6.49196	7.7251	6.13106	6.75362	6.06633	6.39953	5.6005	6.25315	6.3026	5.91849	6.40891	6.05785	6.28984	7.84001
ARL6IP1	11.4091	10.799	10.405	11.2152	11.4685	11.8401	10.3562	11.6017	10.7636	11.3888	11.4749	10.8702	12.5001	11.3793	11.1499	11.0522	10.8085	10.9774	10.9396	10.7738	10.4592	11.8497	11.4163	11.0583	10.8588	10.9531	10.3342	8.97379	9.21395	10.5849	9.82598	10.4705	11.0205	10.0167	10.775	10.5621	10.6366	10.3646	10.6389	10.2065	10.0444	10.5834	10.4905	10.5305	11.0912	10.3113	9.19391	10.2943	10.7393
ARL6IP4	6.89483	6.08348	6.54304	6.82004	6.9382	7.10228	7.79168	6.31923	6.67465	6.78178	6.51101	6.758	6.33628	6.46603	6.6308	6.70775	7.7209	6.94137	6.4578	7.05656	7.06496	7.45998	7.56043	7.18003	7.13494	7.14602	6.97408	7.63258	6.73525	6.41424	7.19038	6.56384	7.27501	6.99178	6.90848	6.88922	6.93972	7.57474	6.82236	6.87433	6.90301	6.76194	7.19922	6.74103	7.46275	6.55504	7.67207	7.15651	7.03257
ARL6IP5	10.1802	10.0858	9.78353	10.711	10.5265	9.87047	9.93751	10.3548	9.30609	10.6371	10.377	10.8908	10.279	10.2266	10.269	10.0946	10.8181	10.6659	10.5759	10.4946	10.4269	9.0722	9.83917	9.97367	10.6697	10.9822	10.1453	8.84867	8.40144	9.61051	9.35879	9.42391	7.79308	9.7793	9.96225	9.07381	9.41592	8.87656	9.93257	10.5759	10.4714	9.28705	10.1943	10.2728	10.6676	9.56005	10.3604	9.46507	9.79433
ARL6IP6	10.1743	9.39381	9.67376	9.96422	10.0257	10.2723	8.74683	10.7856	9.80439	10.1854	10.103	10.2597	10.246	10.9237	9.24052	9.49882	9.77274	9.12851	9.76372	9.3817	9.09337	10.4474	10.2655	9.74195	10.0392	9.72064	8.90739	8.626	9.67826	9.75333	8.76619	8.65332	9.69481	7.99758	9.24992	9.12937	8.37753	8.72869	8.74963	8.90063	8.74554	10.2433	8.46161	10.9985	8.91872	9.84055	9.13924	9.14238	8.41999
ARL8A	7.7349	8.10843	8.27054	7.78454	8.28818	7.60922	7.79933	7.73303	8.03147	7.85167	8.01	7.83879	7.67091	7.87226	8.03476	8.21872	7.42058	7.92463	7.43333	7.67557	7.83865	7.18844	7.69724	7.82592	7.78223	7.22382	8.0251	8.38127	8.68769	8.63926	7.81377	7.58841	8.66946	8.24132	8.88478	8.49681	8.17826	8.20599	8.20164	7.68106	8.03184	8.72954	8.13001	8.17633	8.36125	8.27767	7.37655	8.78264	7.9356
ARL8B	8.11839	6.68697	6.61395	8.54405	7.76387	7.46722	7.74646	7.84238	7.09327	7.72711	8.45405	7.81442	8.11262	7.5732	7.8069	7.84668	7.59078	8.32195	7.94367	7.90728	6.68963	7.68294	7.83264	7.67071	7.79422	8.72179	7.29827	6.50347	5.64476	7.56598	6.91213	6.39062	5.47302	6.87368	7.5852	6.92541	7.33389	6.25568	7.47947	7.64544	7.96066	6.96779	7.55093	7.20039	8.15629	8.16372	7.72393	7.03819	7.8746
ARL9	5.9388	6.60245	5.3561	5.8435	6.88643	5.06849	6.08237	4.97422	4.97073	5.1431	6.6685	5.41157	5.17889	5.22028	5.21175	6.53418	5.72944	5.29913	5.07709	5.25502	5.11843	6.91998	6.32103	5.58049	7.1211	5.378	5.698	5.89775	5.0967	5.33266	5.47379	6.3099	5.1149	6.54782	5.48358	6.14536	6.91162	5.01061	4.91142	4.93827	5.13834	4.46513	5.40832	5.32248	4.89726	5.67323	5.31937	5.44212	5.09741
ARMC1	9.24822	9.26329	8.47196	9.26153	9.28631	9.15408	8.14873	9.6722	9.31313	9.3994	9.38871	8.85602	8.92276	9.02606	9.34686	8.73115	8.80599	9.19602	9.33232	8.95687	8.83143	9.53791	9.2487	9.30183	9.09388	9.43727	8.85676	7.39667	6.96616	9.17912	8.16836	8.57454	8.0166	8.89073	8.5733	8.79014	8.78119	8.96519	8.64286	9.0455	9.20082	9.29591	8.85142	8.3315	9.28302	9.01042	8.51126	8.25124	8.83754
ARMC10	8.00165	7.89965	6.62177	8.48237	7.94279	7.83177	6.68744	7.94204	7.23513	8.10554	8.12594	8.7499	8.14777	8.58908	7.78986	8.57724	7.97314	8.22648	7.92074	8.05575	6.74361	8.7135	7.97334	8.26568	8.43942	9.29283	7.3155	7.32855	6.65963	7.73039	7.59856	7.80644	6.83662	8.16052	7.46326	8.22353	7.65384	7.33636	7.85973	7.94833	8.2395	7.75753	7.83455	8.16222	8.3248	8.11385	9.32414	7.18388	6.7951
ARMC12	4.79175	4.85532	4.92772	4.77405	4.68065	4.71668	5.24766	4.47148	5.50352	4.89264	5.0736	5.24853	4.56347	5.01772	5.05962	5.10533	5.08915	4.76377	4.65778	4.98672	4.71914	4.67929	5.36397	5.16701	4.32781	4.8703	4.47325	4.91767	5.6318	4.00175	5.06774	4.78701	4.88988	5.22763	5.19065	5.22379	4.8493	4.81571	4.76326	4.52351	4.97154	4.63081	4.46637	4.84314	5.02686	4.61684	4.60272	4.54995	4.86785
ARMC2	6.65261	3.71537	3.73321	4.9192	3.51071	3.53494	3.48142	3.50152	4.74942	3.4206	3.09542	3.44435	3.26746	4.02911	4.57575	3.21944	3.24635	6.26276	4.00169	3.71485	3.67516	3.67879	3.66154	4.3443	6.02889	3.39532	4.19621	4.09368	2.95586	3.00414	3.21632	3.73445	3.19341	3.20687	3.6434	2.87392	3.78608	2.88225	3.95339	3.76651	3.72967	3.16379	2.86515	2.99274	3.13466	4.22737	3.33058	3.43233	3.95852
ARMC3	7.01338	3.30677	3.43449	5.10015	3.86539	3.07238	3.41745	3.29998	3.38583	3.42789	3.24438	3.31567	3.1494	4.29149	4.45816	3.42496	3.6159	8.88608	3.62284	3.39097	3.40528	3.70237	5.02276	4.03937	7.36366	3.38457	3.55445	3.32209	3.26154	2.84518	3.48678	3.43545	3.14685	4.45172	2.95293	3.30704	3.05763	3.43782	3.33653	3.16363	4.07752	3.14881	3.27052	3.37588	3.24922	3.19629	3.40277	3.18098	3.44033
ARMC4	4.84844	3.45327	3.29227	3.52102	3.12013	3.27394	3.02931	2.95491	2.87443	3.00217	2.97607	3.42971	3.13884	4.40556	2.95851	3.48024	3.22488	6.59381	2.97277	2.85429	3.07725	4.82779	3.0324	4.1854	5.22578	3.27498	3.3277	3.16497	3.03879	3.31975	3.69058	2.99285	3.36172	3.13012	3.20122	3.00062	3.22049	3.13513	3.45436	3.18501	3.38509	2.87065	2.73467	3.08325	3.05166	3.25703	4.34235	2.67404	3.18408
ARMC5	6.36191	6.32689	6.60648	6.24293	6.40234	6.6556	6.55694	6.3687	6.43761	6.50476	6.1393	6.25706	6.45116	6.33135	6.17195	6.56222	6.41954	6.22943	6.49712	6.48504	6.41253	6.61825	6.69975	6.32418	6.37228	6.52213	6.39007	6.85755	6.98962	5.92447	6.6745	6.75062	6.93634	6.4702	6.42645	6.27607	6.31657	6.12697	6.30787	5.91181	6.41587	6.55363	6.64168	6.36786	6.3774	6.37545	6.66984	6.74224	6.93898
ARMC6	6.37474	7.02944	6.70234	6.43542	6.76195	6.96022	6.57746	6.15395	6.5242	6.68656	6.3178	6.27395	6.59856	6.637	5.95258	6.46031	6.26483	6.16974	5.99604	6.31034	6.46292	6.33699	7.1366	6.70698	6.05826	6.00141	6.64748	7.16138	7.33969	6.74399	6.6703	6.68474	6.91208	7.04459	6.74125	6.98403	6.73291	7.10647	6.546	6.28813	6.50275	6.92306	6.97142	7.42756	7.29375	6.56439	7.24499	7.08035	6.82048
ARMC7	4.51489	4.65864	4.43614	4.48607	4.42089	5.02774	5.89408	4.47509	4.71194	4.63588	4.77716	4.45569	4.23025	3.97068	4.51496	4.72845	5.16251	4.56053	4.84014	4.56463	4.31711	4.40178	4.54107	4.64551	4.50175	4.52145	4.85616	5.81785	4.93419	4.09672	4.58485	4.2866	4.67903	4.45698	4.37447	4.74435	4.8126	4.63666	4.27937	4.36002	4.46143	4.21952	4.6604	4.06291	4.52822	4.50263	4.55265	4.86834	4.37191
ARMC8	5.55856	5.84052	3.5385	6.05053	6.10411	5.26186	4.21949	6.73145	4.90494	6.21864	5.42445	6.0433	7.11431	6.48906	5.91453	5.34117	4.47528	6.17009	7.00858	6.2612	4.63816	6.76757	5.19315	5.68938	6.29049	6.2835	4.8358	4.41758	4.35888	7.30528	4.09687	3.39478	5.0116	4.65336	5.05055	5.36216	5.47162	5.7587	5.17179	5.85763	5.43825	5.51632	5.15088	5.34344	5.65228	6.43863	4.53369	5.95902	4.81622
ARMC9	5.25136	5.06067	4.43256	4.87175	4.96246	4.50876	5.44104	4.00464	4.24938	5.04233	4.22133	5.37118	5.20403	6.45481	4.43168	5.21621	5.54428	4.99519	4.56094	4.77982	4.22548	5.36757	6.00487	5.69985	5.1084	5.04288	4.6224	6.99848	4.63777	4.67997	5.45414	4.5939	4.15942	5.3941	5.0196	5.62199	5.1367	4.8231	5.08473	5.53187	4.71547	5.03893	5.10223	6.01215	4.90106	4.60297	6.01535	4.75364	4.9291
ARMCX1	10.1203	10.0259	8.58444	9.61723	9.47693	9.35436	7.03635	9.46233	9.11542	9.68938	9.98338	10.0133	10.8745	9.53752	9.60877	8.70757	8.34984	9.09229	9.57868	9.24406	9.07205	9.65101	10.2942	9.55582	9.47663	8.32861	8.38775	9.13233	9.65076	10.2678	8.18397	9.16761	9.13883	9.11659	9.38937	9.03816	9.19091	8.8465	9.27086	9.37236	9.09463	9.47839	9.46365	9.45029	10.0277	9.89553	9.76348	9.47815	9.20647
ARMCX2	9.30067	9.18275	8.51272	9.23739	8.61533	8.60972	8.78287	8.58955	8.4955	9.95733	9.59741	9.95526	9.97263	9.16562	8.39672	7.72668	9.13815	9.14553	9.48018	9.15258	9.34755	8.70916	10.1711	9.65889	8.8328	9.35081	8.52502	8.64509	8.35604	9.4283	8.92681	9.22893	7.81184	9.56528	9.58898	9.88379	9.37567	8.98292	10.2784	8.96467	9.03739	8.58015	8.70586	10.1241	9.66519	7.97774	9.87887	8.56543	8.87653
ARMCX3	10.0822	9.41107	9.79125	9.84171	9.60404	9.12466	8.31136	9.50131	9.16326	9.70883	9.79273	9.63332	10.789	10.0089	9.36768	7.91071	9.27579	9.27328	10.4174	10.1005	10.2774	9.39882	9.95462	9.35781	9.30548	8.83896	9.01475	9.94932	9.75806	9.72595	8.80852	9.38112	8.67891	9.02367	9.43095	9.05891	9.12456	9.0598	10.2389	8.93081	9.53186	8.69228	9.18819	8.81102	8.89176	9.26459	8.84553	8.97123	9.19394
ARMCX4	4.02234	4.33241	4.4265	3.42089	3.99393	5.46948	3.1477	5.38338	6.38808	4.27539	4.68039	4.22118	6.34142	4.43577	4.67166	4.44577	4.00727	3.83312	4.49881	3.76178	5.62688	4.40675	4.90113	4.71021	4.4374	3.7356	4.19834	4.23398	5.89863	6.2231	4.19958	4.1623	6.5637	5.38337	5.34275	4.68615	5.14098	4.60886	5.78212	6.06163	5.52582	6.26987	4.90388	5.68266	4.46412	6.99894	5.01727	5.35931	4.45736
ARMCX5	6.10084	8.15033	5.40761	6.20384	6.20175	6.79027	5.88127	5.77441	5.40878	7.00512	7.07481	7.13761	7.77481	7.24753	6.28777	5.24989	7.08454	6.98004	7.19406	6.42152	5.81153	6.9194	7.54958	7.29526	6.8281	6.29221	5.77401	6.22912	6.05222	6.81957	6.00717	5.41797	4.95882	6.81323	6.4845	7.30593	7.33766	6.38756	5.53719	6.77297	5.7548	5.80502	6.27973	6.62167	6.56862	5.16819	7.26379	6.69689	5.41074
ARMCX6	10.0426	9.21004	9.53834	9.83381	9.12118	9.57032	9.47375	9.09715	9.89941	9.85686	10.1682	10.5544	11.0255	9.77094	9.34989	9.50805	9.51615	9.75005	9.7452	9.70259	10.2502	8.9337	10.3241	9.6432	9.1001	9.05738	9.93568	10.0967	9.39071	9.96513	9.40063	9.59151	9.4785	9.22795	9.7996	9.32926	9.10359	9.95192	10.0264	8.92307	9.30126	9.16436	9.53158	9.24438	9.13424	8.80632	10.5714	9.454	7.7793
ARNT	4.0556	4.76665	5.55107	4.44228	4.32524	4.55778	4.87945	4.32714	4.75663	4.01215	4.59319	4.09701	3.82265	4.37267	4.71529	5.05845	4.67612	4.63666	4.6056	4.37138	4.53155	4.71651	4.83365	4.56671	4.46049	4.23361	4.60087	6.17617	6.73286	5.71935	5.1388	6.19017	7.38937	5.69085	6.08061	5.25737	4.55422	5.54507	5.35795	6.19832	5.21468	6.75649	5.274	6.30602	4.90353	6.52288	5.23876	5.74288	5.48344
ARNT2	10.2612	8.52019	9.14811	8.45781	9.04618	8.35843	6.00587	8.85557	9.63871	8.26147	8.68803	9.10391	8.5942	8.94849	9.64184	8.25248	9.25671	7.96366	9.91934	9.11807	9.79609	10.1467	8.53192	8.23491	8.88709	6.28309	7.85125	8.28744	10.0084	9.80759	9.33266	8.63667	8.96121	9.08635	9.00972	8.74817	9.90099	9.09987	9.06023	8.88492	9.4711	8.88681	8.67045	7.84865	8.80246	9.36398	3.41036	9.01714	9.76218
ARNTL	6.86335	3.68464	5.92151	6.19511	5.99741	6.26538	5.10215	7.85074	5.71512	6.30586	6.01789	6.39356	6.62509	5.86972	5.63269	5.68541	5.06063	6.50642	5.85618	5.3489	5.49945	4.20788	4.49278	6.10633	5.80426	5.63941	5.24222	6.16085	5.34756	5.43282	6.08019	5.17838	5.63941	5.60188	6.22461	4.06674	6.00042	4.01509	6.61022	7.42638	5.82206	7.17062	5.03362	4.94768	5.73675	7.11316	5.92254	4.75592	7.08435
ARNTL2	5.65164	5.43546	5.75347	5.89201	5.06352	4.12533	4.94361	5.60753	4.77887	4.34589	5.96908	4.63058	5.9029	6.29246	4.02136	5.89956	4.91442	3.71183	4.28059	4.73772	4.93804	5.60565	5.42387	4.60132	3.74482	5.83322	4.17554	6.73056	5.25524	5.05894	5.52411	5.75073	3.68462	4.00874	5.75964	5.57618	5.31941	4.58393	5.05076	4.04764	4.01205	4.06913	4.7081	6.85258	4.65174	4.66644	7.79412	5.01984	4.56533
ARPC1A	9.07867	9.5947	8.06168	9.33236	9.35533	9.5895	9.16994	9.62735	9.3781	9.71225	9.46565	9.79732	9.98085	9.92782	9.07473	9.51567	10.0473	9.03076	9.29912	9.66328	8.79468	9.93279	9.25708	9.78943	9.10395	11.0209	9.19988	9.24426	7.31536	8.18019	8.62177	9.11176	8.76031	9.1722	8.94686	8.92915	8.71591	8.86245	8.60569	9.24338	8.88412	9.07215	9.00936	10.3938	9.51319	8.99675	10.7379	8.79045	8.94758
ARPC1B	8.56921	7.29576	7.92438	9.4471	8.30125	8.45041	10.4321	7.02999	8.02961	8.20081	7.96776	9.65988	8.13562	8.59962	8.96333	8.35295	9.00084	8.34719	8.88769	9.87801	8.8482	6.56996	8.35609	8.02103	9.13511	10.8006	9.68381	10.0263	7.07407	6.25042	9.51999	8.26847	7.06384	7.79617	8.09955	7.79063	7.56062	8.40795	7.91068	9.25748	8.1438	7.07753	9.13974	8.18484	7.60809	6.30381	10.873	7.49505	6.32644
ARPC2	11.0488	11.3244	10.8755	11.7169	11.5809	11.4653	11.4871	10.8748	10.4298	11.8256	11.4978	12.1469	11.6821	11.805	11.304	11.751	11.3949	11.2903	11.3122	11.3776	10.9036	10.7743	11.6232	11.0788	11.4213	11.5807	11.3898	10.5753	10.1512	10.1974	10.904	9.70754	9.80598	10.9884	11.0045	11.0923	10.6628	10.0664	10.5875	11.3262	10.6784	10.9278	11.4904	11.3906	11.6437	10.5409	11.5914	10.6179	10.4368
ARPC3	9.25565	10.6648	10.1097	10.2482	10.2083	10.1348	10.7213	9.40199	9.10491	9.37137	10.5701	10.0103	10.0956	9.54203	9.8162	9.24181	9.68286	9.54489	10.2243	10.3486	9.58719	9.54251	10.7866	9.5321	10.2178	10.0421	9.95708	9.77966	10.0273	9.45486	10.2244	9.29353	9.12539	10.0915	10.0137	10.1379	9.95242	9.7094	9.82004	10.3277	10.1602	10.0227	10.5752	9.71454	10.5827	10.0065	11.1463	9.70673	9.20825
ARPC4	7.0425	6.62576	5.29804	7.7071	7.85469	7.58848	6.58134	7.65062	6.94504	7.8343	7.51088	7.66162	7.78542	7.27072	7.25693	7.53675	7.64698	7.41881	7.45899	7.38394	6.60022	7.66539	7.61324	7.53106	7.38596	8.08505	7.07035	5.17833	5.38324	4.08671	5.63477	6.90156	5.91851	7.37542	7.35087	7.00298	6.60819	6.21267	7.00997	7.79235	7.2584	6.92511	7.8732	7.98745	8.45502	8.15634	8.69357	7.26879	6.80597
ARPC5	8.20478	8.24943	7.21216	8.86681	8.80667	8.37249	8.27819	9.49225	7.04177	8.78286	9.08436	9.07547	8.84844	8.99622	9.21901	8.38192	8.16632	8.98141	7.75769	8.28879	7.34579	8.32719	8.0672	9.02696	8.03482	8.49814	8.54326	8.29838	5.26228	7.61381	6.99431	7.86961	6.33372	8.60094	7.70292	7.75782	7.59098	6.84073	7.72291	9.01895	8.15894	9.18619	8.33055	9.46651	8.93824	8.53417	8.65381	8.74144	7.47701
ARPC5L	6.92839	7.38579	7.89438	7.70352	8.09801	7.95745	7.95476	8.77643	7.5583	8.57958	7.45193	7.81384	8.78595	8.40963	7.18975	7.62769	7.81473	7.07652	7.64068	7.41041	7.46021	7.33073	8.16503	7.7731	7.22879	8.48016	7.17682	8.28326	8.11171	7.8799	7.42011	7.62238	7.91256	8.29562	8.24267	8.472	8.42683	8.09656	7.28479	7.72939	7.2584	8.05627	8.45042	8.4755	8.39296	7.89431	8.57523	7.77778	8.31312
ARPM1	3.49364	4.00201	3.69245	4.85029	3.67728	3.83258	3.44041	3.96874	3.34857	3.55536	5.23704	3.42473	3.40637	3.65101	3.4515	4.66843	4.27051	4.39696	3.30452	4.02932	3.37382	4.33129	3.49593	4.75983	4.84138	5.62675	3.98803	4.01459	4.35249	6.27487	4.04455	4.1341	3.82137	4.34022	3.76592	3.92021	3.89009	3.42061	3.97996	3.68858	3.9181	3.61167	4.48571	4.4517	3.30353	3.49982	4.93245	3.88636	4.42386
ARPP19	9.09754	7.13822	6.59636	7.90641	8.28602	7.46166	5.45756	8.43892	7.08329	7.48906	8.36307	7.43248	7.84979	7.96619	7.74382	7.98426	7.91762	7.90426	7.36854	7.61698	6.56038	7.96027	7.5864	7.98136	8.47625	7.08906	6.97309	4.95119	6.9013	7.13327	6.22455	6.65904	6.74937	7.62044	6.73396	6.83965	9.14923	6.46207	7.66232	7.34299	8.98327	8.16846	7.2638	7.42662	8.20519	8.64067	6.94644	6.65152	9.74392
ARPP21	5.3297	3.07839	3.82787	3.60319	3.54421	3.43209	3.28045	4.6976	3.0841	3.60477	5.91701	3.29925	3.07956	3.10706	3.77908	3.15585	5.09624	2.8954	4.56794	3.84067	3.45419	3.04952	4.35948	3.1458	3.2954	3.14649	3.2398	3.29116	3.8002	4.26584	3.25914	4.675	2.99796	5.61069	5.57048	3.95786	8.58738	3.85931	3.5261	3.20522	9.94265	5.95628	3.12013	3.38735	3.25041	4.40368	3.43944	4.80171	9.30668
ARR3	5.00095	5.01226	5.45066	5.48035	5.1998	5.07427	5.41027	5.28501	5.27074	5.26727	5.39049	5.10371	5.02379	4.99789	5.21416	5.97902	5.14877	5.21183	5.06925	5.01699	5.24467	5.05372	5.10747	5.46199	5.13742	5.2345	5.29464	5.44167	6.24652	5.10238	5.30087	5.53019	5.55555	5.48402	5.29024	5.42387	5.32293	5.37213	5.23258	5.05866	5.06599	5.33891	5.30034	5.06712	5.40251	5.31586	5.69082	5.65652	5.14833
ARRB1	5.91162	7.84161	6.22751	6.11954	7.22187	6.00868	6.44667	5.80149	5.73191	6.34253	6.54963	6.50105	6.36946	5.95271	6.18148	6.36478	7.17194	5.7596	6.25906	6.80377	6.53268	7.24379	6.87904	6.59582	6.25119	6.85059	6.78968	5.94868	6.89159	6.82726	7.88358	6.53874	6.35787	7.47801	6.34916	7.16119	8.76221	7.3836	6.34941	7.11843	7.5193	6.01668	7.53241	7.03946	7.32766	5.41464	5.82076	7.22283	9.08725
ARRB2	5.75873	6.10893	5.49056	5.5268	5.68568	5.07427	5.83063	5.36195	5.5443	5.54738	5.48525	5.91838	5.43871	5.33253	5.56326	6.25244	5.28256	4.88423	6.33354	6.1861	5.78669	5.48312	5.72261	5.3605	5.66354	5.53773	5.87523	6.65083	6.30437	5.88398	7.47505	6.63692	6.6619	6.92157	6.72804	7.54797	7.68072	7.2389	6.8591	6.90953	7.37062	6.27111	6.91071	6.32193	6.47543	6.32398	6.23241	6.50949	6.51546
ARRDC1	4.84502	5.02086	5.86559	5.17378	5.01839	5.07055	6.3993	5.09712	5.28977	5.63252	4.73377	5.0566	5.40914	4.90534	5.00547	5.66891	5.38757	5.0119	5.38198	5.32808	5.68806	5.20492	5.60496	5.23768	5.46805	5.74027	5.75823	5.58047	6.02881	4.26577	5.81563	5.70309	5.38782	5.01705	5.42901	5.10059	5.80888	5.42965	5.38689	5.4075	5.74941	5.05136	5.53033	6.05439	5.19748	4.93948	6.27829	5.43969	5.42721
ARRDC2	5.16351	5.22702	5.92809	5.71767	5.31177	5.15871	7.15097	5.50611	6.01677	5.98957	5.22244	5.92317	5.70082	5.33323	6.29523	5.38682	5.79717	5.88714	6.20035	6.44644	6.00378	5.01619	6.31749	5.18105	5.59305	5.77923	7.30394	6.39333	5.88467	5.89823	6.91014	5.88786	5.66325	6.19884	5.93053	6.89961	6.50736	7.24186	6.11066	5.69004	7.18913	5.8432	6.52333	5.59044	5.08556	5.58113	6.02234	5.73092	6.23581
ARRDC3	9.02048	8.4038	9.08304	9.35614	9.09179	9.22556	8.79344	10.2547	8.37805	9.73598	9.20385	8.2444	9.53036	8.43309	9.54347	9.07966	9.00523	10.9286	8.66321	9.88727	7.35642	9.04197	9.42208	8.83339	9.55383	11.1002	9.07532	7.79892	7.16831	9.84416	8.99762	9.4203	7.5999	7.45944	8.1119	6.89213	8.28242	8.86873	7.80894	9.56423	7.86292	9.43557	8.50211	7.23345	8.01627	9.71707	8.39849	9.09436	7.85179
ARRDC4	11.3832	7.17482	9.01756	9.78394	8.70053	6.78516	8.43738	6.53382	7.0572	7.80432	6.86907	9.45028	8.29521	8.45369	10.0593	6.02865	7.95561	9.93533	9.62909	10.2529	11.7681	7.84818	9.6623	7.55819	9.46104	6.97385	9.84083	4.2621	7.64503	8.46195	7.79483	6.04202	7.77183	8.97353	7.22534	7.69274	7.45713	7.98092	11.0502	6.92895	11.3164	5.40423	9.56179	6.94985	10.0368	5.45062	4.68101	8.41976	7.57538
ARSA	3.91482	4.44032	5.42086	4.89909	4.24031	4.63341	5.36803	4.34559	4.92739	5.71004	5.18378	5.24653	4.69712	4.51958	5.19628	4.86505	4.88187	4.78308	6.01426	5.57048	4.75307	4.74045	4.77811	4.75828	5.54492	5.51603	5.08515	4.31419	5.1498	4.30024	5.2339	4.79584	5.0318	4.87862	5.29999	5.14642	5.04025	5.16246	5.3096	4.84582	5.4614	4.74303	4.70802	5.27704	5.326	4.62603	5.97337	4.20405	4.99856
ARSB	6.05814	6.66228	4.44055	5.85624	6.13078	5.8098	4.96458	5.70282	5.25781	5.4996	6.98187	6.04635	6.05601	6.22315	6.1506	4.57721	6.21712	4.67721	6.88749	6.00064	5.4353	6.21647	5.57812	6.40808	6.4492	6.93985	5.18546	4.95214	4.74479	6.1903	5.71838	5.50031	4.79054	5.26386	5.67776	5.55337	5.61389	5.63016	5.91761	6.5709	5.19153	5.13111	5.01249	4.41962	5.47957	4.78211	5.91077	5.38281	4.89586
ARSD	5.70436	4.3581	4.96475	5.84208	5.98534	6.52304	7.01863	5.4788	7.50866	5.23442	5.44595	6.90199	6.98211	7.21689	5.61617	4.94731	5.56973	6.3801	6.68844	6.26558	6.18371	6.17034	6.43452	6.47052	5.98667	6.59239	5.79775	8.87679	6.10171	5.28036	5.91888	6.05758	6.42287	5.87463	5.78518	5.14589	5.1856	5.95189	5.26877	6.19868	5.43738	6.1474	5.48741	4.58457	5.06612	5.87765	4.74695	5.04538	5.53138
ARSE	4.11405	4.06828	4.13498	4.3223	4.55292	4.82072	5.30859	4.06922	5.01051	3.89351	4.20106	4.57633	4.98394	4.54404	4.54954	4.89754	4.88281	4.02145	4.46976	4.52307	4.81413	4.2368	5.35599	4.53769	4.68829	4.17012	5.11995	5.17514	4.65103	4.18011	5.1652	4.29657	4.31927	5.4935	4.54998	5.68187	5.13644	5.40124	4.54536	5.30558	4.61651	4.50574	5.51219	4.48502	6.03182	4.71239	4.0801	4.44544	5.14833
[truncated: 19,046 more rows]
[truncated: 1 more columns]

## Sheet: Paugh.gmx
Paugh_G34_K27	Paugh_G34_WT
SYNPR	INPP4B
FOXG1	MOXD1
AKNAD1	CPNE4
ONECUT2	FZD8
FZD8	PDZRN4
NPNT	VEPH1
INPP4B	PER3
CPNE4	C14orf23
NPY	IL33
ELOVL2	ROBO2
DLX1	ANGPTL1
MOXD1	NR2E1
STON2	FBXL13
C14orf23	ADAMTS6
NR2E1	STON2
DLX6-AS1	PCK1
TFAP2B	AKNAD1
ZFHX4	TEX15
ARX	MSTN
GAD2	DACH1
[truncated: 70 more rows]

## Sheet: Schwartzentruber.gmx
Schwartzentruber_G34_K27	Schwartzentruber_G34_WT
[truncated: 71 more rows]
