# Supplementary material for: Histone H3.3 Mutations Drive Pediatric Glioblastoma through Upregulation of MYCN
Source: Oxford University Press journal article supplement (doi:10.1158/2159-8290.cd-12-0426), 2013-03-29
Supplement: 21598290cd120426-sup-tab3.xlsx [file 21598290cd120426-sup-tab3.xlsx]

## Sheet: Supplementary Table S3
Supplementary Table S3

## Sheet: G34_K27
Gene ID	Rank in gene list	Rank metric score	Running ES	Core enrichment
DLX5	15	74.4619	0.337845	Yes
SP8	34	32.0394	0.482504	Yes
DLX6	45	26.7132	0.603422	Yes
FAM65B	69	19.5939	0.691153	Yes
ARX	138	10.137	0.733097	Yes
NR2E1	149	9.60268	0.776171	Yes
GPR98	312	5.95165	0.793304	Yes
EYA4	402	5.10639	0.811073	Yes
FZD7	419	4.96651	0.832686	Yes
KIRREL3	639	3.89109	0.836945	Yes
KLHDC8A	694	3.70756	0.850498	Yes
DACH1	981	3.0805	0.846957	Yes
RGS8	1058	2.9595	0.855756	Yes
SNCAIP	1380	2.55514	0.847677	Yes
AKNAD1	1441	2.4993	0.855364	Yes
ZFHX4	1549	2.40627	0.859744	Yes
NEDD4L	3099	1.69561	0.772375	No
RASGRP1	5052	1.30303	0.658482	No
POU4F1	6381	1.11673	0.582045	No
C14orf23	8933	0.853141	0.429337	No
VPS37B	10424	0.710694	0.341109	No
MIR30C2	10955	0.663265	0.311593	No
DLX1	11075	0.652002	0.307255	No
DLX2	11967	0.574797	0.255177	No
CDK6	12900	0.493156	0.200211	No
VEPH1	12908	0.492717	0.202023	No
SLC6A16	13322	0.45462	0.17874	No
FOXG1	14157	0.373399	0.129245	No
PAPLN	14287	0.361554	0.122971	No
INPP4B	15493	0.20692	0.0499455	No
DMRTA2	15870	0.133163	0.0274711	No
TFAP2A	16206	0.0467611	0.00712036	No

## Sheet: G34_WT
Gene ID	Rank in gene list	Rank metric score	Running ES	Core enrichment
DLX5	15	74.4619	0.427854	Yes
SP8	34	32.0394	0.611243	Yes
DLX6	45	26.7132	0.764452	Yes
NR2E1	149	9.60268	0.813428	Yes
GPR98	312	5.95165	0.83776	Yes
KIRREL3	639	3.89109	0.840165	Yes
RGS8	1058	2.9595	0.831561	No
STON2	1387	2.55175	0.82613	No
AKNAD1	1441	2.4993	0.837271	No
LRRC16A	2009	2.12636	0.814727	No
NEDD4L	3099	1.69561	0.757677	No
GPD1	3498	1.58966	0.742412	No
PDE3A	4115	1.45939	0.713022	No
RASGRP1	5052	1.30303	0.663099	No
PER3	6906	1.05575	0.55549	No
C14orf23	8933	0.853141	0.436101	No
DLX1	11075	0.652002	0.308497	No
DLX2	11967	0.574797	0.257141	No
VEPH1	12908	0.492717	0.202306	No
FOXG1	14157	0.373399	0.127887	No
RORB	14469	0.340821	0.110769	No
INPP4B	15493	0.20692	0.0491958	No
ADAMTS6	15862	0.134891	0.0273945	No
DMRTA2	15870	0.133163	0.0277318	No
